# Supplementary material for: Fibrillar extracellular matrix produced by pericyte‐like cells facilitates glioma cell dissemination
Source: Brain Pathol. 2024 May 5;34(6):e13265. doi: 10.1111/bpa.13265 (PMC11483521; doi:10.1111/bpa.13265)
Supplement: Supplementary file 2 — Supplementary Table 2. Proteins detected using the SWATH‐MS approach in gelatin‐coated plates. [file BPA-34-e13265-s001.xlsx]

## Sheet: List1
Supplementary table 2
Proteins detected using the SWATH-MS approach in gelatin-coated plates.
Protein			uniprot ID
sp|O00299|CLIC1_HUMAN			O00299
sp|O43772|MCAT_HUMAN			O43772
sp|O60664|PLIN3_HUMAN			O60664
sp|O75955|FLOT1_HUMAN			O75955
sp|O95336|6PGL_HUMAN			O95336
sp|P02649|APOE_HUMAN			P02649
sp|P31930|QCR1_HUMAN			P31930
sp|P33121|ACSL1_HUMAN			P33121
sp|P41250|GARS_HUMAN			P41250
sp|P41252|SYIC_HUMAN			P41252
sp|P43304|GPDM_HUMAN			P43304
sp|P45880|VDAC2_HUMAN			P45880
sp|P14618|KPYM_HUMAN			P14618
sp|P15144|AMPN_HUMAN			P15144
sp|P62330|ARF6_HUMAN			P62330
sp|Q02543|RL18A_HUMAN			Q02543
sp|Q06124|PTN11_HUMAN			Q06124
sp|Q09666|AHNK_HUMAN			Q09666
sp|Q13492|PICAL_HUMAN			Q13492
sp|Q14195|DPYL3_HUMAN			Q14195
sp|Q14669|TRIPC_HUMAN			Q14669
sp|Q16363|LAMA4_HUMAN			Q16363
sp|Q5T4S7|UBR4_HUMAN			Q5T4S7
sp|Q63ZY3|KANK2_HUMAN			Q63ZY3
sp|Q6WCQ1|MPRIP_HUMAN			Q6WCQ1
sp|Q99536|VAT1_HUMAN			Q99536
sp|Q99832|TCPH_HUMAN			Q99832
sp|Q9UNF1|MAGD2_HUMAN			Q9UNF1
sp|Q9UQE7|SMC3_HUMAN			Q9UQE7
sp|Q9Y6M7|S4A7_HUMAN			Q9Y6M7
sp|Q8WWQ0|PHIP_HUMAN			Q8WWQ0
sp|O60488|ACSL4_HUMAN			O60488
sp|O76024|WFS1_HUMAN			O76024
sp|P00488|F13A_HUMAN			P00488
sp|P00558|PGK1_HUMAN			P00558
sp|P04114|APOB_HUMAN			P04114
sp|P11766|ADHX_HUMAN			P11766
sp|P19022|CADH2_HUMAN			P19022
sp|P30043|BLVRB_HUMAN			P30043
sp|P35579|MYH9_HUMAN			P35579
sp|P35625|TIMP3_HUMAN			P35625
sp|P38646|GRP75_HUMAN			P38646
sp|P49588|SYAC_HUMAN			P49588
sp|P55263|ADK_HUMAN			P55263
sp|P62269|RS18_HUMAN			P62269
sp|P63000|RAC1_HUMAN			P63000
sp|Q04637|IF4G1_HUMAN			Q04637
sp|Q14019|COTL1_HUMAN			Q14019
sp|Q92616|GCN1_HUMAN			Q92616
sp|Q9Y490|TLN1_HUMAN			Q9Y490
sp|P02751|FINC_HUMAN			P02751
sp|P05198|IF2A_HUMAN			P05198
sp|P07195|LDHB_HUMAN			P07195
sp|P08670|VIME_HUMAN			P08670
sp|P11142|HSP7C_HUMAN			P11142
sp|P12273|PIP_HUMAN			P12273
sp|P12277|KCRB_HUMAN			P12277
sp|P23526|SAHH_HUMAN			P23526
sp|P51570|GALK1_HUMAN			P51570
sp|Q6PGP7|TTC37_HUMAN			Q6PGP7
sp|Q7L2H7|EIF3M_HUMAN			Q7L2H7
sp|Q92572|AP3S1_HUMAN			Q92572
