# Supplementary material for: Fibrillar extracellular matrix produced by pericyte‐like cells facilitates glioma cell dissemination
Source: Brain Pathol. 2024 May 5;34(6):e13265. doi: 10.1111/bpa.13265 (PMC11483521; doi:10.1111/bpa.13265)
Supplement: Supplementary file 3 — Supplementary Table 3. Proteins detected using the SWATH‐MS approach in decellularized extracellular matrices produced by 46A and 80A FAP+ pericyte‐like cells isolated from human glioblastomas, human brain vascular pericytes (HBVP), and U87 glioma cells. NA = not detectable. Numbers represent log2 abundance values. [file BPA-34-e13265-s004.xlsx]

## Sheet: Supplementary table 3
Supplementary table 3
Proteins detected using the SWATH-MS approach in decellularized extracellular matrices produced by 46A and 80A FAP+ pericyte-like cells isolated from human glioblastomas, human brain vascular pericytes (HBVP), and U87 glioma cells. NA= not detectable. Numbers represent log2 abundance values.
	cell type	46A				80A				HBVP				U87
Protein	uniprot ID	FAP46_9	FAP46_10	FAP46_11	FAP46_12	FAP80_13	FAP80_14	FAP80_15	FAP80_16	HBVP_1	HBVP_2	HBVP_3	HBVP_4	U87_5	U87_6	U87_7	U87_8
sp|A0AVT1|UBA6_HUMAN	A0AVT1	NA	NA	NA	NA	11.951	11.891	11.9536	11.9633	11.2268	11.3156	11.5105	11.1443	11.9139	12.1176	11.945	11.7596
sp|A0FGR8|ESYT2_HUMAN	A0FGR8	11.2186	10.9878	11.7194	10.7255	12.5583	12.3832	12.8506	12.4824	12.0501	12.1055	11.9011	11.7033	12.9841	12.9849	12.9581	12.9458
sp|A1L0T0|HACL2_HUMAN	A1L0T0	9.19198	NA	NA	NA	11.7909	11.8203	12.3257	11.777	11.0216	11.4303	10.9434	10.8976	12.7812	11.8109	12.0091	11.9735
sp|A1X283|SPD2B_HUMAN	A1X283	NA	NA	NA	NA	NA	NA	10.4792	NA	12.8092	12.5119	12.474	12.651	12.4896	12.1091	12.1714	11.6354
sp|A2RRP1|NBAS_HUMAN	A2RRP1	NA	NA	NA	9.31146	12.0836	12.0373	10.5181	10.6895	11.3709	12.024	11.6605	9.99705	10.1774	NA	NA	10.1476
sp|A5YKK6|CNOT1_HUMAN	A5YKK6	NA	NA	9.87563	10.4676	9.84521	10.4136	11.3504	10.5264	11.5064	11.7363	11.8421	11.66	12.783	12.6443	12.354	12.3721
sp|A6NDG6|PGP_HUMAN	A6NDG6	NA	NA	NA	NA	11.2692	12.1877	12.097	11.8872	NA	10.6526	11.5423	11.9673	NA	NA	11.7661	11.5817
sp|A6NDU8|RIMC1_HUMAN	A6NDU8	NA	NA	NA	NA	11.4359	11.4176	11.761	11.1076	12.4455	12.5042	12.318	NA	12.6674	12.8741	12.6126	11.7329
sp|A6NHR9|SMHD1_HUMAN	A6NHR9	NA	NA	NA	NA	11.3375	11.054	11.0638	11.5955	11.3899	12.3118	11.3001	10.467	12.0818	12.3552	11.9123	12.1367
sp|E9PAV3|NACAM_HUMAN	E9PAV3	10.9385	NA	NA	NA	14.0928	14.0658	13.7246	13.591	14.2621	14.184	14.2667	14.4067	13.8991	13.5095	13.8784	13.8756
sp|O00139|KIF2A_HUMAN	O00139	NA	9.11727	NA	NA	10.7914	11.3107	9.51147	10.3756	NA	11.3779	11.2488	10.93	12.2389	11.7398	12.1769	11.8348
sp|O00148|DX39A_HUMAN	O00148	NA	NA	NA	NA	10.0129	9.86775	9.84646	9.85657	11.4318	10.788	11.3811	11.1562	14.1738	13.0543	14.1453	13.2096
sp|O00151|PDLI1_HUMAN	O00151	NA	10.2214	10.4451	NA	13.644	13.5636	13.7999	13.4419	13.4532	13.3187	13.4427	13.4657	12.9744	13.0201	12.8142	12.5261
sp|O00154|BACH_HUMAN	O00154	10.0932	NA	10.4111	9.85391	13.3695	13.6793	13.5683	13.6317	11.8485	12.3655	12.1034	12.7774	14.1121	13.4458	13.7416	13.776
sp|O00159|MYO1C_HUMAN	O00159	12.5004	12.6313	12.5608	12.4139	13.0453	13.0101	13.0463	12.9708	13.4909	13.4386	13.2771	13.2349	13.0988	13.0696	12.9973	13.0461
sp|O00161|SNP23_HUMAN	O00161	NA	NA	NA	NA	12.0588	12.1945	12.2192	11.9534	12.0474	12.1611	12.0968	NA	13.0516	12.7008	12.8097	12.8104
sp|O00165|HAX1_HUMAN	O00165	NA	NA	NA	NA	NA	NA	NA	NA	10.1339	9.64924	NA	NA	10.4499	10.3647	10.212	10.4061
sp|O00170|AIP_HUMAN	O00170	NA	NA	NA	NA	11.2941	11.0395	10.5426	11.062	11.427	11.3489	11.2871	11.3852	12.9148	12.8346	12.7982	12.6922
sp|O00178|GTPB1_HUMAN	O00178	NA	NA	NA	NA	11.7685	11.8105	12.1071	11.8757	12.0873	11.9385	12.2068	12.1859	11.6763	11.3622	NA	11.2396
sp|O00186|STXB3_HUMAN	O00186	8.7448	NA	NA	NA	12.0574	11.6643	11.4634	11.7201	11.6941	11.2549	11.4991	11.3333	13.1598	12.8878	13.1482	13.1118
sp|O00194|RB27B_HUMAN	O00194	10.8116	11.3162	NA	11.0449	NA	11.6935	11.3938	11.7424	NA	NA	NA	NA	14.0462	14.3887	13.7922	13.7691
sp|O00203|AP3B1_HUMAN	O00203	10.7311	10.3723	10.8725	10.5537	13.133	13.1547	13.1907	13.2303	12.5429	12.7421	12.6758	12.5896	13.1396	12.8193	12.9737	12.8412
sp|O00214|LEG8_HUMAN	O00214	11.9952	12.5033	11.516	12.4941	12.2463	12.8188	12.572	13.0098	11.2088	NA	NA	11.1927	11.8207	10.9519	10.9982	11.9056
sp|O00217|NDUS8_HUMAN	O00217	10.5864	NA	NA	9.40549	12.6423	12.5733	12.6039	12.4312	12.9475	13.0332	12.9756	12.7927	13.5972	13.4217	13.3861	13.3976
sp|O00231|PSD11_HUMAN	O00231	9.74178	10.8407	9.75706	9.93507	12.0641	11.955	12.118	12.2088	12.333	12.6123	12.6416	12.4838	13.0603	12.9915	12.7797	12.859
sp|O00232|PSD12_HUMAN	O00232	NA	NA	NA	8.85883	12.1297	12.1697	12.2723	12.2131	12.4316	12.0727	11.9522	12.3137	12.9776	12.6721	12.4987	12.5098
sp|O00233|PSMD9_HUMAN	O00233	NA	NA	NA	NA	12.1433	11.9294	12.1226	11.9462	11.6977	12.7979	12.8954	13.2031	11.7617	13.1164	13.1902	13.1866
sp|O00264|PGRC1_HUMAN	O00264	10.6392	10.5517	10.8488	10.474	14.0242	13.9676	14.2234	14.2908	14.2533	14.2435	13.9982	14.1432	14.1797	13.6648	13.7409	13.5001
sp|O00299|CLIC1_HUMAN	O00299	11.2627	11.3549	10.7902	10.3094	14.6782	14.685	14.6973	14.6099	14.0996	14.1474	13.9604	14.1484	13.9314	13.9349	13.8179	13.66
sp|O00303|EIF3F_HUMAN	O00303	11.5084	11.333	11.3682	10.3191	13.1886	13.4296	13.4411	12.9698	13.8383	13.6014	13.6898	13.8357	14.2922	14.064	14.1268	14.0236
sp|O00330|ODPX_HUMAN	O00330	10.7185	NA	10.1338	NA	12.3324	12.1577	12.839	12.8054	NA	11.4226	11.6588	11.6971	NA	NA	11.2663	11.3965
sp|O00339|MATN2_HUMAN	O00339	12.718	13.0127	12.742	12.864	10.5525	11.3373	11.3927	10.8348	10.9985	11.3571	11.7771	11.7266	10.5235	10.5786	10.7443	10.4221
sp|O00391|QSOX1_HUMAN	O00391	NA	NA	NA	NA	10.3397	10.8333	10.4653	9.27244	12.815	12.9506	13.0189	12.1647	9.85731	NA	NA	NA
sp|O00399|DCTN6_HUMAN	O00399	NA	NA	NA	NA	NA	NA	NA	NA	11.7043	NA	11.4374	NA	11.2245	NA	11.5285	11.8438
sp|O00400|ACATN_HUMAN	O00400	NA	10.8775	NA	NA	11.0238	10.9947	10.9241	NA	10.6706	10.8728	11.1701	11.9337	11.6688	11.6023	12.0689	11.8453
sp|O00401|WASL_HUMAN	O00401	NA	NA	NA	NA	10.7431	NA	11.0212	NA	10.9213	NA	10.5804	10.728	12.1487	11.5198	12.4925	11.7476
sp|O00410|IPO5_HUMAN	O00410	8.86829	8.07002	9.54274	9.86488	13.1441	13.0993	13.2611	13.0812	13.0511	12.969	12.9691	12.9085	14.1904	14.0692	13.9775	13.8032
sp|O00422|SAP18_HUMAN	O00422	11.2465	11.1651	11.2112	10.8416	11.3591	11.3873	11.0357	11.2295	13.0653	13.2763	13.0298	12.8669	13.1171	13.0157	12.8685	12.8524
sp|O00423|EMAL1_HUMAN	O00423	NA	NA	NA	NA	NA	NA	NA	NA	NA	10.6648	10.6344	10.3684	12.3077	12.1646	11.6966	11.822
sp|O00425|IF2B3_HUMAN	O00425	9.72886	9.75773	8.77886	9.96347	12.3522	12.468	12.3488	12.5725	13.5887	13.4723	13.619	13.4885	13.3161	12.9368	13.07	12.8237
sp|O00429|DNM1L_HUMAN	O00429	9.1844	9.10379	8.31548	NA	12.0782	11.9307	12.1016	12.1057	11.9238	12.1552	11.8978	11.8854	12.2747	12.0577	12.0146	11.8851
sp|O00442|RTCA_HUMAN	O00442	NA	NA	NA	NA	11.3131	11.066	11.5306	11.4405	10.9001	10.8883	10.997	10.7014	13.1613	13.1108	12.9431	12.858
sp|O00461|GOLI4_HUMAN	O00461	11.671	11.6985	11.2993	11.8717	12.9907	12.7113	13.2763	13.0718	12.9084	13.1456	12.934	12.6453	12.357	12.5182	12.0364	11.6529
sp|O00462|MANBA_HUMAN	O00462	NA	NA	NA	NA	NA	NA	NA	NA	12.3771	12.1482	11.953	NA	NA	NA	NA	NA
sp|O00468|AGRIN_HUMAN	O00468	14.3505	14.3219	14.2714	14.1743	11.1547	11.1578	11.5745	11.2616	11.022	11.0809	10.8517	11.4485	8.79215	NA	8.06842	8.57237
sp|O00469|PLOD2_HUMAN	O00469	9.52048	NA	9.51282	NA	11.8785	11.7896	12.029	11.8481	11.5095	11.8619	11.68	11.5175	13.0597	13.1287	13.1318	13.2575
sp|O00471|EXOC5_HUMAN	O00471	NA	NA	NA	NA	11.7782	11.6853	11.7564	11.7538	NA	NA	12.0788	11.7736	12.2046	11.7428	12.0729	12.1653
sp|O00478|BT3A3_HUMAN	O00478	NA	NA	NA	NA	9.85008	10.7413	10.4927	11.5809	9.57747	9.45141	9.16647	9.91373	NA	NA	NA	NA
sp|O00483|NDUA4_HUMAN	O00483	NA	12.3577	12.5342	12.0503	14.7426	15.0199	14.7957	14.746	14.2884	14.8623	14.8413	14.711	14.4344	14.9976	14.8649	14.8087
sp|O00487|PSDE_HUMAN	O00487	10.4011	10.612	10.7385	10.5309	12.1619	11.9346	12.2305	12.0596	12.1775	12.0821	11.2594	12.3001	12.948	12.697	12.6668	12.6677
sp|O00499|BIN1_HUMAN	O00499	NA	NA	NA	NA	NA	11.0101	NA	NA	12.0153	12.3853	12.3414	12.4161	12.2441	12.4148	12.0661	12.3445
sp|O00505|IMA4_HUMAN	O00505	NA	NA	NA	NA	11.0778	11.2683	11.8369	11.6557	12.5635	12.1411	12.5292	12.4969	11.8846	11.4209	11.3768	11.2271
sp|O00534|VMA5A_HUMAN	O00534	NA	NA	NA	NA	NA	NA	NA	NA	12.7708	12.5684	12.6219	13.0875	11.8553	NA	NA	NA
sp|O00541|PESC_HUMAN	O00541	NA	NA	NA	NA	11.4579	11.0116	10.9083	NA	11.7177	12.5767	12.375	12.3159	13.8002	12.9065	13.0769	13.0354
sp|O00560|SDCB1_HUMAN	O00560	10.7435	10.6071	10.9584	10.7268	11.0987	9.94085	10.4953	10.4721	12.4274	10.6721	12.0941	12.2704	12.4845	12.2276	12.4449	12.0908
sp|O00567|NOP56_HUMAN	O00567	10.6855	10.866	11.0322	10.3891	11.9069	12.1753	12.201	12.0997	13.2606	13.1335	13.0471	13.1207	13.0731	12.7237	13.0603	12.7168
sp|O00571|DDX3X_HUMAN	O00571	11.1787	11.1707	11.4802	11.3362	12.7087	12.4587	11.9631	12.4891	12.8281	12.8336	12.6437	12.8775	12.8164	12.9666	13.4522	13.1597
sp|O00584|RNT2_HUMAN	O00584	NA	NA	NA	NA	NA	NA	NA	NA	NA	NA	NA	NA	12.522	NA	12.4079	12.6244
sp|O00622|CCN1_HUMAN	O00622	13.8777	13.8559	13.6612	13.5285	11.1356	11.1929	11.1386	11.3511	10.9274	10.5935	10.0169	10.5009	NA	NA	10.3508	9.21021
sp|O00629|IMA3_HUMAN	O00629	10.5556	NA	NA	NA	12.2911	12.108	11.3234	12.1591	11.9105	12.2518	11.7562	11.5096	12.2557	11.9797	11.9816	11.8899
sp|O00743|PPP6_HUMAN	O00743	NA	NA	NA	NA	11.2713	NA	NA	11.2477	NA	NA	11.371	11.5357	11.2937	NA	11.595	11.473
sp|O00746|NDKM_HUMAN	O00746	NA	NA	NA	NA	NA	12.5757	12.3904	NA	12.7566	12.7951	NA	12.6365	NA	NA	NA	NA
sp|O00754|MA2B1_HUMAN	O00754	NA	NA	NA	NA	11.741	11.6862	11.5457	11.4934	12.7894	12.6818	12.7482	12.3932	11.2027	11.3075	11.143	11.1188
sp|O00764|PDXK_HUMAN	O00764	NA	NA	NA	NA	11.8028	11.6358	12.1128	11.6891	11.1503	11.5507	10.4529	10.9308	12.3028	12.3607	12.4033	12.4309
sp|O00767|SCD_HUMAN	O00767	12.3348	NA	12.5738	12.1891	14.5335	NA	14.3023	14.435	NA	NA	NA	NA	15.2758	14.9573	15.1912	14.9249
sp|O14495|PLPP3_HUMAN	O14495	NA	10.671	9.9243	9.72915	9.74171	9.43518	9.92482	9.67689	14.2539	14.1162	14.1247	14.3604	9.96156	NA	9.86097	NA
sp|O14497|ARI1A_HUMAN	O14497	NA	NA	NA	NA	NA	NA	NA	NA	11.334	NA	NA	NA	12.1092	11.1954	NA	10.9798
sp|O14498|ISLR_HUMAN	O14498	13.1154	11.6765	12.675	12.9818	14.4842	14.6192	14.9689	14.7117	10.5837	NA	NA	10.7596	NA	NA	NA	NA
sp|O14530|TXND9_HUMAN	O14530	9.48073	9.18269	NA	9.0617	11.2482	11.4166	11.4675	NA	11.2739	11.4724	11.2785	11.3346	11.951	11.8661	12.0527	11.9994
sp|O14545|TRAD1_HUMAN	O14545	NA	14.1348	14.4574	NA	NA	NA	12.4908	NA	NA	11.5384	NA	11.9224	NA	NA	11.8219	NA
sp|O14548|COX7R_HUMAN	O14548	11.2624	NA	NA	NA	11.6958	11.8287	11.9589	11.8431	12.0205	11.769	11.3793	11.9586	13.0482	12.9499	12.813	12.7239
sp|O14558|HSPB6_HUMAN	O14558	8.639	8.79403	9.32607	NA	14.1431	14.029	14.0779	14.1782	13.9414	14.1469	13.9281	13.8594	10.6588	10.3718	10.6606	10.9645
sp|O14561|ACPM_HUMAN	O14561	NA	NA	NA	NA	NA	NA	NA	NA	13.5213	NA	12.9624	NA	13.3148	NA	NA	NA
sp|O14562|UBFD1_HUMAN	O14562	NA	NA	NA	NA	11.144	11.602	11.4846	11.7522	11.4732	11.4857	11.7095	11.9493	11.2986	11.2094	11.3145	10.9836
sp|O14579|COPE_HUMAN	O14579	12.5024	11.9761	11.9953	11.964	13.2645	13.3502	13.3287	13.2723	13.6933	13.499	13.4624	13.4295	13.1814	13.0245	13.0412	12.901
sp|O14617|AP3D1_HUMAN	O14617	10.3429	11.3695	10.9235	10.1163	12.8049	12.8052	12.7694	12.6318	11.761	11.5279	11.8411	11.2436	12.5168	12.7567	12.7431	12.5249
sp|O14618|CCS_HUMAN	O14618	NA	NA	NA	NA	NA	11.4495	11.28	12.1367	12.332	12.4567	12.5281	12.3212	12.7439	13.0638	13.281	12.9962
sp|O14653|GOSR2_HUMAN	O14653	NA	NA	NA	NA	11.7636	10.6233	11.5515	11.1998	11.9892	11.9563	11.9944	11.4934	11.9603	12.1956	11.7721	12.054
sp|O14656|TOR1A_HUMAN	O14656	NA	NA	NA	NA	12.2492	12.1031	11.1117	12.1673	12.0439	12.2284	11.7398	11.1897	11.7808	11.7965	12.1219	12.1076
sp|O14662|STX16_HUMAN	O14662	NA	NA	NA	NA	NA	NA	NA	NA	NA	11.7388	12.2244	NA	11.7913	11.4724	11.7206	11.6889
sp|O14672|ADA10_HUMAN	O14672	NA	NA	NA	NA	13.0713	12.896	NA	13.2369	NA	NA	NA	NA	NA	NA	NA	12.3432
sp|O14681|EI24_HUMAN	O14681	9.4037	9.47065	9.42276	8.94178	11.0257	NA	11.2641	11.2418	10.5853	11.5428	9.90453	10.1982	9.63156	NA	NA	NA
sp|O14735|CDIPT_HUMAN	O14735	10.6384	11.0566	10.6622	10.6781	13.2698	13.2594	12.8963	13.2641	12.5983	13.1899	12.8984	12.1159	13.2884	13.5835	13.5951	13.815
sp|O14737|PDCD5_HUMAN	O14737	NA	NA	NA	NA	12.4042	12.4311	12.1236	12.4978	12.432	12.8894	12.8753	12.622	13.007	13.1492	13.093	13.0187
sp|O14744|ANM5_HUMAN	O14744	NA	NA	10.0022	10.0909	12.3959	12.5329	12.4712	12.3522	12.7649	12.8383	12.7728	12.6733	12.7875	12.6742	12.593	12.596
sp|O14763|TR10B_HUMAN	O14763	NA	NA	NA	NA	NA	12.1819	NA	12.4724	12.4379	12.8423	12.7925	NA	NA	NA	NA	NA
sp|O14773|TPP1_HUMAN	O14773	10.1423	8.83821	10.6723	10.1817	11.5814	11.9491	12.5449	12.5813	11.0921	12.709	12.6052	12.1327	13.4719	13.8303	13.5051	13.51
sp|O14776|TCRG1_HUMAN	O14776	NA	NA	11.5362	11.4354	NA	NA	11.8772	NA	12.2599	11.6666	12.8724	12.2283	11.806	12.7032	12.6984	12.1936
sp|O14786|NRP1_HUMAN	O14786	NA	NA	10.3545	NA	11.3763	11.5332	11.6974	11.5923	12.0273	12.2357	11.8527	12.109	12.6568	12.3617	12.421	12.1292
sp|O14818|PSA7_HUMAN	O14818	11.6517	NA	NA	NA	13.1532	13.4172	13.2408	13.1347	13.4137	13.404	13.3869	13.3418	13.4443	12.5826	13.3731	13.4138
sp|O14828|SCAM3_HUMAN	O14828	NA	NA	10.6873	NA	12.9001	12.8521	12.5312	12.384	12.1462	11.7548	11.8711	11.4955	13.3524	12.9796	13.2871	13.0326
sp|O14879|IFIT3_HUMAN	O14879	NA	NA	NA	NA	12.159	12.7227	12.6074	12.6726	NA	NA	NA	NA	NA	11.8467	NA	NA
sp|O14880|MGST3_HUMAN	O14880	13.2988	13.2146	13.5505	11.8754	14.23	14.6769	14.5541	14.6698	11.6663	13.1958	13.2594	12.5845	13.443	14.6067	14.1783	14.5571
sp|O14907|TX1B3_HUMAN	O14907	11.9978	12.2461	12.2264	11.6452	12.9144	13.2541	12.9772	13.142	12.6973	13.0068	13.0278	12.1102	12.2049	12.3664	12.4134	12.2609
sp|O14908|GIPC1_HUMAN	O14908	NA	NA	NA	NA	12.4536	12.5356	12.7594	NA	NA	12.1476	NA	12.2374	12.8152	12.9194	12.6176	12.5883
sp|O14929|HAT1_HUMAN	O14929	NA	NA	NA	NA	NA	NA	11.3531	11.497	NA	NA	NA	11.394	13.0001	12.7259	12.4255	12.7141
sp|O14933|UB2L6_HUMAN	O14933	NA	NA	10.0107	10.4485	9.47263	12.0311	11.2739	12.1836	10.7818	NA	NA	9.02437	8.96565	9.2923	9.00819	12.4213
sp|O14949|QCR8_HUMAN	O14949	12.6316	12.4706	12.0871	NA	12.1606	12.3959	12.4774	12.3522	13.6986	13.1097	13.1791	13.6444	14.312	13.3267	13.3025	NA
sp|O14964|HGS_HUMAN	O14964	NA	NA	10.7962	NA	12.3945	12.2388	12.5882	11.9988	12.3509	12.4843	12.2702	12.3284	12.8997	12.8418	12.7162	12.5721
sp|O14972|VP26C_HUMAN	O14972	NA	NA	NA	NA	10.7835	10.7186	11.0075	10.9348	11.1325	NA	NA	NA	11.4425	11.3353	11.4384	11.7735
sp|O14974|MYPT1_HUMAN	O14974	11.1495	11.4259	11.0501	10.8688	12.2107	12.2301	12.2023	11.7969	12.8898	12.766	12.766	12.7114	12.2447	11.6884	11.4267	11.7287
sp|O14976|GAK_HUMAN	O14976	8.93059	NA	8.92919	NA	10.9039	10.575	11.8187	10.7853	10.3286	10.185	11.2237	10.9443	12.3103	11.9342	11.9405	12.0271
sp|O14979|HNRDL_HUMAN	O14979	11.086	11.1562	NA	10.8448	12.3246	12.6688	12.5824	12.6382	13.9996	13.9292	13.9218	13.6056	13.4366	13.7755	13.8932	13.7104
sp|O14980|XPO1_HUMAN	O14980	10.0193	9.71408	8.14173	10.066	11.585	11.3479	11.3798	11.6365	12.065	12.2633	11.8426	11.7849	12.8988	13.0691	13.024	13.0968
sp|O15027|SC16A_HUMAN	O15027	NA	9.79348	9.69965	9.77377	11.8227	12.052	11.5209	11.9434	11.7962	11.2073	10.9253	12.1779	11.5412	10.6685	10.7032	10.2
sp|O15031|PLXB2_HUMAN	O15031	NA	NA	NA	NA	12.3956	12.2534	12.3332	12.1709	12.4923	12.2661	12.333	12.4597	12.6295	12.6528	12.4847	12.2467
sp|O15042|SR140_HUMAN	O15042	NA	NA	NA	NA	10.5559	NA	10.3137	9.98078	11.2319	11.6081	11.269	10.829	12.7572	12.3141	12.3706	11.7081
sp|O15061|SYNEM_HUMAN	O15061	10.7468	10.9535	NA	10.4128	11.0734	12.351	12.731	12.2657	NA	10.6579	11.0223	10.8128	10.5105	NA	NA	10.3984
sp|O15067|PUR4_HUMAN	O15067	NA	NA	NA	9.80407	10.516	10.4375	10.5412	10.51	11.52	11.7279	11.0109	11.0643	12.2648	12.187	11.6859	12.1166
sp|O15075|DCLK1_HUMAN	O15075	NA	NA	NA	NA	NA	NA	9.87607	NA	NA	10.2874	NA	NA	12.5536	12.9737	12.801	12.8546
sp|O15091|MRPP3_HUMAN	O15091	NA	NA	NA	NA	11.5006	11.254	11.0043	11.3524	11.0366	11.3687	10.0808	10.1138	11.0441	NA	NA	NA
sp|O15118|NPC1_HUMAN	O15118	NA	NA	NA	NA	10.2653	10.0108	10.8016	10.7814	10.1667	10.1843	9.94359	10.2996	13.6459	13.7052	13.4921	13.5
sp|O15126|SCAM1_HUMAN	O15126	NA	NA	NA	NA	12.2799	12.0694	12.1099	11.9581	11.9213	11.648	11.5383	11.6378	13.5675	13.0578	13.1445	13.0775
sp|O15127|SCAM2_HUMAN	O15127	NA	NA	NA	NA	11.5462	11.5831	11.6523	11.061	NA	NA	11.2548	NA	11.0851	11.0912	NA	NA
sp|O15143|ARC1B_HUMAN	O15143	12.2387	13.0243	12.4849	12.1185	12.0925	12.4999	12.6161	12.6203	12.3923	11.4365	12.2628	12.5511	13.0023	12.6667	11.7327	12.7691
sp|O15144|ARPC2_HUMAN	O15144	12.0562	12.1585	12.3738	12.0322	13.0664	12.8436	12.3617	12.8869	12.5821	12.4696	12.7273	12.5816	12.6827	13.0602	12.8705	13.1268
sp|O15145|ARPC3_HUMAN	O15145	13.8713	14.0369	13.9951	14.0328	14.6181	14.4614	14.6377	14.6293	14.1796	14.2757	14.3687	14.229	14.8274	14.7033	14.6667	14.5363
sp|O15160|RPAC1_HUMAN	O15160	12.4865	12.5901	11.3597	11.277	12.2987	11.5305	11.8948	NA	NA	11.6849	11.5079	11.5437	NA	12.4961	12.0569	11.9946
sp|O15162|PLS1_HUMAN	O15162	NA	NA	NA	NA	NA	NA	11.2612	NA	11.7903	11.8116	11.9286	11.9277	11.8602	11.6497	11.4372	11.4913
sp|O15173|PGRC2_HUMAN	O15173	NA	NA	NA	NA	13.6044	13.5103	13.7303	13.6541	13.7611	14.0675	13.9291	13.8177	12.4364	12.4903	12.3364	12.025
sp|O15212|PFD6_HUMAN	O15212	NA	NA	NA	NA	12.2109	11.61	11.4477	11.7913	11.3785	12.9312	12.7176	12.8535	12.5232	12.7465	12.7952	12.6709
sp|O15230|LAMA5_HUMAN	O15230	15.531	15.5042	15.3108	15.413	10.7928	11.1554	11.752	11.231	10.2558	9.99748	10.0752	11.2999	8.63083	7.1604	8.721	7.77822
sp|O15235|RT12_HUMAN	O15235	8.94455	NA	NA	NA	9.49664	NA	10.9956	10.7701	9.63273	NA	9.74842	NA	NA	9.78061	10.8503	10.4579
sp|O15243|OBRG_HUMAN	O15243	NA	NA	NA	9.4319	11.0219	11.1359	11.0928	11.0298	NA	10.3001	NA	10.4072	10.9589	11.2113	11.141	10.6914
sp|O15258|RER1_HUMAN	O15258	13.4119	13.3843	13.1428	13.0923	13.7894	14.0091	14.0048	13.9023	12.389	13.3475	13.043	13.0261	12.1842	13.2439	13.4484	13.4122
sp|O15260|SURF4_HUMAN	O15260	10.7017	10.1813	10.6284	10.6199	13.707	13.3437	13.5407	13.483	13.7347	13.9387	13.8591	13.2784	13.9977	14.4761	14.2444	14.4694
sp|O15269|SPTC1_HUMAN	O15269	NA	NA	NA	NA	12.405	12.4728	12.5863	12.2843	12.4774	11.7911	11.453	11.8473	12.7951	12.592	12.5316	12.4789
sp|O15305|PMM2_HUMAN	O15305	10.4792	NA	NA	NA	12.3297	NA	12.4932	12.1082	12.8364	12.7698	12.7976	12.0516	11.7715	11.091	10.6523	10.955
sp|O15321|TM9S1_HUMAN	O15321	NA	NA	NA	NA	13.8993	NA	13.9211	13.7979	13.4356	13.292	NA	NA	11.9406	14.0167	12.088	13.8188
sp|O15344|TRI18_HUMAN	O15344	NA	NA	NA	NA	NA	NA	NA	NA	NA	NA	NA	11.6229	10.9126	11.1622	NA	NA
sp|O15355|PPM1G_HUMAN	O15355	NA	NA	9.60637	NA	9.89537	11.206	10.3999	11.1825	11.9681	11.4771	11.6238	NA	12.8679	12.7472	12.8296	12.4095
sp|O15371|EIF3D_HUMAN	O15371	8.95898	9.6739	9.9397	9.18071	11.7026	11.8357	11.9165	11.7617	12.8162	12.6213	12.6703	12.735	13.0278	13.0087	12.9866	12.7792
sp|O15372|EIF3H_HUMAN	O15372	9.99542	9.90517	9.8213	NA	11.6981	11.4337	11.1601	11.4245	12.0565	12.4832	12.6212	11.5817	12.8456	12.896	13.3612	13.4155
sp|O15382|BCAT2_HUMAN	O15382	NA	NA	NA	NA	12.6637	11.9491	12.3269	12.1767	11.6491	11.2697	11.8227	11.5015	NA	NA	NA	NA
sp|O15400|STX7_HUMAN	O15400	NA	NA	NA	NA	12.5121	12.0895	12.136	12.3251	12.0341	12.0425	12.1652	11.7175	12.8668	12.6674	12.4223	12.4663
sp|O15427|MOT4_HUMAN	O15427	12.5335	12.495	11.8104	12.4038	12.633	12.7915	12.6611	12.7039	13.2207	13.9377	13.8249	13.9487	13.5491	13.9186	13.9798	14.0153
sp|O15439|MRP4_HUMAN	O15439	NA	NA	NA	NA	NA	NA	NA	10.3673	12.6068	12.5598	12.6194	12.4639	11.2492	11.158	11.4271	10.6488
sp|O15460|P4HA2_HUMAN	O15460	NA	9.77086	9.25129	9.45991	10.6111	10.5554	10.8297	11.0175	11.8796	11.8487	11.7308	11.2254	13.3218	13.3625	13.0211	13.0832
sp|O15498|YKT6_HUMAN	O15498	NA	NA	NA	NA	12.9201	12.957	11.8978	12.4661	12.0563	NA	11.6403	12.4087	11.4932	12.0077	NA	12.1019
sp|O15511|ARPC5_HUMAN	O15511	13.7203	13.9721	13.7103	13.3108	13.7846	13.9443	13.9114	13.9062	13.8427	13.8297	13.8282	13.8111	14.0791	13.9854	13.9126	13.7876
sp|O15523|DDX3Y_HUMAN	O15523	NA	NA	NA	NA	NA	NA	NA	12.9122	13.8019	NA	13.1566	NA	NA	NA	13.3421	NA
sp|O15533|TPSN_HUMAN	O15533	NA	NA	NA	NA	12.6747	13.8214	13.7323	13.8891	NA	11.8309	11.6018	12.0412	12.3601	NA	12.2103	11.4129
sp|O15554|KCNN4_HUMAN	O15554	NA	NA	NA	NA	NA	NA	NA	NA	NA	NA	NA	NA	12.3905	12.3789	12.4088	12.4665
sp|O43143|DHX15_HUMAN	O43143	NA	NA	10.1432	NA	12.2926	10.8914	11.5426	11.6813	12.6981	12.7118	12.627	11.949	13.5172	13.2561	13.3309	13.1738
sp|O43148|MCES_HUMAN	O43148	NA	NA	NA	NA	9.45139	10.1696	9.54087	NA	11.2656	10.5411	10.5041	10.4497	12.7114	12.1949	12.4918	12.2252
sp|O43159|RRP8_HUMAN	O43159	NA	NA	NA	NA	NA	9.45476	NA	9.20148	NA	9.97811	NA	9.94402	11.1766	10.6801	NA	10.6039
sp|O43164|PJA2_HUMAN	O43164	NA	NA	NA	NA	NA	NA	NA	NA	NA	NA	NA	NA	9.75627	10.0259	NA	9.91416
sp|O43169|CYB5B_HUMAN	O43169	12.3652	12.5162	12.3092	12.0726	13.932	13.7917	13.8569	13.9038	13.8998	14.0249	13.8386	13.9104	14.6905	14.6682	14.6333	14.7194
sp|O43172|PRP4_HUMAN	O43172	NA	NA	NA	NA	11.5677	11.7612	11.757	11.6438	NA	NA	NA	NA	NA	NA	12.7463	12.6274
sp|O43175|SERA_HUMAN	O43175	8.72944	8.40265	9.23209	8.64234	11.5676	11.2148	11.3703	11.3051	13.794	13.7062	13.5924	13.1216	14.3955	14.3376	14.1917	14.0872
sp|O43181|NDUS4_HUMAN	O43181	NA	NA	NA	NA	NA	NA	NA	NA	12.9538	13.0476	12.6336	12.3443	NA	12.1387	12.0463	NA
sp|O43237|DC1L2_HUMAN	O43237	10.7294	10.6536	10.4371	10.2458	12.7321	12.4229	12.804	12.6632	13.1947	13.1349	13.1427	13.1656	13.3622	13.0416	12.7545	12.9356
sp|O43242|PSMD3_HUMAN	O43242	11.4231	11.1863	11.4246	11.1947	12.8026	12.8929	12.7823	12.8165	13.124	13.1496	13.2069	13.0682	13.6016	13.5394	13.4852	13.3642
sp|O43252|PAPS1_HUMAN	O43252	NA	NA	NA	NA	10.3536	10.283	9.8889	10.5097	NA	10.0787	10.3954	NA	10.3514	10.4002	10.0265	10.6182
sp|O43264|ZW10_HUMAN	O43264	NA	NA	NA	NA	11.71	11.5751	11.6411	11.6128	11.4256	11.8115	11.9845	11.4492	11.9271	11.6589	11.8315	11.4214
sp|O43290|SNUT1_HUMAN	O43290	NA	NA	NA	NA	10.7467	10.6571	11.0373	10.8564	12.0328	11.9485	11.9996	11.863	12.6051	12.5146	12.3819	12.2615
sp|O43292|GPAA1_HUMAN	O43292	NA	NA	NA	NA	11.6993	10.8914	11.4573	11.4876	10.6722	11.3814	11.4526	10.5709	12.2998	12.2082	11.31	11.8929
sp|O43294|TGFI1_HUMAN	O43294	NA	NA	NA	NA	10.8358	11.1435	10.8693	10.7025	13.0607	12.8574	12.8748	12.0972	NA	NA	10.1635	10.5925
sp|O43301|HS12A_HUMAN	O43301	NA	NA	NA	NA	11.5593	11.5538	11.7122	11.6328	11.5366	11.1203	11.0884	11.4928	11.7605	11.4349	11.7006	11.539
sp|O43310|CTIF_HUMAN	O43310	NA	NA	NA	NA	11.2423	NA	11.5914	11.4286	NA	NA	NA	NA	NA	NA	NA	NA
sp|O43324|MCA3_HUMAN	O43324	14.4703	14.4656	14.1861	14.4355	13.9738	14.0927	14.2337	13.9963	13.3248	13.5371	13.6059	13.4959	13.5911	13.3267	13.514	13.528
sp|O43390|HNRPR_HUMAN	O43390	11.804	11.4541	11.3897	11.228	12.542	12.4721	12.3463	12.4233	14.2625	14.0701	13.9868	13.9081	14.4315	14.1382	14.0879	13.9583
sp|O43395|PRPF3_HUMAN	O43395	10.68	NA	10.7808	11.0519	10.282	10.4781	10.5814	10.5681	11.7743	11.56	11.5921	12.6959	11.8182	12.3627	11.7552	12.1527
sp|O43396|TXNL1_HUMAN	O43396	10.5309	10.3063	10.2023	10.1536	11.8658	11.8043	11.9474	10.5766	12.5037	12.3294	12.2784	12.6805	12.0477	11.9786	11.4203	11.5696
sp|O43399|TPD54_HUMAN	O43399	10.9958	10.5266	10.3527	10.0695	14.5408	14.6574	14.5938	14.4454	13.8759	13.9616	13.8614	14.0385	14.718	14.7046	14.6257	14.4756
sp|O43432|IF4G3_HUMAN	O43432	NA	9.91234	9.9082	9.18796	11.8901	12.208	11.6079	12.0321	12.013	12.1482	12.3844	12.5107	12.2832	12.5322	11.7349	12.2384
sp|O43447|PPIH_HUMAN	O43447	NA	NA	NA	NA	NA	NA	NA	NA	12.4916	NA	NA	NA	13.218	12.9924	12.8772	12.8509
sp|O43488|ARK72_HUMAN	O43488	NA	NA	9.9901	NA	11.7897	NA	9.87451	NA	12.8402	12.8153	12.6377	12.5429	13.4557	13.409	13.2975	13.0414
sp|O43491|E41L2_HUMAN	O43491	NA	NA	NA	NA	12.6077	12.3255	12.9263	12.714	12.3007	12.4654	12.4705	11.7502	11.4704	11.2264	11.6256	11.476
sp|O43493|TGON2_HUMAN	O43493	NA	NA	NA	7.56321	10.9075	10.8333	10.5242	9.94146	9.39658	9.4467	10.2826	10.2313	10.0925	11.0629	11.6306	11.6177
sp|O43570|CAH12_HUMAN	O43570	NA	NA	NA	NA	NA	NA	NA	NA	NA	NA	NA	NA	12.9874	12.8224	12.9104	12.6988
sp|O43583|DENR_HUMAN	O43583	NA	NA	NA	NA	10.8986	11.1917	11.2227	11.4114	12.1865	12.0176	12.1431	11.9277	12.1406	12.2296	12.0196	11.985
sp|O43592|XPOT_HUMAN	O43592	NA	NA	NA	NA	11.7317	11.4716	11.7083	11.5542	11.9267	11.8826	11.9276	11.433	13.0802	13.1117	13.0852	12.9543
sp|O43615|TIM44_HUMAN	O43615	NA	9.93025	10.5616	9.83184	12.1779	12.5456	11.334	12.2987	12.5855	13.0285	12.7759	12.2919	12.7112	12.3571	12.0757	12.0714
sp|O43617|TPPC3_HUMAN	O43617	NA	10.2698	10.2936	10.3039	11.9345	10.2705	10.5618	10.5059	12.3386	12.0933	12.1843	11.914	12.6645	11.7898	12.1631	12.1591
sp|O43633|CHM2A_HUMAN	O43633	13.4469	13.0537	13.2541	13.1064	13.4132	13.4048	13.5281	13.5525	13.6816	13.4124	13.466	13.5149	13.8759	13.9681	14.0196	13.7295
sp|O43657|TSN6_HUMAN	O43657	NA	NA	NA	NA	NA	NA	12.1658	NA	12.3294	12.285	12.4258	11.9031	NA	NA	NA	NA
sp|O43670|ZN207_HUMAN	O43670	NA	NA	NA	NA	10.4825	11.3357	11.611	11.296	11.6716	12.1129	13.0794	12.9441	11.9696	11.6908	13.3475	13.5875
sp|O43674|NDUB5_HUMAN	O43674	12.575	12.3767	12.7548	12.6239	NA	12.3655	12.2226	12.4458	13.181	13.42	13.4471	13.3966	12.3467	12.1964	13.2127	13.221
sp|O43676|NDUB3_HUMAN	O43676	NA	12.7137	12.5718	12.8347	12.4735	12.5958	13.0606	12.406	13.8563	13.5624	13.7677	14.0118	13.2624	13.1457	12.5817	12.6661
sp|O43678|NDUA2_HUMAN	O43678	11.2682	11.8305	NA	11.2633	12.1548	NA	NA	12.2028	13.7641	13.7557	13.6826	14.0456	13.036	NA	12.8593	NA
sp|O43681|GET3_HUMAN	O43681	NA	NA	8.95806	9.97923	10.7707	10.6924	10.8293	10.4172	11.5801	12.4579	10.8107	12.1303	13.0905	12.3848	11.7511	11.4732
sp|O43684|BUB3_HUMAN	O43684	NA	NA	10.0981	NA	11.7235	12.0283	11.7246	11.8046	12.6047	12.7591	12.4719	12.2412	13.0317	13.2033	13.0546	12.8568
sp|O43707|ACTN4_HUMAN	O43707	9.13467	8.88291	9.50809	8.13179	14.0913	14.1275	14.1297	14.1034	13.4867	13.5264	13.4096	13.2931	13.6093	13.5192	13.4679	13.3298
sp|O43731|ERD23_HUMAN	O43731	12.4454	12.443	11.8617	12.3472	12.5677	12.2674	12.288	12.2985	NA	11.9406	11.5566	11.5244	NA	11.7028	NA	NA
sp|O43747|AP1G1_HUMAN	O43747	8.66154	9.53872	8.89253	9.21901	12.2349	11.8776	11.9476	11.9733	10.7057	11.3332	11.2844	11.2857	11.7643	11.5782	11.8001	11.809
sp|O43765|SGTA_HUMAN	O43765	NA	NA	NA	NA	11.7089	11.9669	11.7725	11.1762	12.4094	12.2938	12.0022	12.3475	12.6518	12.7521	12.5411	12.2836
sp|O43772|MCAT_HUMAN	O43772	NA	NA	10.3739	10.5442	11.3656	10.5892	11.1227	11.4434	11.481	10.7977	10.8515	11.6274	11.4803	12.0832	11.6292	12.0955
sp|O43776|SYNC_HUMAN	O43776	10.486	10.395	11.0717	10.3551	12.7763	12.8982	13.2043	12.9311	13.4446	13.5603	13.4403	13.2718	13.825	13.6872	13.4138	13.7257
sp|O43795|MYO1B_HUMAN	O43795	12.9718	13.3255	13.1217	12.9609	12.2542	12.4303	12.3002	12.3932	11.7445	11.4421	11.5974	11.2426	12.2246	11.7993	12.2548	12.1508
sp|O43809|CPSF5_HUMAN	O43809	NA	NA	NA	NA	11.3973	NA	10.8646	NA	12.6777	13.4011	13.1263	12.5814	12.8201	12.5945	12.6794	13.0977
sp|O43813|LANC1_HUMAN	O43813	NA	11.489	NA	NA	13.6733	12.6377	13.6325	13.7367	13.2359	12.8506	13.2074	12.5222	12.571	12.7456	12.6501	12.4486
sp|O43815|STRN_HUMAN	O43815	NA	NA	NA	NA	NA	NA	11.1666	NA	11.5458	11.2085	11.4562	11.4327	11.7622	11.5767	10.9605	12.0774
sp|O43818|U3IP2_HUMAN	O43818	NA	NA	NA	NA	NA	NA	NA	NA	NA	10.4046	10.6796	NA	11.1574	10.9143	11.1012	11.2666
sp|O43819|SCO2_HUMAN	O43819	NA	NA	NA	11.2674	NA	NA	NA	NA	NA	12.3012	NA	NA	13.4779	13.2944	13.537	NA
sp|O43837|IDH3B_HUMAN	O43837	NA	9.64377	9.2604	9.10896	10.52	10.073	9.71263	10.467	10.6277	10.4341	10.2215	11.034	11.983	11.5972	12.0822	11.8985
sp|O43847|NRDC_HUMAN	O43847	NA	NA	NA	NA	10.3196	9.99667	10.7469	9.10984	9.88235	9.54132	9.0022	10.3944	10.5791	10.0623	9.08952	9.99071
sp|O43852|CALU_HUMAN	O43852	10.1937	9.92128	9.30736	9.52894	13.6787	13.6561	13.4552	13.608	13.7036	13.6909	13.3894	13.1537	14.1698	14.2227	14.2104	14.0655
sp|O43854|EDIL3_HUMAN	O43854	13.256	13.3778	13.0983	13.2787	10.4763	NA	10.5489	10.2919	NA	NA	NA	NA	11.4578	11.5295	10.9814	10.882
sp|O43865|SAHH2_HUMAN	O43865	NA	NA	NA	NA	12.1736	12.2956	11.3947	12.2503	12.0906	13.1183	12.6684	12.7335	13.9534	13.8189	13.3146	11.6354
sp|O60216|RAD21_HUMAN	O60216	13.0627	12.7045	12.425	12.7009	10.3209	10.3186	10.0289	10.0089	10.8747	11.9714	11.4807	11.8803	11.3316	10.9379	11.7721	12.0995
sp|O60256|KPRB_HUMAN	O60256	NA	NA	NA	NA	NA	NA	NA	10.7401	11.2975	11.2794	11.0443	11.3839	12.3689	12.4453	11.8312	12.0798
sp|O60264|SMCA5_HUMAN	O60264	12.0211	12.1089	NA	11.8484	NA	NA	10.9914	10.94	12.6625	12.7187	12.6509	11.836	10.8205	11.8278	12.0803	12.0349
sp|O60271|JIP4_HUMAN	O60271	9.60279	9.72109	9.53658	9.52362	12.1945	11.4358	12.2065	11.8225	11.032	10.9375	10.8691	10.2205	12.5702	12.2792	12.0375	11.8575
sp|O60313|OPA1_HUMAN	O60313	9.92215	9.2086	9.60815	NA	10.4481	10.4674	10.5808	10.2753	11.2934	10.8781	10.986	10.9112	12.5809	12.5976	12.3299	12.1747
sp|O60437|PEPL_HUMAN	O60437	NA	NA	NA	NA	NA	NA	NA	NA	NA	NA	NA	NA	11.6898	11.2855	11.1789	11.0412
sp|O60443|GSDME_HUMAN	O60443	NA	9.98742	9.3432	NA	9.97944	10.3845	10.4314	10.159	11.6648	11.6437	11.0947	11.5091	13.1305	12.8003	12.4757	12.8102
sp|O60462|NRP2_HUMAN	O60462	NA	NA	NA	NA	NA	NA	NA	NA	NA	NA	NA	NA	12.0265	11.9563	11.7967	11.4445
sp|O60488|ACSL4_HUMAN	O60488	9.57853	9.82605	9.03255	9.91278	10.9388	10.7726	10.749	11.0381	9.89427	10.3381	9.86768	10.3616	13.8274	13.7247	13.546	13.5479
sp|O60493|SNX3_HUMAN	O60493	12.5675	12.4694	12.5295	12.5028	14.3893	14.5154	14.5516	14.427	13.7337	13.529	13.2156	13.5103	13.6508	13.2698	13.3021	12.9712
sp|O60502|OGA_HUMAN	O60502	NA	NA	NA	NA	11.8401	12.0549	12.2462	11.9573	12.2626	12.394	12.1733	12.0112	12.7027	12.5172	12.227	12.3472
sp|O60506|HNRPQ_HUMAN	O60506	10.9819	9.74096	9.93665	10.4856	13.1948	13.4527	13.3502	13.425	14.8281	14.8192	14.6858	14.3635	14.713	14.4284	14.5041	14.3599
sp|O60518|RNBP6_HUMAN	O60518	NA	NA	NA	NA	13.0096	12.7043	12.6382	12.7787	12.8314	12.748	12.6174	12.2808	13.811	13.7124	13.7191	13.6662
sp|O60568|PLOD3_HUMAN	O60568	10.038	10.1358	10.3559	9.95104	12.2315	12.318	12.3621	12.3587	12.8688	12.8052	12.687	12.9534	11.5704	11.0131	11.0395	10.8632
sp|O60610|DIAP1_HUMAN	O60610	NA	NA	NA	NA	10.2194	10.4966	11.0681	10.543	10.8834	10.4356	10.6853	10.827	12.4244	12.1333	12.03	11.9092
sp|O60613|SEP15_HUMAN	O60613	NA	NA	NA	NA	12.2225	12.0471	12.3148	12.3484	11.6883	12.1932	12.2384	12.4451	NA	NA	NA	NA
sp|O60645|EXOC3_HUMAN	O60645	NA	9.46951	NA	NA	11.2332	10.8434	10.7481	11.4006	10.7344	10.5699	10.8343	10.4103	11.4202	11.182	11.3759	11.4999
sp|O60664|PLIN3_HUMAN	O60664	10.6059	9.97299	9.83209	9.87511	13.9917	13.9986	13.9487	13.9054	14.0477	13.9462	13.796	13.9832	14.8722	14.8547	14.7372	14.7246
sp|O60678|ANM3_HUMAN	O60678	NA	NA	NA	NA	10.9264	NA	10.9737	10.5718	10.4016	10.5213	10.8323	NA	11.4401	11.6225	11.0576	11.4389
sp|O60684|IMA7_HUMAN	O60684	9.75684	NA	10.0231	NA	12.0514	11.3445	11.7165	11.8518	12.3574	11.8533	11.6025	12.1401	12.8975	12.3989	12.9957	12.5071
sp|O60687|SRPX2_HUMAN	O60687	12.3445	11.4122	12.214	11.9023	12.6198	12.626	12.4773	12.7842	NA	NA	10.9031	10.4042	NA	NA	NA	NA
sp|O60701|UGDH_HUMAN	O60701	11.4885	10.6505	11.4546	10.9715	13.7856	13.6513	13.7049	13.7908	13.7674	13.8044	13.5206	13.5257	13.2336	13.1464	13.024	12.9277
sp|O60711|LPXN_HUMAN	O60711	NA	NA	NA	NA	NA	NA	NA	NA	NA	NA	NA	NA	12.6983	13.1074	12.966	12.8517
sp|O60716|CTND1_HUMAN	O60716	9.96407	10.7497	10.0417	NA	11.7726	11.6274	11.6689	11.9718	12.3255	12.2155	12.2056	11.8115	12.9988	12.6649	12.4417	12.2006
sp|O60749|SNX2_HUMAN	O60749	10.9986	10.6431	11.0458	10.5175	12.5678	12.7222	12.9142	12.7959	12.9185	12.7878	12.8059	12.7643	13.4611	13.2241	13.1619	13.1108
sp|O60762|DPM1_HUMAN	O60762	10.4271	10.5651	10.2714	10.1192	12.1321	12.194	11.9383	12.3583	11.6217	11.6311	11.2075	11.9544	12.9816	12.8631	12.8245	12.9598
sp|O60763|USO1_HUMAN	O60763	8.95263	10.2246	8.62813	9.17624	13.0025	13.1226	13.0134	12.9939	13.305	13.2307	13.0232	13.1349	12.3853	12.222	12.3385	12.198
sp|O60783|RT14_HUMAN	O60783	11.5619	NA	12.1824	NA	NA	NA	NA	12.3579	12.4013	12.351	12.1617	12.3039	12.3398	12.1665	12.3017	11.6744
sp|O60784|TOM1_HUMAN	O60784	NA	NA	NA	NA	11.5997	11.3583	11.6384	11.5255	11.4853	11.3226	10.8553	10.6052	12.0306	12.059	11.7941	11.3524
sp|O60826|CCD22_HUMAN	O60826	NA	NA	NA	NA	11.6067	11.0332	11.1935	11.4796	10.6567	NA	NA	NA	11.6187	11.5069	11.3931	11.2051
sp|O60831|PRAF2_HUMAN	O60831	11.8035	11.9666	11.7509	11.6271	12.885	13.1192	13.6072	12.9792	13.4242	13.1463	12.7242	13.5674	13.0873	12.4078	12.4754	12.426
sp|O60832|DKC1_HUMAN	O60832	10.5375	11.5415	11.315	11.2258	12.0984	11.7621	11.192	12.0646	12.8267	12.8052	12.7169	12.6901	12.9933	13.0854	12.7995	12.676
sp|O60841|IF2P_HUMAN	O60841	NA	8.92098	NA	8.88113	12.0503	11.9441	11.9279	12.0523	12.3361	12.4244	12.4	12.0923	12.7886	12.5462	12.3898	12.5022
sp|O60869|EDF1_HUMAN	O60869	NA	NA	NA	NA	12.1864	12.1797	12.2782	12.1917	12.695	12.6224	12.3351	13.0001	12.6828	12.907	13.1012	13.0049
sp|O60879|DIAP2_HUMAN	O60879	NA	NA	NA	NA	11.5565	10.4408	11.3211	11.1408	10.5503	10.8698	10.4875	11.2096	10.3823	10.4099	10.8062	10.2258
sp|O60884|DNJA2_HUMAN	O60884	11.3697	11.2701	11.2245	NA	11.8189	11.8803	12.1465	11.47	12.6664	12.5146	12.545	12.0904	13.0468	12.8194	12.7815	12.6323
sp|O60888|CUTA_HUMAN	O60888	NA	NA	NA	NA	11.9702	NA	NA	NA	11.1585	12.6337	12.2047	11.4281	12.6567	12.7583	12.5207	13.1253
sp|O60925|PFD1_HUMAN	O60925	NA	NA	NA	NA	NA	NA	NA	NA	NA	NA	NA	12.2958	12.1809	12.621	NA	12.6203
sp|O60936|NOL3_HUMAN	O60936	NA	NA	NA	NA	NA	NA	NA	NA	9.02195	NA	NA	NA	10.9862	11.0713	11.4637	11.9599
sp|O75027|ABCB7_HUMAN	O75027	NA	NA	NA	NA	NA	NA	NA	NA	NA	NA	NA	NA	9.73505	NA	10.1079	10.738
sp|O75083|WDR1_HUMAN	O75083	10.7395	10.9011	11.0063	10.3764	14.5563	14.6037	14.5885	14.5591	13.2011	12.9555	12.9233	13.0655	13.2915	13.2259	13.1264	13.0544
sp|O75084|FZD7_HUMAN	O75084	NA	NA	NA	NA	NA	NA	NA	NA	13.5762	13.1987	13.3463	12.8037	NA	NA	NA	NA
sp|O75116|ROCK2_HUMAN	O75116	10.1085	9.11559	9.96848	8.90453	11.5716	11.8528	11.9284	11.7442	12.771	12.9151	12.7176	12.7581	11.6903	11.3526	11.478	10.9938
sp|O75131|CPNE3_HUMAN	O75131	9.42126	10.3818	10.8426	10.655	12.393	12.308	12.5837	12.3436	12.626	12.3208	12.1855	12.2919	13.9869	14.1128	13.9703	13.8629
sp|O75153|CLU_HUMAN	O75153	NA	NA	NA	NA	NA	10.2545	NA	NA	11.2245	9.95826	10.9362	10.2991	11.8986	11.159	11.2078	11.4776
sp|O75165|DJC13_HUMAN	O75165	9.6536	9.67571	9.76294	9.7543	11.3719	11.6756	11.7055	11.6576	12.1921	12.2637	12.2948	12.1108	12.5125	12.2374	12.4083	12.1928
sp|O75223|GGCT_HUMAN	O75223	NA	NA	NA	NA	11.5904	11.579	11.4824	11.5807	12.8827	12.2224	NA	12.5133	11.2556	11.0138	10.8344	10.9859
sp|O75251|NDUS7_HUMAN	O75251	10.8112	10.9159	11.3279	11.4218	13.4842	13.1958	13.262	13.2169	13.4385	13.2573	13.2344	13.3958	13.9621	13.4976	13.5611	13.4093
sp|O75306|NDUS2_HUMAN	O75306	NA	10.5122	NA	11.273	12.66	11.8917	12.6045	12.5503	12.6947	12.129	10.6402	12.114	13.1539	13.2954	12.9097	13.2198
sp|O75312|ZPR1_HUMAN	O75312	NA	NA	NA	NA	NA	NA	NA	NA	12.4341	NA	12.0251	NA	12.1159	11.8159	11.796	11.5791
sp|O75323|NIPS2_HUMAN	O75323	NA	NA	NA	NA	12.8691	13.0238	13.2508	13.1207	13.177	NA	13.2085	13.1502	13.0885	12.9249	12.9117	12.6457
sp|O75326|SEM7A_HUMAN	O75326	NA	10.4996	10.5091	10.6346	11.3236	10.6833	10.4236	11.2726	NA	NA	NA	NA	12.0663	12.2799	12.0746	12.2877
sp|O75340|PDCD6_HUMAN	O75340	NA	NA	NA	NA	12.2098	12.0114	12.35	12.0957	12.7113	12.6606	12.6795	12.1229	13.4512	13.3521	13.2971	13.0787
sp|O75347|TBCA_HUMAN	O75347	NA	NA	NA	NA	12.1926	12.0147	12.1346	12.0566	12.9846	12.6825	12.7805	12.0213	13.5597	13.4497	13.4013	13.4199
sp|O75348|VATG1_HUMAN	O75348	11.0205	NA	11.3877	NA	13.9642	13.9902	14.1209	14.0118	14.5664	14.4993	14.4332	14.3831	15.0734	15.0942	14.9004	14.8749
sp|O75351|VPS4B_HUMAN	O75351	NA	NA	NA	NA	11.6535	11.5352	11.6768	11.8376	12.5422	12.1787	12.1768	12.3689	11.1392	11.1178	11.1244	10.5758
sp|O75352|MPU1_HUMAN	O75352	10.3755	10.4068	10.2036	10.5255	13.2261	13.2323	13.1789	13.2656	13.2189	13.3475	13.0856	13.0365	13.0764	13.0767	13.0415	13.0714
sp|O75367|H2AY_HUMAN	O75367	16.0614	15.8084	16.2266	16.322	12.1012	12.4433	12.6644	12.3915	13.6903	13.5451	13.5481	13.8863	14.4999	14.3339	14.437	14.3068
sp|O75368|SH3L1_HUMAN	O75368	NA	10.6958	NA	NA	13.0294	12.9524	12.8764	12.9889	12.8195	13.0345	12.976	13.1542	13.0858	13.0027	12.6761	13.0641
sp|O75369|FLNB_HUMAN	O75369	9.63857	8.60564	9.22082	9.45177	12.0242	12.0527	12.1103	12.1041	12.6002	12.6972	12.6999	12.7951	13.3666	12.9676	13.0993	12.8742
sp|O75381|PEX14_HUMAN	O75381	NA	NA	NA	NA	10.3408	10.2649	10.5397	9.91706	9.88629	NA	NA	NA	9.72053	9.51941	9.67089	NA
sp|O75390|CISY_HUMAN	O75390	10.7419	10.5831	10.853	10.7455	12.6561	12.8339	12.77	12.8818	13.053	13.199	13.1916	13.2421	14.2946	14.198	14.0621	14.1155
sp|O75396|SC22B_HUMAN	O75396	11.4304	11.0016	10.8886	11.2751	14.6996	14.7672	14.9276	14.6091	14.6693	14.4521	14.5412	14.4484	15.169	15.0056	14.8849	14.8565
sp|O75400|PR40A_HUMAN	O75400	NA	NA	NA	NA	10.5529	10.1068	10.4399	NA	NA	11.5077	10.582	NA	11.761	10.5721	11.6717	10.4637
sp|O75410|TACC1_HUMAN	O75410	NA	NA	NA	NA	10.7546	10.9251	10.6508	10.8223	11.9188	11.0578	10.9726	11.6648	11.396	NA	9.92097	11.1296
sp|O75431|MTX2_HUMAN	O75431	NA	10.0535	11.2418	NA	10.5244	10.2555	10.3159	10.079	11.4238	12.198	11.9199	11.6208	13.0533	12.6039	12.6365	12.6938
sp|O75436|VP26A_HUMAN	O75436	10.302	10.7706	10.8408	10.6953	12.8189	12.6723	12.607	12.701	12.7501	12.8795	12.7831	12.539	13.7078	13.6276	13.6863	13.4995
sp|O75438|NDUB1_HUMAN	O75438	10.0617	10.019	10.2384	NA	10.8013	11.8714	10.8738	11.8916	NA	11.8368	10.9313	12.3379	12.6402	12.4641	12.4056	10.9525
sp|O75439|MPPB_HUMAN	O75439	NA	NA	NA	NA	12.3621	12.3979	12.7606	12.5558	11.8044	12.0016	12.1799	12.7473	11.7187	11.838	11.6759	11.7149
sp|O75475|PSIP1_HUMAN	O75475	13.5005	13.4103	13.2955	13.4404	NA	NA	10.5451	NA	12.7378	12.4937	13.0082	12.2672	12.951	13.0278	12.9285	12.9578
sp|O75477|ERLN1_HUMAN	O75477	12.4528	12.1236	12.4123	12.4993	13.3555	13.0966	13.45	13.343	13.0557	13.0957	13.1057	13.0861	13.9204	13.6583	13.7144	13.3272
sp|O75489|NDUS3_HUMAN	O75489	11.296	11.1466	11.1757	11.1727	12.6825	12.6338	12.7172	12.4509	12.9592	12.5306	13.1182	12.9504	13.2017	13.1869	13.2996	13.1312
sp|O75506|HSBP1_HUMAN	O75506	NA	NA	NA	NA	NA	NA	NA	NA	10.9073	11.3778	10.4286	11.2628	12.496	12.2139	12.2177	10.9778
sp|O75521|ECI2_HUMAN	O75521	NA	NA	NA	NA	12.7009	12.8282	12.9983	12.7467	11.6553	10.9089	NA	11.201	11.1049	10.6415	11.2538	10.9024
sp|O75525|KHDR3_HUMAN	O75525	13.2285	13.296	12.9518	13.1068	11.7264	11.5208	12.1974	11.75	NA	NA	NA	NA	11.7479	11.5014	11.8369	11.5381
sp|O75531|BAF_HUMAN	O75531	15.3879	14.993	15.1467	15.7657	12.418	12.5433	12.0675	12.3021	13.8791	14.1362	13.5328	13.2016	15.2656	15.2804	15.1784	15.278
sp|O75533|SF3B1_HUMAN	O75533	9.93325	10.2468	9.74923	10.2109	11.4233	10.6589	11.0858	11.088	11.9344	11.9858	11.7686	11.584	12.4366	12.6563	12.4742	12.4679
sp|O75534|CSDE1_HUMAN	O75534	NA	NA	NA	NA	12.5983	12.6044	12.6219	12.4376	12.649	12.7089	12.6416	12.4847	13.5511	13.5253	13.4336	13.2432
sp|O75569|PRKRA_HUMAN	O75569	9.15296	9.35489	9.29532	9.01411	9.7505	10.6592	11.2833	11.459	11.0188	11.0858	10.4363	11.2833	10.9088	10.7206	10.7345	9.75702
sp|O75592|MYCB2_HUMAN	O75592	NA	NA	NA	NA	11.0425	10.714	NA	10.4378	10.9189	10.6834	10.296	NA	11.1346	10.9188	11.2749	NA
sp|O75607|NPM3_HUMAN	O75607	NA	NA	NA	7.88082	11.1499	11.4213	10.7991	11.1531	12.0507	12.1835	12.2727	12.2385	12.6622	12.5954	12.5218	12.4248
sp|O75608|LYPA1_HUMAN	O75608	NA	NA	11.4022	NA	12.3799	12.757	12.4677	12.811	13.0492	13.2191	13.0556	12.8971	13.4256	13.3344	NA	12.9479
sp|O75616|ERAL1_HUMAN	O75616	NA	NA	NA	NA	NA	NA	NA	NA	NA	NA	NA	NA	10.0831	10.3036	NA	9.76051
sp|O75643|U520_HUMAN	O75643	9.41106	10.2861	9.47358	9.26622	11.1607	11.1369	10.9408	11.1074	12.0162	12.1784	12.2045	11.6534	12.6697	12.5776	12.5369	12.5014
sp|O75663|TIPRL_HUMAN	O75663	NA	NA	NA	NA	11.8107	NA	NA	12.5853	NA	12.8868	12.4411	11.5837	12.2182	12.3584	12.5772	11.6246
sp|O75691|UTP20_HUMAN	O75691	NA	NA	NA	NA	9.91524	10.0255	9.5445	9.72045	10.233	10.4657	10.4739	10.1095	10.9468	11.2337	11.1072	11.1232
sp|O75694|NU155_HUMAN	O75694	NA	NA	9.67765	9.62487	9.74171	10.1936	10.7854	10.7963	11.5928	11.5501	11.2222	10.8183	12.4188	12.4184	12.3661	11.9848
sp|O75695|XRP2_HUMAN	O75695	NA	NA	NA	12.1307	12.5471	12.9241	11.8412	12.8472	12.0601	12.7846	12.5862	12.0428	12.1424	NA	12.0636	11.9835
sp|O75717|WDHD1_HUMAN	O75717	NA	NA	9.91486	NA	12.3233	11.4372	11.3129	11.3139	11.1794	11.7725	12.0905	11.1126	12.5979	12.5474	12.5904	12.3705
sp|O75718|CRTAP_HUMAN	O75718	11.1871	10.2096	10.5084	10.3329	12.0253	12.0226	11.6449	11.8054	12.9391	12.9703	12.7541	12.7148	11.2899	11.5912	11.311	11.5266
sp|O75746|S2512_HUMAN	O75746	10.4076	10.5946	10.7133	10.674	11.1343	11.9403	11.5945	11.8001	12.6118	12.5442	12.4305	12.5825	13.5005	13.4513	13.3628	13.1519
sp|O75821|EIF3G_HUMAN	O75821	10.6116	NA	NA	NA	11.5868	12.3257	12.1464	11.1412	11.8675	12.29	12.4735	12.917	13.0165	12.7535	12.4881	13.0171
sp|O75822|EIF3J_HUMAN	O75822	NA	NA	NA	NA	10.8138	10.7538	11.7221	10.9263	12.4099	12.1856	12.3632	11.4237	11.8229	12.0851	12.2208	12.2099
sp|O75828|CBR3_HUMAN	O75828	NA	NA	NA	NA	10.3591	11.438	9.84351	NA	10.8233	10.8508	10.7781	10.6759	12.4011	11.786	10.446	12.0407
sp|O75844|FACE1_HUMAN	O75844	NA	NA	NA	NA	11.535	11.263	11.1468	10.9117	10.8787	11.4548	10.8996	9.67841	11.6976	11.8132	11.6118	11.2626
sp|O75874|IDHC_HUMAN	O75874	10.9464	11.3166	10.6686	11.4319	13.0399	12.9645	12.9574	13.0753	14.1225	14.0543	13.9625	13.8505	14.8308	14.8642	14.8195	14.6513
sp|O75886|STAM2_HUMAN	O75886	NA	NA	NA	NA	10.5149	11.2392	11.6069	11.1718	11.1356	11.2477	11.1535	11.4876	11.4496	11.864	11.8378	11.4887
sp|O75915|PRAF3_HUMAN	O75915	12.3575	12.3968	12.1382	12.0149	15.0676	15.045	15.0669	14.9349	14.7517	14.5742	14.3528	14.6606	14.6105	14.1744	14.1914	13.9359
sp|O75934|SPF27_HUMAN	O75934	12.3159	NA	NA	NA	NA	NA	NA	NA	11.9331	NA	NA	NA	12.3145	12.2334	12.2433	12.1994
sp|O75935|DCTN3_HUMAN	O75935	10.0366	9.81868	9.46429	NA	12.3929	12.402	12.5445	12.6352	12.2086	12.5741	12.4108	12.5467	12.469	11.9647	11.4172	11.8152
sp|O75937|DNJC8_HUMAN	O75937	NA	NA	NA	NA	NA	NA	NA	NA	11.2226	12.1378	11.2591	12.1483	12.2892	11.6184	11.4248	11.4071
sp|O75947|ATP5H_HUMAN	O75947	11.1149	11.2955	10.5287	10.4477	13.5748	13.5592	13.2467	13.4112	13.6527	13.8841	13.8182	13.9332	13.6615	13.4996	13.7668	13.6074
sp|O75955|FLOT1_HUMAN	O75955	13.1265	12.8964	13.0884	13.1481	12.3997	11.9691	12.1408	11.7065	13.9754	13.9901	13.9759	14.1486	13.077	13.0102	13.2652	13.1497
sp|O75962|TRIO_HUMAN	O75962	8.70757	8.75927	8.8693	8.48652	12.1014	11.6131	11.5806	11.7074	10.5008	10.5719	10.5066	9.79354	11.1171	11.625	11.5606	11.2606
sp|O75964|ATP5L_HUMAN	O75964	13.1015	13.9486	13.891	13.729	14.0274	14.0975	14.0634	14.2043	14.249	14.2394	14.3457	14.4067	14.205	14.2575	14.1721	14.1855
sp|O75976|CBPD_HUMAN	O75976	NA	NA	NA	NA	12.0234	12.0288	12.0964	12.2065	12.0958	11.7781	11.9488	12.2611	12.4008	11.9771	11.954	11.9413
sp|O76003|GLRX3_HUMAN	O76003	NA	10.3162	9.36286	NA	12.0318	11.7649	11.7787	11.5952	12.2377	11.9108	11.8783	11.5584	13.4246	13.1701	13.1666	13.0072
sp|O76021|RL1D1_HUMAN	O76021	10.4783	10.7895	10.7961	9.86131	12.1174	12.5084	12.6553	12.5089	13.0082	13.3738	13.1153	12.589	13.581	13.5568	13.5627	13.284
sp|O76024|WFS1_HUMAN	O76024	10.903	9.38517	10.4482	8.86462	12.5214	12.7787	12.7552	12.8559	11.8526	12.0429	12.1342	11.6849	9.21348	9.46191	9.32442	8.95213
sp|O76031|CLPX_HUMAN	O76031	NA	NA	NA	NA	12.2621	12.0188	12.4897	NA	12.3945	NA	NA	NA	13.4138	12.6639	13.1762	12.9723
sp|O76074|PDE5A_HUMAN	O76074	NA	NA	NA	NA	NA	NA	NA	NA	13.1197	12.8202	12.9143	13.014	NA	NA	NA	NA
sp|O76094|SRP72_HUMAN	O76094	10.7297	10.9556	10.9361	10.4641	11.3434	11.7955	11.4609	11.4157	12.7405	12.8636	12.4258	12.5312	12.2987	12.3776	12.0927	11.7612
sp|O94760|DDAH1_HUMAN	O94760	NA	NA	NA	NA	12.2238	12.2221	11.9809	12.0062	11.0398	11.9756	12.2224	11.7217	NA	NA	NA	NA
sp|O94766|B3GA3_HUMAN	O94766	NA	11.355	11.093	11.3291	12.5509	12.3316	12.6038	12.4299	11.7476	11.855	11.7204	12.4004	12.5452	11.9024	12.6081	11.9981
sp|O94776|MTA2_HUMAN	O94776	NA	NA	NA	NA	NA	NA	NA	NA	11.2369	11.603	11.4334	NA	12.4233	11.5835	12.5647	12.3827
sp|O94804|STK10_HUMAN	O94804	NA	NA	NA	NA	11.1772	NA	NA	NA	NA	NA	11.6393	NA	12.3635	11.4343	12.1507	11.8101
sp|O94808|GFPT2_HUMAN	O94808	NA	NA	NA	NA	11.7214	11.6018	11.8652	11.9052	10.8077	10.6766	11.1723	11.019	13.9167	13.8654	13.7614	13.6734
sp|O94813|SLIT2_HUMAN	O94813	8.04816	NA	9.28984	NA	NA	NA	NA	NA	11.843	12.1767	11.863	11.3106	9.17661	9.16656	8.92043	9.31957
sp|O94822|LTN1_HUMAN	O94822	NA	NA	NA	NA	10.8571	10.5235	10.8782	10.5988	NA	11.0486	NA	NA	NA	11.6558	11.543	NA
sp|O94826|TOM70_HUMAN	O94826	10.2191	9.5328	9.3517	NA	11.8833	12.1667	12.2444	12.1131	11.8195	11.5634	11.7532	11.4108	12.8459	12.713	12.6165	12.5827
sp|O94832|MYO1D_HUMAN	O94832	NA	NA	NA	10.2613	12.7955	12.9431	13.0538	12.6822	NA	NA	NA	NA	11.9498	12.2275	12.3172	12.3109
sp|O94855|SC24D_HUMAN	O94855	NA	NA	NA	NA	12.7932	12.7296	12.4559	12.9093	12.7681	13.0165	12.8848	13.2284	11.3458	10.5517	10.8388	9.63804
sp|O94874|UFL1_HUMAN	O94874	10.1033	10.6793	10.5647	9.12216	11.9607	12.2009	11.9356	11.9586	11.9131	11.8984	11.6709	12.209	12.3271	12.269	12.1037	11.9794
sp|O94888|UBXN7_HUMAN	O94888	NA	NA	NA	NA	NA	NA	NA	NA	NA	NA	NA	NA	11.6521	11.6345	11.7451	11.4326
sp|O94901|SUN1_HUMAN	O94901	12.3417	11.6874	11.9028	11.8888	10.9608	11.031	11.1641	11.0519	12.4608	12.6569	12.6244	12.9131	11.6478	10.8351	11.8444	11.7185
sp|O94903|PLPHP_HUMAN	O94903	NA	NA	NA	NA	NA	NA	NA	NA	NA	NA	11.921	11.3718	NA	11.6636	NA	11.8551
sp|O94905|ERLN2_HUMAN	O94905	13.1232	13.3917	13.1979	13.2217	13.8943	13.8749	14.0711	13.9205	14.2064	14.184	14.0572	14.2265	14.3873	13.9601	14.2774	14.1416
sp|O94906|PRP6_HUMAN	O94906	10.2828	9.32763	10.3937	9.63285	10.0904	10.5209	9.39516	NA	11.287	11.6791	11.4781	11.2778	12.5456	12.4076	12.5791	12.3374
sp|O94907|DKK1_HUMAN	O94907	14.4594	14.4956	14.0828	14.2264	9.66071	NA	10.4797	10.8062	NA	NA	NA	NA	NA	NA	NA	11.3114
sp|O94911|ABCA8_HUMAN	O94911	NA	NA	NA	NA	11.2414	11.8845	11.7631	11.3389	11.8532	11.7766	11.7046	12.1903	NA	NA	NA	NA
sp|O94915|FRYL_HUMAN	O94915	NA	NA	NA	NA	10.713	11.1851	11.2506	11.6336	9.9776	10.1464	9.99562	NA	11.1975	11.5258	10.8247	11.5604
sp|O94919|ENDD1_HUMAN	O94919	12.661	12.9724	12.3054	12.3958	13.7937	13.7787	13.9432	13.7531	11.1653	11.1226	10.3735	11.972	11.3742	10.8242	10.8613	10.3616
sp|O94925|GLSK_HUMAN	O94925	NA	NA	NA	NA	12.2069	12.2497	11.3477	12.2501	11.0467	10.8446	10.8607	10.734	11.9584	11.102	10.8979	11.6415
sp|O94929|ABLM3_HUMAN	O94929	NA	9.50363	NA	NA	12.2718	12.4984	12.419	12.4947	10.5411	10.479	10.5811	10.7983	NA	NA	NA	NA
sp|O94973|AP2A2_HUMAN	O94973	NA	9.71803	8.55303	8.61293	11.9159	11.7637	12.1048	11.7418	12.0669	12.2677	12.0902	12.2294	12.0566	11.7608	11.9995	11.7525
sp|O94979|SC31A_HUMAN	O94979	10.2162	9.18516	9.10915	NA	12.5867	12.6258	12.6145	12.6702	12.3561	12.4512	12.3918	12.5968	11.7674	11.2832	11.4921	11.2346
sp|O95070|YIF1A_HUMAN	O95070	NA	NA	NA	NA	12.796	12.6646	13.0116	12.5178	12.6467	13.1626	12.9551	12.5712	12.4476	12.6789	12.5884	12.6653
sp|O95084|PRS23_HUMAN	O95084	14.3932	14.3997	14.1421	14.1277	NA	NA	NA	NA	NA	NA	NA	11.182	NA	NA	NA	NA
sp|O95140|MFN2_HUMAN	O95140	NA	NA	NA	NA	NA	NA	NA	NA	NA	11.3001	NA	NA	12.0578	NA	11.3733	NA
sp|O95155|UBE4B_HUMAN	O95155	NA	NA	NA	NA	9.41121	NA	NA	NA	9.92245	10.0447	NA	NA	10.909	10.7928	10.5555	10.4065
sp|O95159|ZFPL1_HUMAN	O95159	NA	NA	NA	NA	11.7496	NA	NA	NA	11.7888	11.6658	11.6827	NA	12.4714	12.103	12.1688	NA
sp|O95163|ELP1_HUMAN	O95163	NA	NA	8.31894	NA	10.1399	10.1542	9.50128	10.1338	10.144	9.0248	9.97754	9.81029	10.9269	10.3311	10.3513	9.9698
sp|O95168|NDUB4_HUMAN	O95168	12.7271	14.2089	13.5155	13.8692	12.6162	12.6768	12.7384	12.6225	12.6589	12.7628	12.6995	14.0444	12.7024	12.4507	13.4343	13.5426
sp|O95169|NDUB8_HUMAN	O95169	NA	12.4855	NA	10.8626	11.9189	10.6299	NA	NA	13.197	13.4075	13.1971	13.3739	12.411	11.9739	12.1024	12.7541
sp|O95182|NDUA7_HUMAN	O95182	11.3449	11.186	11.0291	10.7697	11.3129	11.9368	11.7951	11.4393	11.1541	11.2702	11.3485	12.3188	11.1311	11.0856	11.0278	11.3793
sp|O95183|VAMP5_HUMAN	O95183	NA	NA	NA	NA	13.9966	14.0226	14.0354	13.8721	12.5165	12.4664	11.9891	NA	12.79	12.806	12.4652	12.399
sp|O95197|RTN3_HUMAN	O95197	NA	NA	NA	NA	12.3231	12.5927	12.4876	12.4093	NA	12.2148	12.076	12.0022	12.0598	12.6794	12.9133	12.7632
sp|O95202|LETM1_HUMAN	O95202	9.74864	9.18989	9.76139	10.0126	11.5404	11.9383	11.8341	11.0937	12.0515	12.0313	12.1348	11.9204	12.6124	12.4483	12.2219	12.1321
sp|O95218|ZRAB2_HUMAN	O95218	NA	NA	NA	NA	13.2675	13.178	13.1605	13.2162	NA	NA	NA	NA	13.3515	NA	NA	NA
sp|O95219|SNX4_HUMAN	O95219	NA	NA	NA	NA	11.5208	12.1116	11.6532	11.4967	NA	NA	NA	NA	12.3904	12.6065	12.5321	12.3145
sp|O95232|LC7L3_HUMAN	O95232	NA	NA	NA	NA	9.52567	NA	10.0554	8.91248	10.0854	10.5142	10.9291	10.3892	10.2405	10.3143	10.1791	10.9245
sp|O95249|GOSR1_HUMAN	O95249	NA	NA	NA	NA	NA	NA	NA	NA	NA	NA	NA	NA	NA	11.1199	11.5168	10.9506
sp|O95292|VAPB_HUMAN	O95292	NA	NA	NA	10.3527	11.5445	11.8381	12.3947	12.0366	11.3642	11.8859	10.9392	11.4606	12.8513	12.8535	12.9215	12.8172
sp|O95295|SNAPN_HUMAN	O95295	NA	NA	NA	NA	11.5403	11.5004	11.5854	11.5316	12.1084	NA	NA	NA	12.4628	11.5867	NA	11.433
sp|O95297|MPZL1_HUMAN	O95297	NA	NA	NA	NA	12.3388	NA	12.5029	12.7991	NA	NA	NA	NA	11.8745	11.8453	NA	NA
sp|O95298|NDUC2_HUMAN	O95298	11.8323	12.3999	11.7596	NA	11.3878	11.6914	NA	11.9756	13.0765	12.7264	12.7834	12.795	12.9008	12.4598	12.4701	12.4029
sp|O95299|NDUAA_HUMAN	O95299	10.987	11.6723	11.5193	11.0741	12.7743	12.7199	13.2291	12.5669	12.2875	12.2714	12.3206	13.1429	12.6909	12.3245	12.3681	12.4031
sp|O95302|FKBP9_HUMAN	O95302	NA	NA	9.93586	NA	13.0976	11.7807	11.9038	13.1544	13.8665	13.6649	14.1227	14.1424	11.3544	11.9687	11.4585	11.7201
sp|O95336|6PGL_HUMAN	O95336	NA	NA	NA	11.2425	12.5708	12.7266	12.715	12.7104	13.2943	13.0905	13.0408	13.0236	13.7534	13.4784	13.2771	13.0399
sp|O95340|PAPS2_HUMAN	O95340	8.78923	NA	9.78002	NA	12.7163	12.5428	12.5614	12.5895	11.9409	11.6042	11.4565	11.6504	11.1323	10.2376	10.4689	10.0144
sp|O95347|SMC2_HUMAN	O95347	NA	9.68928	NA	NA	10.1383	9.99625	NA	NA	10.2351	9.94534	10.8139	10.2014	12.6421	12.6065	12.5656	12.3296
sp|O95352|ATG7_HUMAN	O95352	NA	NA	NA	NA	11.9715	11.7146	11.6322	11.8243	10.6656	11.0338	11.0415	11.0213	11.5674	11.6659	11.5463	11.6503
sp|O95372|LYPA2_HUMAN	O95372	NA	NA	NA	NA	NA	NA	NA	NA	NA	NA	NA	NA	12.4036	12.3322	12.2788	12.1326
sp|O95373|IPO7_HUMAN	O95373	8.37803	8.14285	9.69292	8.64263	11.8207	11.4864	12.1316	12.0232	11.4166	12.1562	11.7125	11.3447	12.7628	12.9446	12.9887	12.9057
sp|O95394|AGM1_HUMAN	O95394	9.56381	10.4129	9.89835	NA	12.7238	12.9736	13.0315	12.9114	12.4425	11.9174	12.0397	12.2565	11.595	11.1169	11.3162	11.3854
sp|O95425|SVIL_HUMAN	O95425	9.54187	10.1057	9.88614	9.52418	11.0869	11.4011	12.0301	11.88	10.05	10.0178	10.1186	10.4997	11.5162	11.3657	11.092	11.3829
sp|O95428|PPN_HUMAN	O95428	8.35343	NA	NA	NA	10.771	10.4038	10.5842	10.5315	NA	NA	NA	NA	NA	NA	NA	NA
sp|O95433|AHSA1_HUMAN	O95433	9.81303	9.68306	9.58321	9.65243	12.5002	12.3461	12.5058	12.4358	12.5216	12.421	12.2973	12.2026	13.7097	13.499	13.1691	13.3348
sp|O95456|PSMG1_HUMAN	O95456	NA	NA	NA	NA	11.6145	11.5237	11.6272	11.1806	NA	NA	11.2004	11.3164	12.5232	12.2978	12.9616	12.8433
sp|O95470|SGPL1_HUMAN	O95470	NA	NA	NA	NA	9.55581	11.2696	11.3618	NA	9.70486	10.8044	9.72086	10.7198	NA	NA	NA	NA
sp|O95478|NSA2_HUMAN	O95478	NA	NA	NA	NA	NA	NA	11.5342	11.3596	12.733	12.4586	11.9961	11.8333	12.1955	11.8729	12.1976	NA
sp|O95479|G6PE_HUMAN	O95479	NA	NA	NA	NA	12.7462	12.7933	12.8415	12.6377	13.1477	12.9154	12.96	13.0807	12.1323	11.691	11.806	11.7878
sp|O95486|SC24A_HUMAN	O95486	NA	NA	NA	NA	11.848	11.6021	11.6642	11.4974	12.0106	11.8224	11.7918	11.6152	11.3132	11.5438	10.8121	11.0399
sp|O95487|SC24B_HUMAN	O95487	NA	NA	NA	NA	10.8362	10.8237	11.1472	11.0829	10.7379	10.2362	10.9852	11.176	10.1576	10.0967	9.95106	9.70784
sp|O95528|GTR10_HUMAN	O95528	NA	NA	NA	NA	12.2335	12.488	11.7604	12.0114	13.5116	13.8444	13.6276	12.7464	NA	NA	NA	NA
sp|O95571|ETHE1_HUMAN	O95571	9.80573	NA	9.61916	7.77878	11.3863	9.71031	11.2055	11.1383	10.8691	8.7213	10.7476	9.62244	12.9587	13.3164	12.877	13.0185
sp|O95573|ACSL3_HUMAN	O95573	10.553	11.2891	10.9771	11.2645	13.0155	12.9181	13.024	12.9177	13.0262	12.9454	13.0791	13.2965	12.8057	13.0936	12.8293	12.8122
sp|O95630|STABP_HUMAN	O95630	NA	NA	NA	NA	11.2337	10.4216	10.4366	11.3051	9.90058	10.5935	10.1551	NA	10.6102	11.1817	11.653	11.4315
sp|O95671|ASML_HUMAN	O95671	NA	NA	NA	NA	12.3086	12.1637	12.4519	12.2768	11.9158	11.8877	11.8946	11.7402	10.8361	NA	NA	10.9888
sp|O95721|SNP29_HUMAN	O95721	NA	NA	NA	NA	12.3637	11.8828	11.8677	12.1349	12.1828	13.0792	12.7115	12.7783	12.6055	12.6785	12.729	12.8145
sp|O95747|OXSR1_HUMAN	O95747	10.616	9.75387	9.50557	9.77227	11.4909	11.4405	12.2273	12.0052	11.5991	11.5782	11.197	11.5918	11.5346	11.989	12.3317	12.0499
sp|O95757|HS74L_HUMAN	O95757	NA	NA	NA	NA	NA	NA	12.0223	NA	NA	NA	NA	NA	11.5225	11.7455	NA	NA
sp|O95782|AP2A1_HUMAN	O95782	10.6353	11.0885	10.634	10.7774	13.1637	13.2653	13.168	13.0644	13.2643	13.1602	13.416	13.2919	13.3691	13.162	13.2243	12.9527
sp|O95793|STAU1_HUMAN	O95793	10.5057	10.8236	10.603	10.4709	10.4313	11.1337	11.3957	11.2413	11.5881	12.2446	12.1706	12.1503	13.5349	13.2118	13.3118	13.2284
sp|O95810|CAVN2_HUMAN	O95810	11.3761	11.7839	11.4546	11.7372	13.2419	13.5825	13.6449	13.56	12.0376	12.6411	12.4258	12.7788	NA	NA	NA	NA
sp|O95816|BAG2_HUMAN	O95816	11.2721	10.7016	10.6752	10.8017	10.5585	11.7037	11.2882	11.3827	13.5734	13.5129	13.8133	13.3321	12.2614	12.6542	12.9671	12.6821
sp|O95817|BAG3_HUMAN	O95817	NA	NA	NA	NA	12.9621	12.7528	13.1818	12.8782	11.5426	10.0571	9.59291	10.6212	12.4763	11.9625	11.7221	11.7588
sp|O95819|M4K4_HUMAN	O95819	NA	NA	NA	NA	11.314	11.2437	11.0902	10.4899	NA	NA	NA	8.32151	NA	NA	NA	NA
sp|O95831|AIFM1_HUMAN	O95831	10.288	10.5715	10.3542	10.3144	11.8281	12.1191	11.9082	12.0909	12.9101	12.6543	12.4124	12.6054	13.8464	13.6729	13.6614	13.621
sp|O95834|EMAL2_HUMAN	O95834	NA	NA	NA	NA	12.6979	12.6443	12.5815	12.9592	10.9682	11.1172	11.4121	11.3226	11.5997	11.3853	11.5871	11.0536
sp|O95861|BPNT1_HUMAN	O95861	NA	NA	NA	NA	13.1665	13.1675	13.2797	12.6637	12.0778	11.7508	11.7598	12.1617	12.4486	12.2379	12.1205	12.2672
sp|O95865|DDAH2_HUMAN	O95865	NA	NA	NA	NA	NA	NA	NA	NA	12.9975	12.5646	13.0138	12.676	NA	11.3825	11.0361	NA
sp|O95870|ABHGA_HUMAN	O95870	10.5394	10.4454	10.3074	9.68303	12.8359	12.6791	12.8932	12.7302	11.0343	NA	12.4205	12.189	11.1583	11.1287	10.8988	11.1267
sp|O95881|TXD12_HUMAN	O95881	NA	NA	NA	NA	13.2725	12.6332	12.738	13.1202	12.8931	12.9544	12.9711	12.7523	12.3309	12.7831	12.7083	12.3351
sp|O95967|FBLN4_HUMAN	O95967	13.4359	13.3831	12.8835	13.336	10.7606	10.9548	10.5477	10.5358	14.3348	14.1704	13.9155	14.4601	NA	NA	NA	NA
sp|O95980|RECK_HUMAN	O95980	8.95057	9.07772	10.3862	9.7172	11.1299	11.6673	11.3652	11.4398	11.6891	11.7037	11.7853	11.7923	NA	NA	8.99292	NA
sp|O96000|NDUBA_HUMAN	O96000	12.2735	12.7485	12.3999	12.2577	12.6731	12.5682	12.3739	12.6754	13.2024	13.0517	12.6649	13.2194	13.2469	13.1569	13	13.1466
sp|O96005|CLPT1_HUMAN	O96005	9.6361	10.0915	10.1912	NA	12.2086	12.3564	12.2703	12.3169	10.9979	11.093	11.3077	11.5244	11.0963	11.015	11.1638	10.88
sp|O96008|TOM40_HUMAN	O96008	10.4465	10.6032	11.0529	10.4754	12.1535	11.8943	12.4703	11.6856	12.3958	12.177	12.3713	12.0798	13.3408	13.0126	12.9385	12.1043
sp|O96011|PX11B_HUMAN	O96011	NA	11.0618	11.3306	10.5609	12.6845	12.9956	12.9651	12.9512	12.6208	12.8293	12.8069	12.9529	11.8391	11.7662	11.5241	11.685
sp|O96019|ACL6A_HUMAN	O96019	9.39765	9.83228	NA	9.48798	10.7536	11.5288	11.2851	10.792	11.2179	10.8406	11.6984	11.4017	10.9567	10.7824	12.266	10.9931
sp|P00167|CYB5_HUMAN	P00167	NA	NA	NA	NA	13.4649	13.4247	13.3243	13.4778	12.3534	NA	12.2114	12.8874	NA	10.9901	NA	NA
sp|P00325|ADH1B_HUMAN	P00325	NA	NA	NA	NA	NA	NA	NA	NA	15.8134	15.2834	15.7454	15.844	NA	NA	NA	NA
sp|P00338|LDHA_HUMAN	P00338	9.77564	9.20946	9.68729	9.71904	13.4724	13.3802	13.3529	13.4226	13.3804	13.1973	13.3081	13.3074	15.2507	14.8577	15.1001	15.0993
sp|P00367|DHE3_HUMAN	P00367	11.7063	11.6334	11.9215	11.2272	13.1764	13.1161	13.2346	13.2017	13.6935	13.5602	13.375	13.7044	13.7741	13.6993	13.5473	13.4701
sp|P00374|DYR_HUMAN	P00374	NA	NA	NA	NA	NA	NA	NA	NA	NA	NA	NA	NA	12.5391	12.0781	12.3858	11.9849
sp|P00387|NB5R3_HUMAN	P00387	12.3965	12.669	11.6508	11.7463	14.3639	14.2832	14.2565	14.2377	13.7666	13.985	13.7887	13.973	11.4973	12.057	11.7992	12.1255
sp|P00390|GSHR_HUMAN	P00390	NA	NA	NA	NA	12.3432	12.5528	12.6092	12.3758	12.9511	13.218	13.0691	13.2513	13.7684	13.7398	13.5691	13.6137
sp|P00403|COX2_HUMAN	P00403	12.1432	11.8212	12.0406	11.6541	14.5374	14.4558	14.5802	14.5636	14.9855	14.9326	15.063	15.0246	15.1668	15.1256	15.093	15.0936
sp|P00441|SODC_HUMAN	P00441	NA	NA	NA	NA	NA	NA	NA	12.4315	12.3595	12.7839	NA	12.0852	12.6428	13.2709	12.2161	13.1163
sp|P00488|F13A_HUMAN	P00488	13.7779	13.6819	13.0193	13.2761	NA	NA	NA	NA	NA	NA	NA	NA	NA	12.1421	11.7636	NA
sp|P00491|PNPH_HUMAN	P00491	NA	NA	NA	NA	12.3009	11.2299	11.3903	11.8672	10.934	11.3841	10.653	10.1528	11.6225	11.268	11.3473	10.9175
sp|P00492|HPRT_HUMAN	P00492	NA	NA	NA	NA	12.3528	12.1449	12.4609	12.0045	11.4337	11.7991	10.8986	11.7189	13.6	13.5081	13.4845	13.3532
sp|P00505|AATM_HUMAN	P00505	NA	NA	NA	NA	12.9092	12.747	12.9229	12.8667	13.7634	13.7755	13.737	13.852	13.611	13.7477	13.6801	13.3715
sp|P00533|EGFR_HUMAN	P00533	NA	NA	NA	NA	10.5126	NA	10.6663	NA	11.7327	11.4215	11.9624	11.2331	11.7346	12.0287	11.4544	11.5454
sp|P00558|PGK1_HUMAN	P00558	9.81151	9.31016	9.75747	9.41347	14.032	14.0007	14.0061	13.9843	14.4265	14.3297	14.4272	14.1861	15.8833	15.9587	15.774	15.7195
sp|P00568|KAD1_HUMAN	P00568	11.4246	10.8226	NA	NA	13.0941	12.9391	13.0057	13.0217	12.8947	13.1113	12.853	12.8859	12.956	13.0773	13.0738	12.9429
sp|P00749|UROK_HUMAN	P00749	10.9988	NA	11.3093	11.1062	11.8908	11.9254	11.5945	11.8437	NA	NA	NA	NA	12.8014	13.3533	13.4402	13.3483
sp|P00750|TPA_HUMAN	P00750	NA	NA	NA	NA	NA	10.9829	NA	NA	12.5541	12.4307	12.1818	13.1899	NA	NA	NA	NA
sp|P00813|ADA_HUMAN	P00813	NA	NA	NA	NA	NA	NA	NA	NA	NA	NA	NA	NA	12.518	12.5658	12.419	12.285
sp|P00966|ASSY_HUMAN	P00966	12.5859	11.9723	12.2978	12.1951	13.1653	13.1483	13.1824	13.1948	NA	NA	NA	10.0561	11.2467	11.205	10.8444	9.92311
sp|P01023|A2MG_HUMAN	P01023	NA	NA	NA	NA	10.9294	10.7589	10.9352	10.7794	13.106	12.8234	12.4597	13.3172	12.1243	12.1652	12.2196	11.7539
sp|P01033|TIMP1_HUMAN	P01033	11.3334	NA	11.704	11.6656	13.0037	13.1397	13.2281	13.1718	11.4869	NA	12.0241	11.7262	13.2167	13.2549	12.9448	12.6281
sp|P01111|RASN_HUMAN	P01111	NA	NA	NA	NA	NA	NA	11.9564	NA	NA	NA	NA	NA	13.271	13.2526	12.7534	12.7219
sp|P01116|RASK_HUMAN	P01116	NA	11.2897	NA	NA	NA	NA	NA	NA	13.1766	12.8309	12.901	NA	12.4596	12.6374	12.4583	12.1697
sp|P01130|LDLR_HUMAN	P01130	NA	NA	NA	NA	11.5865	11.1731	11.3689	11.2674	11.6336	11.512	10.9932	12.0463	11.8843	12.0135	11.7505	11.5564
sp|P01137|TGFB1_HUMAN	P01137	12.9108	12.785	12.7675	12.7776	NA	NA	NA	NA	NA	NA	NA	NA	NA	NA	NA	NA
sp|P01344|IGF2_HUMAN	P01344	14.7549	14.784	14.5079	14.2047	10.1699	NA	NA	10.4062	10.9784	11.0967	11.0055	11.2359	NA	10.1276	NA	NA
sp|P01889|HLAB_HUMAN	P01889	NA	NA	NA	NA	14.201	14.1997	14.0766	14.2172	NA	11.5615	12.0316	NA	NA	NA	NA	NA
sp|P02452|CO1A1_HUMAN	P02452	15.1183	15.2359	15.0878	14.8854	13.4266	13.5169	13.7383	13.48	13.9594	13.4342	13.123	14.1775	9.2639	9.715	9.80651	9.74912
sp|P02461|CO3A1_HUMAN	P02461	13.5741	14.1545	13.5041	13.6278	10.6892	11.2295	11.3067	11.208	11.9504	11.5247	11.4436	12.0894	NA	NA	NA	NA
sp|P02462|CO4A1_HUMAN	P02462	16.2814	16.9234	17.3216	16.8239	12.535	12.6493	12.984	12.9383	14.0893	12.1289	12.4001	12.1272	NA	NA	NA	NA
sp|P02511|CRYAB_HUMAN	P02511	NA	NA	NA	NA	12.4296	NA	12.1272	12.4798	NA	NA	11.5119	NA	NA	NA	NA	10.8679
sp|P02545|LMNA_HUMAN	P02545	14.0232	14.0313	13.8878	14.0833	14.562	14.686	14.7781	14.6187	15.3183	15.1546	15.2011	15.3595	15.5236	15.2282	15.2005	15.0544
sp|P02649|APOE_HUMAN	P02649	11.5816	11.6188	11.8563	10.6059	10.3194	9.88331	10.3922	NA	11.3862	12.0775	11.5902	12.6607	11.1981	9.97071	9.93438	9.87006
sp|P02751|FINC_HUMAN	P02751	17.4179	17.4892	17.4578	17.3506	15.9222	16.0277	16.3992	16.2365	15.8942	15.5424	15.5984	15.9831	11.3563	11.4417	11.3828	11.1983
sp|P02786|TFR1_HUMAN	P02786	10.5715	NA	NA	NA	12.3922	12.6311	12.4969	12.3396	12.1103	11.8611	12.1158	12.6085	13.6704	13.6532	13.682	13.5414
sp|P02792|FRIL_HUMAN	P02792	11.7705	11.9172	11.6441	NA	NA	NA	11.3294	11.2499	12.4631	12.3578	11.9963	12.5151	NA	NA	NA	NA
sp|P02794|FRIH_HUMAN	P02794	10.6849	NA	10.2251	9.79843	11.8961	12.2504	11.7235	11.0823	11.5862	12.6302	12.364	11.6242	10.1061	11.7983	11.4345	11.8626
sp|P03886|NU1M_HUMAN	P03886	9.67356	10.4387	10.3421	11.1922	12.1432	12.2045	11.7641	12.4229	12.7685	12.9531	12.849	13.0456	12.2127	12.6126	12.5945	12.4569
sp|P03905|NU4M_HUMAN	P03905	12.34	12.5196	12.4864	12.2274	NA	NA	13.744	NA	12.6415	13.3205	13.4644	13.2188	12.6772	13.1812	13.147	13.3712
sp|P03915|NU5M_HUMAN	P03915	NA	11.4902	11.057	11.9293	12.0691	12.0278	12.7455	12.1781	11.3193	12.5292	11.8763	11.7975	11.4136	11.8776	11.789	12.781
sp|P04040|CATA_HUMAN	P04040	NA	NA	NA	11.0941	12.9935	13.0852	13.1318	12.9886	13.8032	13.5836	13.6466	13.6265	11.4036	11.0902	11.7255	11.7182
sp|P04062|GBA1_HUMAN	P04062	NA	NA	NA	NA	13.0001	12.9522	12.4288	13.265	12.9274	12.7875	12.7858	13.1663	12.8151	12.3951	12.3173	12.2978
sp|P04075|ALDOA_HUMAN	P04075	9.15697	9.12721	NA	9.32827	14.1732	14.0859	14.0626	14.0934	14.0688	13.8671	13.9054	13.7684	15.1679	15.258	15.1441	14.9753
sp|P04080|CYTB_HUMAN	P04080	9.04743	8.16188	8.78949	8.79069	13.0182	13.3789	13.0042	13.057	11.2575	10.6647	10.2564	9.92188	14.1742	14.3739	13.9761	14.3713
sp|P04083|ANXA1_HUMAN	P04083	10.5944	10.5655	10.944	10.9675	15.6434	15.6324	15.5429	15.5207	14.0279	14.0041	13.8918	14.0095	15.9977	16.0942	15.9258	15.9118
sp|P04114|APOB_HUMAN	P04114	NA	NA	NA	NA	11.8664	12.0222	12.1	12.1875	NA	NA	NA	NA	NA	NA	NA	NA
sp|P04150|GCR_HUMAN	P04150	NA	NA	NA	NA	NA	NA	NA	NA	NA	NA	8.89315	NA	11.183	10.8878	11.2206	11.0676
sp|P04179|SODM_HUMAN	P04179	NA	NA	NA	NA	14.0083	13.7425	13.857	13.8336	12.9077	13.4251	12.0064	13.5011	13.2641	13.3537	13.0195	13.1886
sp|P04181|OAT_HUMAN	P04181	9.65676	10.8094	9.902	10.077	12.049	11.8685	11.5754	11.2693	10.3654	10.2516	10.0214	10.3733	12.6604	12.4865	12.872	12.712
sp|P04216|THY1_HUMAN	P04216	12.0918	12.3552	12.6978	12.0989	NA	NA	NA	NA	14.5047	14.4156	14.39	14.6566	NA	NA	NA	NA
sp|P04233|HG2A_HUMAN	P04233	NA	NA	NA	NA	NA	NA	NA	NA	NA	NA	NA	NA	12.3727	12.7661	12.5383	12.4669
sp|P04406|G3P_HUMAN	P04406	13.9285	13.6355	13.268	13.3511	16.0293	15.9986	16.0683	16.0283	16.3841	16.3061	16.29	16.2032	17.0556	17.0235	16.682	16.6442
sp|P04424|ARLY_HUMAN	P04424	NA	NA	NA	NA	11.5449	11.3081	NA	12.2052	12.1687	12.3839	12.3329	11.7854	11.568	11.5771	11.4793	12.0354
sp|P04632|CPNS1_HUMAN	P04632	11.5295	11.4807	11.2542	11.0565	13.9397	13.6757	13.9961	13.7623	14.0459	13.8749	13.678	14.0028	15.3085	14.8569	14.8624	14.394
sp|P04792|HSPB1_HUMAN	P04792	13.7429	13.3736	13.6298	13.4519	15.7824	15.9386	15.8291	15.8074	15.6355	15.4417	15.3311	15.6461	16.2567	16.0742	16.1477	16.0256
sp|P04843|RPN1_HUMAN	P04843	12.7651	12.5789	12.5218	12.7674	14.5279	14.4655	14.5027	14.5374	14.762	14.7472	14.7016	14.5748	14.7632	14.7017	14.6391	14.5373
sp|P04844|RPN2_HUMAN	P04844	11.4089	10.9805	11.1248	11.2862	13.2626	13.1412	13.2362	13.0845	13.1893	13.4117	13.0456	13.0325	13.0007	13.2035	12.9984	12.877
sp|P04899|GNAI2_HUMAN	P04899	13.4193	13.1206	13.4947	13.3682	14.5042	14.4911	14.674	14.6546	13.8209	13.7457	13.7456	13.9587	14.5004	14.597	14.4279	14.4056
sp|P05023|AT1A1_HUMAN	P05023	10.4287	10.2862	10.6	10.0828	13.2985	13.1706	13.4321	13.2872	12.5092	12.4699	12.6575	12.5937	14.3248	14.2463	14.2652	14.1856
sp|P05026|AT1B1_HUMAN	P05026	NA	10.1539	NA	NA	11.4675	11.4379	11.3893	11.4846	11.1504	11.2329	11.8515	11.7189	13.4378	13.2405	13.2202	13.0438
sp|P05067|A4_HUMAN	P05067	NA	10.1025	10.6984	NA	11.9412	11.9507	12.1129	11.8733	NA	NA	NA	NA	10.6999	11.1712	10.1877	10.0385
sp|P05090|APOD_HUMAN	P05090	NA	NA	10.7166	NA	13.5159	13.5976	13.7631	13.3368	NA	NA	NA	NA	NA	NA	NA	NA
sp|P05091|ALDH2_HUMAN	P05091	11.1746	NA	NA	NA	NA	NA	NA	NA	13.465	13.297	13.3333	13.051	12.0892	11.6052	11.7829	11.3663
sp|P05106|ITB3_HUMAN	P05106	NA	NA	NA	NA	NA	NA	NA	NA	NA	11.0341	10.6982	10.5245	13.2962	13.0601	13.1285	12.9184
sp|P05109|S10A8_HUMAN	P05109	12.7493	15.3702	NA	11.9415	NA	NA	NA	NA	NA	NA	NA	NA	NA	NA	NA	NA
sp|P05121|PAI1_HUMAN	P05121	13.6304	13.9911	13.8926	13.9762	12.8564	13.1682	13.2669	13.0551	10.6538	10.9877	10.476	12.0612	11.4539	11.7509	11.3937	11.1782
sp|P05141|ADT2_HUMAN	P05141	13.8667	14.0583	13.6035	13.6373	14.4394	14.5021	14.4578	14.4216	14.1788	14.1983	14.0746	14.1977	15.8637	15.9257	15.7698	15.6803
sp|P05161|ISG15_HUMAN	P05161	NA	NA	NA	10.578	12.8462	12.9945	12.8807	13.0312	10.8431	11.4986	10.3662	11.7439	11.7567	11.792	11.7197	11.7424
sp|P05165|PCCA_HUMAN	P05165	NA	NA	NA	NA	NA	NA	NA	NA	11.9312	11.725	NA	NA	12.3792	NA	NA	NA
sp|P05186|PPBT_HUMAN	P05186	13.5732	13.6682	13.2545	13.6048	NA	NA	NA	NA	12.3206	11.915	12.1005	12.4127	NA	NA	NA	NA
sp|P05198|IF2A_HUMAN	P05198	11.196	11.2039	11.435	11.1178	12.9406	12.9311	12.9386	12.8053	13.4934	13.429	13.4169	13.3591	14.1801	14.2248	14.2498	14.0548
sp|P05230|FGF1_HUMAN	P05230	12.1633	11.9021	11.909	11.6304	NA	NA	10.4496	10.3081	NA	NA	NA	NA	NA	NA	NA	NA
sp|P05362|ICAM1_HUMAN	P05362	NA	NA	NA	NA	13.1985	13.1997	13.3411	13.2834	11.6016	11.2019	11.231	11.7772	12.4853	12.4674	11.981	12.1734
sp|P05386|RLA1_HUMAN	P05386	12.0062	11.4191	11.9287	11.7124	15.0805	14.4849	14.6823	15.0029	15.9591	16.0003	15.642	15.811	15.8528	15.6607	15.5401	15.4692
sp|P05387|RLA2_HUMAN	P05387	12.9111	12.6258	12.8207	12.5019	14.674	14.576	14.5974	14.666	15.6606	15.6205	15.558	15.6125	15.5885	15.4541	15.3577	15.3008
sp|P05388|RLA0_HUMAN	P05388	11.5148	12.0802	11.5086	11.743	14.057	14.05	14.2354	14.1252	14.9499	14.8282	15.0244	14.6271	14.9122	14.7025	14.844	14.746
sp|P05412|JUN_HUMAN	P05412	NA	NA	NA	NA	NA	NA	NA	NA	NA	NA	NA	NA	12.6277	12.3166	12.4142	12.2132
sp|P05413|FABPH_HUMAN	P05413	NA	NA	NA	NA	12.8002	12.7262	12.6942	12.7724	13.3262	13.1906	13.4473	13.4044	NA	12.1631	11.9232	NA
sp|P05455|LA_HUMAN	P05455	NA	9.97026	NA	NA	13.0656	13.0695	12.9345	13.0231	13.4915	13.7161	13.5879	13.282	13.3075	13.2744	13.1752	13.2414
sp|P05556|ITB1_HUMAN	P05556	12.1512	12.3914	12.3929	12.0086	15.4712	15.4928	15.5546	15.4419	14.749	14.7078	14.6332	14.9157	15.3043	15.1635	15.0982	15.0411
sp|P05997|CO5A2_HUMAN	P05997	15.104	15.1887	15.0432	14.7701	11.8045	11.7815	12.0427	12.1113	12.9429	12.4437	11.9789	12.9245	NA	9.68925	9.74791	9.29458
sp|P06132|DCUP_HUMAN	P06132	NA	NA	NA	NA	11.812	11.512	11.28	11.643	11.1621	10.1387	11.1875	11.4398	12.206	12.3959	11.8151	12.18
sp|P06241|FYN_HUMAN	P06241	NA	NA	NA	NA	11.7348	10.803	11.5598	11.5011	NA	NA	10.959	11.008	10.4167	NA	11.1669	11.6485
sp|P06280|AGAL_HUMAN	P06280	NA	NA	NA	NA	NA	NA	NA	NA	NA	10.9102	10.6649	11.0482	12.432	12.4052	11.9905	12.2979
sp|P06396|GELS_HUMAN	P06396	12.5381	13.5659	12.8326	11.5731	14.105	13.6189	13.9135	14.0197	14.2479	14.1726	13.8619	13.9802	13.1312	12.8974	11.5255	12.5149
sp|P06454|PTMA_HUMAN	P06454	NA	12.7381	12.8042	12.4798	13.8388	13.8484	14.0555	13.8811	14.5906	15.907	15.8701	15.0817	13.4633	15.2886	15.368	15.5576
sp|P06493|CDK1_HUMAN	P06493	NA	NA	NA	NA	NA	NA	NA	NA	NA	NA	NA	NA	11.1961	10.9301	10.9158	11.077
sp|P06576|ATPB_HUMAN	P06576	12.5491	12.0863	12.2597	12.1265	14.3636	14.3189	14.3378	14.3157	14.983	15.0397	14.9906	15.0021	15.2356	15.2467	15.1394	15.1585
sp|P06703|S10A6_HUMAN	P06703	15.2076	15.6239	15.4322	15.2132	16.6581	16.7929	16.8248	16.6678	17.6791	17.6363	17.7367	17.8834	18.346	18.4655	18.0712	18.1333
sp|P06730|IF4E_HUMAN	P06730	10.6006	NA	11.2672	NA	12.7952	12.8357	12.7818	12.7998	13.1943	13.6485	13.2047	12.9421	12.7761	12.1858	12.0108	12.0576
sp|P06733|ENOA_HUMAN	P06733	10.8236	10.9588	10.7912	11.0173	15.3902	15.268	15.3947	15.213	15.613	15.512	15.4639	15.4137	16.748	16.764	16.5692	16.5323
sp|P06737|PYGL_HUMAN	P06737	NA	NA	NA	NA	12.0162	11.8863	11.9603	12.1421	11.0878	10.7595	10.8374	10.917	10.8589	10.7304	11.1599	11.0116
sp|P06744|G6PI_HUMAN	P06744	NA	NA	NA	NA	13.1241	13.1659	13.0396	13.1732	14.0382	13.8547	13.7647	13.8522	14.6665	14.6493	14.4628	14.2906
sp|P06748|NPM_HUMAN	P06748	11.7263	10.3977	11.2727	11.4148	14.3325	14.3392	14.4812	14.5486	15.3202	15.3358	15.218	15.2231	16.1423	16.1227	15.9609	15.6662
sp|P06753|TPM3_HUMAN	P06753	13.1843	14.047	12.8779	13.082	15.8667	15.9359	15.7649	15.8432	15.5191	16.2888	15.9677	15.7646	15.5058	15.1003	15.0814	16.161
sp|P06756|ITAV_HUMAN	P06756	NA	10.3774	NA	9.41714	12.2098	12.3712	12.5246	12.2736	13.0263	12.954	12.9249	12.7073	13.1094	13.0852	13.1161	12.9246
sp|P06865|HEXA_HUMAN	P06865	NA	NA	NA	NA	12.8182	12.5455	12.5404	12.6125	13.2168	13.3292	13.353	12.8179	12.617	12.6733	12.6931	12.3498
sp|P07099|HYEP_HUMAN	P07099	11.1071	9.37483	10.0445	10.7991	12.5894	12.7575	13.1817	11.8925	13.6524	13.5362	13.4869	13.4498	12.1866	12.1268	12.0938	11.9577
sp|P07108|ACBP_HUMAN	P07108	NA	NA	NA	NA	12.2918	NA	NA	NA	12.0827	13.1093	12.2996	NA	14.1035	14.2234	13.9872	13.957
sp|P07195|LDHB_HUMAN	P07195	10.3277	9.73442	9.86478	9.73726	15.1856	15.246	15.1723	15.1718	15.2998	15.35	15.3889	15.349	15.7341	15.7089	15.5218	15.4478
sp|P07203|GPX1_HUMAN	P07203	11.9381	12.0748	11.6432	11.2729	13.6023	13.9088	13.861	13.7609	14.2211	14.1096	14.058	14.0516	11.8592	12.4242	12.3236	12.1277
sp|P07237|PDIA1_HUMAN	P07237	11.5109	11.0804	11.2803	10.8975	15.1521	15.0631	15.1612	15.1334	15.1188	15.0576	14.9824	15.0408	14.5988	14.4031	14.3124	14.2278
sp|P07305|H10_HUMAN	P07305	12.3399	13.0023	12.6141	12.551	12.2779	11.7612	12.5295	12.2594	11.2633	11.8006	10.9942	11.7832	10.2374	10.9058	10.1745	10.6822
sp|P07339|CATD_HUMAN	P07339	12.9236	12.8563	12.7551	12.6669	15.3217	15.2827	15.3423	15.3083	14.8168	14.89	14.8495	14.9027	15.1822	15.2016	15.0213	14.9907
sp|P07355|ANXA2_HUMAN	P07355	12.2612	12.5524	12.4091	12.231	16.9088	16.4108	16.6275	16.5165	16.2064	16.3689	16.0814	15.9732	16.5097	16.5678	16.5008	16.5228
sp|P07384|CAN1_HUMAN	P07384	11.0292	11.4941	10.7027	10.9131	12.7999	12.7844	12.9894	13.0741	13.0128	13.4565	13.3197	13.4647	14.0586	13.9661	13.8586	13.8321
sp|P07437|TBB5_HUMAN	P07437	12.3191	12.8491	12.7712	12.3372	16.2067	16.13	16.1081	16.2311	16.5706	16.5781	16.449	15.9018	16.2964	16.6512	16.3623	16.3081
sp|P07585|PGS2_HUMAN	P07585	9.79869	NA	NA	NA	8.80158	8.8167	8.88793	8.81947	14.6192	14.8303	14.7884	14.4946	11.6961	NA	11.2148	11.2003
sp|P07602|SAP_HUMAN	P07602	8.51877	NA	NA	NA	14.0674	14.0585	13.8461	13.9966	14.0096	14.6196	13.9424	13.7554	14.0142	14.0235	13.9645	13.9766
sp|P07686|HEXB_HUMAN	P07686	9.83545	NA	NA	9.03407	13.4029	13.1937	13.2562	13.2178	14.2272	14.1691	14.1598	14.1781	13.3137	13.1512	13.0043	13.0089
sp|P07711|CATL1_HUMAN	P07711	11.3427	NA	10.6964	10.8618	11.3474	10.9821	NA	11.4622	11.6154	10.4465	NA	12.1197	13.4114	13.3476	13.2451	13.1698
sp|P07737|PROF1_HUMAN	P07737	10.0844	10.0785	10.7159	10.4106	15.7749	15.6571	15.6354	15.7993	16.2786	15.9818	16.2058	16.1966	16.0803	16.1718	15.9813	15.9681
sp|P07741|APT_HUMAN	P07741	10.2716	NA	11.27	10.0478	13.6186	13.6775	13.9213	13.6334	13.5798	13.3238	12.4766	13.5837	14.1259	13.4533	13.9904	13.9904
sp|P07814|SYEP_HUMAN	P07814	11.4417	11.5102	11.5971	11.2666	13.0759	12.9863	13.2352	13.146	13.1495	13.0901	13.2036	13.0871	13.4174	12.9937	13.0109	12.9309
sp|P07858|CATB_HUMAN	P07858	11.7473	11.6321	11.2191	11.3407	13.4704	13.2806	13.4576	13.5687	14.7792	15.1393	14.9806	15.0697	14.9041	14.9032	14.7416	14.7522
sp|P07900|HS90A_HUMAN	P07900	10.6261	10.7052	9.30899	10.8869	14.7571	14.5371	14.7197	14.6005	14.7081	14.6765	14.583	14.3968	15.853	15.792	15.6065	15.4143
sp|P07910|HNRPC_HUMAN	P07910	14.5331	14.6843	14.3908	14.6171	15.6972	15.7645	15.9375	15.8397	16.544	16.4212	16.6632	16.1852	16.1216	16.0789	16.0178	16.1072
sp|P07919|QCR6_HUMAN	P07919	NA	NA	NA	NA	12.5138	12.4573	12.223	12.4404	13.0327	13.4422	13.2067	12.9404	14.1341	14.3941	NA	14.3042
sp|P07942|LAMB1_HUMAN	P07942	15.3042	15.3756	15.1647	15.1641	12.9552	12.9837	13.4152	13.0869	13.2889	13.1134	12.9258	13.5067	10.4093	9.75525	9.9963	9.56209
sp|P07947|YES_HUMAN	P07947	NA	NA	NA	NA	11.4288	10.7428	11.3235	11.3592	10.0368	9.03079	NA	9.60696	10.3858	NA	10.1862	10.3639
sp|P07954|FUMH_HUMAN	P07954	NA	NA	9.58721	10.9519	12.7632	12.8454	12.7768	12.6515	13.2191	13.2222	13.1071	13.1875	13.6439	13.6279	13.6207	13.2348
sp|P07996|TSP1_HUMAN	P07996	13.8857	14.7694	13.9981	13.8516	NA	10.0896	NA	NA	15.322	15.0009	14.7954	15.414	NA	NA	NA	NA
sp|P08123|CO1A2_HUMAN	P08123	15.0394	14.9875	14.9584	14.6121	13.9585	14.0799	14.3516	14.2642	14.0533	13.7469	13.4978	14.6053	9.46951	10.202	10.1621	9.97627
sp|P08133|ANXA6_HUMAN	P08133	10.9479	9.91225	10.5217	10.3884	13.948	13.9536	13.9703	13.9302	14.5249	14.6115	14.5296	14.4769	13.2405	13.3043	13.1896	13.1093
sp|P08134|RHOC_HUMAN	P08134	10.8665	11.8624	11.6015	11.7056	13.7989	13.4447	13.1545	13.9721	13.8833	13.3587	13.4658	13.7148	14.393	13.8626	14.0829	14.1224
sp|P08195|4F2_HUMAN	P08195	NA	9.9833	9.92969	9.63715	11.7156	12.1916	11.6653	11.832	13.8851	13.8253	13.7957	13.3318	11.9685	10.4887	12.0572	11.9317
sp|P08237|PFKAM_HUMAN	P08237	NA	NA	10.7019	10.4453	11.5848	11.7833	11.5222	11.8485	11.7669	11.2012	9.79127	11.2484	12.6764	12.2489	12.3108	12.3578
sp|P08238|HS90B_HUMAN	P08238	11.0123	11.0747	10.9085	9.42992	14.7133	14.619	14.6722	14.7377	14.8333	14.9022	14.7627	14.794	15.9221	15.7264	15.728	15.5885
sp|P08240|SRPRA_HUMAN	P08240	10.44	10.0476	10.051	9.6436	12.8927	12.5731	12.7884	12.6424	11.9503	11.9018	11.9378	12.0442	12.1246	12.2012	11.5658	11.998
sp|P08243|ASNS_HUMAN	P08243	NA	NA	NA	8.40743	11.242	12.1869	12.1874	11.9478	11.9122	12.8069	11.3225	11.3966	11.5439	11.6291	11.3669	11.0015
sp|P08253|MMP2_HUMAN	P08253	8.68242	NA	8.92317	8.73262	10.1906	10.195	10.8476	10.7532	11.1758	11.3991	11.1234	11.2306	11.4477	10.2746	11.3833	10.8512
sp|P08473|NEP_HUMAN	P08473	NA	9.44761	NA	9.31945	10.9155	11.0465	10.9944	11.0041	11.6645	11.3474	11.2307	11.186	12.8341	12.7306	12.7888	12.7177
sp|P08493|MGP_HUMAN	P08493	16.183	16.0445	15.9425	15.9845	10.2023	10.6524	10.4196	10.5708	12.4305	12.4931	12.8824	13.0029	NA	NA	NA	NA
sp|P08559|ODPA_HUMAN	P08559	11.9002	12.0005	11.5303	11.0703	13.3054	13.4795	13.4384	13.6047	13.5072	13.2373	13.3294	13.2665	14.5441	14.4844	14.3006	14.3249
sp|P08572|CO4A2_HUMAN	P08572	15.2278	15.4188	15.5327	15.1583	12.2308	12.3403	12.6421	12.4763	12.7284	11.4446	10.8627	11.1989	NA	9.25418	NA	NA
sp|P08574|CY1_HUMAN	P08574	10.3305	10.9274	10.1818	10.2068	12.4855	11.8011	12.9732	12.8096	13.3362	12.9501	12.4402	12.3727	14.1113	13.9415	13.8973	13.3481
sp|P08579|RU2B_HUMAN	P08579	NA	NA	NA	NA	NA	NA	NA	NA	12.5006	12.4803	NA	12.2221	NA	NA	11.84	11.4607
sp|P08621|RU17_HUMAN	P08621	10.3309	10.157	NA	NA	12.1159	12.2181	11.4798	12.2373	12.4369	12.5265	12.1914	12.2008	12.6733	12.6325	12.5173	12.4433
sp|P08648|ITA5_HUMAN	P08648	10.5473	10.5349	10.3925	10.1332	13.7259	13.6116	13.7275	13.697	12.4668	12.4049	12.0541	12.2683	13.8323	13.7151	13.6274	13.484
sp|P08651|NFIC_HUMAN	P08651	12.0067	10.9151	11.8168	11.3576	NA	NA	NA	NA	12.2083	12.5207	NA	NA	12.5273	12.3323	12.6395	12.4288
sp|P08670|VIME_HUMAN	P08670	15.0886	14.6922	14.7838	14.4018	16.5861	16.7026	16.7816	16.7482	16.4084	16.3217	16.3507	16.4296	17.112	17.007	16.866	16.6935
sp|P08708|RS17_HUMAN	P08708	14.4086	14.1554	14.1315	13.9671	14.1052	14.2454	14.2226	14.2317	14.7001	14.5406	14.5672	14.7575	14.5463	14.4859	14.5186	14.407
sp|P08754|GNAI3_HUMAN	P08754	9.0667	9.66142	9.69268	7.91391	9.80337	10.5032	10.2152	10.2081	10.6896	10.487	11.1318	10.3566	13.0304	13.076	12.755	12.803
sp|P08758|ANXA5_HUMAN	P08758	11.3961	10.2344	10.2298	10.5628	16.0923	15.9844	16.0728	16.0406	16.3475	16.4363	16.3219	16.2936	14.6367	14.7796	14.6999	14.571
sp|P08865|RSSA_HUMAN	P08865	NA	NA	NA	NA	14.5163	14.2034	14.1442	14.1076	14.7456	14.808	14.7383	14.5779	14.6228	14.6767	14.5639	14.42
sp|P08962|CD63_HUMAN	P08962	9.68368	NA	10.3178	10.9631	13.7459	13.7844	13.9263	13.9885	12.6842	11.9722	13.2341	13.4121	11.9327	11.7448	11.9319	12.2928
sp|P09001|RM03_HUMAN	P09001	11.9322	11.6439	11.5952	NA	NA	NA	NA	12.8464	12.4217	NA	NA	NA	NA	13.1944	NA	13
sp|P09012|SNRPA_HUMAN	P09012	11.5391	11.1045	NA	NA	11.7941	11.8017	11.7935	12.674	13.9953	13.6914	13.7823	13.8157	14.0357	13.7535	13.4991	13.4542
sp|P09038|FGF2_HUMAN	P09038	13.5416	13.4807	13.2868	13.2542	NA	10.7803	10.0321	10.0633	11.8727	11.7499	11.315	11.102	NA	9.49539	9.02719	NA
sp|P09104|ENOG_HUMAN	P09104	NA	NA	NA	NA	11.0989	10.7958	10.4151	11.2777	12.0052	11.764	11.8975	11.5393	14.7451	14.7397	14.5085	14.4906
sp|P09110|THIK_HUMAN	P09110	NA	NA	NA	NA	11.7227	11.4727	11.6762	11.5731	11.6969	11.0812	11.4651	11.6717	10.7901	10.7466	10.865	10.668
sp|P09132|SRP19_HUMAN	P09132	10.5664	NA	9.53516	10.0745	10.8095	11.7358	11.8188	11.398	11.0054	10.9588	11.5438	11.7056	10.8191	10.7346	11.1408	10.8807
sp|P09211|GSTP1_HUMAN	P09211	10.2092	10.3759	10.041	10.1082	13.2964	12.7416	12.7519	13.3157	14.0756	14.2235	13.9718	13.7983	12.0904	12.5451	11.8316	12.5469
sp|P09234|RU1C_HUMAN	P09234	NA	NA	NA	NA	11.821	11.6408	NA	11.3365	NA	NA	NA	12.3873	NA	NA	NA	NA
sp|P09382|LEG1_HUMAN	P09382	13.4711	13.5233	12.8829	13.3067	16.1509	16.3814	15.9716	16.2622	16.7547	17.0128	16.868	17.1589	16.7279	16.6903	16.6466	16.5823
sp|P09417|DHPR_HUMAN	P09417	NA	NA	NA	11.4118	11.9325	NA	12.5762	NA	12.7629	12.7939	12.8273	12.9314	13.5977	13.303	13.3762	13.2591
sp|P09429|HMGB1_HUMAN	P09429	NA	NA	NA	NA	12.4375	12.9005	13.054	12.871	14.3819	14.2161	14.2671	14.107	13.4438	12.8951	13.431	13.314
sp|P09486|SPRC_HUMAN	P09486	10.6281	8.64272	8.80654	10.1735	13.2632	13.2405	13.2539	13.1059	11.5127	11.9586	10.803	12.3661	8.57684	8.50659	8.43798	8.40937
sp|P09493|TPM1_HUMAN	P09493	13.8345	14.4234	13.5785	13.6616	12.6825	13.3453	12.6248	13.179	13.9759	14.1386	14.0369	13.6675	13.153	13.1664	13.323	12.8089
sp|P09496|CLCA_HUMAN	P09496	NA	NA	9.4337	NA	11.7025	11.5361	11.2306	11.6121	12.0821	12.499	12.5048	12.6634	13.1448	13.5204	13.5482	13.5419
sp|P09497|CLCB_HUMAN	P09497	NA	NA	NA	NA	12.7001	13.2296	13.0333	12.971	13.2291	13.183	13.0861	13.2058	12.2237	11.9768	12.1992	12.1619
sp|P09525|ANXA4_HUMAN	P09525	8.80846	9.23709	9.1388	9.05617	13.5952	13.5439	13.6107	13.5387	13.3024	13.2451	13.0847	13.2096	13.8502	13.9501	13.9173	13.8054
sp|P09543|CN37_HUMAN	P09543	9.61931	10.4602	10.6849	10.7506	11.5486	11.5177	11.3885	11.1754	12.4789	12.4122	12.2878	12.1399	12.6528	12.4509	12.5645	12.4397
sp|P09601|HMOX1_HUMAN	P09601	NA	NA	NA	NA	10.7727	NA	NA	10.3023	10.6709	10.581	NA	9.82864	13.587	13.4498	13.2058	13.2101
sp|P09619|PGFRB_HUMAN	P09619	11.092	11.2973	NA	10.4771	12.9744	13.0494	13.3172	13.1106	11.2877	12.5136	11.6818	11.9594	10.3206	10.1686	NA	NA
sp|P09622|DLDH_HUMAN	P09622	NA	10.5166	NA	NA	12.833	12.5423	12.9256	12.7617	12.5678	12.7126	12.4976	13.0396	13.7625	13.6147	13.5899	13.6708
sp|P09661|RU2A_HUMAN	P09661	9.37658	9.12612	9.20144	NA	11.1242	11.9445	11.4486	11.3674	12.4259	12.0026	12.5592	12.829	12.899	12.7786	12.6182	12.6962
sp|P09669|COX6C_HUMAN	P09669	14.9951	15.1456	15.254	14.9907	15.3277	15.5052	15.4619	15.3695	15.1726	15.2592	15.1758	15.3358	15.4512	15.3536	15.1952	15.463
sp|P09874|PARP1_HUMAN	P09874	11.945	11.3472	12.0463	11.7651	10.7496	11.0865	10.9695	10.9522	12.2395	12.454	12.2966	11.6448	13.3971	13.3095	13.2324	13.1005
sp|P09914|IFIT1_HUMAN	P09914	NA	NA	NA	NA	11.7403	11.9066	11.6494	12.0388	NA	NA	NA	NA	NA	NA	NA	NA
sp|P09936|UCHL1_HUMAN	P09936	NA	NA	10.0044	9.49373	13.8199	13.8149	13.6385	13.7817	15.2908	15.118	15.1026	15.1945	14.7553	14.6276	14.5123	14.3518
sp|P09960|LKHA4_HUMAN	P09960	NA	NA	NA	NA	12.3311	12.3244	12.4045	12.3533	12.77	12.7032	12.6592	12.5709	11.5104	11.4457	11.57	11.3498
sp|P09972|ALDOC_HUMAN	P09972	8.43686	NA	NA	NA	12.3351	11.8232	11.9025	12.1307	11.7182	11.8385	11.9076	11.4104	13.9791	13.7682	14.076	13.7223
sp|P0CG08|GPHRB_HUMAN	P0CG08	10.8373	10.6304	10.7637	10.265	11.1915	11.1648	11.29	11.1478	10.7897	11.2391	11.4961	11.4059	12.0569	11.6881	11.5681	11.7099
sp|P0DMV8|HS71A_HUMAN	P0DMV8	8.57344	NA	NA	10.3992	11.6834	12.2611	12.3256	11.9154	10.5805	11.1282	13.1505	12.8902	13.2291	12.9117	13.311	12.701
sp|P0DP24|CALM2_HUMAN	P0DP24	11.5442	11.6001	10.4824	11.219	14.0683	13.9303	13.8349	14.0644	13.9316	14.1779	13.7346	14.078	13.8723	14.1851	14.2713	14.3078
sp|P10155|RO60_HUMAN	P10155	10.1638	9.38385	9.53669	9.50626	11.8604	12.4871	12.0837	12.0207	12.1471	12.7116	12.5531	12.8483	10.8158	10.7416	11.9271	10.7719
sp|P10253|LYAG_HUMAN	P10253	NA	NA	NA	NA	10.9535	10.7048	10.6656	10.2343	12.7881	13.161	13.1119	13.0083	11.3354	11.021	11.0589	10.8256
sp|P10301|RRAS_HUMAN	P10301	11.7635	11.3319	NA	11.6624	14.2612	14.3335	13.9261	14.2604	13.6091	13.5065	13.5201	13.5927	13.5823	13.7896	13.8571	13.9698
sp|P10321|HLAC_HUMAN	P10321	NA	NA	8.96807	NA	12.0869	12.2601	13.0666	12.3322	10.2516	11.0029	11.8916	10.2341	11.1799	11.09	11.1244	11.2375
sp|P10412|H14_HUMAN	P10412	17.074	17.2457	16.9717	16.7586	13.3057	13.1372	13.483	13.239	15.776	15.892	15.8935	15.5985	16.5785	16.4861	16.5404	16.4976
sp|P10515|ODP2_HUMAN	P10515	11.5064	10.7785	11.2689	11.3137	13.2899	13.4317	13.5164	13.4187	13.5122	13.4892	13.3233	13.5911	12.3527	12.2975	12.3115	12.2081
sp|P10599|THIO_HUMAN	P10599	11.6844	11.4383	11.1913	11.4034	15.1503	15.1613	15.0409	15.1132	14.9522	14.8685	14.8676	14.9608	15.2333	15.27	15.0051	14.9373
sp|P10606|COX5B_HUMAN	P10606	11.4968	12.3311	11.8592	12.1762	14.8109	14.8492	14.6862	14.6679	15.004	15.3099	15.1411	15.4098	15.2483	15.4197	15.5285	15.5701
sp|P10619|PPGB_HUMAN	P10619	8.29395	NA	9.64012	NA	11.1158	10.905	11.1977	10.5636	12.062	11.2042	11.2463	11.5246	13.4588	13.4721	13.455	13.3309
sp|P10620|MGST1_HUMAN	P10620	13.0074	12.7098	12.4656	13.0497	15.2973	15.2164	15.3753	15.1465	14.3672	14.2156	14.4503	14.7044	14.9782	14.8971	14.716	14.7419
sp|P10644|KAP0_HUMAN	P10644	10.5456	NA	NA	NA	13.0181	12.9051	13.2825	13.1423	12.6299	12.4168	12.365	12.6177	13.7192	13.6589	13.6106	13.4809
sp|P10768|ESTD_HUMAN	P10768	11.1531	11.5911	11.2409	11.2356	13.126	13.3609	13.407	13.3597	13.1873	12.7566	12.9122	12.956	13.424	13.5543	13.5058	13.2817
sp|P10809|CH60_HUMAN	P10809	10.139	10.1497	10.4773	10.5003	13.83	13.5967	13.6332	13.8439	14.7024	14.603	14.5611	14.4925	15.6133	15.4164	15.3844	15.2224
sp|P11021|BIP_HUMAN	P11021	11.101	10.8987	10.8082	10.8176	15.1217	14.9786	15.079	15.0684	15.3826	15.2873	15.234	15.3437	14.6984	14.5383	14.4935	14.4076
sp|P11047|LAMC1_HUMAN	P11047	15.8348	15.8289	15.7007	15.6457	12.9243	12.9712	13.4844	13.2879	12.9369	12.5636	12.4096	13.1548	9.07615	8.29924	8.43991	8.2496
sp|P11117|PPAL_HUMAN	P11117	NA	NA	NA	NA	11.7152	12.203	11.8007	11.3746	12.0325	12.881	12.6688	12.1183	11.4775	12.1257	NA	NA
sp|P11142|HSP7C_HUMAN	P11142	12.1098	12.1195	11.8636	11.9239	15.5539	15.4776	15.5842	15.4942	15.7408	15.7246	15.7379	15.8391	16.1848	16.0348	16.0314	15.8553
sp|P11166|GTR1_HUMAN	P11166	11.642	11.6833	10.9898	11.778	10.5788	10.928	10.5491	10.6283	10.2191	10.4787	9.95622	NA	13.8037	13.9691	14.0544	14.0236
sp|P11172|UMPS_HUMAN	P11172	NA	NA	NA	NA	11.3984	11.6455	11.9702	11.4949	11.984	11.8819	11.6755	11.3274	12.8311	12.5977	12.6382	12.4153
sp|P11177|ODPB_HUMAN	P11177	11.3932	11.7826	11.4257	10.9722	13.1692	13.1976	13.287	13.1354	13.4691	13.3393	13.3828	13.3883	14.6493	14.6608	14.6015	14.5083
sp|P11182|ODB2_HUMAN	P11182	11.9952	10.9814	11.9594	11.6263	10.4953	10.4304	10.0144	10.3643	11.871	12.2737	11.8913	11.8593	12.5462	12.6251	12.2823	11.5731
sp|P11216|PYGB_HUMAN	P11216	9.8367	9.35492	10.0885	10.4091	15.0564	15.058	15.0067	15.1272	12.0048	12.274	11.7027	11.953	11.2834	11.0139	10.7902	10.7355
sp|P11233|RALA_HUMAN	P11233	10.7849	10.5354	10.4332	10.443	12.2167	11.5227	12.3543	12.2913	13.4631	13.1695	12.9557	13.0758	13.8673	13.7999	13.2837	12.9772
sp|P11234|RALB_HUMAN	P11234	11.4907	11.0389	NA	NA	12.7464	13.0745	13.2867	12.9946	12.6348	12.4956	12.4898	12.5605	12.0251	13.036	12.8479	12.6288
sp|P11279|LAMP1_HUMAN	P11279	NA	10.073	NA	10.919	14.6521	14.4346	14.6533	14.4669	14.4388	14.5373	14.6528	14.5353	13.9611	14.1988	14.0877	14.114
sp|P11310|ACADM_HUMAN	P11310	NA	NA	NA	NA	12.7246	12.4214	13.0589	12.9699	11.2895	11.3035	11.5375	12.4992	13.5133	13.3869	13.5113	13.1965
sp|P11387|TOP1_HUMAN	P11387	10.8909	10.9005	11.5684	11.4612	11.7813	11.506	11.4242	11.7438	13.7056	13.6915	13.4756	13.2284	13.7454	13.7034	13.6367	13.4649
sp|P11388|TOP2A_HUMAN	P11388	12.0047	12.3345	11.7499	11.785	NA	NA	NA	NA	NA	NA	NA	NA	11.3883	11.459	11.8077	11.4497
sp|P11413|G6PD_HUMAN	P11413	10.9689	10.5669	10.8416	10.5858	12.816	12.8716	12.8977	12.9192	13.5389	13.5484	13.5748	13.3904	13.0135	13.2423	13.234	13.0844
sp|P11441|UBL4A_HUMAN	P11441	NA	NA	NA	NA	NA	NA	NA	NA	13.0112	12.9628	12.8525	12.6789	14.0196	13.3213	13.386	13.2757
sp|P11498|PYC_HUMAN	P11498	9.33851	NA	9.82196	9.66263	11.9088	12.2949	12.4723	12.3242	10.3227	10.8703	10.8617	10.991	10.8173	10.8231	10.9231	10.6224
sp|P11586|C1TC_HUMAN	P11586	10.759	10.5824	10.46	10.2542	12.6804	12.5869	12.5654	12.6498	12.0569	12.2309	12.2851	12.4256	14.6766	14.5517	14.5177	14.5135
sp|P11717|MPRI_HUMAN	P11717	8.74859	8.63768	9.5164	10.0322	12.3954	12.394	12.6721	12.5221	13.2104	12.964	13.0121	13.0267	12.8904	12.6733	12.6732	12.2972
sp|P11766|ADHX_HUMAN	P11766	NA	11.8905	NA	NA	13.096	13.2421	13.0935	13.1087	14.6837	14.4342	14.6371	14.6129	12.9744	12.928	12.6837	12.542
sp|P11908|PRPS2_HUMAN	P11908	NA	NA	NA	NA	NA	NA	NA	NA	11.9489	NA	NA	11.8083	12.6374	12.0621	12.4154	12.0368
sp|P11940|PABP1_HUMAN	P11940	10.525	10.9948	NA	10.3025	13.9809	13.9247	13.9969	14.0304	14.6295	14.5308	14.6365	14.4837	14.3855	14.2492	14.2553	14.1659
sp|P12004|PCNA_HUMAN	P12004	NA	9.95927	9.66168	NA	11.7749	12.1232	11.8492	11.8578	12.9547	12.8806	12.8694	12.772	14.105	13.7214	13.7951	13.6934
sp|P12081|HARS1_HUMAN	P12081	10.8293	10.9088	10.8604	10.7907	12.5949	12.738	12.949	12.6232	12.6866	12.6594	13.1095	12.5961	12.5106	12.7726	12.7522	12.6691
sp|P12107|COBA1_HUMAN	P12107	13.696	13.7202	13.578	13.3994	12.0378	12.0922	12.1522	12.2279	NA	NA	NA	NA	NA	NA	NA	NA
sp|P12109|CO6A1_HUMAN	P12109	14.851	14.2944	14.5925	14.8424	14.8007	14.8007	15.3121	15.051	14.8901	14.6599	14.5964	15.0998	12.9129	12.7648	12.7259	12.5759
sp|P12110|CO6A2_HUMAN	P12110	15.7869	15.4577	15.3773	15.914	15.6109	15.517	16.0089	15.6869	15.3695	15.2202	15.141	15.6558	13.5373	13.3296	13.532	13.4042
sp|P12111|CO6A3_HUMAN	P12111	16.1584	15.71	16.0068	16.2578	15.8328	15.7419	16.3375	16.04	15.9066	15.6976	15.6752	16.0767	13.9303	13.8395	13.8633	13.759
sp|P12235|ADT1_HUMAN	P12235	10.7648	10.5285	10.1041	11.8399	10.6386	11.4299	9.64663	10.8871	9.70154	9.99343	11.0835	11.6932	11.4409	9.98424	11.3396	11.2277
sp|P12236|ADT3_HUMAN	P12236	10.6141	10.7738	10.5224	10.5976	12.0121	11.1547	11.1587	11.0927	11.3127	11.3034	11.2942	11.3205	10.0982	13.0132	9.35568	13.8118
sp|P12268|IMDH2_HUMAN	P12268	9.88161	9.85075	10.2268	9.47992	12.2239	12.2173	12.3238	12.2689	12.8177	12.7319	12.6942	12.7489	13.1912	13.0668	12.9378	12.8235
sp|P12270|TPR_HUMAN	P12270	NA	NA	10.5253	10.7537	11.6834	11.3217	11.929	11.7101	12.4713	12.351	12.3554	11.8548	12.2833	12.2658	12.2083	11.8411
sp|P12273|PIP_HUMAN	P12273	14.07	11.5177	11.9523	11.687	9.71916	NA	9.88362	NA	NA	NA	NA	NA	NA	NA	NA	NA
sp|P12277|KCRB_HUMAN	P12277	NA	NA	NA	12.1171	NA	NA	NA	NA	13.3414	13.1634	12.9145	13.3774	NA	NA	NA	NA
sp|P12694|ODBA_HUMAN	P12694	NA	NA	NA	NA	11.6752	NA	NA	NA	NA	NA	11.4564	NA	12.1565	12.3111	12.0842	11.7314
sp|P12814|ACTN1_HUMAN	P12814	8.97489	9.19469	10.4021	9.68217	14.314	14.2606	14.2768	14.3062	15.0316	14.8938	14.926	14.8276	13.6934	13.5789	13.5082	13.33
sp|P12955|PEPD_HUMAN	P12955	NA	NA	NA	NA	12.5913	12.5229	12.4085	12.2175	12.9922	12.9319	12.6861	12.5618	13.5398	13.4636	13.4323	13.1594
sp|P12956|XRCC6_HUMAN	P12956	10.2097	8.98075	8.93869	9.18312	12.368	12.1658	12.1921	12.3166	13.6801	13.6818	13.4935	13.2195	13.3046	13.3345	13.3043	13.3298
sp|P13010|XRCC5_HUMAN	P13010	10.102	11.4534	11.341	10.1726	12.5899	12.7252	13.0953	12.5703	13.51	13.6336	13.6993	13.3504	13.5796	13.6189	13.4771	13.5061
sp|P13073|COX41_HUMAN	P13073	11.4307	12.008	12.6373	12.3928	14.4704	14.5152	14.2369	14.1355	15.0555	15.06	15.111	15.3754	15.2247	15.2763	15.2749	15.2047
sp|P13489|RINI_HUMAN	P13489	11.392	11.3967	11.4345	10.8633	14.0977	13.9585	14.0489	14.025	14.0337	13.9416	13.9543	13.7367	14.7642	14.48	14.5393	14.4271
sp|P13497|BMP1_HUMAN	P13497	12.2314	12.1865	12.0235	12.201	NA	NA	NA	NA	NA	NA	NA	11.7856	NA	NA	NA	NA
sp|P13611|CSPG2_HUMAN	P13611	13.4274	13.3915	12.9533	13.3388	9.35193	10.5707	10.4874	9.76823	14.5078	14.3513	14.3941	14.4297	10.6726	9.7865	9.81976	10.4902
sp|P13639|EF2_HUMAN	P13639	9.72489	9.87166	9.98104	10.2047	14.4632	14.3442	14.4428	14.3571	14.5927	14.574	14.4663	14.4446	14.9488	14.8927	14.7785	14.7513
sp|P13667|PDIA4_HUMAN	P13667	10.7411	10.732	NA	NA	13.2014	13.5348	13.345	13.2808	13.9442	13.8371	13.76	13.815	13.5367	13.2791	13.1973	13.0439
sp|P13674|P4HA1_HUMAN	P13674	9.20133	9.40187	8.80244	10.1906	11.7668	11.5406	12.0454	11.7054	12.7636	12.6581	12.6392	12.486	12.6753	12.2956	12.3787	12.2245
sp|P13686|PPA5_HUMAN	P13686	NA	NA	NA	NA	NA	NA	NA	NA	NA	NA	NA	NA	13.061	12.8364	12.6529	12.6796
sp|P13693|TCTP_HUMAN	P13693	NA	NA	NA	NA	13.5072	13.2019	13.3098	13.4635	14.2687	13.9616	14.1535	14.1752	14.7967	14.8888	14.6615	14.3485
sp|P13716|HEM2_HUMAN	P13716	NA	NA	NA	NA	12.5186	12.5384	12.4844	12.4476	12.7721	NA	12.1781	NA	13.0528	13.0695	12.6257	NA
sp|P13796|PLSL_HUMAN	P13796	NA	NA	NA	NA	NA	NA	NA	NA	NA	NA	NA	NA	9.86387	NA	9.27833	9.84357
sp|P13797|PLST_HUMAN	P13797	10.2722	NA	NA	NA	13.617	13.26	13.2074	13.1575	12.7774	13.0094	13.0185	12.8749	12.6843	12.5898	12.5132	12.3108
sp|P13798|ACPH_HUMAN	P13798	NA	NA	9.70992	NA	11.9106	11.9321	11.8966	12.0127	12.5315	12.3575	12.2809	12.1273	12.9651	12.9948	12.8824	12.659
sp|P13804|ETFA_HUMAN	P13804	9.29325	9.39146	9.69634	9.62004	12.946	12.6702	12.9514	12.7811	12.5106	12.5298	12.6396	12.5991	12.6115	12.5802	12.8025	11.9527
sp|P13807|GYS1_HUMAN	P13807	NA	NA	NA	10.3968	11.62	10.5404	11.2609	10.8412	12.7152	12.6651	12.4145	11.8713	13.5357	13.452	13.4796	13.3002
sp|P13861|KAP2_HUMAN	P13861	9.56434	NA	10.875	9.48645	12.6633	12.052	12.6948	12.706	12.4507	12.6184	12.4561	12.2098	13.2243	12.9459	13.0723	12.914
sp|P13984|T2FB_HUMAN	P13984	NA	NA	NA	NA	11.4954	NA	11.8675	NA	12.7106	12.7598	12.7156	NA	13.8318	13.7038	13.544	13.4449
sp|P13987|CD59_HUMAN	P13987	16.5708	16.5728	16.4533	16.5929	15.7422	15.828	16.0981	15.9052	14.0621	13.9254	13.8382	14.125	15.6385	15.5445	15.5536	15.4404
sp|P14174|MIF_HUMAN	P14174	9.72137	10.2146	10.3296	9.83969	14.565	14.5098	14.5782	14.5715	16.7716	15.9904	15.8306	15.7108	16.8818	15.9668	15.2205	15.8164
sp|P14209|CD99_HUMAN	P14209	NA	NA	NA	NA	12.5153	12.5848	12.656	12.2769	12.8796	12.6706	13.0343	12.4567	11.4431	11.3493	11.273	11.1823
sp|P14314|GLU2B_HUMAN	P14314	NA	NA	NA	NA	13.381	13.5279	13.5587	13.5845	14.3162	14.1921	14.042	14.2541	14.0899	13.9436	13.7632	13.6716
sp|P14324|FPPS_HUMAN	P14324	10.4483	9.71698	10.7038	10.0052	12.9384	12.8146	12.8995	11.9086	12.2827	12.2189	12.2568	12.4388	12.4636	12.4494	12.4273	12.4651
sp|P14406|CX7A2_HUMAN	P14406	13.5124	13.9544	13.6955	13.5147	14.506	14.8963	14.7628	14.7138	14.8747	15.0432	15.1057	15.3291	15.3731	15.3109	15.3778	15.3422
sp|P14543|NID1_HUMAN	P14543	15.9899	15.8029	15.7181	15.7407	12.7777	12.6975	13.2299	13.1038	11.5093	11.6226	11.5366	11.2261	NA	NA	NA	NA
sp|P14550|AK1A1_HUMAN	P14550	NA	10.8463	NA	NA	14.2872	14.2695	14.5218	14.2942	13.8692	13.7514	13.6731	13.6891	13.4299	13.3028	13.0602	13.0135
sp|P14618|KPYM_HUMAN	P14618	12.5142	12.374	12.4159	12.2826	15.5919	15.4797	15.6031	15.6349	15.0632	15.0123	14.9639	15.0621	16.72	16.5686	16.5679	16.4047
sp|P14625|ENPL_HUMAN	P14625	11.5591	11.5557	11.7439	11.6257	14.7853	14.6978	14.7749	14.673	14.6978	14.6067	14.5588	14.6176	14.4713	14.3059	14.3097	14.1589
sp|P14649|MYL6B_HUMAN	P14649	13.3476	11.0188	13.396	13.1189	11.6494	11.8284	10.7858	10.6269	12.6499	12.5449	12.3995	11.9761	13.369	12.3115	12.1183	13.095
sp|P14735|IDE_HUMAN	P14735	NA	NA	11.1261	NA	11.775	11.2135	11.4465	11.4348	11.245	11.3527	11.1453	10.6149	12.2486	11.4212	11.3489	10.6055
sp|P14854|CX6B1_HUMAN	P14854	NA	NA	NA	NA	12.4915	12.1253	11.2896	12.0692	12.0271	12.569	12.8617	13.1243	12.2885	12.3006	12.3152	12.4236
sp|P14866|HNRPL_HUMAN	P14866	10.6973	10.6773	10.664	10.653	12.2325	12.1164	11.8345	12.402	13.7768	13.568	13.5611	13.4478	13.8698	13.6569	13.617	13.432
sp|P14868|SYDC_HUMAN	P14868	12.745	12.9292	12.5544	12.4374	13.489	13.5622	13.6277	13.4903	13.4135	13.528	13.5145	13.6174	14.0712	14.0432	14.0303	13.9762
sp|P14927|QCR7_HUMAN	P14927	NA	NA	NA	NA	12.1966	12.1547	12.2917	12.1338	13.4427	13.1899	13.0108	13.5862	13.8426	13.6043	13.1681	13.4237
sp|P15121|ALDR_HUMAN	P15121	NA	NA	NA	NA	10.6346	10.7032	10.8284	10.7481	11.4054	11.743	11.7195	10.6962	13.6861	13.7487	13.6291	13.7653
sp|P15144|AMPN_HUMAN	P15144	14.3564	14.0169	14.0697	14.2539	14.8411	14.7829	14.9528	14.8266	13.7481	13.6962	13.5735	13.6855	NA	NA	11.756	10.4078
sp|P15153|RAC2_HUMAN	P15153	NA	NA	NA	8.74549	10.2386	10.3928	NA	NA	8.65332	9.61153	8.60845	10.5491	15.3422	15.1589	15.2635	15.0971
sp|P15170|ERF3A_HUMAN	P15170	NA	NA	NA	NA	12.2574	12.2688	12.3271	12.6163	13.0889	12.9605	13.1134	13.0379	13.6792	13.5527	13.2603	13.1501
sp|P15289|ARSA_HUMAN	P15289	NA	NA	NA	NA	11.6814	11.7155	11.8666	11.7742	12.3537	12.1931	12.005	12.0584	NA	9.96318	9.70092	NA
sp|P15291|B4GT1_HUMAN	P15291	9.72976	NA	NA	9.58287	12.2642	NA	12.1048	12.1549	12.1759	11.8901	11.6333	11.6614	11.6064	11.868	11.409	11.3172
sp|P15309|PPAP_HUMAN	P15309	NA	NA	NA	NA	NA	NA	NA	NA	12.2727	12.6018	12.2854	NA	NA	NA	NA	NA
sp|P15311|EZRI_HUMAN	P15311	9.65753	NA	9.33407	NA	11.8848	11.9515	11.9546	12.1317	12.9539	12.8036	12.583	12.7058	12.6577	12.5134	12.4548	12.1446
sp|P15374|UCHL3_HUMAN	P15374	NA	NA	NA	NA	12.5756	12.7822	11.7524	12.2674	NA	11.8202	11.686	11.8229	11.7849	12.5814	11.8641	11.6972
sp|P15531|NDKA_HUMAN	P15531	NA	12.1312	12.1866	NA	14.2609	13.9974	13.9363	14.1301	14.5058	14.8394	14.4584	14.5061	14.916	14.895	14.8412	14.8044
sp|P15559|NQO1_HUMAN	P15559	13.3837	13.1906	13.2517	12.6262	14.8245	14.9527	14.9539	14.8598	11.4614	11.7945	11.4028	12.8243	13.4344	13.5642	13.618	13.5783
sp|P15586|GNS_HUMAN	P15586	8.94882	8.02486	8.79794	NA	13.7059	13.6938	13.7255	13.6718	13.9621	13.8394	13.835	14.0285	13.0004	13.0697	12.6529	12.8092
sp|P15848|ARSB_HUMAN	P15848	NA	NA	NA	NA	10.4349	10.6917	10.1795	10.5786	10.0912	10.2129	10.0782	10.0721	8.99219	NA	9.03869	NA
sp|P15880|RS2_HUMAN	P15880	13.404	13.646	13.3055	13.3713	15.1268	15.256	15.2736	15.1649	15.0365	15.1631	15.1358	14.9716	15.2845	15.3235	15.0975	15.0355
sp|P15924|DESP_HUMAN	P15924	10.4917	NA	NA	NA	12.3992	11.8411	11.8765	11.7838	NA	NA	NA	NA	10.3563	10.2306	NA	NA
sp|P15927|RFA2_HUMAN	P15927	10.7127	NA	10.4756	10.7525	NA	NA	NA	10.5488	10.8428	11.0981	NA	11.1305	10.8333	12.3256	11.3687	11.1405
sp|P16035|TIMP2_HUMAN	P16035	11.3187	11.2866	11.4166	11.5356	12.2603	11.6836	11.5	11.8078	11.3516	NA	NA	NA	NA	NA	NA	NA
sp|P16070|CD44_HUMAN	P16070	13.9342	13.941	13.5703	13.6966	14.5816	14.7987	14.9943	14.845	13.8139	13.8488	13.8387	14.0367	15.2511	15.0968	15.1358	15.0829
sp|P16083|NQO2_HUMAN	P16083	NA	NA	NA	NA	NA	NA	NA	NA	12.5426	12.3636	12.3678	NA	NA	NA	NA	NA
sp|P16152|CBR1_HUMAN	P16152	10.1632	9.18558	10.4268	9.16466	13.1334	13.1023	12.9697	12.0133	13.045	12.9297	13.203	13.2065	13.3805	13.2758	13.0796	12.9319
sp|P16219|ACADS_HUMAN	P16219	NA	NA	NA	NA	NA	NA	NA	NA	11.4404	11.6417	10.8723	NA	12.5962	12.5431	12.798	12.5712
sp|P16278|BGAL_HUMAN	P16278	10.9848	NA	10.5843	10.6045	12.4066	12.5138	12.0833	12.0536	13.8387	13.8072	13.7224	13.6457	14.1596	14.1091	13.9639	13.995
sp|P16401|H15_HUMAN	P16401	15.8695	15.9542	16.0506	15.876	12.6951	12.9026	12.8916	12.9506	15.581	15.591	15.4758	15.19	15.7019	15.6227	15.8231	15.7599
sp|P16403|H12_HUMAN	P16403	16.1407	16.2444	15.9611	16.2105	12.5374	11.4684	11.3941	12.0041	14.7371	14.453	14.4932	14.2045	14.628	14.5183	14.5418	14.2809
sp|P16435|NCPR_HUMAN	P16435	9.3014	NA	NA	NA	12.1564	12.3301	12.0518	12.2132	12.4558	12.4096	12.4229	12.433	13.0824	12.8026	12.7284	12.6177
sp|P16615|AT2A2_HUMAN	P16615	10.278	10.5606	10.6748	10.519	12.2692	12.4601	12.4534	12.3997	12.9105	12.8627	12.5475	12.73	12.6594	12.4793	12.6587	12.5524
sp|P16930|FAAA_HUMAN	P16930	NA	NA	NA	NA	11.023	11.2221	10.9815	11.0672	12.2508	12.3488	12.2923	12.512	13.3213	13.1421	13.099	12.8911
sp|P16949|STMN1_HUMAN	P16949	NA	NA	NA	NA	12.8696	12.7902	11.9743	11.9904	12.269	14.438	12.4772	13.6998	13.24	13.8553	13.9142	14.0936
sp|P16989|YBOX3_HUMAN	P16989	NA	NA	NA	NA	12.4407	12.3219	12.5866	12.3874	13.9156	13.8457	13.8593	13.7559	11.9849	11.7732	11.7335	11.7319
sp|P17050|NAGAB_HUMAN	P17050	NA	NA	NA	NA	NA	NA	NA	NA	11.7389	12.1585	12.2674	NA	NA	NA	NA	NA
sp|P17096|HMGA1_HUMAN	P17096	15.9404	15.8033	15.8042	15.3366	14.0297	14.4841	14.0278	14.3506	14.5807	13.6839	14.71	14.7038	13.5591	13.2123	12.7969	13.0209
sp|P17174|AATC_HUMAN	P17174	NA	10.2946	NA	NA	12.448	12.6312	12.5677	12.4079	12.2641	12.5283	12.1596	11.5739	13.3712	13.4144	13.4362	13.0818
sp|P17252|KPCA_HUMAN	P17252	9.97229	10.478	10.0253	10.0079	12.405	11.5335	11.8768	11.7683	11.7721	11.4514	11.7865	11.6511	13.3455	13.3234	13.2817	13.3401
sp|P17301|ITA2_HUMAN	P17301	NA	NA	NA	9.50357	12.8411	12.9194	12.7109	12.6732	12.9962	12.9703	12.8962	13.445	11.4454	10.8792	10.8967	11.2699
sp|P17302|CXA1_HUMAN	P17302	NA	NA	NA	NA	10.6357	10.3941	10.7135	10.6457	10.3065	10.5279	9.59405	10.0978	12.0222	11.8565	11.4945	11.3535
sp|P17405|ASM_HUMAN	P17405	NA	NA	9.52749	NA	12.2771	12.4533	11.983	12.5399	11.39	11.5509	11.8015	11.2068	10.4975	11.0422	10.5371	11.3673
sp|P17480|UBF1_HUMAN	P17480	NA	NA	NA	NA	10.0745	10.5955	10.1258	NA	11.273	10.6759	10.748	NA	11.215	10.6207	11.3129	10.6029
sp|P17612|KAPCA_HUMAN	P17612	10.6531	NA	NA	10.6151	13.0942	13.1832	13.0361	12.8311	12.3276	13.0948	12.9728	12.3097	12.5309	12.9864	13.3434	13.2216
sp|P17655|CAN2_HUMAN	P17655	10.8043	11.2562	11.1679	11.1403	13.8468	13.8564	13.9685	13.9513	13.2292	13.3345	13.3371	13.3024	14.3178	14.4606	14.3367	14.2596
sp|P17661|DESM_HUMAN	P17661	11.6494	11.4783	9.92383	11.5882	12.0283	11.8275	11.7863	11.7589	13.3764	13.3189	13.2303	13.1982	11.4263	11.6256	11.5426	11.5827
sp|P17676|CEBPB_HUMAN	P17676	12.8847	12.6367	11.7116	12.5746	11.4018	NA	11.5309	NA	12.7714	12.6339	12.1364	12.8989	14.4215	14.2053	14.3109	14.0883
sp|P17677|NEUM_HUMAN	P17677	NA	NA	NA	NA	NA	NA	NA	NA	NA	NA	NA	NA	11.3468	10.9793	11.2005	10.7852
sp|P17812|PYRG1_HUMAN	P17812	10.3916	10.6507	10.4871	10.8041	11.8347	11.3013	11.6368	11.2509	11.9037	12.154	12.1295	11.4925	12.2994	12.9337	12.5471	12.6731
sp|P17813|EGLN_HUMAN	P17813	NA	10.3931	9.80638	NA	13.02	13.0352	12.9085	13.0666	11.2389	11.2501	11.0377	11.3072	11.1942	10.8937	10.6427	10.5814
sp|P17844|DDX5_HUMAN	P17844	12.4092	12.6509	12.5844	11.9141	12.0863	12.0983	12.2326	12.0666	13.2215	13.262	13.1155	13.4241	13.6864	13.5052	13.4455	13.1504
sp|P17858|PFKAL_HUMAN	P17858	8.33866	NA	8.6132	NA	12.3576	12.1969	12.367	12.154	12.1855	12.0207	12.0306	11.6776	12.7388	12.6574	12.534	12.5031
sp|P17900|SAP3_HUMAN	P17900	NA	NA	NA	NA	12.6635	12.1972	12.4027	NA	NA	NA	NA	NA	12.8896	NA	NA	NA
sp|P17931|LEG3_HUMAN	P17931	NA	NA	NA	NA	14.6734	14.6857	14.5266	14.6687	15.163	15.1708	15.0276	15.4823	15.4638	15.3426	15.5015	15.4409
sp|P17980|PRS6A_HUMAN	P17980	10.4415	10.4933	10.2347	9.59592	13.5113	13.4912	13.4396	13.4011	13.3879	13.1978	13.0485	13.0834	13.6388	13.2599	13.2062	12.9523
sp|P17987|TCPA_HUMAN	P17987	13.0569	13.0321	12.972	12.7725	13.5811	13.5666	13.6301	13.6464	13.7621	13.62	13.6187	13.6413	14.4173	14.3645	14.3068	14.1838
sp|P18031|PTN1_HUMAN	P18031	NA	11.6492	10.8462	9.97664	12.9025	13.1833	13.0847	13.1506	12.6973	12.7567	12.5886	12.7258	13.2519	13.2682	13.2488	13.1283
sp|P18065|IBP2_HUMAN	P18065	NA	NA	NA	NA	12.7569	12.6124	12.5015	12.496	NA	NA	NA	NA	NA	NA	NA	NA
sp|P18077|RL35A_HUMAN	P18077	14.9099	15.7413	15.4785	15.2899	15.3576	15.5389	15.6957	15.6022	15.6111	15.7731	15.9558	15.7878	15.6809	15.5197	15.8201	15.51
sp|P18084|ITB5_HUMAN	P18084	9.64793	9.68941	NA	9.56868	11.5844	11.2415	11.8891	11.429	11.837	12.2834	12.5843	11.9369	10.6004	11.5179	11.8553	10.8503
sp|P18085|ARF4_HUMAN	P18085	13.8223	13.6516	13.7519	13.58	15.9583	15.7943	15.7054	15.7605	15.0539	15.1478	15.0791	14.9524	14.9223	15.045	14.724	14.9798
sp|P18124|RL7_HUMAN	P18124	14.1552	14.3623	14.1373	14.1252	15.1994	15.2484	15.2644	15.2594	15.2864	15.375	15.2913	15.4436	15.3538	15.1202	15.0655	14.9583
sp|P18206|VINC_HUMAN	P18206	10.6439	10.3469	10.2508	10.1331	14.1615	14.1231	14.2043	14.181	14.5683	14.4408	14.4883	14.5727	13.7768	13.649	13.5777	13.4199
sp|P18433|PTPRA_HUMAN	P18433	NA	NA	NA	NA	12.6918	12.8003	12.9403	12.8936	NA	NA	NA	NA	NA	NA	NA	NA
sp|P18583|SON_HUMAN	P18583	9.53195	9.23941	9.43236	NA	11.4006	11.5144	11.6831	11.0874	12.1617	12.0592	11.6108	12.0196	12.3503	12.1293	12.3768	11.9249
sp|P18621|RL17_HUMAN	P18621	11.9985	12.149	12.1278	12.7582	13.9619	14.0393	14.0322	14.189	14.0558	14.1317	14.0772	13.8984	14.3423	14.018	14.0234	13.7973
sp|P18669|PGAM1_HUMAN	P18669	NA	NA	NA	10.7428	14.0586	14.153	14.2684	14.1558	14.5407	14.3085	14.5737	13.5038	15.6746	15.5014	15.53	15.3111
sp|P18754|RCC1_HUMAN	P18754	NA	NA	NA	10.041	11.1417	11.2231	11.045	10.861	12.1528	11.9401	12.1884	11.4273	13.2965	13.4414	13.0717	13.378
sp|P18827|SDC1_HUMAN	P18827	NA	NA	NA	NA	13.073	13.5164	13.5661	13.1735	10.7932	10.4259	NA	11.0859	12.1597	11.8887	12.1905	11.5211
sp|P18859|ATP5J_HUMAN	P18859	NA	NA	NA	NA	11.3301	NA	NA	NA	11.7697	12.5599	11.929	12.617	12.2163	12.4136	12.5625	12.4257
sp|P19022|CADH2_HUMAN	P19022	NA	NA	NA	NA	NA	NA	NA	NA	NA	NA	NA	NA	9.53578	10.1389	10.0531	9.72479
sp|P19256|LFA3_HUMAN	P19256	13.5799	NA	NA	13.204	NA	NA	NA	NA	NA	NA	NA	NA	13.8674	14.0988	14.017	14.441
sp|P19320|VCAM1_HUMAN	P19320	NA	NA	NA	NA	11.686	NA	12.0244	11.9062	13.1909	13.067	12.8336	12.736	NA	NA	NA	NA
sp|P19338|NUCL_HUMAN	P19338	11.3147	10.6864	11.3627	11.0548	15.2623	15.3217	15.2602	15.2624	16.1805	16.1201	16.0587	15.9517	15.8485	15.7708	15.7827	15.5777
sp|P19367|HXK1_HUMAN	P19367	11.2978	11.1602	11.2364	11.4024	13.333	13.3728	13.5347	13.5464	12.0808	12.2504	12.3215	12.7096	14.7753	14.6185	14.5937	14.6367
sp|P19387|RPB3_HUMAN	P19387	13.492	13.1847	13.2428	13.4706	11.3839	11.6607	11.8488	11.594	12.9252	12.8092	12.5974	12.8075	13.4499	13.3239	12.9575	12.7277
sp|P19388|RPAB1_HUMAN	P19388	13.3989	13.3575	13.2489	13.3566	NA	11.7098	NA	NA	12.9654	12.889	12.4959	13.0385	13.0771	12.8565	12.9021	12.8411
sp|P19404|NDUV2_HUMAN	P19404	10.2198	11.0858	10.2243	10.3915	12.475	12.5894	12.454	10.7733	13.9709	13.7216	13.7045	13.885	13.0333	12.9573	13.1346	12.8696
sp|P19447|ERCC3_HUMAN	P19447	NA	NA	NA	NA	NA	NA	9.30286	NA	NA	NA	NA	9.66297	NA	10.5239	NA	NA
sp|P19474|RO52_HUMAN	P19474	NA	NA	NA	NA	12.7999	12.8791	NA	13.1622	NA	NA	NA	NA	12.7146	12.1113	NA	NA
sp|P19525|E2AK2_HUMAN	P19525	9.90263	10.4866	9.28094	10.3009	11.0567	11.3217	12.5128	12.4972	11.8132	10.7622	10.8104	10.5458	12.4161	12.8979	11.9642	12.1147
sp|P19623|SPEE_HUMAN	P19623	10.9119	10.4586	10.908	10.118	13.3625	13.4237	13.383	13.5095	13.5008	13.4995	13.5043	13.4633	13.5906	13.5155	13.1923	13.1602
sp|P19784|CSK22_HUMAN	P19784	12.6908	13.5143	12.7811	12.498	NA	10.9673	10.7086	NA	10.9068	12.03	11.5368	10.8141	12.3451	12.1673	12.1048	10.6752
sp|P19971|TYPH_HUMAN	P19971	NA	10.5024	NA	NA	11.5097	10.7676	11.3032	11.9246	12.2455	11.9408	12.0754	11.053	NA	NA	NA	NA
sp|P20020|AT2B1_HUMAN	P20020	NA	NA	NA	NA	11.9774	11.9839	12.2599	12.0273	11.2272	11.9202	11.7514	11.9921	12.9746	12.5777	12.8361	12.8917
sp|P20042|IF2B_HUMAN	P20042	11.3803	10.8832	11.4195	10.6423	12.8817	13.0788	12.9594	12.0173	13.5801	13.2878	12.768	13.6236	14.2239	14.2061	14.1654	14.0789
sp|P20073|ANXA7_HUMAN	P20073	NA	NA	NA	NA	12.5655	12.7648	12.7505	12.6302	12.3434	12.4577	12.3605	12.2011	12.6398	13.1753	12.8151	12.8845
sp|P20290|BTF3_HUMAN	P20290	NA	NA	NA	NA	12.912	12.0386	12.3542	12.5709	12.5601	12.8101	NA	12.5896	13.1848	13.5392	13.3467	13.5775
sp|P20337|RAB3B_HUMAN	P20337	NA	NA	10.4403	NA	NA	11.8629	10.9231	10.4111	10.9054	11.2663	11.1125	12.2153	11.9904	11.7949	11.9933	11.9097
sp|P20339|RAB5A_HUMAN	P20339	10.1461	10.2177	11.5539	10.0902	10.4263	13.3818	12.5831	10.4002	10.4559	12.4416	11.8778	10.3644	11.7977	10.166	12.4815	10.8203
sp|P20340|RAB6A_HUMAN	P20340	12.4671	NA	12.4679	12.2854	14.397	14.5295	14.561	14.5565	13.612	14.1054	13.8515	13.8234	12.3881	12.7765	12.9396	13.0091
sp|P20618|PSB1_HUMAN	P20618	NA	NA	NA	NA	13.5312	13.5261	13.4363	13.4297	13.2813	13.5255	13.4166	13.2682	13.6163	13.5331	13.5377	13.4091
sp|P20645|MPRD_HUMAN	P20645	12.1056	NA	NA	NA	13.1526	12.7784	13.3207	12.5341	NA	NA	12.4092	NA	14.0379	13.6372	13.9751	13.5346
sp|P20674|COX5A_HUMAN	P20674	NA	9.86558	NA	NA	12.0487	12.2488	12.1449	12.0887	11.4267	12.8477	12.3858	12.4132	12.9744	12.8508	12.7975	13.2506
sp|P20700|LMNB1_HUMAN	P20700	11.9951	11.8617	11.9858	12.1223	11.5234	11.7105	11.7577	11.4925	13.6179	13.7994	13.7002	13.5154	13.2853	13.3103	13.207	13.242
sp|P20810|ICAL_HUMAN	P20810	NA	NA	NA	NA	12.9974	12.937	12.9746	12.9597	13.1418	13.1564	13.0642	13.0623	13.236	12.9824	13.1391	12.8447
sp|P20908|CO5A1_HUMAN	P20908	14.5165	14.5177	14.5769	14.511	12.1645	11.6174	12.4362	12.174	11.945	10.7527	10.6104	11.6239	9.92431	NA	NA	10.0152
sp|P20936|RASA1_HUMAN	P20936	NA	NA	NA	NA	11.4077	10.9265	11.3352	11.306	11.6616	11.4648	11.4133	NA	12.5048	12.3734	12.3542	12.1862
sp|P21266|GSTM3_HUMAN	P21266	10.377	NA	11.5624	NA	11.884	11.8393	11.9072	11.9138	13.1796	13.1767	13.1237	12.9651	NA	NA	NA	NA
sp|P21281|VATB2_HUMAN	P21281	10.2001	11.0027	10.6369	NA	13.4638	13.3026	13.5788	13.4125	13.1145	13.0334	13.2086	13.1201	13.78	13.7279	13.7613	13.5498
sp|P21283|VATC1_HUMAN	P21283	NA	10.6914	NA	10.6662	10.7552	10.9109	10.6502	10.7836	11.4231	11.2508	12.1092	11.6224	13.3931	13.0885	13.3071	12.6817
sp|P21291|CSRP1_HUMAN	P21291	11.2098	NA	10.812	NA	14.1369	14.2367	14.0407	14.0622	15.1371	15.118	15.1748	15.0181	13.7643	13.5482	13.5596	13.404
sp|P21333|FLNA_HUMAN	P21333	12.5587	12.5862	12.4936	12.2174	14.4816	14.5272	14.7064	14.6042	15.1309	14.9304	14.9349	14.9184	14.576	14.3186	14.4135	14.2247
sp|P21397|AOFA_HUMAN	P21397	12.1494	12.4314	12.0506	NA	13.337	13.4727	13.8248	13.4698	14.045	13.62	14.1115	14.4367	12.239	12.393	12.3523	12.5488
sp|P21399|ACOHC_HUMAN	P21399	10.2694	10.3165	10.2372	9.61668	12.8857	12.8541	13.0103	12.9015	12.7048	12.4942	12.5595	12.2466	13.1158	13.1205	12.9005	12.8244
sp|P21589|5NTD_HUMAN	P21589	15.5024	15.566	15.2942	15.4822	15.0615	15.1112	15.327	15.2283	12.6459	12.7478	12.6078	13.2938	14.3631	14.2258	14.2584	14.1553
sp|P21796|VDAC1_HUMAN	P21796	14.1198	14.2402	14.2116	13.9753	15.8941	15.8871	16.0889	15.9311	15.5012	15.6021	15.5634	15.7501	16.2616	16.0683	16.1124	16.0781
sp|P21810|PGS1_HUMAN	P21810	11.7373	11.3893	11.1826	11.4331	13.0399	12.9367	13.1367	13.1516	13.2782	13.1092	13.1236	13.2749	NA	NA	NA	NA
sp|P21912|SDHB_HUMAN	P21912	10.7588	NA	NA	NA	13.1234	12.9341	12.9762	12.9007	12.7503	12.204	12.1872	12.9972	13.4283	13.6512	13.0858	13.2671
sp|P21926|CD9_HUMAN	P21926	10.5728	9.47317	10.1482	9.32813	10.2212	10.2247	11.2386	10.2232	10.2878	10.1174	9.92108	9.8997	13.3381	12.7969	11.5976	11.7812
sp|P21953|ODBB_HUMAN	P21953	NA	NA	NA	NA	NA	10.5395	10.1364	10.1843	11.7712	11.4235	11.561	11.2289	12.2469	12.369	12.242	12.1086
sp|P21964|COMT_HUMAN	P21964	10.6924	9.98415	10.3716	10.2712	14.143	13.8375	14.0276	14.0417	13.2757	13.2474	12.9868	12.8085	13.6286	13.4857	13.4832	13.476
sp|P21980|TGM2_HUMAN	P21980	12.0875	12.1129	12.1053	11.9247	12.831	12.9674	13.3873	13.0465	15.4514	15.378	15.3521	15.7249	13.3419	13.2191	13.3051	13.2006
sp|P22033|MUTA_HUMAN	P22033	NA	NA	NA	NA	11.586	11.2684	NA	NA	11.824	11.1896	11.5655	11.8286	12.4862	12.5489	12.1534	12.2465
sp|P22059|OSBP1_HUMAN	P22059	NA	NA	NA	NA	11.4709	12.2344	11.5353	11.4292	11.0435	12.264	12.1963	12.0819	11.9589	11.7351	10.9253	11.4977
sp|P22061|PIMT_HUMAN	P22061	NA	NA	NA	NA	11.6262	11.8123	11.5758	11.7726	11.5022	11.4477	11.3208	11.4912	12.8122	12.7954	12.7679	12.6243
sp|P22087|FBRL_HUMAN	P22087	11.1734	11.3809	11.1405	11.1209	12.6363	12.9057	12.0198	12.0073	12.9365	13.316	12.9477	12.6413	12.4295	13.1093	12.5088	12.9547
sp|P22090|RS4Y1_HUMAN	P22090	NA	NA	NA	NA	12.9458	NA	13.0691	13.0683	13.497	13.5287	12.9458	13.2318	NA	NA	NA	NA
sp|P22102|PUR2_HUMAN	P22102	10.9176	NA	NA	NA	12.2565	12.1707	12.2963	12.5544	12.3806	12.3445	12.5037	12.1312	13.2419	13.2009	13.1195	13.0304
sp|P22105|TENX_HUMAN	P22105	13.5106	13.9576	13.4629	13.324	NA	10.6763	11.086	10.5333	NA	NA	10.0291	10.4749	NA	NA	10.0948	NA
sp|P22234|PUR6_HUMAN	P22234	9.59994	9.33937	9.89407	9.26548	13.5731	13.2573	13.6331	13.6372	13.9905	13.8072	13.7626	13.4094	14.1964	13.9279	13.8587	13.8462
sp|P22307|SCP2_HUMAN	P22307	10.947	10.5339	10.6115	10.5	13.0144	13.2222	12.8463	13.1521	13.3161	13.2661	13.383	13.4048	12.125	11.822	11.027	11.4308
sp|P22314|UBA1_HUMAN	P22314	9.68258	9.33832	10.1526	8.71866	13.7154	13.5756	13.7109	13.7053	13.7435	13.5818	13.444	13.6164	13.912	13.6242	13.591	13.5779
sp|P22413|ENPP1_HUMAN	P22413	NA	NA	NA	NA	10.6048	10.3906	10.6222	10.6291	12.4517	12.6302	12.3234	12.1855	11.0393	11.5514	11.2326	11.0052
sp|P22570|ADRO_HUMAN	P22570	NA	9.78748	9.66861	9.70015	11.4776	11.0052	11.3486	10.9261	10.1948	10.8752	11.0173	11.7098	12.2915	12.5994	11.3132	11.6463
sp|P22626|ROA2_HUMAN	P22626	11.2282	10.7253	10.7679	10.65	13.1633	13.5396	13.3605	13.2916	14.6363	14.6918	14.6352	14.5057	14.4861	14.4407	14.4766	14.3892
sp|P22692|IBP4_HUMAN	P22692	13.8416	13.5475	13.306	13.2095	11.4855	11.4062	11.3797	11.2961	10.8063	11.255	NA	11.3627	NA	NA	NA	NA
sp|P22695|QCR2_HUMAN	P22695	11.4105	11.6369	10.9602	10.9716	12.8851	12.8944	13.0071	12.965	13.3258	13.227	13.2303	13.4957	13.8902	13.7089	13.6602	13.637
sp|P23141|EST1_HUMAN	P23141	NA	NA	NA	NA	12.1849	12.2039	NA	12.2081	NA	NA	NA	NA	NA	NA	NA	NA
sp|P23142|FBLN1_HUMAN	P23142	13.821	13.7741	13.3464	13.7024	12.2913	12.255	12.4583	12.3947	15.325	15.1438	15.0934	14.9913	NA	NA	NA	NA
sp|P23193|TCEA1_HUMAN	P23193	11.2004	NA	NA	NA	NA	10.977	NA	10.5082	12.0413	11.8567	11.1278	NA	12.0734	11.7879	11.6777	11.6157
sp|P23219|PGH1_HUMAN	P23219	11.1191	10.596	NA	10.3696	NA	NA	NA	NA	13.4107	13.2699	13.1706	13.1652	NA	NA	NA	NA
sp|P23246|SFPQ_HUMAN	P23246	10.5842	9.59341	9.85484	10.3824	12.8912	12.9098	12.9701	12.9644	13.9258	13.9197	13.9603	13.5012	14.0299	14.0401	14.0224	13.7593
sp|P23258|TBG1_HUMAN	P23258	NA	NA	NA	NA	NA	NA	NA	NA	NA	NA	NA	NA	12.1146	11.296	12.0014	NA
sp|P23284|PPIB_HUMAN	P23284	12.6795	12.413	12.5021	12.263	15.67	15.7805	15.7792	15.6682	15.8966	15.8789	15.7769	15.9518	15.0241	15.0545	14.8132	14.86
sp|P23368|MAOM_HUMAN	P23368	NA	NA	NA	NA	11.8951	11.9836	11.741	10.9264	12.0937	11.2373	11.5687	11.8893	10.8234	NA	10.7409	10.807
sp|P23381|SYWC_HUMAN	P23381	NA	10.3784	NA	10.9424	13.0942	13.0609	13.2453	13.0533	14.3466	14.07	14.0873	13.754	12.839	12.7309	12.2542	12.3829
sp|P23396|RS3_HUMAN	P23396	14.2375	14.4664	14.2299	14.2233	15.2316	15.3677	15.3839	15.2811	15.5289	15.5765	15.5766	15.6407	15.5779	15.5642	15.5384	15.5206
sp|P23470|PTPRG_HUMAN	P23470	NA	NA	NA	NA	NA	NA	NA	11.2898	12.3359	12.328	11.9507	12.1379	10.5803	NA	NA	NA
sp|P23497|SP100_HUMAN	P23497	10.8494	NA	10.5269	10.7668	11.4111	11.3867	11.141	11.433	11.5572	11.3216	11.4409	11.2218	11.9559	11.8636	11.7222	11.6665
sp|P23526|SAHH_HUMAN	P23526	NA	9.69897	9.88582	8.74178	13.9536	14.1143	13.9974	14.0501	13.2963	13.3196	13.3506	13.5512	14.0254	14.0384	13.9175	14.0284
sp|P23528|COF1_HUMAN	P23528	12.7875	12.7357	12.6558	12.3174	15.7703	15.7816	15.6748	15.6944	16.209	16.0961	16.1224	16.0951	16.3574	16.3761	16.149	16.0992
sp|P23588|IF4B_HUMAN	P23588	NA	NA	NA	NA	12.2852	12.5552	12.6139	12.6772	12.3198	12.7119	12.347	12.2056	12.9048	12.7498	13.1658	13.1063
sp|P23634|AT2B4_HUMAN	P23634	11.969	11.7581	11.5426	10.7238	12.8335	12.6492	13.0137	12.7656	13.0099	12.9058	12.8892	13.0235	13.8769	13.6007	13.6359	13.3227
sp|P23786|CPT2_HUMAN	P23786	NA	NA	NA	NA	10.524	10.3815	NA	11.2412	11.1884	11.3464	11.7689	11.0011	11.1703	11.1817	11.0999	NA
sp|P23919|KTHY_HUMAN	P23919	NA	11.0504	10.9446	NA	11.13	11.021	10.8881	11.3337	11.5317	11.9971	11.575	10.9774	13.0858	13.1196	12.8441	12.8628
sp|P23921|RIR1_HUMAN	P23921	NA	NA	NA	NA	NA	11.4323	NA	NA	NA	11.5059	NA	NA	11.8086	12.1233	12.1799	11.2673
sp|P24043|LAMA2_HUMAN	P24043	12.2459	11.4666	11.7233	12.2955	11.6271	11.6875	12.2885	11.7	NA	8.71464	9.66342	10.3622	NA	NA	NA	NA
sp|P24534|EF1B_HUMAN	P24534	11.5772	10.7741	10.8363	10.9684	14.086	14.0642	13.7127	13.9913	13.7117	14.0986	14.2068	14.2588	14.6404	14.4165	14.3773	14.3964
sp|P24539|AT5F1_HUMAN	P24539	10.0034	NA	NA	9.9848	12.1186	11.8488	11.4542	11.9615	11.1378	11.6194	11.7262	12.3265	12.6051	12.3766	12.4437	12.9446
sp|P24593|IBP5_HUMAN	P24593	12.3391	NA	NA	12.0695	NA	NA	NA	NA	13.6227	NA	NA	13.2814	NA	NA	NA	NA
sp|P24666|PPAC_HUMAN	P24666	11.0558	11.1116	10.9679	10.869	12.5257	12.8005	12.5217	12.5455	12.7053	12.7656	13.4429	12.7238	14.055	13.864	13.4742	13.723
sp|P24752|THIL_HUMAN	P24752	NA	10.2702	NA	NA	12.4381	12.4255	12.677	12.5669	12.8399	12.8088	12.6574	12.8725	12.7166	12.7443	12.5787	12.6601
sp|P24821|TENA_HUMAN	P24821	13.35	13.0337	13.5754	13.6962	7.02597	NA	9.67489	NA	13.8441	13.5406	13.4838	13.6232	14.0463	14.0124	14.0395	13.9421
sp|P24844|MYL9_HUMAN	P24844	16.0722	16.37	15.9345	15.6587	11.1655	10.048	11.1662	10.0693	13.604	13.4928	13.3514	11.3345	12.8303	12.557	12.5738	12.3339
sp|P24928|RPB1_HUMAN	P24928	12.8409	12.4797	12.5564	12.1096	NA	9.45148	9.33422	9.56099	10.8229	10.3975	10.6023	10.8979	11.6055	11.3261	11.0282	10.2273
sp|P25205|MCM3_HUMAN	P25205	10.0016	10.3521	9.91382	10.0059	NA	9.23257	9.75155	NA	10.9249	11.0155	10.9565	9.82833	13.406	13.3374	13.1942	13.1041
sp|P25311|ZA2G_HUMAN	P25311	12.6479	10.874	11.4551	10.8654	NA	NA	NA	NA	NA	NA	NA	NA	NA	NA	NA	NA
sp|P25325|THTM_HUMAN	P25325	NA	NA	NA	NA	NA	NA	12.4544	12.6377	12.8251	12.9268	12.4309	12.8627	NA	NA	NA	NA
sp|P25398|RS12_HUMAN	P25398	10.2913	10.4489	11.5383	10.0235	14.1693	14.0985	14.0118	14.1653	14.2848	14.7004	14.5889	14.924	14.607	14.6956	14.9315	14.8742
sp|P25445|TNR6_HUMAN	P25445	8.86184	NA	NA	9.91521	12.0357	9.74539	11.5832	10.5313	9.94233	10.1318	11.2634	11.5662	9.33245	9.5933	9.30424	9.31505
sp|P25685|DNJB1_HUMAN	P25685	NA	NA	NA	NA	11.9159	11.7443	11.6834	11.2404	12.5165	12.3867	12.1327	12.4008	13.1345	12.7145	13.0813	12.7268
sp|P25705|ATPA_HUMAN	P25705	12.8477	12.4322	12.845	12.7777	14.8084	14.7758	15.0196	14.8072	15.2014	15.0803	15.0955	15.0955	15.4387	15.4215	15.3418	15.4343
sp|P25774|CATS_HUMAN	P25774	15.7439	15.111	15.7051	15.9146	15.4431	15.5614	15.7943	15.5836	15.3095	12.633	14.898	15.7531	12.9759	13.1724	13.3092	12.9325
sp|P25786|PSA1_HUMAN	P25786	NA	NA	9.71266	NA	13.2693	13.3418	13.2719	13.2854	13.4218	13.4601	13.4402	13.4796	13.3485	13.4157	13.3464	13.2941
sp|P25787|PSA2_HUMAN	P25787	NA	NA	NA	NA	13.1725	12.9908	12.9977	12.9955	13.4152	13.314	13.2799	13.2209	13.4969	13.3932	13.0604	12.9565
sp|P25788|PSA3_HUMAN	P25788	NA	NA	NA	NA	14.3576	14.3755	14.5007	14.4253	14.5023	14.4951	14.605	14.5481	14.5805	14.4917	14.5415	14.2054
sp|P25789|PSA4_HUMAN	P25789	10.5503	NA	NA	NA	14.311	14.319	14.5089	14.3339	14.6132	14.6676	14.4949	14.502	14.6549	14.6012	14.4259	14.352
sp|P25940|CO5A3_HUMAN	P25940	13.45	13.359	13.39	13.0581	NA	NA	NA	NA	NA	NA	NA	NA	NA	NA	NA	NA
sp|P26006|ITA3_HUMAN	P26006	11.6425	11.1358	10.9087	11.2281	13.8788	13.9764	13.9604	13.9239	10.9204	11.6312	10.9375	10.9622	14.8185	14.9561	14.9726	14.9165
sp|P26022|PTX3_HUMAN	P26022	13.0414	12.626	12.7638	13.0811	10.9473	11.0205	11.0058	11.525	13.0545	13.1552	13.4095	12.4761	8.69798	8.6384	9.23759	9.38518
sp|P26038|MOES_HUMAN	P26038	11.9061	11.1556	10.8965	10.7316	14.1958	14.2412	14.1612	14.062	14.2169	13.9555	14.1642	14.0827	13.7219	13.7868	13.3784	13.4844
sp|P26196|DDX6_HUMAN	P26196	10.259	9.96129	10.348	9.96717	11.7505	11.7837	12.1599	11.9653	13.0697	13.0641	12.8221	12.8317	12.9186	12.7868	12.7593	12.6668
sp|P26358|DNMT1_HUMAN	P26358	14.8011	15.0223	14.9364	14.4237	15.0573	15.2055	15.2856	15.1776	14.2496	14.8273	14.4016	14.5254	NA	13.9819	14.2562	NA
sp|P26368|U2AF2_HUMAN	P26368	10.3329	11.0333	9.91453	10.6005	12.5366	12.2855	12.3814	12.3813	13.5784	13.4921	13.4275	13.2157	14.0311	13.9851	13.8738	13.6885
sp|P26373|RL13_HUMAN	P26373	15.1659	15.4535	15.1737	15.0089	16.3602	16.4428	16.4274	16.3565	16.3027	16.2044	16.1159	16.3523	15.9773	15.9473	15.8907	15.7866
sp|P26440|IVD_HUMAN	P26440	NA	NA	NA	NA	11.5601	11.453	12.0348	12.0039	11.9218	12.1527	11.5944	12.0879	12.0829	11.7303	11.8749	11.6988
sp|P26572|MGAT1_HUMAN	P26572	NA	NA	NA	NA	12.8875	12.9614	12.7918	12.7723	11.177	11.1276	10.9267	11.6411	NA	NA	NA	NA
sp|P26583|HMGB2_HUMAN	P26583	NA	NA	NA	NA	NA	NA	12.0512	NA	13.4923	12.782	13.3571	12.5173	12.2784	13.1958	12.2813	12.4593
sp|P26599|PTBP1_HUMAN	P26599	9.27699	8.54924	8.67011	8.8948	12.5887	12.3208	12.4813	12.6066	13.9822	13.8114	14.0016	13.6635	13.8974	13.7196	13.5948	13.7171
sp|P26639|SYTC_HUMAN	P26639	9.75973	9.58786	9.85512	9.44448	12.4286	12.5557	12.5143	12.5886	12.9524	12.9491	12.8067	12.2185	13.4898	13.484	13.2703	13.2037
sp|P26640|SYVC_HUMAN	P26640	11.048	10.9711	10.9905	11.034	13.0697	13.0618	13.1752	12.9504	13.2052	13.1734	13.0535	13.1657	12.6487	12.5138	12.4365	12.1996
sp|P26641|EF1G_HUMAN	P26641	11.1168	11.1896	11.2179	11.2521	14.0056	14.002	13.7182	13.879	14.4135	14.5158	14.3816	13.6166	15.0848	14.9482	14.8159	14.7438
sp|P26885|FKBP2_HUMAN	P26885	NA	NA	NA	NA	13.344	13.1925	13.3015	13.3126	12.8939	12.9376	12.4502	12.8851	12.6714	12.7065	12.8771	12.6945
sp|P27105|STOM_HUMAN	P27105	12.8329	12.996	12.5313	11.8523	13.8224	13.2157	13.7166	13.7292	13.9697	13.6412	13.5904	14.3774	11.3361	10.2255	11.2212	11.036
sp|P27348|1433T_HUMAN	P27348	10.9389	9.62043	10.1453	10.2361	14.0763	14.0878	14.0611	14.0106	14.4492	14.5046	14.4297	14.3105	14.8825	14.9597	14.9766	14.8743
sp|P27361|MK03_HUMAN	P27361	11.7881	11.3175	11.7078	11.5675	13.7242	14.0363	13.7437	13.8872	12.4816	12.6155	12.4648	12.2387	13.5389	12.8294	13.0938	12.9692
sp|P27449|VATL_HUMAN	P27449	12.6461	12.397	12.0449	12.2834	12.9816	13.0658	13.2634	13.1283	NA	11.106	11.5193	12.0961	NA	NA	NA	NA
sp|P27487|DPP4_HUMAN	P27487	NA	NA	NA	NA	NA	NA	NA	NA	NA	NA	NA	NA	12.3631	12.8154	12.5895	12.6848
sp|P27635|RL10_HUMAN	P27635	11.6535	11.1434	11.6477	11.0861	13.47	11.6257	13.5478	13.303	14.7852	14.0692	14.0012	14.4186	14.5619	13.9666	11.8431	13.8393
sp|P27658|CO8A1_HUMAN	P27658	13.2743	13.5029	12.9774	12.7069	10.3259	10.3874	9.24853	9.41447	11.8004	12.0094	11.7223	10.9274	NA	NA	9.02621	NA
sp|P27694|RFA1_HUMAN	P27694	11.2007	10.3812	10.483	11.6487	NA	NA	NA	NA	12.3567	12.1165	11.9273	11.5551	12.6182	12.5223	12.3406	12.5289
sp|P27695|APEX1_HUMAN	P27695	10.3556	10.3314	9.70712	9.92343	12.6269	11.7345	13.1947	12.6893	13.9729	13.8471	14.016	13.6351	13.1682	13.3791	13.5604	13.2832
sp|P27701|CD82_HUMAN	P27701	NA	NA	NA	NA	15.0049	15.0606	14.9008	14.8558	12.868	13.0711	13.1994	13.1381	13.739	14.14	13.9755	14.0451
sp|P27708|PYR1_HUMAN	P27708	9.75947	8.86627	9.35759	9.40689	12.4783	12.3557	12.5886	12.6012	12.5261	12.4343	12.251	12.1203	12.924	12.8699	12.8123	12.7555
sp|P27797|CALR_HUMAN	P27797	9.78632	9.6139	9.85177	9.27847	14.5922	14.3301	14.6011	14.5514	14.3033	14.2713	14.1984	14.0463	14.1692	13.8941	13.6544	13.6482
sp|P27816|MAP4_HUMAN	P27816	10.5019	10.1573	10.2824	10.2151	13.938	13.9368	14.0826	14.1037	14.3834	14.3044	14.2874	14.2074	13.7639	13.5318	13.5613	13.3107
sp|P27824|CALX_HUMAN	P27824	11.1902	11.232	10.8388	10.9376	14.1223	14.1536	14.0934	14.2605	13.6465	13.4974	13.5141	13.5874	13.9501	13.2077	13.095	13.2417
sp|P28062|PSB8_HUMAN	P28062	NA	NA	NA	NA	12.6777	12.584	12.646	12.7554	11.373	11.8861	11.7552	11.6103	11.2615	11.5004	11.4734	11.1947
sp|P28065|PSB9_HUMAN	P28065	11.4178	NA	NA	NA	13.3525	13.721	13.3947	13.7639	NA	11.8498	11.0899	11.1469	12.5392	11.3026	12.6596	NA
sp|P28066|PSA5_HUMAN	P28066	9.66568	NA	NA	NA	13.9979	14.1008	13.9651	14.0208	14.2011	14.2634	14.1846	14.2397	14.6936	14.6953	14.5322	14.3907
sp|P28070|PSB4_HUMAN	P28070	NA	NA	NA	NA	13.0213	13.0557	13.0705	12.9488	12.9093	13.1067	12.9561	12.7714	12.2204	12.7148	13.0077	12.9872
sp|P28072|PSB6_HUMAN	P28072	NA	NA	NA	NA	13.7504	13.9052	13.848	13.8036	14.0754	14.4057	14.194	14.3455	14.1349	14.1453	14.0465	13.9959
sp|P28074|PSB5_HUMAN	P28074	NA	NA	NA	NA	12.1043	12.2802	12.196	12.2517	13.0054	12.9539	13.0528	12.8954	13.0147	13.0063	13.1192	12.8298
sp|P28161|GSTM2_HUMAN	P28161	NA	NA	NA	NA	11.8726	11.3351	11.3201	11.43	11.9999	12.4491	12.1688	12.0063	12.1719	12.4533	11.376	12.0384
sp|P28288|ABCD3_HUMAN	P28288	10.4848	11.0043	10.9541	10.8212	12.0293	11.7146	11.9847	11.9835	12.6687	13.1853	12.7391	12.0951	10.9531	11.0029	10.1209	10.8718
sp|P28290|ITPI2_HUMAN	P28290	NA	NA	NA	NA	11.8491	NA	NA	11.7487	NA	NA	NA	NA	12.2491	12.1004	NA	12.1297
sp|P28300|LYOX_HUMAN	P28300	11.6941	NA	10.5079	NA	12.4069	12.7122	12.6654	12.2604	13.581	13.7227	13.5406	14.1587	13.5539	12.9656	13.0781	13.0149
sp|P28331|NDUS1_HUMAN	P28331	10.1437	10.3716	9.93833	10.7769	12.4697	12.2928	12.3037	12.2253	12.9337	13.1476	12.9063	13.2025	12.7838	12.5349	12.6458	12.4397
sp|P28370|SMCA1_HUMAN	P28370	NA	NA	NA	NA	NA	NA	10.4837	10.8378	11.8757	11.8727	11.5337	11.1889	12.3025	12.2421	11.422	11.991
sp|P28482|MK01_HUMAN	P28482	12.1073	NA	11.5676	10.6524	13.5214	13.8243	13.5135	13.6091	13.3225	13.3685	13.3561	13.2031	13.4193	13.2208	13.3948	13.4257
sp|P28799|GRN_HUMAN	P28799	11.2493	11.1845	NA	10.0204	10.835	10.8724	10.6617	10.7906	11.5372	11.6569	10.8536	NA	11.8165	12.0484	11.9867	12.2099
sp|P28838|AMPL_HUMAN	P28838	NA	9.3973	10.1904	9.73249	13.5229	13.4829	13.4591	13.4764	12.8443	12.5824	12.629	11.928	13.4028	13.3758	13.2902	13.1526
sp|P29144|TPP2_HUMAN	P29144	10.1595	NA	NA	NA	11.6705	11.4918	11.9167	11.8853	11.7904	12.0274	11.942	11.9102	12.739	12.6466	12.3385	12.4383
sp|P29218|IMPA1_HUMAN	P29218	NA	NA	NA	NA	11.4565	11.6259	11.8667	11.4209	12.2841	12.118	11.9447	12.1913	12.9418	12.7273	12.8461	12.1001
sp|P29279|CCN2_HUMAN	P29279	12.3425	12.6705	12.683	11.8295	12.1746	12.2387	12.3848	12.2074	11.3624	11.3888	11.0559	12.1341	NA	NA	NA	NA
sp|P29317|EPHA2_HUMAN	P29317	9.96704	10.7684	10.6886	10.5567	11.8323	11.6639	12.0034	11.6193	NA	NA	NA	NA	NA	NA	NA	9.70726
sp|P29401|TKT_HUMAN	P29401	9.47184	9.46909	8.59323	8.74279	13.9458	13.8316	13.9346	13.8175	13.7863	13.8731	13.8954	13.4027	13.587	13.6884	13.487	13.4635
sp|P29466|CASP1_HUMAN	P29466	NA	NA	NA	NA	12.1211	11.9743	11.8224	12.129	12.0234	12.051	11.9724	12.0849	NA	NA	NA	NA
sp|P29590|PML_HUMAN	P29590	9.8317	10.0619	10.1453	10.2637	14.0684	14.0125	14.0865	14.1752	12.1208	12.0372	12.5191	12.017	11.1897	10.6533	10.1502	10.3962
sp|P29692|EF1D_HUMAN	P29692	9.79781	10.2358	10.0782	9.54894	13.2963	13.6472	13.4424	13.3848	14.0407	13.9764	13.9547	13.9775	14.123	14.0467	14.0365	13.9263
sp|P29966|MARCS_HUMAN	P29966	9.44179	9.82835	8.52627	8.63598	13.2604	13.3351	13.2366	13.4786	14.6245	14.5447	14.5852	14.2	13.0329	12.9659	13.0405	12.8219
sp|P29992|GNA11_HUMAN	P29992	NA	NA	11.7891	11.677	12.6951	12.2409	11.9869	12.7203	13.44	11.9768	13.4459	NA	12.6391	12.7257	12.5337	11.656
sp|P30038|AL4A1_HUMAN	P30038	NA	NA	NA	NA	12.4155	NA	NA	NA	12.6738	NA	12.5448	13.1445	NA	NA	NA	NA
sp|P30040|ERP29_HUMAN	P30040	NA	NA	NA	NA	13.3281	13.3261	13.233	13.3286	14.5875	14.5463	14.4446	14.0904	14.4023	14.3839	14.2717	13.9435
sp|P30041|PRDX6_HUMAN	P30041	10.2511	9.79224	10.6631	10.5411	15.2042	15.1581	15.1482	15.1422	14.4542	14.7504	14.5691	14.5083	14.0727	14.2528	14.0659	14.0875
sp|P30043|BLVRB_HUMAN	P30043	10.4839	10.1639	10.0942	10.1417	13.0028	12.7009	12.6178	12.981	12.5419	12.2343	12.2767	11.2655	14.2151	14.1932	14.1754	14.1226
sp|P30044|PRDX5_HUMAN	P30044	10.8775	10.5144	10.939	10.9116	14.3895	14.3397	14.2426	14.3047	14.551	14.6288	14.6198	14.3539	14.4499	14.5586	14.4348	14.3832
sp|P30046|DOPD_HUMAN	P30046	NA	NA	NA	NA	12.7923	NA	NA	NA	12.9476	12.8578	12.9356	12.5237	14.3925	14.6857	14.3373	13.6024
sp|P30048|PRDX3_HUMAN	P30048	10.1295	9.87239	10.0238	9.75505	13.399	13.4577	13.0727	13.0978	13.7736	13.7772	13.7596	13.8988	13.8505	13.8244	13.7811	13.7279
sp|P30049|ATPD_HUMAN	P30049	12.5766	12.3484	12.4924	12.3167	13.4379	13.6595	13.1208	13.4203	14.2892	14.6212	14.4192	14.6756	14.8319	14.9394	14.8331	14.8424
sp|P30050|RL12_HUMAN	P30050	13.4242	13.4713	13.2963	13.349	15.0204	15.1213	15.0851	15.0508	15.7459	15.6942	15.5475	15.5831	15.7579	15.4646	15.3939	15.1177
sp|P30084|ECHM_HUMAN	P30084	NA	NA	NA	NA	12.5473	12.323	12.8104	12.4399	12.8406	13.0399	12.8154	12.6129	13.4848	13.3916	13.1239	12.9507
sp|P30085|KCY_HUMAN	P30085	9.84429	9.82388	10.389	9.29978	13.0697	12.8895	12.6707	12.9249	11.6371	12.0984	11.8605	11.502	11.4134	11.6338	12.0103	11.7342
sp|P30086|PEBP1_HUMAN	P30086	NA	NA	NA	10.2795	13.6754	13.9851	13.9662	13.8261	12.8666	12.987	12.7007	12.4956	13.3486	13.5853	13.282	13.0235
sp|P30101|PDIA3_HUMAN	P30101	11.6218	11.3939	11.1448	11.1723	15.688	15.7015	15.7394	15.6783	15.359	15.2459	15.2097	15.2629	14.7148	14.6975	14.67	14.4162
sp|P30153|2AAA_HUMAN	P30153	NA	NA	10.5529	NA	13.1654	13.2679	13.2924	13.2446	13.694	13.6838	13.6133	13.608	13.8963	13.8385	13.7702	13.6416
sp|P30419|NMT1_HUMAN	P30419	NA	NA	NA	NA	11.7303	11.8615	12.589	12.6018	10.7212	11.8928	10.6807	11.3869	12.4847	11.6543	12.0533	11.4109
sp|P30519|HMOX2_HUMAN	P30519	NA	NA	NA	NA	11.9193	11.3105	11.3516	11.7373	12.0067	11.9764	11.7729	12.1411	NA	NA	NA	NA
sp|P30520|PURA2_HUMAN	P30520	10.1167	9.72552	10.1161	10.0263	11.8892	11.8118	11.8358	11.5632	12.5343	12.4619	12.0132	11.6717	12.9607	12.6106	12.5493	12.1606
sp|P30533|AMRP_HUMAN	P30533	NA	NA	NA	9.64359	11.7829	12.0277	11.9399	11.8811	12.6947	12.8657	12.3262	12.4025	12.6283	12.4671	12.5378	12.5644
sp|P30536|TSPO_HUMAN	P30536	12.8585	13.0918	12.8556	13.078	14.3553	14.5964	14.4979	14.5548	14.0244	13.8319	13.9083	14.0756	13.9277	13.9399	13.5984	13.7205
sp|P30566|PUR8_HUMAN	P30566	9.78355	9.64299	9.99035	NA	12.2087	12.417	12.3413	12.3557	12.6073	12.5183	12.3316	12.5081	12.6473	12.5606	12.4145	12.1592
sp|P30622|CLIP1_HUMAN	P30622	10.0271	10.2282	10.3429	9.99646	11.5263	11.8428	11.169	11.6034	11.6685	11.5047	11.3669	11.3836	11.932	11.032	11.7033	11.4347
sp|P30626|SORCN_HUMAN	P30626	NA	NA	NA	NA	13.0383	12.9169	12.9595	12.9273	13.208	13.2266	13.0381	13.0382	13.9414	14.0784	13.7681	13.7366
sp|P30740|ILEU_HUMAN	P30740	NA	NA	NA	NA	12.2494	12.2035	NA	11.6913	12.8866	12.6492	12.6756	12.7881	12.7503	13.2408	12.6058	12.6567
sp|P30825|CTR1_HUMAN	P30825	NA	NA	NA	NA	NA	11.5958	NA	11.6092	NA	NA	NA	NA	NA	12.4414	12.0937	12.0499
sp|P30837|AL1B1_HUMAN	P30837	NA	NA	NA	NA	11.6379	11.5528	11.8685	11.7455	12.6313	12.4583	12.3261	12.4907	12.6706	12.4326	12.5431	12.2993
sp|P30876|RPB2_HUMAN	P30876	12.6252	12.4241	12.7754	11.9053	9.45244	NA	NA	NA	10.8991	11.8504	11.2565	10.7842	11.9324	11.8712	12.1019	11.8796
sp|P31040|SDHA_HUMAN	P31040	9.41651	9.4843	9.37701	NA	13.0701	12.9364	12.9661	13.1229	12.2544	12.1719	12.2497	11.9526	13.2602	13.222	12.9863	13.1578
sp|P31150|GDIA_HUMAN	P31150	NA	NA	NA	NA	13.4198	13.3279	13.3921	13.2192	13.3699	13.3907	13.3104	13.2025	12.9155	13.1564	12.825	12.7462
sp|P31151|S10A7_HUMAN	P31151	13.0035	13.8441	11.1633	11.4213	NA	NA	NA	NA	NA	NA	NA	NA	NA	NA	NA	NA
sp|P31153|METK2_HUMAN	P31153	NA	11.3707	NA	NA	13.4501	12.9397	13.2365	13.5483	13.6912	13.0465	12.9249	12.661	13.7821	13.4704	13.7362	13.7876
sp|P31323|KAP3_HUMAN	P31323	NA	NA	NA	NA	NA	NA	NA	NA	11.2577	10.9551	10.9989	10.5105	10.9176	10.7068	10.9423	10.4198
sp|P31431|SDC4_HUMAN	P31431	NA	10.3989	10.8434	NA	12.1026	11.948	11.0255	10.8901	12.0173	11.686	12.2574	12.9726	11.9515	11.7713	12.2854	12.4325
sp|P31483|TIA1_HUMAN	P31483	NA	NA	NA	NA	10.0692	NA	10.0591	NA	NA	9.37864	11.3254	11.7048	NA	NA	10.4275	10.7633
sp|P31689|DNJA1_HUMAN	P31689	9.92847	10.1576	9.89535	NA	11.0299	11.2143	10.8972	11.2097	11.6455	12.0566	11.5799	11.3815	12.2356	11.823	12.1402	11.8429
sp|P31749|AKT1_HUMAN	P31749	NA	NA	NA	NA	11.4454	NA	11.8556	11.8918	12.092	11.7319	11.7517	11.8312	11.9763	11.8517	11.6354	11.7942
sp|P31930|QCR1_HUMAN	P31930	10.3426	10.2874	10.0508	10.3293	13.0786	13.201	12.956	12.8054	13.5298	13.6716	13.6559	13.4639	14.0512	14.1249	13.8826	13.8682
sp|P31937|3HIDH_HUMAN	P31937	NA	NA	NA	NA	12.6984	12.7634	12.9722	13.539	12.5565	12.5573	12.7509	12.2102	12.4117	12.3702	12.1238	12.4363
sp|P31939|PUR9_HUMAN	P31939	9.67485	10.4871	10.2915	9.77588	13.281	13.2822	13.2443	13.2205	13.154	13.1161	13.0776	13.0811	13.4387	13.3564	13.2146	13.0655
sp|P31942|HNRH3_HUMAN	P31942	10.3637	9.8787	10.1673	NA	12.01	10.7769	12.0009	12.0844	13.7819	13.8252	13.5591	13.0145	14.128	13.9752	13.8611	13.9091
sp|P31943|HNRH1_HUMAN	P31943	11.0654	10.6954	10.8196	10.6736	11.7736	12.4778	12.5398	12.3659	13.5706	13.3112	13.0956	13.3275	14.3975	14.1611	13.8508	13.693
sp|P31944|CASPE_HUMAN	P31944	13.6826	NA	12.1878	11.8987	NA	NA	NA	NA	NA	NA	NA	NA	NA	NA	NA	NA
sp|P31946|1433B_HUMAN	P31946	9.89986	9.74708	8.98738	8.98782	13.571	13.5401	13.5892	13.6486	13.8274	13.8305	13.6956	13.6114	14.6747	14.465	14.2908	14.2125
sp|P31948|STIP1_HUMAN	P31948	NA	NA	NA	6.7579	12.5822	12.5515	12.4835	12.5921	12.7171	12.7301	12.8088	12.771	13.9695	13.876	13.7517	13.5368
sp|P31949|S10AB_HUMAN	P31949	11.1204	11.0051	NA	10.1396	16.5158	16.3517	16.0688	16.2233	15.783	15.9387	15.8936	15.2902	16.1994	16.4775	16.2499	16.428
sp|P32119|PRDX2_HUMAN	P32119	10.0892	10.1507	NA	9.52328	13.0536	12.8189	12.8026	12.5004	14.8356	14.6253	14.6598	14.7077	13.7509	13.8639	13.7797	13.4981
sp|P32189|GLPK_HUMAN	P32189	NA	NA	NA	NA	NA	NA	NA	NA	NA	NA	12.1935	NA	10.9741	11.0256	10.4951	10.7754
sp|P32455|GBP1_HUMAN	P32455	NA	NA	NA	NA	12.0228	12.3295	11.5698	12.1187	12.0578	11.8128	11.8028	12.2676	NA	NA	NA	NA
sp|P32969|RL9_HUMAN	P32969	12.0082	11.5981	12.3885	11.6323	13.4876	13.1456	13.4974	13.3448	13.6169	13.1552	13.5801	13.5517	13.8187	13.6994	13.6591	13.6531
sp|P33121|ACSL1_HUMAN	P33121	9.90907	NA	9.34364	NA	12.6503	12.4399	12.621	12.3813	10.4691	10.3879	10.1464	10.6935	11.908	11.7985	11.7084	11.613
sp|P33176|KINH_HUMAN	P33176	10.3561	10.5936	10.5791	10.307	13.1336	13.163	13.0942	13.1684	12.908	13.0452	12.8097	12.9311	12.9461	12.8736	12.7273	12.5393
sp|P33240|CSTF2_HUMAN	P33240	NA	NA	NA	NA	10.1953	10.4896	11.1568	11.0836	12.3227	11.7446	11.2185	11.0036	12.2486	12.1241	12.25	11.6894
sp|P33316|DUT_HUMAN	P33316	NA	NA	NA	NA	NA	10.2837	10.8592	NA	11.1853	11.8609	11.3429	10.2966	12.6431	13.1808	13.1746	13.0224
sp|P33527|MRP1_HUMAN	P33527	9.43404	8.8556	8.66102	8.6049	8.80347	8.24335	10.0065	8.19306	12.5208	12.4971	12.4924	12.4162	9.82426	9.51008	10.1611	9.3773
sp|P33991|MCM4_HUMAN	P33991	NA	NA	NA	NA	NA	NA	NA	NA	11.4159	11.3857	10.9547	10.238	13.3896	13.3199	13.2242	13.1877
sp|P33992|MCM5_HUMAN	P33992	NA	10.9347	NA	NA	NA	NA	NA	NA	11.3378	11.8568	11.2	11.2461	13.8195	13.6572	13.5623	13.3322
sp|P33993|MCM7_HUMAN	P33993	NA	NA	NA	NA	9.43829	9.83719	9.66642	NA	10.6653	10.5658	10.5052	10.3971	13.4148	13.3154	13.3013	13.2799
sp|P34059|GALNS_HUMAN	P34059	NA	NA	NA	NA	11.1012	11.0459	NA	NA	11.9194	NA	11.7738	NA	12.4888	12.3239	12.2999	NA
sp|P34741|SDC2_HUMAN	P34741	12.9043	NA	12.6616	12.5485	NA	12.3553	NA	11.979	NA	NA	11.1999	NA	NA	NA	NA	NA
sp|P34896|GLYC_HUMAN	P34896	NA	NA	NA	10.7008	NA	NA	NA	NA	NA	NA	10.9495	NA	12.7586	12.5995	12.5162	12.5769
sp|P34897|GLYM_HUMAN	P34897	10.5176	10.5092	10.7208	10.1209	12.5002	12.5717	12.6102	12.4333	13.5	13.5792	13.5452	13.2603	13.7461	13.6561	13.5295	13.5498
sp|P34932|HSP74_HUMAN	P34932	NA	11.6363	11.6204	NA	13.6033	13.5562	13.6682	13.6025	13.3625	13.2968	13.3638	13.2976	13.9116	13.9002	13.777	13.5839
sp|P34949|MPI_HUMAN	P34949	NA	NA	NA	NA	11.1711	10.9117	NA	11.3234	10.4061	10.9026	11.003	10.3699	11.8902	12.2951	12.231	11.9875
sp|P35052|GPC1_HUMAN	P35052	11.0289	10.8673	11.1127	11.0658	13.3641	13.3575	13.447	13.406	13.2282	13.3148	13.062	13.5308	10.3654	NA	9.82946	NA
sp|P35080|PROF2_HUMAN	P35080	10.5166	10.5999	10.6232	10.4571	14.2498	13.1554	13.2727	13.3844	12.6527	13.2283	12.5072	13.4212	14.0161	14.1178	14.0956	13.6179
sp|P35221|CTNA1_HUMAN	P35221	NA	NA	9.87673	9.3959	12.4618	12.296	12.3422	12.2473	12.7343	12.5428	12.5423	12.4586	12.5515	12.5427	12.4923	11.7836
sp|P35222|CTNB1_HUMAN	P35222	9.83407	NA	9.66198	NA	12.161	12.226	11.6399	11.9846	12.3164	12.3868	12.1581	11.9679	12.4794	12.2711	12.1204	11.9747
sp|P35232|PHB1_HUMAN	P35232	12.2864	12.1288	12.1904	12.2922	14.5662	14.6986	14.734	14.6136	14.71	14.6157	14.5222	14.7395	15.6803	15.4596	15.4483	15.3932
sp|P35237|SPB6_HUMAN	P35237	9.05496	9.64308	NA	8.34545	12.2006	11.6806	12.0943	12.2098	12.7554	12.8418	12.5709	12.3434	11.7549	10.8884	11.2338	11.0157
sp|P35241|RADI_HUMAN	P35241	NA	NA	NA	NA	12.2516	12.0099	11.4039	10.635	12.7079	12.6514	12.3098	12.1245	11.4158	10.6242	10.6113	10.3459
sp|P35244|RFA3_HUMAN	P35244	10.9201	11.8333	11.7309	11.8712	12.1546	11.4879	11.4517	11.7506	11.9828	13.0249	12.6849	12.7487	13.3109	13.4954	13.3877	13.3084
sp|P35249|RFC4_HUMAN	P35249	NA	NA	NA	NA	NA	NA	11.1824	NA	11.392	NA	NA	NA	12.4513	12.2326	12.082	11.9268
sp|P35250|RFC2_HUMAN	P35250	NA	NA	NA	NA	NA	NA	NA	NA	9.74249	NA	10.0386	NA	10.6647	10.934	10.7717	10.7089
sp|P35268|RL22_HUMAN	P35268	13.4362	13.2344	13.3205	13.1835	14.7083	14.6892	14.6839	14.8232	15.3253	15.5995	15.4786	15.4236	15.0593	15.1509	15.2237	15.117
sp|P35269|T2FA_HUMAN	P35269	NA	NA	NA	NA	10.3063	10.6809	10.4636	10.1405	12.1147	11.7771	11.6246	11.3381	12.9072	12.7985	12.192	12.7216
sp|P35270|SPRE_HUMAN	P35270	NA	NA	NA	NA	9.93677	9.58817	NA	NA	9.36429	9.47219	9.40388	10.5267	12.734	12.8615	12.56	12.3775
sp|P35442|TSP2_HUMAN	P35442	11.3035	11.4789	11.7809	11.4731	11.8962	11.7657	11.9729	11.6637	9.92645	9.18332	9.74205	10.8039	NA	NA	NA	9.97906
sp|P35475|IDUA_HUMAN	P35475	NA	NA	NA	NA	NA	NA	NA	NA	12.4434	12.3864	12.2463	NA	NA	NA	NA	NA
sp|P35555|FBN1_HUMAN	P35555	9.89142	10.1617	10.3157	10.2667	11.6671	11.4601	11.6774	11.537	14.6731	10.7224	11.0415	11.3701	11.0348	10.9306	10.784	10.6807
sp|P35556|FBN2_HUMAN	P35556	NA	NA	10.6828	NA	NA	NA	NA	NA	14.3347	11.8779	11.8324	10.9037	NA	NA	NA	NA
sp|P35573|GDE_HUMAN	P35573	NA	10.6264	NA	10.5331	11.4768	10.9608	10.9476	10.9536	11.5173	11.1709	11.3658	11.1717	13.0163	13.0756	13.0673	12.5978
sp|P35579|MYH9_HUMAN	P35579	14.5837	14.9505	14.817	14.3083	15.3394	15.333	15.4247	15.4387	15.4477	15.3135	15.2447	15.2946	15.3768	15.1261	15.1657	14.9936
sp|P35580|MYH10_HUMAN	P35580	10.8622	10.8499	10.9559	10.5557	12.1258	11.9548	12.0641	12.1761	13.8537	13.7286	13.5755	13.4014	9.46477	10.1728	9.48086	NA
sp|P35606|COPB2_HUMAN	P35606	11.0059	11.2956	10.623	10.868	13.2763	13.2702	13.3194	13.278	13.4903	13.6532	13.5323	13.6932	12.9849	13.1081	13.013	12.9514
sp|P35610|SOAT1_HUMAN	P35610	NA	NA	10.117	NA	NA	NA	10.4354	10.3682	10.3163	11.1229	11.2161	10.8469	12.1475	12.6767	12.5771	12.6937
sp|P35611|ADDA_HUMAN	P35611	9.36866	8.73067	8.58197	9.43772	12.303	12.4239	12.4497	12.4353	11.945	12.2814	12.37	12.3582	12.265	12.2727	12.153	12.1865
sp|P35613|BASI_HUMAN	P35613	11.09	11.7232	NA	11.4832	13.2652	13.4305	13.5118	13.3637	14.3863	14.026	14.0974	14.236	14.9077	14.4595	14.7524	14.5542
sp|P35625|TIMP3_HUMAN	P35625	10.9346	10.9501	11.3636	11.2564	14.027	13.6971	14.1777	13.8028	13.3906	13.1665	13.0411	13.0946	10.4	NA	NA	NA
sp|P35637|FUS_HUMAN	P35637	NA	NA	NA	NA	11.74	11.4318	11.4647	11.3086	12.095	12.7956	12.6788	12.2902	12.2246	11.8276	11.4408	12.2834
sp|P35658|NU214_HUMAN	P35658	NA	NA	NA	NA	11.2291	11.0615	11.1097	11.3316	11.7333	11.6054	11.9268	11.5444	12.2528	12.2045	12.0322	12.0365
sp|P35659|DEK_HUMAN	P35659	11.0875	10.8244	10.6339	10.8012	11.1615	11.4044	11.3758	11.1789	13.6264	13.5086	13.9614	13.5145	13.9932	14.1724	14.1731	14.0692
sp|P35754|GLRX1_HUMAN	P35754	NA	NA	NA	9.14424	12.5585	12.7252	12.74	12.7364	13.9698	13.0593	13.8489	14.3426	12.7594	12.6664	12.8502	12.7255
sp|P35914|HMGCL_HUMAN	P35914	NA	NA	NA	NA	12.2073	11.9103	12.067	11.5061	11.2029	11.0352	10.789	11.2827	11.4122	11.3016	12.035	11.8691
sp|P35998|PRS7_HUMAN	P35998	10.2095	10.1743	9.58644	9.4394	12.9841	12.9292	13.1437	12.7805	12.8463	12.6871	12.6176	12.7501	13.5504	13.4111	13.1732	13.1419
sp|P36021|MOT8_HUMAN	P36021	NA	NA	NA	NA	13.1854	13.4557	13.2717	NA	NA	NA	NA	NA	12.6307	NA	NA	NA
sp|P36222|CH3L1_HUMAN	P36222	NA	NA	NA	11.8754	NA	NA	NA	NA	NA	NA	NA	NA	13.722	13.7844	13.7962	13.535
sp|P36269|GGT5_HUMAN	P36269	10.3484	10.6078	10.6275	10.2461	13.4385	13.212	13.4505	13.3447	9.28093	9.14171	NA	NA	8.7746	NA	8.99863	NA
sp|P36404|ARL2_HUMAN	P36404	11.072	11.3081	11.5047	11.1945	12.7287	12.7957	12.764	12.7982	12.5372	12.7554	12.5703	12.3912	13.0326	13.3346	13.1344	13.247
sp|P36405|ARL3_HUMAN	P36405	NA	NA	NA	NA	12.6994	12.7813	12.7673	12.6269	12.5262	12.3708	12.7131	12.683	13.1503	13.1759	12.6738	12.1445
sp|P36507|MP2K2_HUMAN	P36507	NA	NA	NA	NA	NA	12.0433	NA	NA	12.2283	12.0661	11.7991	NA	13.2672	12.7442	12.7236	12.7675
sp|P36542|ATPG_HUMAN	P36542	11.6928	11.7958	11.6996	11.3998	12.6261	13.0046	12.6098	12.9538	12.9539	13.275	13.1908	12.9708	13.8062	13.6947	13.7132	13.6543
sp|P36543|VATE1_HUMAN	P36543	11.1029	NA	10.4662	9.65855	12.8879	12.8353	13.1863	13.13	13.1054	13.236	13.0669	13.0615	13.6265	13.6696	13.668	13.4523
sp|P36551|HEM6_HUMAN	P36551	NA	NA	NA	NA	10.6829	11.3378	11.0694	11.1748	11.6355	11.6901	11.8948	11.6938	12.7019	13.0023	12.7423	12.7882
sp|P36578|RL4_HUMAN	P36578	12.5231	13.4074	12.7544	12.7517	14.7861	14.7994	14.9703	14.919	14.9545	14.978	14.8475	14.8356	14.8613	14.6211	14.5144	14.3525
sp|P36639|8ODP_HUMAN	P36639	NA	NA	NA	NA	NA	11.0405	11.1106	11.401	11.4455	11.5122	NA	11.2098	11.6008	11.862	11.74	11.8014
sp|P36776|LONM_HUMAN	P36776	NA	5.49086	7.27573	NA	11.5295	11.3491	11.3059	11.4079	12.7292	12.6788	12.5923	12.673	13.7261	13.5645	13.5678	13.3397
sp|P36871|PGM1_HUMAN	P36871	NA	NA	9.89713	NA	11.5215	11.2968	11.4163	11.4549	12.8426	12.3375	12.6208	12.414	13.1116	13.0536	13.0279	12.9354
sp|P36873|PP1G_HUMAN	P36873	NA	NA	NA	NA	12.1493	12.0648	11.8756	11.9064	12.3901	12.4122	12.6668	NA	NA	12.73	12.5944	12.5975
sp|P36915|GNL1_HUMAN	P36915	NA	9.36613	NA	NA	10.3235	9.40015	11.0874	10.556	11.9682	11.8188	11.2924	10.8055	10.3667	11.5323	10.7311	10.4869
sp|P36955|PEDF_HUMAN	P36955	NA	NA	NA	NA	NA	NA	NA	NA	NA	11.287	11.6955	11.4946	NA	NA	NA	NA
sp|P36957|ODO2_HUMAN	P36957	12.2018	12.2974	12.2152	11.9548	13.891	13.9788	13.9913	13.9452	14.1245	14.1503	14.1591	14.3286	14.4181	14.2212	13.9314	14.1303
sp|P36969|GPX4_HUMAN	P36969	NA	NA	11.6407	NA	13.9204	13.7674	13.8752	13.6777	13.6546	13.7344	13.6985	13.8622	12.7717	12.5026	12.5091	12.4722
sp|P37108|SRP14_HUMAN	P37108	12.1912	12.7411	12.1534	12.1327	12.1632	12.2319	12.5498	12.1845	13.7074	12.9795	13.4165	12.966	14.7558	14.4205	14.1377	14.1063
sp|P37198|NUP62_HUMAN	P37198	NA	NA	NA	NA	11.9167	NA	12.0631	11.418	12.4048	12.1793	12.1116	11.884	13.4362	13.1124	12.296	12.7133
sp|P37235|HPCL1_HUMAN	P37235	NA	NA	NA	NA	10.6086	10.717	10.5473	11.0905	11.8023	12.1087	12.1712	11.5633	14.5458	14.7967	14.672	14.5294
sp|P37268|FDFT_HUMAN	P37268	NA	11.9004	NA	NA	10.9024	10.632	NA	11.2064	NA	NA	NA	NA	NA	NA	NA	NA
sp|P37802|TAGL2_HUMAN	P37802	11.8386	11.2468	11.1751	10.946	13.5056	13.3116	13.4263	13.4709	15.1877	15.1069	15.0023	14.9566	14.9078	14.6637	14.5589	14.497
sp|P37837|TALDO_HUMAN	P37837	11.3203	11.3735	11.6244	11.2915	13.0516	12.9801	13.0056	13.3485	14.0481	14.2222	14.3222	13.9355	14.2771	14.3769	14.3893	14.2471
sp|P38117|ETFB_HUMAN	P38117	10.1717	10.6802	10.4903	11.2959	13.7421	13.646	13.7101	13.6155	13.2517	13.2281	13.2076	13.5924	13.5045	13.4119	13.505	13.5059
sp|P38159|RBMX_HUMAN	P38159	11.6727	11.7223	11.4483	12.8707	11.0721	11.2273	11.3574	11.8782	13.5	13.1628	13.3981	13.2449	14.0188	13.4884	13.7025	13.6279
sp|P38435|VKGC_HUMAN	P38435	NA	NA	NA	NA	NA	12.956	NA	12.1724	NA	NA	NA	NA	NA	11.3883	NA	NA
sp|P38571|LICH_HUMAN	P38571	10.9329	10.6953	NA	NA	12.6995	12.7529	12.8179	12.6641	12.6874	12.936	12.8588	13.0165	NA	NA	10.3795	10.3664
sp|P38606|VATA_HUMAN	P38606	8.86882	9.55885	8.32002	9.53851	12.6598	12.5154	12.7601	12.8059	13.1295	13.0214	12.8355	12.802	13.5022	13.3925	13.3552	13.1289
sp|P38646|GRP75_HUMAN	P38646	9.3372	9.82328	9.53572	8.88028	12.8107	13.0203	12.9954	12.6417	13.2277	13.2062	13.4349	13.0735	14.58	14.6284	14.4828	14.5625
sp|P38919|IF4A3_HUMAN	P38919	10.4758	9.46251	9.72548	10.2301	11.221	11.0641	11.4351	10.9714	12.5281	12.5983	12.5545	12.2847	12.8263	12.6468	12.6202	12.6281
sp|P39019|RS19_HUMAN	P39019	16.5522	16.2349	16.0592	16.151	15.0416	15.1528	15.068	15.1644	15.4949	15.361	15.2322	15.4542	15.4004	15.3468	15.3063	15.2171
sp|P39023|RL3_HUMAN	P39023	11.5284	11.3786	11.5497	11.4985	13.1345	13.0436	13.4231	13.3023	13.6533	13.6126	13.4885	13.4969	13.8402	13.6797	13.6645	13.2949
sp|P39059|COFA1_HUMAN	P39059	16.0167	15.6081	15.5702	15.9535	NA	NA	NA	NA	14.6745	14.7089	14.4908	14.9298	NA	NA	NA	NA
sp|P39060|COIA1_HUMAN	P39060	17.769	17.6866	17.6575	17.6071	14.0712	14.2461	14.5571	14.1094	13.7356	13.6886	13.5852	13.9774	NA	NA	NA	NA
sp|P39656|OST48_HUMAN	P39656	11.8783	12.0247	12.169	12.0641	13.352	13.3329	13.4959	13.3668	13.1459	13.5263	13.5543	13.4712	13.4671	13.4748	13.42	13.5012
sp|P39687|AN32A_HUMAN	P39687	NA	NA	NA	NA	NA	13.8944	NA	13.9738	15.2339	NA	14.8244	NA	15.1094	15.0414	14.885	14.9839
sp|P39748|FEN1_HUMAN	P39748	10.68	10.9154	NA	NA	10.3359	9.76805	9.94182	9.86849	11.8942	11.5312	11.3996	11.1667	13.7852	13.6017	13.4885	13.3245
sp|P39880|CUX1_HUMAN	P39880	NA	NA	NA	NA	9.49284	9.38764	9.78979	9.38712	NA	9.04846	9.92842	10.0286	NA	NA	9.43882	9.94243
sp|P40121|CAPG_HUMAN	P40121	NA	NA	NA	NA	12.6895	12.8478	12.6787	12.8433	12.9057	12.8396	12.7829	12.9849	14.8626	14.6268	14.456	14.4593
sp|P40123|CAP2_HUMAN	P40123	NA	NA	NA	NA	11.5971	11.2583	11.2363	NA	12.956	13.0822	12.1446	12.4226	11.7624	11.4834	11.5515	11.2945
sp|P40222|TXLNA_HUMAN	P40222	11.1521	NA	NA	NA	11.7099	11.5446	11.4675	11.5435	12.7049	12.8421	12.3184	12.8904	12.5667	12.2736	12.3858	12.1975
sp|P40227|TCPZ_HUMAN	P40227	12.3411	12.686	12.0891	12.2932	13.2989	13.2532	13.215	13.2498	13.8045	13.5383	13.4847	13.5679	14.5646	14.2266	14.2382	14.1419
sp|P40261|NNMT_HUMAN	P40261	NA	NA	9.47036	NA	12.9957	12.8887	13.0635	13.0107	14.3616	14.2629	14.1404	14.2692	11.2038	11.7229	11.5656	11.2713
sp|P40306|PSB10_HUMAN	P40306	NA	NA	NA	NA	14.4577	14.1566	13.7828	13.6968	12.9352	12.8531	12.9454	12.7103	12.6667	12.05	12.1185	12.1556
sp|P40429|RL13A_HUMAN	P40429	12.8363	13.2444	13.2126	13.228	14.1203	13.9478	14.1384	14.2429	13.9235	14.567	14.6714	14.0052	14.9397	14.81	14.7008	14.5171
sp|P40616|ARL1_HUMAN	P40616	10.5302	10.5952	10.0762	10.3275	12.3589	12.4342	12.4595	12.4843	11.4177	12.202	12.009	11.246	12.662	12.8314	12.7853	13.0466
sp|P40763|STAT3_HUMAN	P40763	NA	NA	NA	NA	11.2509	11.2463	10.2769	11.4636	11.727	11.252	11.83	11.3321	11.0362	10.5837	10.7805	10.204
sp|P40818|UBP8_HUMAN	P40818	NA	NA	NA	NA	NA	NA	NA	NA	NA	NA	NA	NA	NA	11.2401	12.0975	10.8977
sp|P40925|MDHC_HUMAN	P40925	NA	NA	NA	NA	13.9766	14.0509	13.9997	13.9723	14.1527	13.9488	14.0124	13.9717	15.3904	15.3905	15.2767	15.2516
sp|P40926|MDHM_HUMAN	P40926	8.90857	NA	9.17669	9.33095	14.2539	14.141	14.2034	14.0625	14.9033	14.7999	14.8241	14.9731	14.7505	14.5876	14.4323	14.3415
sp|P40937|RFC5_HUMAN	P40937	NA	NA	NA	NA	NA	NA	NA	NA	NA	NA	10.8421	11.3497	12.2618	12.1235	12.157	11.791
sp|P40938|RFC3_HUMAN	P40938	NA	NA	NA	NA	NA	NA	NA	NA	9.67367	9.57845	NA	9.28687	11.2979	11.014	11.008	10.6319
sp|P40939|ECHA_HUMAN	P40939	13.5086	13.894	13.5772	13.3676	14.0758	14.0418	14.091	14.066	14.1252	14.0191	14.0081	14.0476	14.4187	14.345	14.3148	14.1846
sp|P41091|IF2G_HUMAN	P41091	10.3036	10.7114	NA	10.1768	12.0979	12.3104	12.1401	12.1891	12.7104	12.4904	12.4853	12.3228	13.6055	13.1827	13.1892	12.9177
sp|P41208|CETN2_HUMAN	P41208	NA	NA	NA	NA	NA	10.631	10.9949	NA	NA	10.6214	NA	10.9863	12.7612	12.5241	12.2709	12.3039
sp|P41214|EIF2D_HUMAN	P41214	NA	9.33062	NA	NA	9.84178	10.1071	9.92203	9.25904	10.2997	9.50532	10.2214	10.2253	11.7218	11.1886	11.4355	10.8491
sp|P41221|WNT5A_HUMAN	P41221	14.2214	14.162	14.2106	14.1481	12.1673	11.5694	12.7465	12.5808	NA	NA	10.6595	NA	12.5779	12.8242	12.5107	12.6555
sp|P41240|CSK_HUMAN	P41240	NA	10.3588	11.0994	NA	11.9202	11.4549	NA	11.5159	12.6365	12.4434	12.0472	12.6605	12.8524	12.9806	11.1845	12.1852
sp|P41250|GARS_HUMAN	P41250	8.32506	8.43781	8.04169	8.67651	13.2333	13.2191	13.2541	13.2968	13.3262	13.2957	13.2928	13.1444	12.7309	12.589	12.4959	12.4439
sp|P41252|SYIC_HUMAN	P41252	11.8278	11.9269	11.9084	11.8462	13.146	13.1731	13.2178	13.2113	13.453	13.2882	13.2759	13.1907	13.6841	13.381	13.4414	13.3068
sp|P41567|EIF1_HUMAN	P41567	NA	NA	NA	NA	11.0377	10.6392	10.4321	10.8975	11.7535	12.2068	11.8363	11.4615	11.7041	12.1585	12.1735	11.6528
sp|P42025|ACTY_HUMAN	P42025	10.2495	NA	NA	NA	12.4879	12.418	13.8927	12.4266	10.1255	14.1218	14.069	13.9697	13.5773	13.7123	13.6964	13.5241
sp|P42126|ECI1_HUMAN	P42126	NA	NA	NA	NA	NA	NA	NA	NA	13.0333	12.8677	12.8703	11.6965	12.2724	12.0952	12.2634	11.5238
sp|P42166|LAP2A_HUMAN	P42166	10.995	11.661	11.3762	10.8076	11.2619	10.6825	NA	10.9715	12.9063	12.8454	13.3378	12.595	12.8425	12.8011	13.182	12.8835
sp|P42224|STAT1_HUMAN	P42224	10.8943	10.535	10.6972	10.5863	12.9283	12.9676	12.7291	13.105	11.9241	12.0717	12.113	12.1542	13.1607	12.9139	13.0261	12.9035
sp|P42226|STAT6_HUMAN	P42226	NA	NA	10.1798	NA	NA	10.366	NA	NA	11.4806	11.0393	10.9142	10.946	10.9636	10.9697	10.8732	9.59066
sp|P42285|MTREX_HUMAN	P42285	NA	11.0985	NA	NA	10.685	10.8643	NA	10.9221	11.7841	12.043	11.5563	11.5559	12.8298	12.6593	12.4292	12.5421
sp|P42345|MTOR_HUMAN	P42345	NA	NA	NA	NA	10.1541	9.95358	9.94771	9.91206	8.73115	8.63806	10.1826	8.70863	10.5845	10.451	10.621	10.584
sp|P42356|PI4KA_HUMAN	P42356	NA	NA	NA	NA	11.443	NA	11.0427	10.6921	12.0717	11.9795	12.1077	10.964	12.3329	12.4122	12.5012	12.1936
sp|P42566|EPS15_HUMAN	P42566	NA	NA	NA	NA	11.6853	11.9757	12.2624	12.0711	11.8495	12.4652	12.4365	11.6809	11.8581	12.0079	12.3589	11.9191
sp|P42574|CASP3_HUMAN	P42574	NA	NA	NA	NA	13.9828	13.911	13.8858	13.935	13.0361	12.7936	12.8666	12.2254	NA	NA	NA	NA
sp|P42696|RBM34_HUMAN	P42696	NA	NA	NA	NA	NA	NA	NA	NA	NA	NA	NA	10.941	10.499	10.5138	NA	NA
sp|P42704|LPPRC_HUMAN	P42704	9.81717	9.61642	9.56041	10.1823	12.163	12.0947	12.0157	11.9845	12.5654	12.5084	12.4371	12.1275	13.4492	13.3602	13.2592	13.2436
sp|P42765|THIM_HUMAN	P42765	NA	NA	NA	NA	12.1916	11.843	12.1731	11.8503	13.4278	13.1212	13.4017	13.3633	12.674	12.5359	12.3854	12.1963
sp|P42766|RL35_HUMAN	P42766	14.716	14.7856	14.598	14.4071	15.0749	15.1661	14.9208	15.0797	15.0071	14.7678	14.6718	14.4452	14.7875	14.4811	14.4537	14.6407
sp|P42771|CDN2A_HUMAN	P42771	NA	NA	NA	NA	13.3514	13.3026	13.1803	13.2554	10.8768	11.1913	10.9709	11.4529	NA	NA	NA	NA
sp|P42785|PCP_HUMAN	P42785	9.75578	10.1868	9.82005	10.279	12.191	12.5548	12.611	12.5776	13.1188	13.1599	13.0625	12.9005	11.9151	11.799	12.3027	12.2253
sp|P42858|HD_HUMAN	P42858	NA	NA	NA	NA	11.6246	NA	11.2211	11.3015	10.5838	11.0744	10.4958	NA	11.6017	11.4902	NA	11.9267
sp|P42892|ECE1_HUMAN	P42892	NA	NA	NA	NA	11.4045	10.1196	11.245	11.1305	11.0017	10.4919	11.0878	10.067	11.7423	10.617	10.936	11.0966
sp|P43003|EAA1_HUMAN	P43003	NA	NA	NA	NA	14.7797	14.8032	14.8322	14.8011	NA	NA	NA	NA	12.715	13.2035	13.1613	12.9558
sp|P43007|SATT_HUMAN	P43007	NA	NA	NA	NA	NA	10.3258	NA	NA	NA	NA	10.4835	NA	11.7307	11.7856	11.3746	NA
sp|P43034|LIS1_HUMAN	P43034	NA	NA	NA	NA	12.6286	12.5762	12.7663	12.5051	13.0442	12.8965	12.7413	12.4604	13.0144	12.7966	12.8862	12.8937
sp|P43155|CACP_HUMAN	P43155	NA	NA	NA	NA	10.5893	10.4113	10.8295	NA	11.264	NA	NA	NA	10.9834	11.076	11.8898	11.2137
sp|P43235|CATK_HUMAN	P43235	9.95275	NA	10.959	NA	10.1599	NA	10.2996	9.98416	NA	NA	NA	NA	13.1903	12.9834	12.7553	12.8133
sp|P43243|MATR3_HUMAN	P43243	10.5906	10.8568	10.9159	10.9175	12.1049	11.9938	12.0085	11.9223	13.2391	13.1978	13.0385	12.9643	13.8748	13.5712	13.6752	13.5503
sp|P43246|MSH2_HUMAN	P43246	NA	NA	NA	NA	NA	NA	NA	NA	NA	10.8573	NA	10.2432	11.6521	11.7846	11.5709	11.7316
sp|P43304|GPDM_HUMAN	P43304	10.7234	11.0098	10.6671	10.579	13.0441	12.8465	12.9989	13.0048	12.5749	12.7726	12.5051	12.4573	13.5205	13.4016	13.2397	13.2721
sp|P43307|SSRA_HUMAN	P43307	12.4569	12.1753	12.5731	12.4361	14.5423	14.481	14.4828	14.6244	14.6852	14.6034	14.5369	14.5329	13.8678	13.5154	13.7425	13.518
sp|P43353|AL3B1_HUMAN	P43353	NA	NA	NA	NA	NA	NA	NA	NA	10.8039	11.2922	11.2479	11.2272	12.1548	12.5003	12.9958	12.708
sp|P43487|RANG_HUMAN	P43487	NA	NA	NA	NA	11.9714	12.0296	11.8459	12.1616	13.4846	13.1397	12.9638	12.875	13.7929	13.6918	13.5254	13.3602
sp|P43490|NAMPT_HUMAN	P43490	9.61671	8.72103	9.59928	9.5581	11.5136	11.286	11.6255	11.3448	12.1366	12.0823	11.7872	11.9685	14.0547	13.9812	13.9126	13.8328
sp|P43686|PRS6B_HUMAN	P43686	7.923	7.99738	8.21143	9.60257	12.5434	11.8432	12.7045	12.5207	12.3676	11.8414	11.2182	12.3386	12.7605	12.3414	12.4104	13.0368
sp|P43897|EFTS_HUMAN	P43897	NA	NA	NA	NA	10.7569	10.7756	10.3598	11.0669	11.24	10.6491	11.2442	10.8358	12.278	12.1921	12.2754	11.9159
sp|P45880|VDAC2_HUMAN	P45880	14.1451	14.416	14.4793	14.2679	15.1467	15.1108	15.3043	15.2154	14.8844	14.976	14.8908	15.1793	15.5289	15.3347	15.3459	15.3511
sp|P45954|ACDSB_HUMAN	P45954	NA	NA	NA	10.9122	10.2514	NA	NA	9.90279	NA	10.3585	9.5848	NA	12.0578	11.9025	11.9285	11.9604
sp|P45973|CBX5_HUMAN	P45973	NA	10.4139	NA	9.89752	9.80655	10.1893	9.99064	NA	12.5889	12.4003	12.2404	12.03	12.2949	12.5548	12.5809	12.3502
sp|P45974|UBP5_HUMAN	P45974	8.03811	9.02548	9.23917	9.06127	13.0498	13.0101	13.0325	12.8289	12.7064	12.6548	12.6344	12.2844	13.0324	13.01	12.91	12.8436
sp|P46013|KI67_HUMAN	P46013	11.7956	12.0441	12.0907	12.0761	NA	9.95046	NA	NA	NA	NA	NA	NA	12.372	12.1834	12.034	12.03
sp|P46060|RAGP1_HUMAN	P46060	10.272	NA	10.1248	10.7014	12.1118	12.293	11.7687	11.8451	12.6505	12.7454	12.827	12.8748	13.0748	12.6695	12.53	12.5792
sp|P46063|RECQ1_HUMAN	P46063	10.6223	10.9713	10.9	10.7224	12.2663	12.6567	12.4827	12.2714	12.9978	13.1839	12.8823	12.9417	13.4509	13.5412	13.4018	13.404
sp|P46087|NOP2_HUMAN	P46087	11.0029	10.724	10.547	10.4576	11.3782	11.3855	11.4059	11.1376	12.6671	12.2622	12.276	12.4834	13.4689	13.0768	13.337	13.155
sp|P46100|ATRX_HUMAN	P46100	NA	NA	NA	NA	NA	10.0535	NA	9.87066	NA	NA	NA	NA	NA	NA	9.78271	NA
sp|P46108|CRK_HUMAN	P46108	NA	11.2948	NA	NA	10.8617	11.6281	10.7858	11.0111	12.1366	11.7267	11.9731	11.9626	11.0617	11.9679	11.7608	11.5478
sp|P46109|CRKL_HUMAN	P46109	NA	NA	NA	NA	NA	11.0354	11.0653	NA	12.2345	12.3651	11.869	12.3116	12.6202	12.5384	12.1874	12.1883
sp|P46379|BAG6_HUMAN	P46379	NA	NA	NA	NA	11.8908	11.4919	11.6535	11.0939	12.1182	12.0069	11.7531	11.8827	12.564	12.4778	12.3479	12.3295
sp|P46459|NSF_HUMAN	P46459	10.1861	10.5416	10.3977	10.4709	12.7851	13.0175	12.9615	12.8215	12.6091	12.8564	12.6232	12.7371	13.6087	13.4992	13.4722	13.2817
sp|P46734|MP2K3_HUMAN	P46734	NA	NA	NA	NA	11.0494	9.80843	10.1353	10.3529	NA	NA	NA	NA	10.2793	9.76868	9.78208	10.6053
sp|P46776|RL27A_HUMAN	P46776	14.2004	14.653	14.2974	14.0288	15.1688	15.3863	15.3663	15.3309	15.5624	15.453	15.5796	15.5044	15.4869	15.0942	15.0641	14.9286
sp|P46777|RL5_HUMAN	P46777	13.1552	13.6596	13.3263	13.222	14.5407	14.5992	14.5897	14.5743	14.7309	14.852	14.7709	14.8468	14.7101	14.5085	14.3414	14.3836
sp|P46778|RL21_HUMAN	P46778	11.4844	11.1884	10.5799	10.6293	12.8092	13.2254	12.8007	13.0835	13.7938	13.5516	13.5751	13.487	13.4681	13.3895	12.8889	12.9681
sp|P46779|RL28_HUMAN	P46779	13.9349	14.4828	14.4044	14.2255	15.4599	15.4607	15.3962	15.4874	15.3743	15.1954	15.175	15.4682	14.5905	15.0901	14.9159	14.9521
sp|P46781|RS9_HUMAN	P46781	13.8933	13.9475	13.7645	13.6683	14.7603	14.8571	14.9075	14.9059	14.8677	14.5891	14.5851	15.0655	14.8207	14.5913	14.6258	14.5272
sp|P46782|RS5_HUMAN	P46782	13.7983	13.1813	13.0098	13.2566	14.1117	14.0464	14.2036	14.2206	14.6995	14.569	14.5181	14.3804	14.8936	14.3971	14.714	14.6047
sp|P46783|RS10_HUMAN	P46783	16.9533	16.4344	16.1225	16.8077	17.3239	17.1898	16.7523	17.2773	17.2434	17.913	17.4241	16.8132	17.4613	17.8526	17.63	17.7865
sp|P46821|MAP1B_HUMAN	P46821	9.73674	9.66927	9.70003	8.97375	12.7952	12.7566	12.903	12.6704	13.0558	12.9117	12.8775	12.7975	14.7935	14.5184	14.5532	14.3463
sp|P46926|GNPI1_HUMAN	P46926	NA	NA	NA	NA	11.1698	11.0024	11.2593	11.3613	12.7049	12.3565	12.429	12.2303	13.7592	13.6495	13.5732	13.7388
sp|P46934|NEDD4_HUMAN	P46934	NA	NA	NA	NA	10.9444	10.8576	10.9589	11.1105	12.338	12.0225	12.3719	11.3046	11.2772	11.3066	11.1612	11.2104
sp|P46937|YAP1_HUMAN	P46937	NA	NA	NA	NA	11.9992	12.2798	12.284	11.9963	11.871	12.3076	11.8531	12.017	NA	NA	NA	NA
sp|P46939|UTRN_HUMAN	P46939	9.77275	9.83835	9.71488	9.87976	11.25	11.1363	11.5885	11.0772	11.8841	11.5062	11.4712	11.6799	11.881	11.7485	11.5998	11.4869
sp|P46940|IQGA1_HUMAN	P46940	11.1154	11.0432	11.0916	11.0293	13.7444	13.6974	13.8134	13.7055	13.4074	13.4017	13.2837	13.3043	14.1963	14.0265	13.9633	13.7198
sp|P46976|GLYG_HUMAN	P46976	NA	NA	NA	NA	11.9655	12.291	12.3563	12.5828	14.2648	13.4726	13.708	13.7214	11.9232	11.8339	12.0441	12.0932
sp|P46977|STT3A_HUMAN	P46977	10.3766	10.4286	11.0328	10.9461	13.0651	13.0027	13.3462	12.9681	11.6017	12.819	12.9027	12.176	12.2675	12.4805	12.3945	12.3169
sp|P47755|CAZA2_HUMAN	P47755	NA	11.4074	11.8737	12.0386	12.005	12.1851	11.67	12.101	12.9195	13.4253	12.6736	13.3827	12.6177	13.0717	12.8787	12.82
sp|P47756|CAPZB_HUMAN	P47756	11.5888	11.8468	11.3519	10.6647	13.3876	13.1655	13.3205	13.3017	13.5944	13.474	13.5949	13.5834	13.4318	13.547	13.5929	13.4511
sp|P47895|AL1A3_HUMAN	P47895	10.3709	NA	NA	11.0217	NA	NA	NA	NA	9.01011	NA	NA	NA	13.5186	13.5011	13.5326	13.4387
sp|P47897|SYQ_HUMAN	P47897	11.0752	10.9871	11.1757	11.2341	13.2244	12.9702	13.1589	12.958	13.1462	12.769	12.9691	12.7502	13.8614	13.6705	13.513	13.4506
sp|P47914|RL29_HUMAN	P47914	13.2447	13.7732	13.6761	13.5052	15.1706	15.4938	15.4046	15.5475	14.98	15.4669	15.8285	15.7175	14.8386	14.537	15.2077	15.2436
sp|P48047|ATPO_HUMAN	P48047	14.3565	14.2215	14.3857	13.9242	13.8639	13.9618	14.0545	13.9187	14.5195	14.4265	14.4771	14.7002	14.7532	14.4936	14.6836	14.5415
sp|P48059|LIMS1_HUMAN	P48059	NA	NA	NA	NA	12.4573	11.9306	12.5253	12.3444	12.2216	12.1399	11.8689	11.5111	12.7281	12.5148	12.4717	11.9968
sp|P48060|GLIP1_HUMAN	P48060	NA	NA	NA	NA	11.5721	11.8309	11.1942	11.8457	NA	NA	NA	NA	11.9267	12.0672	12.2798	11.9009
sp|P48061|SDF1_HUMAN	P48061	12.1559	10.7254	11.6666	11.8428	NA	NA	NA	NA	NA	NA	NA	NA	NA	NA	NA	NA
sp|P48147|PPCE_HUMAN	P48147	NA	NA	NA	NA	11.9151	11.2861	11.692	11.4894	10.7872	11.0814	10.9383	11.1236	10.7204	10.4994	10.0129	10.9786
sp|P48163|MAOX_HUMAN	P48163	NA	NA	NA	NA	12.8533	12.439	12.0193	12.5296	12.8368	12.6923	12.6491	12.8031	NA	NA	NA	NA
sp|P48307|TFPI2_HUMAN	P48307	15.1063	15.4052	14.8814	14.9579	NA	NA	NA	NA	9.61162	9.2769	9.9858	11.4018	12.5411	12.2872	12.4295	12.6687
sp|P48426|PI42A_HUMAN	P48426	NA	NA	NA	NA	NA	NA	NA	NA	NA	NA	NA	NA	13.65	13.5549	13.5581	13.4453
sp|P48444|COPD_HUMAN	P48444	10.0569	9.90941	10.2938	10.1562	12.9492	13.086	13.0929	13.0462	13.5536	13.2408	13.365	13.3944	13.0231	12.9895	12.8839	12.7549
sp|P48449|LSS_HUMAN	P48449	NA	NA	NA	NA	12.6369	12.5854	12.4223	12.848	12.176	11.707	12.1163	11.6485	11.6799	11.9719	11.5354	11.1328
sp|P48507|GSH0_HUMAN	P48507	NA	NA	NA	NA	11.9042	12.0328	12.1819	11.8662	11.0182	10.8341	11.2825	11.1058	11.5921	11.5401	11.2575	11.5963
sp|P48509|CD151_HUMAN	P48509	8.19302	8.3783	7.94925	7.50171	12.7587	12.9345	12.5106	12.6872	8.87947	8.94507	8.8525	9.14107	9.93008	10.8535	9.84695	9.86811
sp|P48556|PSMD8_HUMAN	P48556	NA	NA	NA	NA	12.7958	12.9175	12.7655	12.703	13.0086	12.9812	12.8391	13.1289	13.4485	13.5147	13.2525	13.3212
sp|P48634|PRC2A_HUMAN	P48634	NA	NA	NA	NA	11.3031	11.3541	11.0769	11.3404	11.3286	11.9023	11.9101	11.6452	10.857	10.2231	11.9513	11.4593
sp|P48637|GSHB_HUMAN	P48637	NA	NA	NA	NA	11.586	11.4963	11.7408	11.5881	11.0758	11.7406	11.3356	11.7428	12.8446	12.8509	12.6122	12.6629
sp|P48643|TCPE_HUMAN	P48643	12.2206	11.6292	11.6829	11.6865	12.9093	12.6126	13.1861	12.7965	12.8168	13.0281	12.916	12.933	13.7719	13.7414	13.8855	13.797
sp|P48651|PTSS1_HUMAN	P48651	11.2514	10.9262	10.8934	11.5236	11.7948	11.4423	11.6279	11.6936	NA	12.5394	12.5265	12.1746	12.7414	12.9659	13.0255	12.8118
sp|P48681|NEST_HUMAN	P48681	10.8808	10.868	10.7794	10.6846	13.5654	13.5704	13.6393	13.6396	13.2569	13.155	13.2089	13.6323	12.0441	11.6796	11.6861	11.2856
sp|P48735|IDHP_HUMAN	P48735	12.4592	12.4363	12.1757	12.1527	12.1509	12.5042	12.3544	12.4028	13.9274	14.1277	14.0159	13.6404	13.1849	13.147	13.2628	13.0942
sp|P48739|PIPNB_HUMAN	P48739	NA	NA	NA	NA	11.7	11.8444	11.894	11.8308	12.6153	12.7636	12.5891	11.7272	12.0302	11.7633	12.1012	12.0329
sp|P48960|AGRE5_HUMAN	P48960	NA	NA	NA	NA	NA	NA	10.3047	NA	10.8376	NA	NA	9.98438	12.9801	12.8243	12.6454	12.8391
sp|P49006|MRP_HUMAN	P49006	NA	NA	NA	NA	12.5022	12.2602	12.428	11.6239	11.5483	10.8617	10.9599	12.6617	NA	NA	NA	NA
sp|P49023|PAXI_HUMAN	P49023	10.1786	9.98205	10.1612	10.0684	11.5329	11.2881	11.5034	11.3272	11.3147	11.3534	11.4192	11.735	12.9721	12.3946	12.573	12.1755
sp|P49069|CAMLG_HUMAN	P49069	NA	NA	NA	NA	9.82984	9.29836	NA	NA	NA	NA	NA	NA	9.71925	9.45912	9.48605	10.1723
sp|P49184|DNSL1_HUMAN	P49184	13.2148	12.8748	12.8957	12.9446	NA	NA	NA	NA	11.1627	11.2859	11.0698	NA	NA	NA	NA	NA
sp|P49189|AL9A1_HUMAN	P49189	10.8569	10.2976	11.383	10.7214	14.3365	14.385	14.3573	14.2809	13.734	13.538	13.7373	13.7582	13.3439	13.0643	13.2595	12.8174
sp|P49207|RL34_HUMAN	P49207	13.711	13.8603	13.3849	13.3713	14.6675	14.8276	14.821	14.6797	14.8652	14.6899	15.1373	14.9811	14.82	14.1514	14.1037	14.3595
sp|P49257|LMAN1_HUMAN	P49257	10.6578	NA	NA	NA	13.3662	13.3702	13.5092	13.4548	13.7487	13.7301	13.727	13.763	12.5845	12.5866	12.6812	12.4017
sp|P49321|NASP_HUMAN	P49321	10.4897	NA	10.5109	NA	9.34736	10.0248	9.81107	NA	12.1804	11.9817	11.1635	11.7491	12.8153	12.6488	12.8374	12.6159
sp|P49327|FAS_HUMAN	P49327	10.9597	10.8312	11.0943	10.8337	13.9038	13.7874	13.9388	13.9554	13.0898	13.2029	12.8973	13.1121	12.4414	12.3326	12.1714	12.1433
sp|P49354|FNTA_HUMAN	P49354	NA	NA	NA	NA	11.2642	10.8826	11.1961	10.4501	11.1944	11.2176	11.1926	10.8696	11.3044	11.0404	11.3821	10.156
sp|P49356|FNTB_HUMAN	P49356	NA	NA	NA	NA	10.6038	11.293	11.1799	NA	NA	11.9218	11.331	11.165	11.7374	12.0884	11.4641	11.9857
sp|P49368|TCPG_HUMAN	P49368	14.0146	13.9394	13.6975	13.7432	14.2585	14.3547	14.3317	14.3274	14.6209	14.5049	14.4538	14.6397	15.3061	15.1874	15.1576	14.9667
sp|P49406|RM19_HUMAN	P49406	NA	NA	NA	NA	11.9425	11.9586	NA	11.9018	NA	11.8968	12.1399	12.2627	12.7836	12.498	12.4388	12.2769
sp|P49411|EFTU_HUMAN	P49411	10.5702	10.5277	10.6449	10.0952	12.9342	12.8048	12.8549	12.9953	13.4634	13.3935	13.4828	13.5531	14.464	14.2814	14.3255	14.3217
sp|P49418|AMPH_HUMAN	P49418	NA	NA	NA	NA	NA	NA	NA	NA	NA	NA	NA	NA	NA	12.721	12.6224	12.5626
sp|P49419|AL7A1_HUMAN	P49419	10.5031	10.5032	10.559	9.62322	12.6698	12.6272	12.84	12.5876	12.7836	13.0846	12.9489	12.8124	11.2249	11.5576	11.6851	11.4667
sp|P49458|SRP09_HUMAN	P49458	13.2209	13.5539	13.3976	13.1221	13.1671	13.1619	13.0301	13.0158	13.9669	13.9721	14.0467	14.371	14.9559	14.938	15.2258	15.0496
sp|P49585|PCY1A_HUMAN	P49585	NA	NA	NA	NA	10.0195	9.96421	9.82619	NA	9.88594	NA	NA	9.87839	11.2987	11.4571	11.3916	11.2396
sp|P49588|SYAC_HUMAN	P49588	NA	9.89484	11.069	10.7792	12.9956	12.6717	13.0576	13.004	13.5478	13.4785	13.5063	13.1922	13.4814	13.3511	13.2733	13.1014
sp|P49589|SYCC_HUMAN	P49589	10.5264	10.2481	9.88181	10.2531	11.7132	12.2324	12.2427	12.5299	13.0571	13.112	13.1878	13.0182	12.7739	12.5517	12.3945	12.3316
sp|P49591|SYSC_HUMAN	P49591	10.5287	10.9567	10.4649	10.2538	12.6311	12.7049	12.6222	12.7223	13.4901	13.4535	13.3113	12.6584	13.6469	13.3966	13.3324	13.2936
sp|P49593|PPM1F_HUMAN	P49593	8.46187	8.10514	7.68101	7.85596	10.6331	10.606	11.2132	10.7182	8.74202	8.52177	9.81272	8.54115	10.387	9.38035	8.84712	10.3258
sp|P49711|CTCF_HUMAN	P49711	NA	NA	9.3481	NA	NA	NA	NA	NA	9.80424	9.02684	9.07955	9.97758	10.6518	10.3221	9.19831	9.72975
sp|P49720|PSB3_HUMAN	P49720	NA	NA	NA	NA	14.0237	14.0561	14.0921	13.8459	13.7579	13.6915	13.734	13.5092	13.9267	13.9018	13.9151	13.8716
sp|P49721|PSB2_HUMAN	P49721	NA	NA	NA	NA	13.4215	12.9669	13.4048	13.3056	13.098	13.2156	13.2911	13.1555	13.5741	13.1977	13.4031	13.3489
sp|P49736|MCM2_HUMAN	P49736	8.70341	9.49879	9.24329	NA	9.03928	NA	NA	NA	11.1169	11.1646	11.2852	11.1147	13.6054	13.5304	13.5501	13.3165
sp|P49748|ACADV_HUMAN	P49748	10.0719	9.9056	9.52636	NA	12.2192	12.0621	12.0359	12.0374	11.9769	11.8914	11.9742	12.4119	13.7059	13.5802	13.521	13.3506
sp|P49750|YLPM1_HUMAN	P49750	NA	NA	NA	NA	NA	NA	NA	NA	NA	NA	11.947	NA	NA	11.0112	11.1555	11.0962
sp|P49754|VPS41_HUMAN	P49754	NA	NA	NA	NA	11.467	11.2628	11.0772	11.762	10.2597	11.026	NA	NA	11.0783	10.994	11.2102	10.9061
sp|P49755|TMEDA_HUMAN	P49755	11.4965	11.1292	11.3981	11.4756	12.9575	12.3487	12.9152	12.9172	12.9392	12.9666	13.1104	12.8494	13.2145	13.0005	13.0703	12.9646
sp|P49756|RBM25_HUMAN	P49756	NA	NA	NA	NA	10.9837	11.4092	10.3152	10.9639	11.3411	12.1357	11.7687	11.1354	12.344	12.2187	12.5046	12.3364
sp|P49757|NUMB_HUMAN	P49757	10.0643	NA	NA	NA	11.9061	12.0527	11.9302	12.1932	12.3726	11.4214	11.443	12.5679	14.0559	13.6705	13.6358	13.7646
sp|P49773|HINT1_HUMAN	P49773	10.7589	10.4576	9.78604	NA	12.8481	13.1671	12.6477	13.2176	12.0313	11.9205	11.7343	NA	13.0232	13.7141	13.7941	13.7088
sp|P49790|NU153_HUMAN	P49790	NA	NA	NA	NA	10.8983	NA	NA	NA	11.0114	11.9605	12.0187	NA	11.6183	11.8164	11.5591	11.5042
sp|P49792|RBP2_HUMAN	P49792	NA	NA	NA	NA	11.1164	11.0308	11.2013	11.1374	12.2113	12.107	12.0547	12.0543	12.4152	12.2661	11.9956	11.9475
sp|P49821|NDUV1_HUMAN	P49821	10.1966	10.7934	10.0874	9.9537	12.2774	12.1731	12.3236	11.9856	12.8225	12.9385	12.7718	12.6722	12.4852	12.5457	12.6488	12.2735
sp|P49902|5NTC_HUMAN	P49902	9.77806	NA	9.87235	9.84239	10.5204	11.0747	11.8012	11.3723	11.904	12.4654	12.1568	12.6107	12.023	12.0158	11.4952	11.5399
sp|P49903|SPS1_HUMAN	P49903	NA	NA	NA	NA	NA	NA	NA	10.0746	12.0404	11.5864	11.7348	11.8183	11.963	NA	11.586	11.9153
sp|P49915|GUAA_HUMAN	P49915	9.49193	NA	9.75363	NA	11.6228	11.2613	11.333	11.8359	12.2575	12.0041	12.5503	12.1491	13.5176	13.4238	13.3027	13.1708
sp|P49916|DNLI3_HUMAN	P49916	NA	NA	NA	NA	NA	NA	NA	NA	NA	NA	NA	11.2198	12.0675	12.0308	12.1675	11.7514
sp|P49959|MRE11_HUMAN	P49959	10.8903	NA	NA	NA	NA	NA	NA	NA	12.1695	12.2528	12.2224	12.2726	11.8507	12.2126	12.5224	11.9622
sp|P50148|GNAQ_HUMAN	P50148	NA	11.2801	NA	NA	12.8618	12.2284	12.4971	12.9342	11.4643	11.8188	11.7566	11.3452	10.5605	11.3601	11.1181	11.3636
sp|P50213|IDH3A_HUMAN	P50213	NA	10.6545	9.96612	9.97477	11.3996	11.797	11.9117	11.4431	12.1317	12.0288	11.7739	11.7402	13.2917	13.0317	12.9268	13.1027
sp|P50281|MMP14_HUMAN	P50281	NA	NA	NA	NA	12.2141	12.1011	12.1955	12.4057	13.2523	13.3557	13.2386	13.6079	13.2793	13.5064	13.4985	13.3016
sp|P50395|GDIB_HUMAN	P50395	9.35286	NA	8.88033	8.78848	13.7008	13.4668	13.7356	13.6917	13.8122	13.7692	13.6855	13.6772	13.8114	13.7583	13.7871	13.6514
sp|P50402|EMD_HUMAN	P50402	11.9225	12.0663	12.1438	11.8721	12.336	12.3453	12.2987	12.5075	12.911	13.045	13.1789	13.0475	13.223	13.0738	13.0487	13.0934
sp|P50416|CPT1A_HUMAN	P50416	10.7389	10.2028	10.4278	10.4625	11.8047	11.8177	11.8777	12.01	11.0615	11.3427	11.1382	11.1143	13.3922	13.4686	13.3672	13.2965
sp|P50452|SPB8_HUMAN	P50452	NA	NA	NA	NA	11.6187	11.871	NA	11.8222	NA	NA	NA	NA	11.6812	11.9144	12.0263	11.9836
sp|P50453|SPB9_HUMAN	P50453	NA	NA	NA	NA	NA	NA	NA	NA	12.4748	12.7733	12.7742	12.5542	NA	NA	NA	NA
sp|P50454|SERPH_HUMAN	P50454	15.7431	15.0114	15.0344	15.3808	13.7093	13.7218	13.9269	13.8231	16.1908	16.2728	16.1116	16.1389	12.0212	11.994	11.8571	11.5455
sp|P50479|PDLI4_HUMAN	P50479	NA	NA	NA	NA	12.6932	12.5406	12.3184	12.5601	12.8314	12.49	12.6776	12.4643	NA	NA	NA	NA
sp|P50552|VASP_HUMAN	P50552	10.4348	10.4831	10.4073	10.5498	13.1419	13.2362	13.3581	13.2894	12.5641	12.5768	12.6544	12.6071	12.5805	12.4677	12.4216	12.4233
sp|P50570|DYN2_HUMAN	P50570	10.1335	10.2295	10.1964	10.0601	12.0626	11.6811	11.8796	11.8861	11.9748	11.8263	11.6743	11.3835	12.4569	12.5109	12.3573	12.2358
sp|P50579|MAP2_HUMAN	P50579	NA	10.3927	NA	10.0043	12.0445	12.0499	12.1819	12.1523	13.1134	12.837	12.4354	NA	11.5537	11.8919	11.4164	11.2985
sp|P50583|AP4A_HUMAN	P50583	NA	8.59449	NA	10.437	11.6409	11.6723	10.4164	11.5975	9.99462	11.0915	11.1358	9.86387	11.1135	10.2601	10.0363	10.2456
sp|P50895|BCAM_HUMAN	P50895	13.1294	13.4903	13.3967	12.9683	NA	NA	NA	NA	11.6443	NA	NA	11.1595	NA	NA	NA	NA
sp|P50897|PPT1_HUMAN	P50897	8.74396	NA	NA	NA	11.2234	10.5228	NA	10.9856	11.9746	12.1588	11.6941	11.594	10.6034	10.2994	10.0195	11.5755
sp|P50914|RL14_HUMAN	P50914	14.7555	15.1261	14.5703	14.8836	16.2831	16.2617	16.337	16.2704	16.0958	16.1489	16.3216	16.2797	16.1861	16.1704	15.9704	16.0194
sp|P50990|TCPQ_HUMAN	P50990	13.2621	13.4717	13.1554	13.2827	13.5762	13.6759	13.718	13.5512	14.0401	13.9994	13.9521	14.1449	14.745	14.5306	14.5443	14.3565
sp|P50991|TCPD_HUMAN	P50991	12.7075	13.0156	13.0889	12.9075	13.5252	13.6086	13.6746	13.5064	13.9583	13.8416	13.8627	14.0438	14.6771	14.4967	14.5222	14.3511
sp|P50995|ANX11_HUMAN	P50995	10.7466	10.393	10.1531	11.1781	13.5673	13.601	13.5299	13.7031	13.9009	14.1257	13.9966	13.8434	13.4622	13.5362	13.6462	13.4269
sp|P51114|FXR1_HUMAN	P51114	10.2216	10.9857	10.2813	10.0524	NA	11.7728	10.4436	10.8476	11.8233	10.2057	12.1564	11.5574	12.0471	11.9905	12.9715	11.5574
sp|P51116|FXR2_HUMAN	P51116	NA	NA	NA	NA	11.5498	NA	11.8222	11.751	11.702	NA	11.3866	11.6443	12.2445	12.0188	11.7713	11.4612
sp|P51148|RAB5C_HUMAN	P51148	11.748	11.0677	10.986	11.23	12.4481	13.2579	13.6624	13.6835	13.401	13.2895	13.2923	12.5112	13.3537	13.4216	13.3632	13.151
sp|P51149|RAB7A_HUMAN	P51149	11.6907	11.4172	11.7942	11.5135	14.8698	14.8915	14.9434	14.9075	14.7094	14.6687	14.6954	14.6219	15.2431	15.1896	15.1183	15.0031
sp|P51151|RAB9A_HUMAN	P51151	12.7973	11.976	9.76014	11.5559	13.3368	NA	NA	NA	12.6876	NA	NA	NA	13.4038	13.0235	13.4323	13.2253
sp|P51153|RAB13_HUMAN	P51153	12.474	12.2872	12.0285	12.6138	13.9895	14.0729	14.1706	14.1548	14.1577	14.2606	13.911	13.8149	14.6113	14.661	14.5139	14.2729
sp|P51159|RB27A_HUMAN	P51159	NA	NA	NA	NA	NA	12.0213	12.2663	11.7721	12.3769	12.3383	12.2303	12.4718	12.627	12.4393	12.5643	12.5082
sp|P51398|RT29_HUMAN	P51398	9.50019	11.228	11.3829	9.40175	10.1072	10.0654	11.1502	10.0341	12.7247	12.3307	12.2823	12.6771	12.8082	12.7286	11.7851	12.6887
sp|P51452|DUS3_HUMAN	P51452	NA	NA	NA	NA	NA	NA	NA	11.3445	12.0426	NA	12.3299	12.155	12.1167	NA	11.5483	11.3323
sp|P51532|SMCA4_HUMAN	P51532	NA	NA	NA	NA	NA	NA	NA	NA	12.2959	11.8965	12.0867	12.1964	12.4849	12.2366	12.1649	12.1625
sp|P51553|IDH3G_HUMAN	P51553	NA	NA	NA	NA	NA	NA	NA	NA	NA	11.5779	11.8131	NA	13.0195	13.0628	12.9479	12.543
sp|P51570|GALK1_HUMAN	P51570	10.757	NA	10.8243	NA	11.6674	11.3395	11.6996	11.8274	12.1899	11.8914	11.9848	11.0553	13.1412	13.3193	13.2667	12.8126
sp|P51571|SSRD_HUMAN	P51571	12.1493	10.8798	10.4722	10.7447	13.8084	13.8202	13.7576	13.9844	13.8874	13.864	13.8414	14.0203	11.1079	12.9636	12.8091	12.9032
sp|P51572|BAP31_HUMAN	P51572	12.7538	12.3369	12.2326	12.3467	12.674	12.7309	12.8581	12.9771	12.1016	11.7525	11.7191	12.1714	13.1172	13.1194	12.955	13.2817
sp|P51608|MECP2_HUMAN	P51608	13.7812	13.438	13.3694	13.611	10.8462	11.5033	11.0454	10.998	11.9761	12.04	11.8791	11.938	12.4744	12.3751	12.3174	12.4536
sp|P51610|HCFC1_HUMAN	P51610	NA	NA	NA	NA	9.87112	10.0681	NA	10.2611	12.1685	11.6713	11.8893	11.5332	12.2743	12.2528	12.2824	12.1772
sp|P51636|CAV2_HUMAN	P51636	13.2659	14.0943	13.2858	13.4588	11.9194	12.0764	12.2005	12.0586	NA	9.36873	NA	10.4691	NA	9.63967	NA	9.67384
sp|P51648|AL3A2_HUMAN	P51648	10.6756	10.512	11.0644	10.8086	11.9214	12.0616	12.3373	11.9806	11.2928	10.869	10.2529	10.5644	12.7869	12.3698	12.2888	12.2088
sp|P51659|DHB4_HUMAN	P51659	10.9973	10.9367	10.9297	10.5988	13.5731	13.6219	13.7458	13.6188	13.5277	13.3039	13.4953	13.4277	11.4432	11.0258	10.98	11.1193
sp|P51665|PSMD7_HUMAN	P51665	10.1937	10.2209	10.7318	9.94262	10.8776	11.1836	11.2524	10.8661	12.0789	12.2388	11.8559	11.5168	12.624	12.436	12.1455	11.9242
sp|P51798|CLCN7_HUMAN	P51798	NA	NA	NA	NA	12.6273	12.7087	12.6507	13.0846	12.8545	12.8143	12.849	12.4253	12.6227	12.5276	12.5649	12.2334
sp|P51808|DYLT3_HUMAN	P51808	NA	NA	NA	NA	11.985	11.7547	12.1282	NA	11.2149	10.9033	10.6469	11.2481	12.386	12.152	NA	NA
sp|P51809|VAMP7_HUMAN	P51809	NA	NA	NA	NA	12.3995	11.6256	11.8604	12.2402	11.8986	11.8582	11.8791	12.1011	12.5671	11.3923	12.54	11.9942
sp|P51812|KS6A3_HUMAN	P51812	NA	NA	NA	NA	10.1369	10.1745	10.3178	NA	11.5026	11.5971	11.5314	11.4901	12.8071	12.803	12.6115	12.5866
sp|P51858|HDGF_HUMAN	P51858	NA	NA	NA	NA	12.2025	12.3126	12.2174	11.764	11.732	13.1477	12.6213	12.6006	13.7907	13.8235	13.6639	13.3685
sp|P51911|CNN1_HUMAN	P51911	NA	NA	NA	NA	NA	NA	NA	NA	12.8331	12.5357	12.6623	13.1783	NA	NA	NA	NA
sp|P51970|NDUA8_HUMAN	P51970	NA	10.5048	9.56489	NA	13.0281	11.2822	13.1153	12.4533	13.2751	11.7026	12.4021	11.6541	11.3895	11.5119	11.2924	11.611
sp|P51991|ROA3_HUMAN	P51991	9.54737	9.51113	9.79561	9.03398	11.5331	11.4529	11.5552	11.4806	12.6887	12.9712	12.8485	12.4732	12.7038	13.0026	13.0851	12.994
sp|P52209|6PGD_HUMAN	P52209	10.5641	9.23161	9.25425	9.73645	13.6977	13.4723	13.4825	13.5513	13.0664	12.7564	12.549	12.7871	12.8426	12.6711	12.7028	12.5603
sp|P52272|HNRPM_HUMAN	P52272	12.9266	12.9173	13.1728	12.7277	13.3812	13.6807	13.5907	13.5888	14.6938	14.6897	14.5741	14.5528	14.9731	14.8628	14.8965	14.8182
sp|P52294|IMA5_HUMAN	P52294	NA	NA	NA	9.92112	11.9325	11.599	11.853	11.5206	11.6636	11.2547	10.7818	11.3284	12.5574	12.6506	12.5096	12.6208
sp|P52306|GDS1_HUMAN	P52306	NA	NA	NA	NA	12.3514	12.4123	12.1988	12.417	12.8501	12.5962	12.3397	12.4342	10.8845	11.0176	10.4686	10.8634
sp|P52434|RPAB3_HUMAN	P52434	9.93515	10.4956	10.8578	9.91781	11.333	10.7758	9.74133	10.4438	11.0057	11.1061	10.5093	11.4658	12.4257	10.8344	11.8376	11.7212
sp|P52565|GDIR1_HUMAN	P52565	11.6622	11.7234	11.9321	11.7253	14.6107	14.7655	14.6056	14.6188	14.6584	14.6003	14.3522	14.6648	14.5161	14.4897	14.4374	14.3681
sp|P52594|AGFG1_HUMAN	P52594	NA	NA	NA	NA	11.9461	11.7881	NA	12.1592	11.383	12.0736	11.8672	11.8099	11.6451	12.3702	12.1225	12.0807
sp|P52597|HNRPF_HUMAN	P52597	9.06528	8.78039	NA	9.2599	11.5123	11.9591	11.863	11.6843	12.9171	12.6186	12.6326	12.49	13.5491	13.4911	13.3612	13.2707
sp|P52630|STAT2_HUMAN	P52630	NA	10.8597	NA	10.8445	12.2551	12.388	11.9788	12.0959	12.9769	12.8157	12.6402	12.8642	12.2084	12.0835	11.5344	11.8283
sp|P52701|MSH6_HUMAN	P52701	NA	NA	NA	NA	NA	NA	NA	9.06282	NA	10.5601	10.5916	8.94258	12.0951	12.2774	12.0396	12.0331
sp|P52788|SPSY_HUMAN	P52788	NA	11.1711	10.3035	10.2156	11.6958	12.1106	12.2975	12.0726	12.7773	12.7672	12.7623	12.1918	14.2124	14.0338	14.1052	13.9275
sp|P52789|HXK2_HUMAN	P52789	10.0001	NA	NA	10.0501	NA	9.40691	9.59859	NA	NA	NA	NA	9.64592	14.4465	14.3095	14.3156	14.1804
sp|P52815|RM12_HUMAN	P52815	10.3771	10.2018	9.81493	10.3574	12.7718	13.0281	12.5442	12.4683	13.815	13.7416	13.5189	13.4391	13.9706	13.9144	13.7694	13.7401
sp|P52907|CAZA1_HUMAN	P52907	12.1065	12.4316	11.4897	11.5905	13.3904	13.1944	13.1028	13.207	13.3747	13.2273	13.1216	13.1456	13.5755	13.4629	13.5812	13.3862
sp|P52926|HMGA2_HUMAN	P52926	11.154	10.0412	11.5842	11.6343	11.2099	11.2792	11.4583	11.3517	12.1134	12.2702	12.1541	12.7804	13.3516	13.446	13.3879	13.4185
sp|P52943|CRIP2_HUMAN	P52943	NA	NA	NA	NA	13.1261	NA	12.7585	12.8616	12.8649	12.521	12.9232	NA	NA	NA	NA	NA
sp|P52948|NUP98_HUMAN	P52948	NA	NA	NA	NA	12.0809	11.4552	11.3527	11.8727	11.2232	12.3682	11.4433	11.1554	12.3318	11.9653	11.1842	NA
sp|P53004|BIEA_HUMAN	P53004	10.1443	10.0974	10.0961	NA	12.7676	12.8752	12.0801	12.8765	12.7413	13.2224	13.0734	12.6248	13.6708	13.7683	13.5225	13.5829
sp|P53007|TXTP_HUMAN	P53007	11.733	11.9403	12.4318	12.4576	13.6777	13.6543	13.669	13.6468	12.7628	13.4223	13.5053	13.5045	13.2568	13.4309	13.5418	13.6794
sp|P53041|PPP5_HUMAN	P53041	NA	NA	9.45494	NA	11.9154	12.119	12.0791	12.0314	12.7945	12.8119	12.9055	12.898	12.5244	12.3048	12.3085	12.0978
sp|P53367|ARFP1_HUMAN	P53367	NA	NA	NA	9.80744	12.6417	12.7214	NA	NA	12.3317	NA	12.5196	12.6029	11.9847	NA	NA	NA
sp|P53396|ACLY_HUMAN	P53396	11.865	11.7205	11.6316	11.6358	14.3285	14.347	14.3215	14.4273	13.5975	13.5792	13.4983	13.7253	14.5753	14.5258	14.4494	14.4087
sp|P53582|MAP11_HUMAN	P53582	NA	NA	NA	NA	11.5156	NA	11.3495	NA	11.0658	11.6774	10.7901	11.1665	11.0237	NA	11.2388	11.1782
sp|P53597|SUCA_HUMAN	P53597	NA	10.9642	NA	10.486	12.4965	12.2886	12.4639	12.4379	13.1522	12.6751	12.9384	13.0321	13.8996	13.888	13.642	13.5555
sp|P53618|COPB_HUMAN	P53618	9.77542	10.1367	9.60677	9.52407	13.25	13.0593	13.1842	13.171	12.7326	13.0647	13.0525	12.5091	12.7461	12.5513	12.5101	12.2765
sp|P53621|COPA_HUMAN	P53621	11.6689	11.6226	11.5442	11.1938	13.6763	13.6698	13.6655	13.6681	13.8458	13.7945	13.6984	13.7214	13.2835	13.2582	13.2949	13.144
sp|P53634|CATC_HUMAN	P53634	10.5752	10.7971	11.1601	10.7706	10.8075	10.9586	10.8974	10.8203	12.1753	12.252	12.4409	12.3938	10.2082	9.93886	10.0563	10.0404
sp|P53680|AP2S1_HUMAN	P53680	11.0226	11.3317	10.9114	10.696	13.0805	13.0271	12.6224	12.7873	12.7518	12.9561	12.8765	12.4392	13.0453	12.955	12.815	12.6093
sp|P53794|SC5A3_HUMAN	P53794	NA	NA	NA	NA	NA	NA	NA	NA	NA	NA	NA	NA	12.9319	12.7967	12.8481	12.6394
sp|P53985|MOT1_HUMAN	P53985	NA	NA	NA	NA	9.70637	10.1604	9.92478	9.80128	9.14127	10.0812	9.48544	10.2614	11.9782	12.4836	12.4825	12.6737
sp|P53990|IST1_HUMAN	P53990	10.0153	9.24249	9.74168	NA	11.5107	12.2158	11.9045	12.1447	12.4953	11.8265	12.1572	12.3556	12.1804	12.3964	12.0702	12.0183
sp|P53992|SC24C_HUMAN	P53992	NA	10.9217	NA	NA	11.8859	12.0548	12.3217	12.0741	12.0807	12.2696	12.0533	11.8421	12.6534	12.5148	12.4592	12.2988
sp|P53999|TCP4_HUMAN	P53999	11.0495	NA	10.8727	10.6705	13.887	14.0019	13.7686	13.9532	15.1897	15.2285	15.1645	15.1851	14.0925	14.3861	14.181	14.0427
sp|P54136|SYRC_HUMAN	P54136	12.1079	12.1925	11.9304	11.8168	13.337	13.4218	13.4831	13.4364	13.5404	13.5212	13.3936	13.4867	14.0086	13.8589	13.8569	13.7543
sp|P54289|CA2D1_HUMAN	P54289	13.0999	12.9692	12.9623	12.7954	11.1331	11.7038	11.6765	11.4429	11.8064	11.3362	11.2374	11.5528	11.3161	10.9773	10.2238	10.4942
sp|P54577|SYYC_HUMAN	P54577	11.3567	10.8267	10.6749	10.6901	13.0861	13.1407	12.9549	12.9954	13.5275	13.8272	13.711	13.2809	13.3756	13.2588	13.191	13.1128
sp|P54578|UBP14_HUMAN	P54578	9.22436	8.73984	9.36239	9.22546	12.1858	12.798	12.4342	12.3575	12.2923	12.3015	12.2297	12.19	13.1485	13.0714	12.9866	12.8887
sp|P54619|AAKG1_HUMAN	P54619	NA	10.3614	10.1388	10.1178	12.0768	11.3934	11.3682	11.3075	11.5699	11.7475	11.2907	11.0615	10.1183	10.6395	10.7585	11.3712
sp|P54652|HSP72_HUMAN	P54652	10.1298	9.99108	9.73859	9.55717	NA	NA	NA	NA	10.1631	9.96667	9.91324	9.90758	11.2563	10.046	10.9994	11.255
sp|P54687|BCAT1_HUMAN	P54687	NA	NA	NA	NA	NA	NA	NA	NA	11.3996	11.1664	10.8941	NA	11.3452	11.6458	NA	NA
sp|P54709|AT1B3_HUMAN	P54709	NA	NA	NA	10.3827	13.0146	13.1837	13.0038	12.9476	11.1875	12.6599	12.3184	12.0418	13.5362	13.8325	13.8389	13.6266
sp|P54725|RD23A_HUMAN	P54725	NA	9.66881	NA	NA	9.82048	10.5517	9.7785	11.0467	11.4552	11.6573	10.7308	11.7983	12.2793	12.164	11.997	12.2244
sp|P54727|RD23B_HUMAN	P54727	NA	NA	NA	NA	12.2743	12.404	11.8319	12.292	13.3348	13.3752	13.2175	13.0443	13.6632	13.3903	13.1121	12.6102
sp|P54802|ANAG_HUMAN	P54802	NA	NA	10.253	NA	10.7635	10.6418	10.5363	10.119	12.0365	12.2528	11.0853	11.4409	10.8773	8.91343	11.4635	11.4629
sp|P54819|KAD2_HUMAN	P54819	NA	NA	NA	NA	12.4671	12.4976	12.4314	12.445	12.4714	12.9357	12.92	12.8052	13.3651	13.073	13.0749	13.315
sp|P54886|P5CS_HUMAN	P54886	NA	10.0274	10.0385	NA	13.7389	13.7853	13.7486	13.7004	13.2845	13.2161	13.2457	13.599	12.4582	12.1262	11.9308	12.198
sp|P54920|SNAA_HUMAN	P54920	NA	12.3123	NA	NA	12.5765	12.9316	12.6981	12.7562	12.8074	12.5991	12.5457	12.9679	13.5076	13.4144	13.3202	13.4532
sp|P55010|IF5_HUMAN	P55010	NA	NA	NA	NA	11.8906	11.8615	11.9938	12.005	13.0019	12.8957	12.8752	12.215	13.3784	13.3157	13.1903	12.9873
sp|P55036|PSMD4_HUMAN	P55036	10.6581	NA	10.6866	10.6773	13.1874	13.3281	13.4079	13.0591	14.0457	13.8787	13.731	13.7792	14.1043	13.9248	13.9131	13.7781
sp|P55039|DRG2_HUMAN	P55039	NA	NA	NA	9.19442	11.0262	11.0951	11.0215	11.0944	11.1446	11.2421	11.3926	10.6427	11.5129	11.664	10.3717	10.2729
sp|P55058|PLTP_HUMAN	P55058	NA	NA	NA	NA	NA	9.46718	NA	NA	11.5004	NA	NA	11.2516	12.3767	12.3156	NA	NA
sp|P55060|XPO2_HUMAN	P55060	NA	9.71916	8.35418	9.12668	11.8889	11.7193	11.7208	11.6429	11.8916	12.1696	11.9242	11.8605	13.5746	13.4957	13.4274	13.4393
sp|P55072|TERA_HUMAN	P55072	9.48024	9.31615	9.82256	9.45012	13.8693	13.7574	13.8349	13.799	14.1361	14.1334	14.0608	14.1414	14.2494	14.1937	14.1412	14.0128
sp|P55084|ECHB_HUMAN	P55084	14.3989	14.8185	14.4354	14.3092	14.1993	14.2737	14.332	14.2179	14.1033	14.056	14.0275	14.2178	14.4703	14.4214	14.3561	14.2972
sp|P55145|MANF_HUMAN	P55145	NA	NA	NA	NA	13.2531	NA	13.3678	13.3956	NA	NA	NA	14.2205	NA	NA	NA	NA
sp|P55209|NP1L1_HUMAN	P55209	10.1431	10.1933	10.268	9.89348	13.1844	13.1456	13.0522	13.1179	13.9495	13.8985	13.6099	13.7921	13.7886	13.6603	13.4194	13.5684
sp|P55212|CASP6_HUMAN	P55212	NA	NA	NA	NA	12.3022	12.1108	12.0192	12.1727	11.4209	11.2314	11.8758	11.642	11.7942	11.6103	11.2977	11.7139
sp|P55263|ADK_HUMAN	P55263	NA	NA	9.84076	NA	11.9213	11.7544	11.6504	11.331	9.08021	9.87533	10.3433	10.1234	11.5227	10.9951	11.0882	10.6289
sp|P55265|DSRAD_HUMAN	P55265	NA	NA	NA	9.1224	9.35456	10.6858	10.0994	11.0389	11.3945	11.3146	11.1415	10.8083	11.2513	11.4011	12.0203	11.5368
sp|P55268|LAMB2_HUMAN	P55268	15.4937	15.4839	15.3599	15.3309	12.2223	12.4848	12.879	12.5033	8.75357	9.61437	9.32249	9.82499	8.1249	8.1514	7.76588	7.60528
sp|P55287|CAD11_HUMAN	P55287	NA	NA	10.3943	NA	12.6398	12.9808	12.97	12.695	13.0335	13.0084	12.9508	12.9513	NA	NA	NA	NA
sp|P55290|CAD13_HUMAN	P55290	12.6341	12.5827	12.6448	12.5879	12.806	12.7783	12.9771	12.9853	11.5993	11.2687	11.0429	11.539	13.6213	13.5666	13.5207	13.5162
sp|P55327|TPD52_HUMAN	P55327	NA	NA	NA	NA	NA	NA	NA	NA	NA	NA	NA	NA	13.1035	13.0709	12.9944	13.0043
sp|P55735|SEC13_HUMAN	P55735	9.98035	10.035	9.665	9.84039	12.4035	12.4531	12.517	12.4947	11.8188	12.2238	12.1013	11.3052	12.3963	12.195	11.7817	11.887
sp|P55769|NH2L1_HUMAN	P55769	13.3082	13.4424	13.3228	13.0907	13.3387	13.3371	13.1908	13.2209	14.8287	15.0383	14.9822	14.792	14.967	14.7178	14.9096	14.6213
sp|P55786|PSA_HUMAN	P55786	10.3975	10.0634	10.1164	10.1036	12.7666	12.7535	12.6636	12.8461	13.3083	13.2647	13.2848	13.3573	13.5963	13.5868	13.4799	13.3658
sp|P55795|HNRH2_HUMAN	P55795	10.9754	11.9736	11.2018	11.026	12.0891	12.3433	12.499	12.1958	13.2148	12.8619	13.0905	13.1424	13.6622	13.5254	13.4048	12.7006
sp|P55809|SCOT1_HUMAN	P55809	NA	NA	NA	NA	12.4143	12.1786	12.1494	12.3529	11.6449	11.3321	11.4963	11.3005	12.9489	12.7249	12.8942	12.8619
sp|P55884|EIF3B_HUMAN	P55884	10.4633	10.646	10.122	10.5023	12.7991	12.9028	13.054	12.9777	12.7875	13.029	13.062	12.8573	13.228	13.29	13.3408	13.1081
sp|P55957|BID_HUMAN	P55957	NA	NA	NA	NA	10.4667	10.1764	10.2217	10.2729	9.49577	10.1272	NA	8.36648	11.4919	11.6895	10.6269	11.5314
sp|P56134|ATPK_HUMAN	P56134	13.2169	13.4484	13.0106	13.286	14.5832	14.7735	14.7692	14.604	14.9252	14.8803	14.729	14.6684	15.1281	15.0445	14.9174	14.8748
sp|P56182|RRP1_HUMAN	P56182	NA	NA	NA	NA	NA	NA	NA	NA	12.4539	12.4819	12.3753	12.2889	12.928	12.6971	12.7282	12.8822
sp|P56192|SYMC_HUMAN	P56192	11.0612	11.6072	10.7587	11.092	11.5331	12.3576	11.7671	12.657	12.9451	13.0107	12.6481	12.5378	12.5079	12.5378	12.1596	11.7505
sp|P56199|ITA1_HUMAN	P56199	NA	NA	NA	NA	11.7752	12.7172	11.428	11.3044	11.9471	11.6934	11.8274	11.7794	NA	NA	NA	NA
sp|P56378|ATP68_HUMAN	P56378	12.3673	12.371	11.9713	11.3691	13.0332	13.899	13.6862	13.1481	12.6735	13.8167	13.8817	14.2484	12.7395	12.5085	13.8276	12.5357
sp|P56385|ATP5I_HUMAN	P56385	13.869	13.5901	13.6074	NA	14.8044	14.8485	14.8652	14.6733	14.8965	14.9183	14.8746	14.9667	15.1151	14.8751	14.944	14.5029
sp|P56537|IF6_HUMAN	P56537	NA	10.3491	10.274	NA	12.1817	12.1507	12.2077	12.0052	12.1001	12.2362	12.0793	11.9835	12.9808	12.8254	12.9234	12.7713
sp|P56545|CTBP2_HUMAN	P56545	NA	NA	NA	NA	11.7206	NA	NA	NA	12.3573	11.9564	12.2315	12.2227	12.1992	NA	NA	11.8127
sp|P56556|NDUA6_HUMAN	P56556	11.6355	12.4605	12.2837	12.4188	11.9854	11.8373	12.071	11.2942	12.5534	12.2775	12.1028	11.3121	11.5142	11.1666	11.7042	11.6505
sp|P57088|TMM33_HUMAN	P57088	11.1218	12.0396	11.6983	11.5814	11.7079	11.1979	11.9909	12.7763	12.1927	13.2424	13.148	13.1636	14.0491	14.0835	14.039	13.9673
sp|P57678|GEMI4_HUMAN	P57678	NA	NA	NA	NA	NA	NA	NA	NA	NA	10.442	9.93939	10.802	10.7608	11.0147	10.6944	10.2319
sp|P57737|CORO7_HUMAN	P57737	NA	NA	NA	NA	10.849	11.0999	NA	11.2117	10.7328	NA	11.0695	NA	10.591	10.398	NA	10.3423
sp|P57740|NU107_HUMAN	P57740	NA	NA	NA	10.0504	10.5347	11.0953	11.3071	11.7197	12.8349	12.2399	12.5361	11.9432	12.9475	12.7397	12.3615	12.2628
sp|P57764|GSDMD_HUMAN	P57764	NA	NA	NA	NA	10.5822	NA	NA	NA	NA	NA	NA	NA	10.8745	11.4508	10.9332	11.2505
sp|P58335|ANTR2_HUMAN	P58335	NA	NA	NA	NA	11.5194	11.3342	11.194	11.1804	12.9604	13.1695	12.547	12.4924	NA	9.91436	9.60526	NA
sp|P58546|MTPN_HUMAN	P58546	NA	NA	NA	NA	12.4959	12.5137	12.4674	12.4993	NA	NA	NA	12.8582	14.013	13.8513	13.6063	13.7055
sp|P58557|YBEY_HUMAN	P58557	NA	NA	NA	NA	NA	NA	NA	NA	NA	NA	NA	NA	NA	12.5377	13.0652	13.0845
sp|P59768|GBG2_HUMAN	P59768	NA	NA	NA	NA	NA	NA	NA	NA	14.0505	13.9517	13.8132	13.7571	12.7508	12.403	NA	10.6769
sp|P59998|ARPC4_HUMAN	P59998	13.87	14.1036	13.762	13.4202	13.9106	14.0226	14.1349	13.7072	13.7188	13.6486	13.6991	13.8465	14.0683	13.7286	13.6406	13.7354
sp|P60033|CD81_HUMAN	P60033	10.4188	10.4886	NA	10.3613	14.0272	14.133	14.0908	14.0898	14.3228	14.2985	14.0668	14.1661	12.1597	11.9538	11.7242	11.9139
sp|P60059|SC61G_HUMAN	P60059	10.1541	10.2071	11.413	9.79725	13.8466	14.242	13.9563	14.2557	13.214	12.9976	13.0644	13.1447	12.5928	12.2877	13.0955	12.0114
sp|P60174|TPIS_HUMAN	P60174	10.851	9.73531	8.75157	9.55573	14.819	14.8025	14.7795	14.7525	15.6674	15.6037	15.5403	15.4696	16.3839	16.3542	16.2769	16.0938
sp|P60228|EIF3E_HUMAN	P60228	10.7605	10.5898	10.4198	10.2671	12.9005	12.8068	12.8828	12.7902	13.4385	13.5448	13.4262	13.3481	13.8631	13.7803	13.7772	13.6785
sp|P60468|SC61B_HUMAN	P60468	12.665	12.9949	13.0479	12.4884	13.0299	14.4512	14.5772	14.4101	14.7036	14.3809	14.1766	14.3914	14.0841	13.3543	13.618	13.699
sp|P60660|MYL6_HUMAN	P60660	17.4647	17.6205	17.4551	17.1948	15.0744	15.1879	14.901	15.0666	15.8403	16.6423	15.8591	16.1273	16.1459	16.3403	16.3867	16.3447
sp|P60842|IF4A1_HUMAN	P60842	11.0724	11.5119	11.7736	11.3626	13.821	13.9677	13.9877	13.978	13.9635	14.0867	14.2206	14.0232	14.2842	14.2266	14.194	14.0882
sp|P60866|RS20_HUMAN	P60866	12.939	13.1341	13.063	12.8285	14.1299	14.5068	14.6361	14.5093	15.07	14.884	14.797	14.9747	15.2842	15.0655	14.8107	15.0705
sp|P60891|PRPS1_HUMAN	P60891	10.9954	11.1701	NA	NA	12.4757	12.5862	12.3106	12.6894	12.5973	12.431	12.6208	12.4459	14.0502	13.7927	13.8397	13.9619
sp|P60900|PSA6_HUMAN	P60900	NA	NA	NA	NA	14.115	14.0477	14.0743	14.0044	14.2658	14.1887	14.1534	14.2493	14.2907	14.0307	14.057	13.9252
sp|P60903|S10AA_HUMAN	P60903	NA	NA	NA	NA	11.3243	11.354	11.1908	11.2563	11.2412	11.2763	11.214	11.3357	15.6205	14.9356	13.2621	13.5698
sp|P60953|CDC42_HUMAN	P60953	11.9337	11.4227	11.2205	11.5192	14.8249	14.9485	14.8716	14.862	15.099	14.9095	15.0165	14.7527	15.0871	14.7562	14.7417	14.9686
sp|P60981|DEST_HUMAN	P60981	12.1821	13.1575	13.0563	11.7819	13.8892	13.7673	13.8059	13.7137	14.6326	14.763	14.9218	14.7742	13.1447	13.308	13.4528	13.545
sp|P60983|GMFB_HUMAN	P60983	NA	NA	NA	NA	12.0993	12.45	12.5649	12.2297	12.4512	12.8557	12.0037	12.3253	12.2343	11.8882	12.2537	12.2429
sp|P61006|RAB8A_HUMAN	P61006	9.20397	9.00554	8.99775	9.54136	11.3901	11.6103	11.6819	11.804	11.2328	11.5412	11.5613	11.2211	11.8299	11.8075	11.4725	11.4849
sp|P61009|SPCS3_HUMAN	P61009	12.4078	11.7506	12.051	12.058	13.0719	13.2409	13.3086	12.9957	13.4633	13.5101	13.3754	13.3072	12.1364	12.3432	12.4808	12.4593
sp|P61011|SRP54_HUMAN	P61011	NA	NA	9.9037	10.5227	11.7521	12.1153	11.6678	11.7323	11.9139	12.4306	11.9562	11.9098	11.6631	11.902	11.0756	NA
sp|P61019|RAB2A_HUMAN	P61019	10.1726	10.2953	11.685	10.2058	13.0606	12.7613	12.7665	12.7875	13.3153	13.4264	13.4563	13.2757	13.5097	13.5966	13.5309	13.1645
sp|P61020|RAB5B_HUMAN	P61020	11.0974	10.975	10.1551	11.0048	13.1254	13.1235	13.2522	13.1169	13.0266	12.9323	12.8176	12.5894	12.8006	12.9421	12.8442	11.9635
sp|P61026|RAB10_HUMAN	P61026	8.71327	8.07034	6.91434	7.84592	12.441	12.0528	12.4293	11.5129	11.5008	11.4169	11.1715	10.7594	11.7723	11.971	11.8776	11.8976
sp|P61081|UBC12_HUMAN	P61081	11.5873	11.5998	11.5234	11.35	13.0117	13.0492	12.5517	12.5777	13.2027	13.1291	13.396	12.6041	14.0494	13.8439	13.905	13.6828
sp|P61086|UBE2K_HUMAN	P61086	NA	NA	NA	NA	12.1047	11.73	12.2676	12.135	12.3048	12.5913	12.5035	12.3924	11.7624	11.6933	11.8078	11.9356
sp|P61088|UBE2N_HUMAN	P61088	NA	NA	NA	NA	12.4793	12.8973	12.4128	NA	13.7357	13.5686	13.7869	13.7244	12.531	12.6015	12.3751	12.0184
sp|P61106|RAB14_HUMAN	P61106	12.7259	12.2669	12.1728	11.8832	13.8326	14.1382	14.1243	14.0218	12.8768	12.7955	12.8614	12.7244	12.9598	13.1042	13.2225	13.2955
sp|P61158|ARP3_HUMAN	P61158	14.454	14.6435	14.3569	14.1583	14.7613	14.7406	14.819	14.7769	15.0529	14.847	14.8374	14.8598	15.1077	15.101	14.9393	14.7022
sp|P61160|ARP2_HUMAN	P61160	13.8121	14.0025	13.7121	13.3157	13.1893	13.5331	13.4567	13.5597	13.6795	14.0179	13.6373	13.7795	14.2622	14.1597	14.1347	13.6396
sp|P61163|ACTZ_HUMAN	P61163	11.3987	9.52968	NA	9.82304	13.7706	13.8762	14.1095	14.0839	12.2067	14.4123	14.2515	14.4071	14.1374	14.1081	13.8665	13.8491
sp|P61201|CSN2_HUMAN	P61201	NA	NA	NA	NA	11.6795	11.3235	11.7549	11.9833	12.5019	12.1096	12.0596	12.2794	12.0325	11.6777	11.3988	11.44
sp|P61221|ABCE1_HUMAN	P61221	NA	NA	NA	NA	12.3307	12.1604	12.3494	12.4547	12.663	12.6093	12.0735	12.5884	12.1256	11.9696	11.8129	12.1541
sp|P61225|RAP2B_HUMAN	P61225	NA	NA	NA	NA	13.3245	13.4919	13.3748	13.5545	11.6343	12.1332	12.3677	11.0843	13.346	13.2619	13.3334	13.0864
sp|P61247|RS3A_HUMAN	P61247	12.8537	13.3984	13.4053	13.2286	13.7984	13.8987	13.8787	13.9126	14.5953	14.6647	14.5725	14.6053	14.6178	14.5908	14.5162	14.4114
sp|P61289|PSME3_HUMAN	P61289	NA	NA	NA	NA	11.5583	11.4633	11.4645	11.7541	12.2778	12.3079	12.5357	12.7796	13.2606	12.4335	12.869	12.852
sp|P61313|RL15_HUMAN	P61313	12.4749	12.957	12.6146	11.7918	14.3634	14.3929	14.3253	14.2692	13.4135	14.2452	14.1664	14.0621	13.8253	13.8991	13.7854	13.8609
sp|P61353|RL27_HUMAN	P61353	14.9143	14.7908	14.4922	14.1701	15.3178	15.4558	15.5453	15.4651	15.1606	15.1642	15.0902	15.1931	14.8923	14.738	14.832	14.715
sp|P61421|VA0D1_HUMAN	P61421	12.9045	12.497	12.7637	12.1682	13.2075	13.211	13.372	13.2426	13.4882	13.4915	13.4741	13.5843	13.0286	13.0639	12.8856	12.8423
sp|P61513|RL37A_HUMAN	P61513	12.5339	12.0342	12.2306	11.9316	12.5631	12.5281	12.6408	12.6739	12.7539	12.342	12.9271	12.9073	12.8811	12.7075	12.6064	12.3846
sp|P61586|RHOA_HUMAN	P61586	9.86547	10.4713	10.194	10.5546	13.01	12.0855	12.1103	12.1277	13.3881	12.5697	12.9544	12.765	13.5332	13.0397	13.0193	12.8144
sp|P61587|RND3_HUMAN	P61587	NA	NA	NA	NA	NA	NA	NA	NA	NA	11.3083	NA	NA	12.3869	12.1731	11.5388	11.8629
sp|P61604|CH10_HUMAN	P61604	NA	12.5111	NA	NA	14.9821	15.1761	15.0857	14.8896	15.4913	15.4386	15.5119	15.5232	16.5158	16.61	16.6397	16.4469
sp|P61619|S61A1_HUMAN	P61619	10.6117	10.6483	11.2532	10.9826	13.0775	13.0128	12.9591	12.8181	13.1563	12.3041	13.2273	13.2019	12.5232	12.8435	12.761	12.5811
sp|P61758|PFD3_HUMAN	P61758	NA	NA	NA	NA	12.7319	12.3916	12.283	12.2862	12.9118	13.0916	12.9681	12.8563	12.9937	13.184	13.1611	13.1308
sp|P61764|STXB1_HUMAN	P61764	10.2449	10.8191	NA	10.3622	11.4141	11.7334	10.7546	11.1476	10.8558	10.5511	10.9034	11.2947	12.9654	12.9817	12.849	12.827
sp|P61769|B2MG_HUMAN	P61769	NA	NA	NA	NA	13.3762	13.3167	13.4128	13.4191	NA	12.2983	12.4691	12.3072	NA	12.0603	12.328	NA
sp|P61803|DAD1_HUMAN	P61803	12.7125	13.2699	13.156	12.9317	14.5937	14.654	14.7088	14.5478	14.569	14.7941	14.6716	14.7546	14.4534	14.1176	14.3213	14.2503
sp|P61812|TGFB2_HUMAN	P61812	14.4332	14.6542	14.6779	14.3446	12.7071	13.1466	12.8187	12.4819	NA	NA	NA	NA	NA	NA	NA	NA
sp|P61916|NPC2_HUMAN	P61916	NA	NA	NA	NA	12.7468	13.0423	12.9459	12.6354	14.385	14.1553	14.1655	14.2766	12.9905	12.8236	12.72	12.5415
sp|P61923|COPZ1_HUMAN	P61923	10.4586	9.45411	9.65907	9.28382	11.0322	10.9564	11.7955	12.148	12.5102	13.4326	12.718	13.0899	12.3443	12.5788	12.2065	12.0873
sp|P61960|UFM1_HUMAN	P61960	NA	NA	NA	NA	12.8822	12.9452	12.9939	12.8164	13.0826	13.112	12.9953	13.1908	12.846	12.8616	12.841	12.8684
sp|P61962|DCAF7_HUMAN	P61962	NA	NA	NA	NA	NA	NA	NA	NA	NA	NA	10.8536	NA	12.0266	11.3643	NA	NA
sp|P61964|WDR5_HUMAN	P61964	NA	11.8451	NA	13.4793	NA	NA	NA	NA	12.537	12.6279	12.6752	13.0242	13.1059	13.5194	13.0525	12.9235
sp|P61970|NTF2_HUMAN	P61970	NA	NA	NA	NA	NA	13.7187	13.227	13.6515	13.8419	14.0358	14.1855	14.2604	13.6265	13.9256	13.8591	13.5538
sp|P61978|HNRPK_HUMAN	P61978	11.4486	10.6671	11.125	10.7488	13.4751	13.5184	13.6	13.4538	15.0226	14.9661	15.0664	14.9143	15.013	14.9673	14.9366	14.7775
sp|P61981|1433G_HUMAN	P61981	10.8292	11.2295	10.3806	9.01572	14.564	14.4297	14.6215	14.6715	14.8725	14.6122	14.7092	14.7923	14.7048	14.5394	14.4467	14.2943
sp|P62070|RRAS2_HUMAN	P62070	12.0555	11.9649	11.5724	11.605	14.0477	14.117	14.0145	13.9454	12.4543	12.2037	11.985	12.3743	12.1388	11.9203	12.1568	11.7834
sp|P62081|RS7_HUMAN	P62081	14.7936	13.9206	14.3872	14.631	14.97	14.8394	14.7868	14.7652	15.5441	15.3932	15.3818	15.2256	15.6	15.5316	15.3782	15.6332
sp|P62136|PP1A_HUMAN	P62136	10.9028	10.9315	9.80609	9.84389	12.4756	12.7728	12.5012	12.6298	12.8047	12.7362	12.8619	12.9589	13.7711	13.6232	13.7709	13.5586
sp|P62140|PP1B_HUMAN	P62140	12.1719	12.4251	12.062	12.0835	13.2801	13.3355	13.179	13.3926	14.6116	14.6058	14.6203	14.6231	14.5318	14.6106	14.4753	12.9731
sp|P62166|NCS1_HUMAN	P62166	NA	NA	NA	NA	NA	NA	NA	NA	10.4773	NA	NA	10.505	12.136	12.0621	11.8326	11.8179
sp|P62191|PRS4_HUMAN	P62191	9.58143	10.3395	10.24	10.5607	13.0536	12.5508	12.8786	13.0538	12.9572	13.0268	12.8074	12.5597	13.8909	13.7136	13.8665	13.5611
sp|P62195|PRS8_HUMAN	P62195	10.3766	10.7268	9.84733	10.1483	13.2382	13.1777	13.2329	13.2179	13.3395	13.3006	13.1978	13.1949	13.8236	13.644	13.616	13.481
sp|P62241|RS8_HUMAN	P62241	13.2404	14.0113	13.5643	13.5232	15.003	15.0459	15.0704	15.0455	14.995	15.0106	15.123	14.7836	15.2713	15.0835	14.995	14.8817
sp|P62244|RS15A_HUMAN	P62244	14.2577	14.4041	14.1355	14.1455	14.8138	14.7919	14.7761	14.8023	15.3182	15.2691	15.3037	15.1212	15.7612	15.4819	15.4364	15.2475
sp|P62249|RS16_HUMAN	P62249	15.0268	15.1989	15.3266	14.9165	15.8163	15.9711	15.917	15.9558	16.2744	16.1465	16.202	16.6302	16.2311	16.1819	16.1554	16.1069
sp|P62258|1433E_HUMAN	P62258	10.8475	10.6458	10.7152	10.4142	14.4403	14.5278	14.4941	14.5023	14.9185	14.9281	14.8762	14.7975	15.1043	15.0974	14.7686	14.6917
sp|P62263|RS14_HUMAN	P62263	14.1573	14.2607	14.0857	13.9544	13.8233	14.0486	14.1375	13.8969	14.3503	14.3608	14.2688	14.1793	14.0645	13.891	14.1765	14.1494
sp|P62266|RS23_HUMAN	P62266	11.2988	11.0979	11.2367	11.0491	13.4007	12.5201	13.3028	12.922	13.2971	12.7424	12.8268	11.5441	13.4439	13.0316	13.2253	12.7983
sp|P62269|RS18_HUMAN	P62269	17.0973	17.1453	16.8888	16.8105	15.8965	16.0766	16.173	16.1093	16.1972	16.1344	16.038	16.2589	16.1348	15.9263	16.0287	16.0326
sp|P62273|RS29_HUMAN	P62273	13.441	12.7577	12.8289	13.0333	12.1522	12.2475	12.2267	12.467	11.3667	10.9857	11.2344	12.8166	12.1094	12.4482	11.5387	12.7247
sp|P62277|RS13_HUMAN	P62277	17.1054	17.1009	17.0086	16.8175	16.1537	16.3178	16.3067	16.3361	16.0255	16.018	15.9725	16.1626	16.0799	16.0245	16.0876	15.9184
sp|P62280|RS11_HUMAN	P62280	13.1245	13.1912	13.1064	13.2744	14.034	14.1721	14.228	14.1017	14.2812	13.9743	14.1517	14.3045	14.3804	13.6181	13.7685	14.0045
sp|P62304|RUXE_HUMAN	P62304	10.4178	NA	9.60166	9.82137	12.8709	12.3432	12.5249	12.1584	13.732	13.8974	13.9594	13.743	14.0974	14.2306	14.0726	14.0906
sp|P62306|RUXF_HUMAN	P62306	NA	NA	NA	NA	12.1077	12.3222	11.8675	12.0783	13.522	13.6035	13.3985	13.3181	13.6267	13.6056	13.1073	13.4951
sp|P62312|LSM6_HUMAN	P62312	NA	NA	NA	NA	11.3774	11.6495	11.5486	NA	13.0394	12.901	12.871	12.6235	12.9591	12.7562	12.8579	12.6957
sp|P62314|SMD1_HUMAN	P62314	8.72364	NA	10.4216	8.53346	13.4813	13.0957	13.4463	13.5485	13.0082	13.0749	11.7931	12.9439	13.6403	9.7068	13.6015	13.7058
sp|P62316|SMD2_HUMAN	P62316	11.3066	10.7194	11.2492	11.1343	12.9059	12.9823	12.993	12.9411	14.2069	14.1919	14.2471	14.1792	14.2102	14.376	14.2495	14.3193
sp|P62318|SMD3_HUMAN	P62318	11.4864	10.8498	11.409	11.31	13.3024	13.3252	13.1423	13.2471	14.0575	13.8879	14.0186	14.088	14.2282	13.9606	14.0184	13.9591
sp|P62330|ARF6_HUMAN	P62330	11.684	11.6783	11.7215	11.6868	13.2408	13.2205	13.1259	13.3243	12.9389	13.3324	13.1952	12.9674	12.5506	12.4607	11.8558	12.5073
sp|P62333|PRS10_HUMAN	P62333	11.1451	11.1381	10.8809	10.9026	13.4431	13.6531	13.511	13.7526	13.917	13.8884	13.843	13.8049	14.073	13.867	13.7771	13.6025
sp|P62424|RL7A_HUMAN	P62424	14.1651	14.4975	14.3629	14.2096	14.8872	14.8412	14.8418	14.6889	15.2434	15.3233	15.1673	15.2096	15.0233	14.8898	14.8845	14.8888
sp|P62495|ERF1_HUMAN	P62495	9.95556	9.09576	10.4498	9.88437	13.3497	13.3292	13.319	13.1794	13.4039	13.2047	13.2602	13.2127	13.4144	13.2916	13.2689	13.2173
sp|P62633|CNBP_HUMAN	P62633	NA	NA	NA	NA	12.1195	12.1796	12.0584	11.9229	12.0958	12.6607	12.4732	12.6317	12.8814	12.9128	12.8598	12.8323
sp|P62701|RS4X_HUMAN	P62701	14.2015	14.3566	14.4994	14.3277	14.9871	15.009	14.8946	15.0357	15.2881	15.351	15.3049	15.3829	15.6197	15.5796	15.5358	15.4197
sp|P62750|RL23A_HUMAN	P62750	14.2261	13.7412	13.801	13.9647	14.7689	14.925	14.9289	15.0108	14.6919	14.6988	14.7907	14.6332	14.6941	14.5022	14.3922	14.3209
sp|P62753|RS6_HUMAN	P62753	13.1452	13.6013	13.3729	13.3069	14.893	14.9617	15.1328	15.1086	14.4139	14.6586	14.7063	14.4698	14.7688	14.6999	14.7136	14.6314
sp|P62805|H4_HUMAN	P62805	16.3518	16.0967	16.0117	16.2316	13.85	14.1157	14.3301	14.2849	14.6261	14.743	14.6975	14.5582	14.9758	14.8909	15.0218	14.8162
sp|P62820|RAB1A_HUMAN	P62820	10.7596	10.5366	11.0996	NA	13.6181	13.6787	13.8247	13.7611	13.5464	13.528	13.412	13.6607	13.9321	13.9758	13.8391	13.7636
sp|P62826|RAN_HUMAN	P62826	14.0291	13.5826	13.9599	13.4129	14.768	14.8527	14.8983	14.9614	14.9796	14.983	14.8325	14.875	15.6787	15.4869	15.2439	15.2117
sp|P62829|RL23_HUMAN	P62829	14.9382	14.7891	14.6265	14.6284	15.2962	15.4699	15.5722	15.4742	15.8523	15.7146	15.7037	16.1357	15.5922	15.3749	14.8288	15.075
sp|P62834|RAP1A_HUMAN	P62834	9.91887	NA	9.86017	NA	11.4199	11.7563	11.7119	11.8498	11.2468	12.0113	11.9993	11.8371	11.8416	11.7971	11.779	11.7961
sp|P62841|RS15_HUMAN	P62841	12.8747	12.6361	13.0777	12.6384	13.5297	13.472	13.4649	13.7458	13.1295	13.2849	13.4635	12.8933	13.4987	13.3544	13.3019	13.3129
sp|P62847|RS24_HUMAN	P62847	15.5028	15.391	15.1558	15.079	16.3218	16.4206	16.3041	16.4203	15.1282	15.7914	15.7627	14.6768	15.8363	15.8932	15.8212	15.6446
sp|P62851|RS25_HUMAN	P62851	17.0323	17.2976	17.4317	17.1807	16.4853	16.7571	16.7812	16.7625	17.479	17.2958	17.3242	17.6293	17.3438	17.1402	17.2518	17.2906
sp|P62857|RS28_HUMAN	P62857	13.7773	13.1289	12.8924	13.0807	14.3858	14.4082	14.3973	14.3443	14.7761	14.8813	14.9028	14.852	14.0977	14.3511	14.2059	14.0943
sp|P62861|RS30_HUMAN	P62861	12.5708	14.1262	13.6748	14.2639	13.6721	13.9567	13.9008	13.9146	13.7798	13.6011	13.6111	13.7831	13.0795	11.4685	12.8894	12.5512
sp|P62873|GBB1_HUMAN	P62873	10.5982	10.7031	10.3061	10.4215	11.2396	11.646	11.7941	11.74	12.7032	12.8217	12.2593	12.3213	13.6669	13.3608	13.2344	13.2349
sp|P62875|RPAB5_HUMAN	P62875	13.6308	13.5481	NA	13.2674	NA	NA	NA	NA	NA	NA	NA	13.249	NA	NA	NA	NA
sp|P62877|RBX1_HUMAN	P62877	NA	11.9558	NA	NA	12.9978	12.8171	13.0184	12.9624	13.1297	13.5661	12.9319	13.2224	13.5178	13.6938	13.6016	13.3894
sp|P62879|GBB2_HUMAN	P62879	NA	9.70083	10.3314	10.1339	12.4502	12.7854	12.8356	12.8475	11.5103	12.7307	12.6661	11.7759	13.7054	13.5807	13.3678	13.4057
sp|P62888|RL30_HUMAN	P62888	13.3488	13.1173	13.1412	13.0161	14.0013	13.9095	13.8354	14.0255	14.7823	14.6748	14.6822	14.6469	14.6795	14.5769	14.2528	14.4086
sp|P62899|RL31_HUMAN	P62899	16.9728	16.5598	16.7197	16.4682	15.314	15.5791	15.4375	15.3922	16.0604	15.8186	15.7668	15.8044	15.7634	15.5926	15.5456	15.6041
sp|P62906|RL10A_HUMAN	P62906	11.4681	11.6548	10.7777	11.5044	13.2392	13.187	13.1827	13.1445	14.1522	14.3493	14.2646	14.1647	14.0602	13.9231	13.9786	13.7867
sp|P62910|RL32_HUMAN	P62910	11.511	12.1674	12.4311	12.071	13.8001	13.8426	13.0452	13.9393	13.4081	13.4502	13.4086	13.6199	13.8072	13.3905	13.4455	13.6421
sp|P62913|RL11_HUMAN	P62913	13.9141	13.9288	13.5375	13.6789	15.2144	15.3147	15.5114	15.3974	15.4776	15.5515	15.5638	15.6543	15.4257	15.247	15.3054	15.2106
sp|P62917|RL8_HUMAN	P62917	11.8964	12.6681	11.6653	12.2113	14.0581	14.111	14.1097	14.1188	14.0704	13.894	14.1209	14.033	13.9202	13.6242	13.7475	13.3352
sp|P62937|PPIA_HUMAN	P62937	10.4317	10.3526	11.3216	10.4258	14.9053	14.366	14.7409	14.7186	15.0009	14.9217	15.0574	15.1116	15.4601	15.3084	15.2464	15.2663
sp|P62942|FKB1A_HUMAN	P62942	9.59183	NA	NA	NA	15.0581	15.2016	14.9624	14.9992	15.2357	15.5009	15.5353	15.637	14.4523	14.6704	14.4999	14.4465
sp|P62995|TRA2B_HUMAN	P62995	NA	NA	11.5658	NA	11.6688	11.6533	11.7557	11.3553	12.8888	12.683	13.0058	12.8446	12.7795	12.9746	12.6921	13.0481
sp|P63000|RAC1_HUMAN	P63000	12.0596	10.101	NA	11.2681	10.5403	12.4622	13.141	10.3864	13.7577	10.355	10.2889	13.2826	13.137	12.6207	10.5635	NA
sp|P63010|AP2B1_HUMAN	P63010	10.2627	10.5262	10.6081	10.0326	12.7908	12.7449	12.9498	12.7693	12.8891	13.2109	13.1775	12.6905	12.9033	12.8839	12.885	12.9519
sp|P63096|GNAI1_HUMAN	P63096	9.23565	9.03706	9.72399	9.66549	8.28954	9.22208	NA	8.20124	8.94257	10.8851	10.8661	9.73547	11.7793	11.0314	11.0238	11.2375
sp|P63098|CANB1_HUMAN	P63098	NA	NA	NA	NA	NA	11.1713	NA	NA	13.0805	12.5497	12.8349	12.101	NA	11.2864	NA	NA
sp|P63104|1433Z_HUMAN	P63104	10.4338	9.99166	10.9515	10.4441	15.4392	15.403	15.4115	15.407	15.7296	15.5833	15.6066	15.4176	16.2423	16.2529	16.2861	16.1967
sp|P63151|2ABA_HUMAN	P63151	NA	11.5817	NA	10.8377	12.9731	13.1383	13.0578	13.09	12.7288	12.778	NA	12.6681	13.387	13.1467	12.9199	13.0252
sp|P63165|SUMO1_HUMAN	P63165	NA	NA	NA	NA	NA	NA	NA	NA	11.3165	10.9095	NA	NA	11.3363	NA	10.4753	10.5249
sp|P63172|DYLT1_HUMAN	P63172	NA	NA	9.94839	NA	12.1778	11.6876	12.1237	12.0772	12.4394	12.1374	11.8677	12.3885	12.3201	11.8134	11.9926	11.7153
sp|P63173|RL38_HUMAN	P63173	15.4092	15.2853	15.1244	14.8421	13.8286	13.887	13.8513	13.9135	14.5903	14.7474	14.8077	14.7884	15.3439	15.2903	15.2513	15.3649
sp|P63208|SKP1_HUMAN	P63208	11.0451	10.8729	10.1985	10.6203	12.613	12.7781	12.8799	11.3359	12.9537	13.0645	12.9228	13.0156	13.1972	13.3678	13.3026	13.1228
sp|P63220|RS21_HUMAN	P63220	10.1269	NA	NA	NA	13.1137	13.1461	13.174	13.1462	13.5297	14.0344	13.8514	14.1261	13.5348	13.6489	13.6194	13.6063
sp|P63241|IF5A1_HUMAN	P63241	NA	NA	11.3111	NA	11.4652	NA	13.0491	11.455	12.7364	13.4259	12.8759	11.2557	12.8653	13.4228	13.1738	13.6348
sp|P63244|RACK1_HUMAN	P63244	12.5756	12.1952	12.5595	12.3087	14.4397	14.4137	14.6052	14.4893	14.8167	14.7387	14.6383	14.6919	14.9541	14.9668	14.8372	14.6913
sp|P63261|ACTG_HUMAN	P63261	14.3954	15.0608	14.6074	14.4307	15.4972	15.6321	15.9436	15.4789	16.0744	15.644	16.0091	15.8499	15.6086	15.5701	15.4038	15.2838
sp|P63279|UBC9_HUMAN	P63279	10.3032	9.96826	10.3395	10.3462	12.8344	12.2395	12.74	12.7681	13.3392	13.4668	12.7965	12.4299	12.821	11.9944	12.8419	12.5658
sp|P67809|YBOX1_HUMAN	P67809	8.30579	8.74552	8.78109	9.73046	12.4897	12.5315	12.8942	12.6739	12.5876	12.4805	12.588	12.6457	11.8928	11.7223	11.7404	11.9784
sp|P67812|SC11A_HUMAN	P67812	13.8745	13.9435	13.7107	13.6581	14.4547	14.508	14.5493	14.5319	14.236	14.6207	14.4808	13.9671	13.338	13.3786	13.7596	13.5977
sp|P67870|CSK2B_HUMAN	P67870	12.906	13.4596	12.6233	12.4792	10.1836	10.2321	10.2183	10.305	10.6642	11.0318	10.5511	9.96693	11.6941	11.4066	10.8577	10.6427
sp|P67936|TPM4_HUMAN	P67936	12.9905	13.8071	12.9676	13.0181	15.3053	15.4349	15.3968	15.3625	16.4651	16.415	16.4088	16.4519	15.8844	15.7755	15.7129	15.7247
sp|P68036|UB2L3_HUMAN	P68036	NA	NA	NA	NA	13.6027	13.836	13.6532	13.6531	NA	13.5651	13.4669	13.3502	12.7918	13.4015	13.7289	13.6599
sp|P68366|TBA4A_HUMAN	P68366	10.4833	10.3066	10.8155	9.69592	10.6015	10.5127	10.5945	10.5641	8.67069	10.3656	10.5323	8.92159	15.6845	15.4945	15.4084	15.3768
sp|P68402|PA1B2_HUMAN	P68402	10.2188	9.85645	9.56286	10.3346	13.8246	13.8812	13.5899	13.802	13.8188	14.2212	13.8692	13.0643	13.0634	13.1397	12.65	12.7854
sp|P68431|H31_HUMAN	P68431	NA	NA	NA	NA	13.7233	10.9084	12.6673	11.4953	13.4258	14.3943	10.9052	13.0749	14.778	15.2482	14.7603	15.3531
sp|P78344|IF4G2_HUMAN	P78344	9.78547	10.0657	10.1115	9.53359	11.6309	11.9239	11.4634	11.6699	13.221	13.0663	13.0807	12.6932	13.1985	12.9331	12.9524	12.6133
sp|P78347|GTF2I_HUMAN	P78347	12.0746	12.1538	12.1025	11.8729	9.44679	10.3195	9.37949	10.7484	12.5886	12.4754	12.3939	12.5093	11.7967	11.9963	12.1929	11.8713
sp|P78357|CNTP1_HUMAN	P78357	NA	NA	NA	NA	10.3763	11.3523	11.486	9.98111	12.3565	11.7679	11.3132	12.4269	12.073	11.3145	10.899	11.2595
sp|P78371|TCPB_HUMAN	P78371	12.8461	12.5981	12.4903	12.6073	12.8256	13.0053	12.8167	12.8946	13.49	13.4894	13.4968	13.3582	14.3935	14.1267	14.133	14.0326
sp|P78406|RAE1L_HUMAN	P78406	NA	NA	NA	NA	NA	NA	NA	NA	12.5022	11.7878	12.1324	11.7663	11.8675	12.3756	12.0008	11.6484
sp|P78417|GSTO1_HUMAN	P78417	11.1477	10.1501	NA	10.2558	14.5399	14.5029	14.6772	14.5552	13.5452	13.5138	13.5931	13.9194	14.2682	14.2096	14.2255	14.155
sp|P78527|PRKDC_HUMAN	P78527	10.6151	10.7437	10.7135	10.6145	12.0967	12.0761	12.2407	12.0543	12.8618	12.9891	12.8523	12.5916	13.463	13.4398	13.3942	13.3192
sp|P78539|SRPX_HUMAN	P78539	12.0991	11.7813	11.7236	11.8205	NA	NA	11.5999	NA	12.0663	11.9075	NA	NA	NA	NA	NA	NA
sp|P78559|MAP1A_HUMAN	P78559	10.1972	10.2171	NA	10.3299	12.0766	12.1345	12.4643	12.2651	12.0689	11.8358	11.8235	12.0426	13.427	13.1289	13.2678	12.9806
sp|P80303|NUCB2_HUMAN	P80303	NA	NA	NA	NA	12.4483	12.5766	12.3318	NA	12.0368	11.9837	12.2582	11.6734	11.2018	11.4937	11.8322	11.7655
sp|P80723|BASP1_HUMAN	P80723	6.96666	6.9792	6.92154	9.76658	12.598	12.7835	12.7389	12.6569	13.2197	13.0077	13.0781	13.3914	14.1173	13.9413	13.8804	13.8539
sp|P81605|DCD_HUMAN	P81605	14.3604	13.2569	13.8148	13.9198	12.0786	12.4282	11.9781	11.8722	NA	NA	11.578	11.7474	NA	11.7039	NA	NA
sp|P82650|RT22_HUMAN	P82650	11.7189	12.1413	11.76	11.4999	12.0642	12.0981	12.48	12.1304	12.6476	12.6109	12.4461	12.5205	12.2417	12.4803	12.3686	12.368
sp|P82673|RT35_HUMAN	P82673	9.60025	NA	9.10193	9.88731	11.6411	11.4174	11.5102	11.4636	12.0281	12.0182	11.9383	11.7206	12.3733	12.3659	12.2619	12.2351
sp|P82675|RT05_HUMAN	P82675	NA	10.2579	10.8525	9.8017	10.881	10.611	10.9667	10.8213	11.6035	11.4622	11.105	11.6586	12.325	12.0415	11.9811	11.942
sp|P82909|KGD4_HUMAN	P82909	12.1857	11.3759	11.1787	11.1838	11.6104	12.518	12.2989	11.5674	12.3255	12.5678	12.4231	12.6123	12.8838	12.3161	12.8125	12.2464
sp|P82914|RT15_HUMAN	P82914	11.9411	12.6836	12.3871	12.2541	12.0597	12.1451	12.677	12.1764	12.53	12.6897	12.4703	12.7916	12.7623	12.8397	12.8873	11.8903
sp|P82921|RT21_HUMAN	P82921	NA	11.3288	11.4478	11.4158	12.2016	11.3854	11.7047	12.4632	12.5105	12.4491	11.6245	12.178	12.4262	12.3143	11.8444	12.1245
sp|P82930|RT34_HUMAN	P82930	11.05	NA	10.3778	10.314	11.9491	12.3088	12.0787	11.9569	11.2808	11.673	11.1153	11.6224	10.6472	11.7386	10.3611	11.5747
sp|P82933|RT09_HUMAN	P82933	10.4963	10.9011	9.79495	10.3568	10.5055	10.4696	11.3631	11.0523	12.2232	12.383	12.1831	12.4065	12.651	10.8004	12.1865	10.8405
sp|P82979|SARNP_HUMAN	P82979	NA	NA	10.5879	NA	11.5809	11.5762	11.0411	10.9062	13.6589	13.6076	13.4102	13.5679	13.1606	13.0766	13.005	13.106
sp|P83110|HTRA3_HUMAN	P83110	11.7171	NA	11.686	NA	NA	NA	NA	NA	NA	NA	NA	NA	12.4882	10.7573	NA	NA
sp|P83111|LACTB_HUMAN	P83111	12.5525	12.7589	11.8017	12.2408	11.9764	12.1065	12.0486	12.1682	10.7771	10.9518	10.8846	10.9143	11.8338	12.0817	12.1795	11.7113
sp|P83436|COG7_HUMAN	P83436	NA	NA	NA	NA	11.8641	12.0684	12.3154	11.3686	11.6144	NA	11.1004	11.0897	11.042	NA	NA	11.1893
sp|P83731|RL24_HUMAN	P83731	14.6303	14.4962	14.3234	14.2828	15.8863	16.1057	16.0731	16.0426	15.7354	15.6691	15.5849	15.6669	15.5043	15.2452	15.1636	15.0048
sp|P84085|ARF5_HUMAN	P84085	10.8758	9.49799	NA	NA	12.4814	12.5999	12.4859	12.6523	NA	12.1025	12.7175	12.5594	12.9519	13.0628	13.0538	13.3211
sp|P84090|ERH_HUMAN	P84090	11.8072	11.7874	11.6589	11.5184	12.34	12.4016	12.3634	12.2651	14.2736	14.1001	14.0232	13.9601	13.9524	13.8844	13.8925	13.7479
sp|P84095|RHOG_HUMAN	P84095	10.9877	11.2801	10.7021	11.0566	12.9335	13.1651	12.881	12.9582	12.8695	12.6559	12.6518	12.7759	13.5418	13.3299	12.719	13.2203
sp|P84098|RL19_HUMAN	P84098	14.3522	14.4508	14.7174	14.2652	16.1496	16.2409	16.3279	16.2135	16.458	16.5442	16.3053	16.1636	15.9968	16.1094	15.9937	15.7443
sp|P84103|SRSF3_HUMAN	P84103	11.3986	NA	11.5735	11.7432	12.8309	13.0754	12.6057	13.0251	14.4268	14.7094	14.3935	14.0749	14.7965	13.9308	14.4228	14.0292
sp|P84157|MXRA7_HUMAN	P84157	9.94376	NA	NA	NA	13.6433	14.0611	14.0135	NA	NA	NA	11.5764	12.011	NA	NA	12.9026	12.5365
sp|P98082|DAB2_HUMAN	P98082	8.8278	10.1103	9.74535	NA	13.0656	13.45	13.5886	13.3787	12.043	11.9761	9.58183	12.2199	12.0703	12.2876	11.1658	12.1474
sp|P98095|FBLN2_HUMAN	P98095	16.2095	16.3376	16.2555	16.2935	14.8728	14.9535	15.2631	15.0424	12.8624	12.6453	12.6522	12.982	NA	NA	NA	10.9112
sp|P98160|PGBM_HUMAN	P98160	15.1409	15.3544	15.2469	15.2227	13.6317	13.6648	14.1974	14.0204	12.4101	12.0454	11.9546	12.6929	9.39509	8.33952	8.36784	8.404
sp|P98170|XIAP_HUMAN	P98170	NA	NA	NA	NA	NA	NA	NA	NA	NA	NA	NA	NA	11.1342	11.5366	11.1366	11.1867
sp|P98175|RBM10_HUMAN	P98175	NA	NA	NA	NA	NA	10.6255	NA	NA	11.7931	11.7023	11.2871	NA	11.5397	11.6283	11.7333	NA
sp|P98179|RBM3_HUMAN	P98179	12.0361	NA	NA	NA	13.0444	NA	NA	NA	NA	NA	13.5369	NA	12.3134	NA	12.7886	NA
sp|P98194|AT2C1_HUMAN	P98194	NA	NA	NA	NA	11.8196	11.8139	11.8404	11.8244	11.2946	11.0573	11.4813	11.9876	12.0947	11.3816	11.9347	12.2493
sp|P99999|CYC_HUMAN	P99999	9.40486	NA	9.48998	9.21853	11.7337	10.5839	11.3327	10.9506	11.9482	12.24	11.8775	11.6689	12.5866	12.1986	11.2835	11.9064
sp|Q00059|TFAM_HUMAN	Q00059	13.6058	13.14	12.9867	13.1615	10.8825	10.8539	10.8834	11.5184	12.8915	13.0357	12.7602	12.8024	14.024	14.1802	14.3721	14.4022
sp|Q00169|PIPNA_HUMAN	Q00169	NA	10.5299	10.0846	10.4888	12.2033	12.1935	12.467	12.1056	13.2596	12.6845	13.0449	12.8303	13.33	12.6811	12.8527	12.5501
sp|Q00325|MPCP_HUMAN	Q00325	12.432	12.4539	12.1487	12.3143	13.9923	14.1379	13.9943	14.1144	14.5735	14.6039	14.6325	14.6609	14.6442	14.4898	14.324	14.358
sp|Q00341|VIGLN_HUMAN	Q00341	9.83312	9.75159	10.5037	8.91657	12.6887	12.8524	12.8035	12.8399	13.4205	13.4629	13.4777	13.3476	12.8763	12.7189	12.8853	12.6809
sp|Q00535|CDK5_HUMAN	Q00535	NA	NA	NA	NA	NA	NA	NA	NA	10.2687	NA	10.5583	10.2771	12.5557	12.5508	12.2567	12.4986
sp|Q00577|PURA_HUMAN	Q00577	10.2372	9.85844	9.97425	10.1611	11.7996	12.3125	12.2047	11.9778	11.4178	11.6236	11.7543	12.0504	11.8168	11.6989	11.8254	11.3382
sp|Q00610|CLH1_HUMAN	Q00610	10.6391	10.955	10.6548	10.9119	13.86	13.7156	13.8715	13.7755	13.9256	13.9998	13.946	13.8897	14.6346	14.4787	14.4433	14.4269
sp|Q00653|NFKB2_HUMAN	Q00653	NA	NA	NA	NA	NA	11.0208	10.9322	10.8741	10.9012	11.1939	10.9082	10.8706	12.5136	12.3288	12.2655	11.8641
sp|Q00688|FKBP3_HUMAN	Q00688	11.1709	10.025	10.5903	NA	13.0589	13.0003	13.5648	12.9529	14.136	13.86	13.9839	13.6634	13.5998	13.1779	13.1988	12.8497
sp|Q00765|REEP5_HUMAN	Q00765	NA	NA	12.5057	11.9738	15.4469	NA	NA	14.8003	14.5195	NA	NA	NA	15.0089	13.4626	12.9803	13.2923
sp|Q00796|DHSO_HUMAN	Q00796	NA	NA	NA	NA	10.4081	10.1121	NA	NA	11.7206	10.9355	11.5426	NA	12.7968	12.7739	12.4441	12.4173
sp|Q00839|HNRPU_HUMAN	Q00839	12.8656	12.6447	12.8717	13.067	13.2921	13.2811	13.2681	13.1807	14.6959	14.516	14.5946	14.4263	15.0771	14.6542	14.7744	14.6826
sp|Q01081|U2AF1_HUMAN	Q01081	10.7332	NA	NA	11.1151	12.0672	12.134	11.8734	11.9609	11.9924	11.437	11.6621	12.7404	12.0134	11.8484	12.2564	12.8994
sp|Q01082|SPTB2_HUMAN	Q01082	10.0537	9.88698	9.62508	10.2147	13.4685	13.4957	13.6783	13.6105	13.459	13.3286	13.3275	13.249	13.5242	13.1563	13.3378	13.0962
sp|Q01085|TIAR_HUMAN	Q01085	NA	NA	10.5749	NA	12.1916	12.3627	12.2901	12.2132	12.8799	12.7186	12.8277	12.5219	13.6696	13.473	13.3211	13.3001
sp|Q01105|SET_HUMAN	Q01105	NA	NA	NA	NA	13.8072	14.4401	14.2835	14.1805	13.4597	15.0137	14.566	14.048	12.8726	14.6116	15.2842	15.0934
sp|Q01433|AMPD2_HUMAN	Q01433	NA	11.1516	11.037	NA	12.0405	12.2854	12.2506	12.3398	12.2799	11.8764	12.2219	12.4219	13.5674	13.6696	13.6862	13.5246
sp|Q01469|FABP5_HUMAN	Q01469	NA	NA	NA	NA	12.8751	12.9396	12.4056	12.5208	13.6103	13.965	13.627	13.8545	12.1555	12.6545	12.2343	12.2787
sp|Q01518|CAP1_HUMAN	Q01518	9.26345	9.81165	9.70435	9.92384	14.3566	14.2312	14.269	14.2523	13.8931	14.0803	13.8343	14.0757	14.255	14.0954	14.222	14.1201
sp|Q01581|HMCS1_HUMAN	Q01581	10.4603	NA	10.5595	NA	11.9644	12.5404	11.7873	12.243	NA	NA	NA	NA	11.1414	10.9244	11.1683	NA
sp|Q01780|EXOSX_HUMAN	Q01780	NA	9.19833	NA	NA	9.52591	10.1765	9.26493	10.1681	10.0822	NA	9.67008	10.8858	10.6051	10.5078	10.5334	11.0325
sp|Q01813|PFKAP_HUMAN	Q01813	11.1532	10.5608	10.1646	9.83391	12.0947	11.9913	11.8692	12.0984	13.15	13.2154	13.077	12.7373	14.0145	13.995	14.0875	14.0031
sp|Q01844|EWS_HUMAN	Q01844	NA	NA	8.85899	NA	12.791	12.8765	12.9189	12.7653	13.507	13.3389	13.4476	13.1648	12.6198	12.6502	12.5356	12.4489
sp|Q01970|PLCB3_HUMAN	Q01970	NA	NA	NA	NA	NA	NA	9.56302	10.0273	9.79384	9.26029	9.16612	9.64087	11.2878	10.8446	10.9172	11.0723
sp|Q01995|TAGL_HUMAN	Q01995	13.6396	13.3965	13.35	13.2376	14.9719	15.0309	14.8709	14.9688	15.3761	15.2153	15.1727	14.9761	NA	NA	NA	NA
sp|Q02218|ODO1_HUMAN	Q02218	9.90656	10.6098	10.7182	10.6555	13.1269	13.112	13.0632	13.1534	12.6182	12.7613	12.6516	12.7509	13.5958	13.3929	13.4787	13.3187
sp|Q02252|MMSA_HUMAN	Q02252	NA	NA	NA	NA	11.7033	11.7079	11.9959	11.7685	12.2119	12.2724	12.2105	11.5963	12.4278	12.3198	12.301	12.1418
sp|Q02388|CO7A1_HUMAN	Q02388	12.5376	12.6926	12.6274	12.279	9.27361	10.5815	10.7886	10.3029	10.5974	9.90761	9.05062	11.3787	9.56152	9.05513	NA	9.2292
sp|Q02447|SP3_HUMAN	Q02447	NA	10.9618	11.1524	NA	NA	NA	NA	NA	10.5	10.7664	10.8229	NA	11.6873	11.4595	11.6491	11.619
sp|Q02539|H11_HUMAN	Q02539	12.0642	12.0027	12.01	11.8835	10.3525	10.4574	11.4459	10.1576	12.4768	12.6906	12.5352	13.2374	13.8782	13.6256	13.4249	13.1567
sp|Q02543|RL18A_HUMAN	Q02543	12.0432	12.2821	12.3236	12.293	13.8988	13.9441	13.9408	13.9518	13.9926	13.9415	13.9595	14.0055	13.928	13.9065	13.8493	13.9555
sp|Q02790|FKBP4_HUMAN	Q02790	10.7657	NA	NA	11.1345	11.086	11.2632	11.3513	10.8698	12.5696	12.419	12.5188	12.0064	13.0728	12.97	12.8979	12.6504
sp|Q02809|PLOD1_HUMAN	Q02809	11.3266	11.4918	11.7789	11.8705	13.0433	13.0265	13.0504	13.0604	13.23	13.3358	13.2058	12.5306	12.7408	12.1775	12.1624	12.2418
sp|Q02818|NUCB1_HUMAN	Q02818	NA	NA	NA	NA	12.3356	12.1949	12.3003	12.0971	12.5212	12.4777	12.3118	12.0721	12.7508	12.7278	12.6345	12.5419
sp|Q02878|RL6_HUMAN	Q02878	13.6558	13.9554	13.7207	13.8069	14.9351	15.1177	15.1098	15.0841	15.1066	15.2718	15.0493	14.9057	15.0168	14.9552	14.9331	14.9175
sp|Q02880|TOP2B_HUMAN	Q02880	12.0576	12.3612	12.4076	12.5575	10.8516	10.961	11.0906	11.2547	13.1695	13.3032	13.0535	12.9929	12.9571	12.7068	12.96	12.8538
sp|Q02952|AKA12_HUMAN	Q02952	9.2452	9.73704	9.24692	9.93066	13.1308	13.2298	13.4092	13.2482	12.4978	12.3295	12.4167	12.3607	13.4834	13.1148	13.2281	13.0711
sp|Q02978|M2OM_HUMAN	Q02978	10.9712	10.7304	11.2502	10.7984	12.2218	12.1389	11.9539	12.1458	12.0743	12.1435	12.3195	12.2391	12.6049	13.0921	12.8768	13.0446
sp|Q03001|DYST_HUMAN	Q03001	7.93951	8.26179	7.49888	8.19903	11.7656	11.3384	11.5732	11.8758	10.4752	10.4896	10.3509	10.6715	10.7037	10.6726	10.7656	10.6404
sp|Q03135|CAV1_HUMAN	Q03135	13.7	14.8672	13.5291	14.3152	14.1812	13.4682	14.6693	14.1628	12.7228	13.0026	12.2191	12.7063	11.5247	12.5557	12.0819	12.3264
sp|Q03154|ACY1_HUMAN	Q03154	NA	10.9916	NA	NA	11.1087	11.5194	11.7658	11.2705	11.4434	11.2838	10.9604	10.889	11.8195	12.201	11.9016	11.5506
sp|Q03252|LMNB2_HUMAN	Q03252	11.5308	11.4171	11.4775	11.6292	12.888	12.8567	12.8801	12.8644	13.752	13.8573	13.7173	13.5849	13.5585	13.4863	13.7508	13.6791
sp|Q03405|UPAR_HUMAN	Q03405	NA	NA	NA	NA	12.8295	13.2895	13.3032	12.8537	NA	NA	NA	NA	13.3631	13.1591	13.3825	13.3066
sp|Q03518|TAP1_HUMAN	Q03518	NA	9.86662	NA	NA	12.3696	12.2043	12.2032	12.3717	9.42342	11.1067	10.2917	10.6512	9.65107	10.569	10.6912	10.8558
sp|Q03519|TAP2_HUMAN	Q03519	NA	NA	NA	NA	13.8678	14.1137	13.7367	NA	NA	NA	NA	NA	NA	NA	NA	NA
sp|Q03701|CEBPZ_HUMAN	Q03701	NA	NA	NA	NA	9.87272	NA	9.95892	NA	10.2132	9.88173	10.3273	NA	11.5855	11.7353	11.373	11.4005
sp|Q04206|TF65_HUMAN	Q04206	NA	NA	NA	NA	12.7049	12.7201	12.3327	12.6432	NA	12.2041	12.2866	12.2248	12.5008	12.9319	13.1139	12.4032
sp|Q04323|UBXN1_HUMAN	Q04323	NA	NA	NA	NA	10.7151	10.8613	10.6888	10.9336	11.1675	11.889	10.7487	11.2372	11.7704	12.1394	12.4031	12.4628
sp|Q04446|GLGB_HUMAN	Q04446	11.7441	11.32	11.4425	11.3808	13.4994	13.3651	13.5964	13.6025	13.0618	12.8767	12.6904	12.7789	13.4659	13.1681	13.2579	13.0626
sp|Q04637|IF4G1_HUMAN	Q04637	9.77593	9.46243	8.84953	9.05831	13.168	13.1076	13.2205	13.0815	13.0627	13.2546	13.1427	12.9836	13.554	13.5726	13.3442	13.3475
sp|Q04721|NOTC2_HUMAN	Q04721	9.1883	NA	NA	9.26461	10.011	9.07075	9.03825	9.19624	10.3701	11.1254	10.3049	10.6232	11.3331	10.8707	10.008	11.1553
sp|Q04760|LGUL_HUMAN	Q04760	9.61574	9.34477	9.57367	NA	13.6159	13.577	13.5071	13.3157	13.9182	13.8986	13.7707	13.6597	12.7576	12.2411	12.2888	12.4792
sp|Q04837|SSBP_HUMAN	Q04837	12.926	12.4988	12.435	12.5872	13.1911	13.1666	12.527	12.3886	13.1832	13.0801	13.0742	13.1741	14.0844	13.9341	14.2213	13.916
sp|Q04917|1433F_HUMAN	Q04917	9.99433	NA	10.3881	9.91506	13.452	13.4449	13.4284	13.5146	13.3296	13.1899	13.2254	13.1651	13.738	13.7233	13.6533	13.64
sp|Q05086|UBE3A_HUMAN	Q05086	NA	NA	NA	NA	NA	NA	10.183	10.6307	10.5064	NA	NA	NA	NA	10.9079	NA	10.4122
sp|Q05193|DYN1_HUMAN	Q05193	9.10294	9.30448	9.49817	9.00743	10.0609	10.0064	10.0915	10.1284	9.97595	10.4526	10.1047	10.0729	12.4532	12.2132	11.9399	12.118
sp|Q05209|PTN12_HUMAN	Q05209	NA	NA	NA	NA	11.2387	10.2895	10.7524	10.5755	NA	NA	NA	NA	10.4658	10.9465	10.3102	NA
sp|Q05397|FAK1_HUMAN	Q05397	NA	NA	NA	NA	12.2978	12.4557	12.6611	12.0614	11.275	11.4707	11.443	11.5617	11.6747	11.013	11.2596	11.1566
sp|Q05519|SRS11_HUMAN	Q05519	NA	9.49737	NA	NA	10.548	12.5087	12.3786	12.0864	13.8519	10.3223	10.0245	9.93939	13.7725	12.0093	13.3658	12.791
sp|Q05682|CALD1_HUMAN	Q05682	11.897	11.8919	11.5867	11.4956	13.592	13.6371	13.6984	13.6784	14.294	14.2477	14.2892	14.2131	12.5092	12.5349	12.2103	12.3127
sp|Q05707|COEA1_HUMAN	Q05707	NA	NA	NA	NA	NA	NA	NA	NA	13.8584	13.8582	13.7331	13.4375	NA	12.0892	NA	11.7328
sp|Q06124|PTN11_HUMAN	Q06124	NA	NA	NA	NA	11.2522	11.0337	10.9141	10.7992	11.9602	11.9687	11.9651	11.0746	11.3537	11.6806	11.3727	10.8336
sp|Q06136|KDSR_HUMAN	Q06136	11.1162	10.5889	NA	NA	11.6169	11.5277	11.3932	11.3479	12.2506	11.4338	12.0182	11.5861	11.8784	11.8197	12.0831	11.8398
sp|Q06210|GFPT1_HUMAN	Q06210	10.3892	10.6964	10.5024	10.817	12.6203	12.6703	12.6279	12.3133	12.4548	12.4734	12.2023	12.551	12.942	12.8963	12.863	12.7672
sp|Q06265|EXOS9_HUMAN	Q06265	NA	NA	NA	NA	10.5862	11.1009	10.7242	10.717	11.5102	11.6467	11.006	11.7794	11.4008	12.2337	12.4863	12.2919
sp|Q06278|AOXA_HUMAN	Q06278	NA	NA	NA	NA	11.5476	10.2633	11.0413	11.6265	NA	9.94731	NA	NA	NA	NA	NA	NA
sp|Q06323|PSME1_HUMAN	Q06323	8.92735	10.7737	9.47575	NA	14.3861	14.2266	14.1249	14.1226	13.5642	13.9246	13.7402	13.6123	12.6885	12.8584	12.8388	12.8969
sp|Q06787|FMR1_HUMAN	Q06787	NA	NA	8.13102	NA	NA	NA	NA	NA	NA	NA	NA	NA	11.5437	11.9144	11.575	NA
sp|Q06830|PRDX1_HUMAN	Q06830	11.5448	11.4201	11.4029	11.1407	14.1868	14.3612	14.2248	14.241	15.0074	14.8157	14.7843	15.0431	15.2656	15.1159	14.9664	14.9615
sp|Q07020|RL18_HUMAN	Q07020	15.377	15.6852	15.345	15.1958	16.7328	16.8233	16.8272	16.8505	16.7706	16.6516	16.4451	16.3557	16.4443	16.386	16.2199	16.2608
sp|Q07021|C1QBP_HUMAN	Q07021	10.6626	10.8566	10.7038	10.7362	13.0352	13.1803	12.8051	13.0316	13.4352	13.832	13.5869	13.9042	14.1043	14.3003	14.2236	14.1057
sp|Q07065|CKAP4_HUMAN	Q07065	13.5876	13.5691	13.5096	13.5162	14.8948	14.9272	14.9829	14.9326	15.2986	15.1832	15.1988	15.4213	12.8126	12.4663	12.5732	12.4153
sp|Q07092|COGA1_HUMAN	Q07092	11.6653	11.4638	11.8564	12.0436	11.364	11.929	10.9845	10.1587	11.2285	11.9435	12.0356	12.2193	NA	NA	NA	NA
sp|Q07157|ZO1_HUMAN	Q07157	9.00205	9.1344	8.68919	NA	12.6538	12.727	12.8679	12.7464	11.8411	11.7867	11.618	11.8466	10.9579	10.189	10.6727	10.2284
sp|Q07666|KHDR1_HUMAN	Q07666	11.5066	NA	10.3252	NA	11.7032	11.6318	11.7602	12.1138	14.0893	13.9059	13.7741	13.6129	14.1882	14.092	14.1169	14.0757
sp|Q07812|BAX_HUMAN	Q07812	NA	NA	10.7168	NA	12.8136	12.7984	12.6948	12.4914	13.6775	13.5756	13.4977	13.4641	12.4239	12.415	12.6493	12.4197
sp|Q07866|KLC1_HUMAN	Q07866	10.8762	10.7371	11.0063	10.8433	13.7301	13.7693	13.7386	13.8024	13.1977	13.3556	13.1578	13.1385	13.4224	13.3242	13.1758	13.0788
sp|Q07954|LRP1_HUMAN	Q07954	9.54823	9.87707	9.65091	9.86057	13.4488	13.403	13.713	13.466	13.8459	13.7789	13.8019	13.7577	13.345	13.1641	13.1522	12.8199
sp|Q07955|SRSF1_HUMAN	Q07955	10.6434	10.7328	11.2536	10.7181	13.1962	13.3428	13.4425	13.4608	14.519	14.6163	14.4566	14.4269	14.3548	14.3172	14.4212	14.2863
sp|Q07960|RHG01_HUMAN	Q07960	10.6441	11.2014	11.2603	11.0105	13.5362	13.5384	13.6607	13.6654	12.8759	12.8403	12.844	12.9673	12.8898	12.7476	12.8854	12.7097
sp|Q08170|SRSF4_HUMAN	Q08170	NA	NA	NA	NA	11.1002	NA	11.3933	11.255	11.1624	12.4501	12.3096	11.5451	11.1729	11.5913	12.0632	12.052
sp|Q08209|PP2BA_HUMAN	Q08209	NA	NA	NA	NA	NA	12.4534	NA	NA	13.4611	13.6923	13.7008	NA	NA	NA	NA	NA
sp|Q08211|DHX9_HUMAN	Q08211	10.57	10.7303	10.9521	10.3959	12.2381	12.3939	12.053	12.1304	12.9292	13.0842	12.7513	12.6335	13.473	13.2183	13.3449	13.2894
sp|Q08257|QOR_HUMAN	Q08257	NA	NA	NA	NA	11.7564	11.839	12.1213	12.3312	12.8737	12.8004	12.569	12.655	13.3938	13.5693	13.2323	13.4475
sp|Q08378|GOGA3_HUMAN	Q08378	10.1541	NA	9.76038	9.75099	11.9552	11.9787	12.0523	11.3859	11.0486	11.2499	11.4498	11.2679	10.8195	11.0787	10.9138	10.6394
sp|Q08379|GOGA2_HUMAN	Q08379	10.6913	10.5905	9.92183	10.5706	11.5091	11.4784	11.8589	11.5531	11.6543	11.852	11.4672	11.3009	10.5045	10.9913	11.3238	11.1882
sp|Q08380|LG3BP_HUMAN	Q08380	11.8707	11.6573	11.7616	11.8162	13.1864	13.2992	13.5003	13.4645	12.2382	12.5504	12.2175	11.631	13.09	12.8661	12.2984	12.8132
sp|Q08397|LOXL1_HUMAN	Q08397	12.6067	12.5944	12.1425	12.5934	NA	NA	NA	NA	13.2583	12.5911	12.8499	13.0996	NA	NA	NA	NA
sp|Q08426|ECHP_HUMAN	Q08426	NA	NA	NA	NA	NA	NA	NA	NA	11.3529	11.4014	11.3762	11.4296	NA	NA	NA	NA
sp|Q08431|MFGM_HUMAN	Q08431	13.0746	13.4698	13.2747	13.3493	14.2367	14.2405	14.3812	14.3631	12.7031	12.6859	12.6039	12.8931	9.93505	9.733	9.70672	9.7293
sp|Q08722|CD47_HUMAN	Q08722	11.7966	11.7073	10.5863	11.4055	13.5518	13.4347	13.5678	13.6469	14.1096	13.706	13.8941	14.1578	13.5033	13.3359	13.501	13.7133
sp|Q08752|PPID_HUMAN	Q08752	NA	NA	NA	NA	NA	12.2843	12.7786	12.7563	12.8117	NA	12.6354	NA	13.5869	12.988	13.2845	12.783
sp|Q08945|SSRP1_HUMAN	Q08945	NA	NA	NA	NA	10.9546	11.1347	10.9074	11.363	12.3942	12.4913	12.5179	11.9196	12.7937	12.4903	12.517	12.3788
sp|Q08AF3|SLFN5_HUMAN	Q08AF3	NA	NA	NA	NA	NA	11.2922	NA	11.2673	12.3712	12.393	12.3733	12.355	11.8754	11.7698	11.8369	11.7376
sp|Q08AM6|VAC14_HUMAN	Q08AM6	NA	NA	NA	NA	10.7902	10.6417	10.4983	10.8387	10.6916	10.2248	10.6324	10.2273	12.9639	13.0854	13.0036	12.9747
sp|Q08J23|NSUN2_HUMAN	Q08J23	8.39703	9.03395	NA	9.34453	10.3145	10.7764	10.3681	10.7524	10.849	9.94147	10.3957	10.9505	11.1865	11.9008	11.1745	11.7662
sp|Q09028|RBBP4_HUMAN	Q09028	NA	NA	NA	NA	NA	NA	NA	11.475	13.2128	13.1687	12.8288	12.8761	13.4352	13.2551	13.2171	13.0353
sp|Q09161|NCBP1_HUMAN	Q09161	NA	NA	NA	NA	10.3703	10.134	10.2135	10.6772	10.7411	11.5969	11.2502	10.9396	12.3916	12.4759	12.1449	11.9175
sp|Q09666|AHNK_HUMAN	Q09666	11.1637	10.8499	10.8528	10.865	15.1917	15.2248	15.4158	15.3369	14.572	14.3914	14.3891	14.6519	14.3923	14.1091	14.0992	13.9165
sp|Q0VDF9|HSP7E_HUMAN	Q0VDF9	10.4296	NA	NA	10.5846	NA	10.7568	NA	NA	NA	NA	NA	10.5251	9.85613	11.1601	11.3489	11.3706
sp|Q0ZGT2|NEXN_HUMAN	Q0ZGT2	11.0015	11.3844	11.3297	10.3125	11.2258	11.1786	11.0979	11.1494	13.2705	13.192	13.1114	13.1173	10.4085	NA	NA	NA
sp|Q10471|GALT2_HUMAN	Q10471	9.82813	NA	9.97674	9.86295	12.1451	12.0565	12.1782	11.7278	12.322	12.4193	12.087	12.2914	11.7428	11.6844	11.3375	11.0923
sp|Q10472|GALT1_HUMAN	Q10472	11.4742	NA	NA	11.7885	12.6445	12.4723	12.2055	12.4398	12.3946	12.3689	11.9431	NA	11.5065	11.1761	11.5149	11.1312
sp|Q10567|AP1B1_HUMAN	Q10567	NA	NA	8.47058	NA	12.7771	12.6657	12.7841	12.7216	12.2454	12.3391	12.6184	12.7144	12.2383	12.3255	12.3639	12.1511
sp|Q10570|CPSF1_HUMAN	Q10570	NA	NA	NA	NA	13.2844	13.306	13.3525	13.3561	14.0477	13.6413	14.0698	13.5289	14.3272	13.3746	13.8399	13.2899
sp|Q10588|BST1_HUMAN	Q10588	13.7358	13.5506	13.4246	13.5818	13.0484	13.0328	13.3131	12.9581	11.3505	11.2866	11.1157	10.9691	NA	NA	NA	NA
sp|Q10589|BST2_HUMAN	Q10589	13.7188	13.4299	13.353	13.3663	12.9949	13.215	14.8798	15.159	12.1711	NA	11.8278	11.7737	NA	12.154	12.0094	NA
sp|Q10713|MPPA_HUMAN	Q10713	NA	NA	NA	NA	12.3084	12.0689	12.0664	12.1657	11.2413	10.9489	11.9161	11.8692	12.2654	11.5464	11.4937	11.9928
sp|Q12765|SCRN1_HUMAN	Q12765	NA	NA	10.7053	NA	12.4052	11.9457	12.4055	12.306	12.8578	12.9145	12.8657	13.0485	11.9351	12.329	12.5562	12.2505
sp|Q12768|WASC5_HUMAN	Q12768	NA	9.11913	9.10819	NA	11.5228	11.494	11.458	11.328	11.4892	11.559	11.3631	11.2214	11.6944	12.1327	12.1354	12.033
sp|Q12769|NU160_HUMAN	Q12769	NA	8.4267	NA	NA	9.39667	9.02099	9.50867	10.642	10.9018	11.9294	12.1163	11.6899	11.6763	11.9512	11.5299	11.8762
sp|Q12788|TBL3_HUMAN	Q12788	NA	NA	NA	NA	NA	NA	NA	NA	11.8999	12.2434	11.5462	11.2963	12.447	12.1411	12.1666	12.1053
sp|Q12792|TWF1_HUMAN	Q12792	NA	NA	NA	NA	12.152	12.3013	11.7077	12.3451	12.9832	12.7599	12.483	12.6526	13.2384	13.0088	12.9345	12.7664
sp|Q12797|ASPH_HUMAN	Q12797	11.5326	11.6723	11.4028	11.3112	12.9691	13.0147	13.1054	13.055	13.5362	13.7336	13.6158	13.768	12.9739	12.9389	13.0278	12.1014
sp|Q12802|AKP13_HUMAN	Q12802	NA	NA	NA	NA	11.5312	11.4104	11.514	11.3659	10.3249	10.4111	9.03214	NA	9.06769	NA	NA	NA
sp|Q12805|FBLN3_HUMAN	Q12805	NA	NA	NA	NA	NA	NA	NA	NA	12.654	12.5077	12.5251	12.5891	NA	NA	NA	NA
sp|Q12841|FSTL1_HUMAN	Q12841	NA	NA	NA	NA	12.1232	11.8626	11.6742	11.6542	10.6693	12.3037	12.1443	12.4716	NA	9.96679	10.3715	10.117
sp|Q12846|STX4_HUMAN	Q12846	NA	NA	NA	NA	11.1384	11.1444	NA	11.125	10.8491	11.6856	11.1263	11.3871	12.7207	12.5259	11.3701	12.7611
sp|Q12874|SF3A3_HUMAN	Q12874	NA	NA	NA	NA	11.1705	10.8654	11.953	11.3079	13.1061	12.6415	12.8333	12.6807	13.737	13.0274	13.0443	12.9322
sp|Q12884|SEPR_HUMAN	Q12884	NA	NA	NA	NA	12.8523	12.8068	12.9401	12.9798	12.2547	12.5511	12.3569	12.2945	12.4096	12.8121	12.5914	12.7648
sp|Q12888|TP53B_HUMAN	Q12888	10.7613	9.92226	10.6749	10.421	11.3938	11.3703	11.4051	11.4202	12.4949	12.3431	12.3411	12.4382	12.7381	12.396	12.3288	12.1618
sp|Q12904|AIMP1_HUMAN	Q12904	12.1724	12.0094	12.0429	11.7734	12.37	12.7557	12.6386	12.5453	13.1589	12.9616	12.8575	13.0242	13.2678	13.3138	13.1718	13.0268
sp|Q12905|ILF2_HUMAN	Q12905	10.6177	10.5429	10.1185	9.83174	12.371	12.6347	12.6234	12.2412	14.2251	14.2462	14.3317	14.0946	13.8391	13.7684	13.9204	13.6311
sp|Q12906|ILF3_HUMAN	Q12906	9.5079	9.29869	9.77799	10.1658	12.4108	12.427	12.348	12.8733	14.0979	13.9894	14.0559	13.9812	13.4187	13.3386	13.3832	13.1695
sp|Q12907|LMAN2_HUMAN	Q12907	11.6297	10.5633	11.0755	10.4305	13.4567	13.5441	13.5572	13.3834	13.5166	13.7713	13.6642	13.591	13.4742	13.694	13.5217	13.4934
sp|Q12929|EPS8_HUMAN	Q12929	11.7869	11.9506	11.6932	11.4983	12.4429	12.6182	12.6338	12.3031	9.52383	10.4481	10.1744	10.5922	10.6423	10.1965	10.0183	10.3167
sp|Q12931|TRAP1_HUMAN	Q12931	8.63216	8.82414	8.77954	8.68566	12.386	12.6035	12.7022	12.322	12.7713	12.8197	12.4535	12.4967	12.04	12.2525	11.8144	12.2012
sp|Q12965|MYO1E_HUMAN	Q12965	11.1643	11.3755	11.0568	10.6679	10.6685	10.7039	10.5602	10.8511	10.7747	10.5786	10.2187	10.6379	13.0489	12.8117	12.6746	12.6827
sp|Q12979|ABR_HUMAN	Q12979	NA	NA	NA	NA	11.7527	11.5622	11.7839	NA	11.4176	11.8128	NA	NA	13.072	12.9734	13.085	12.8228
sp|Q12981|SEC20_HUMAN	Q12981	NA	NA	NA	NA	11.3526	NA	12.0716	11.9957	10.7858	NA	NA	NA	10.6776	NA	11.6083	11.221
sp|Q12996|CSTF3_HUMAN	Q12996	8.0896	NA	NA	NA	10.4515	10.5305	10.2866	10.3652	11.854	11.4909	11.5316	11.6267	11.7659	11.5471	11.3904	11.4911
sp|Q13011|ECH1_HUMAN	Q13011	9.10666	9.72339	9.72332	9.65356	12.1479	12.092	12.005	11.5312	12.9203	12.7639	12.5345	12.7494	13.3355	13.2593	13.1675	12.7653
sp|Q13015|AF1Q_HUMAN	Q13015	NA	NA	NA	NA	NA	NA	NA	NA	NA	10.5479	NA	NA	10.635	10.7291	11.1274	10.3684
sp|Q13033|STRN3_HUMAN	Q13033	NA	NA	NA	NA	12.7181	12.3705	12.449	12.1421	12.8148	12.8609	12.9389	12.8167	11.7462	11.6158	11.6863	11.6127
sp|Q13043|STK4_HUMAN	Q13043	NA	NA	NA	NA	NA	NA	NA	NA	NA	NA	NA	NA	11.7595	11.8534	11.875	11.5997
sp|Q13045|FLII_HUMAN	Q13045	9.1952	9.13545	8.42493	8.66284	11.1909	11.6222	11.4846	11.3808	12.4813	12.4043	12.3778	12.4289	12.7695	12.5335	12.5863	12.4918
sp|Q13057|COASY_HUMAN	Q13057	NA	NA	9.42362	NA	10.4249	10.6125	11.9747	12.131	11.7914	12.1737	11.7967	11.8915	12.8203	12.7212	12.5313	12.0179
sp|Q13084|RM28_HUMAN	Q13084	9.46359	NA	NA	9.73227	11.6725	10.2302	9.53654	9.55705	11.4259	11.7769	11.8756	11.8713	12.5328	12.865	12.6366	12.6512
sp|Q13085|ACACA_HUMAN	Q13085	NA	9.73247	NA	NA	12.3485	12.3565	12.3234	12.5127	11.8141	11.8165	10.7572	11.5641	10.6739	10.9738	11.2298	10.7936
sp|Q13098|CSN1_HUMAN	Q13098	NA	10.4761	NA	NA	11.9647	12.5592	12.654	12.6219	12.9759	13.0253	12.9965	12.8816	12.6888	12.4415	12.1524	12.113
sp|Q13123|RED_HUMAN	Q13123	NA	9.67018	9.33012	9.36103	9.87817	10.0654	10.0134	10.4008	11.4402	11.574	11.5833	11.2979	12.1862	11.6172	12.2111	11.8657
sp|Q13126|MTAP_HUMAN	Q13126	NA	NA	9.85085	NA	11.4601	11.275	11.23	11.1288	NA	11.8793	11.6807	11.998	NA	NA	NA	NA
sp|Q13131|AAPK1_HUMAN	Q13131	NA	NA	NA	NA	10.8763	11.4138	11.4784	11.2897	12.6976	12.4412	12.2084	11.6129	11.6249	11.8403	11.4941	11.5554
sp|Q13136|LIPA1_HUMAN	Q13136	NA	NA	NA	NA	NA	12.0217	12.6232	12.4414	11.8792	NA	11.6419	NA	12.8867	12.802	12.6952	12.5008
sp|Q13144|EI2BE_HUMAN	Q13144	NA	10.4098	NA	NA	11.9245	12.1825	12.133	11.7949	12.6056	12.6209	12.639	12.0465	12.8338	12.4946	12.2747	12.3146
sp|Q13148|TADBP_HUMAN	Q13148	9.52303	8.50822	9.63472	8.76842	11.8756	11.3788	11.9138	11.5398	12.344	12.4438	12.0333	11.6715	13.0741	12.9405	12.8651	12.9364
sp|Q13151|ROA0_HUMAN	Q13151	9.90889	9.79356	10.3648	10.7841	9.72883	9.79702	11.226	11.3866	12.4139	12.6232	11.1291	12.2554	11.8602	11.7742	12.4525	11.699
sp|Q13155|AIMP2_HUMAN	Q13155	12.2433	11.8186	11.9532	11.993	13.0704	13.0099	13.1303	13.1142	13.2297	13.3933	13.2378	13.2646	13.5377	13.3814	13.4655	13.2753
sp|Q13158|FADD_HUMAN	Q13158	NA	NA	NA	NA	NA	NA	NA	NA	10.082	10.6512	10.1105	NA	11.9062	12.0212	11.5767	11.357
sp|Q13162|PRDX4_HUMAN	Q13162	11.432	11.6403	10.6792	11.2087	13.2682	13.4366	13.3718	13.384	13.3481	13.5585	13.1462	13.4877	12.4148	12.2588	12.5277	12.3151
sp|Q13177|PAK2_HUMAN	Q13177	NA	NA	NA	NA	13.063	12.7697	12.985	12.8608	12.594	12.7485	12.2292	12.3531	13.3149	12.5815	12.6316	12.8611
sp|Q13185|CBX3_HUMAN	Q13185	9.5365	NA	NA	9.97685	10.1386	NA	NA	11.4345	12.4602	12.3194	12.3169	11.2163	12.8655	12.4789	12.2606	12.1955
sp|Q13190|STX5_HUMAN	Q13190	NA	NA	NA	NA	11.9472	12.4781	12.475	12.261	12.3531	12.4207	12.2432	11.6177	12.1138	12.1479	12.1375	12.1241
sp|Q13200|PSMD2_HUMAN	Q13200	10.4552	10.8122	10.6189	10.4404	12.452	12.1496	12.2186	12.1945	12.628	12.8756	12.6806	12.5622	13.5592	13.3857	13.3247	13.2881
sp|Q13217|DNJC3_HUMAN	Q13217	NA	NA	NA	NA	12.588	12.9421	12.5612	12.4845	12.266	NA	NA	NA	NA	11.9813	NA	NA
sp|Q13228|SBP1_HUMAN	Q13228	NA	NA	NA	NA	12.6401	12.5595	12.1709	11.3542	13.4842	13.8253	13.6655	13.7696	11.0941	NA	NA	NA
sp|Q13232|NDK3_HUMAN	Q13232	11.0403	NA	NA	10.752	11.7185	11.5412	11.4853	12.2702	11.0248	11.5658	11.4193	13.0147	NA	12.345	9.41066	10.6901
sp|Q13242|SRSF9_HUMAN	Q13242	NA	NA	NA	NA	11.6038	10.2291	11.536	11.7239	12.0741	12.3541	11.672	10.4984	12.8852	12.7233	12.9341	12.5718
sp|Q13247|SRSF6_HUMAN	Q13247	NA	NA	NA	NA	12.2124	12.1969	12.3388	12.0644	NA	13.098	12.8615	12.1746	11.6789	13.0575	13.074	13.1563
sp|Q13263|TIF1B_HUMAN	Q13263	NA	9.90734	NA	11.3009	13.0568	13.1077	13.1826	13.1125	14.4586	14.2588	14.2817	14.3846	13.8611	13.6842	13.6644	13.7335
sp|Q13277|STX3_HUMAN	Q13277	NA	NA	NA	NA	NA	NA	NA	NA	NA	NA	NA	NA	12.5434	NA	12.0122	11.8371
sp|Q13283|G3BP1_HUMAN	Q13283	10.6231	10.3991	10.2956	10.5214	13.2402	13.3421	13.2503	13.2569	13.4423	13.5255	13.473	13.3634	13.4576	13.4587	13.2652	13.1262
sp|Q13308|PTK7_HUMAN	Q13308	7.9698	8.9497	9.01994	8.51589	11.4348	11.1558	11.0504	11.0235	14.1822	14.1348	14.1128	13.943	10.3966	10.7225	10.4298	10.3977
sp|Q13310|PABP4_HUMAN	Q13310	12.1639	11.6851	10.3704	10.1125	13.1661	13.5467	13.5601	13.4326	14.3908	14.4862	14.2258	14.4143	14.7595	14.4189	14.2995	14.2915
sp|Q13322|GRB10_HUMAN	Q13322	NA	NA	11.1351	NA	NA	NA	NA	NA	NA	NA	NA	NA	11.8939	11.6562	11.5583	11.4609
sp|Q13325|IFIT5_HUMAN	Q13325	NA	NA	NA	NA	11.5567	11.5629	10.6718	11.7753	11.6228	11.6726	11.6441	10.7545	10.5964	10.0674	10.214	9.98108
sp|Q13347|EIF3I_HUMAN	Q13347	11.1817	10.367	10.6951	11.0554	12.7452	12.7803	12.6182	12.6772	13.4391	13.5736	13.146	13.512	13.9098	13.8048	13.8175	13.6376
sp|Q13362|2A5G_HUMAN	Q13362	NA	NA	NA	NA	NA	NA	NA	11.0967	NA	NA	NA	NA	13.1749	12.9285	13.2029	13.0429
sp|Q13363|CTBP1_HUMAN	Q13363	NA	11.5108	NA	NA	NA	NA	10.9213	NA	11.7706	13.0931	13.6331	11.6688	12.5493	12.4204	12.9093	11.8192
sp|Q13367|AP3B2_HUMAN	Q13367	NA	NA	NA	NA	NA	NA	NA	NA	NA	NA	NA	NA	11.7463	11.6145	11.6218	11.4177
sp|Q13405|RM49_HUMAN	Q13405	11.2909	12.682	11.8743	12.1714	11.9741	12.4637	12.2818	12.2065	12.6755	12.5739	12.6113	12.7914	13.0823	12.9207	13.0069	12.8299
sp|Q13409|DC1I2_HUMAN	Q13409	NA	11.5326	10.6693	11.6538	12.9784	13.2023	13.0087	13.1049	12.6593	12.6596	12.4789	13.0762	13.0185	12.9604	13.2664	12.9124
sp|Q13418|ILK_HUMAN	Q13418	11.8951	12.1108	12.0902	11.8154	13.1321	13.42	13.2569	13.2359	12.527	12.9663	12.883	13.0252	13.6543	13.3517	13.4573	13.533
sp|Q13423|NNTM_HUMAN	Q13423	10.7666	10.7241	10.6734	10.5445	12.3105	12.3554	12.3205	12.4206	13.1263	13.3306	13.1443	12.9998	11.1987	11.1891	11.3279	11.1978
sp|Q13425|SNTB2_HUMAN	Q13425	9.81037	NA	NA	10.2185	13.0601	13.1018	13.1145	12.6944	12.8781	12.9196	13.0498	12.6999	13.0847	13.0778	12.7027	12.724
sp|Q13426|XRCC4_HUMAN	Q13426	NA	NA	NA	NA	NA	NA	NA	NA	NA	NA	NA	NA	11.156	10.2882	10.3022	9.8978
sp|Q13427|PPIG_HUMAN	Q13427	NA	NA	NA	NA	12.7071	11.9522	11.8152	12.0809	12.8135	13.1078	13.0329	12.3185	13.4876	13.2836	13.223	13.3163
sp|Q13428|TCOF_HUMAN	Q13428	8.43147	8.72611	8.96137	8.31551	11.1358	11.3568	11.5118	11.3714	11.5235	11.7641	11.7419	11.6366	11.8778	12.2248	12.2473	12.1872
sp|Q13435|SF3B2_HUMAN	Q13435	10.5484	11.0886	10.9112	10.8007	11.7589	12.1625	11.9774	11.8532	12.9872	13.2874	13.1157	13.0141	13.6825	13.6031	13.9016	13.6592
sp|Q13439|GOGA4_HUMAN	Q13439	NA	NA	NA	NA	10.8705	11.0505	11.1706	11.0172	11.2278	11.0308	10.9974	11.6887	11.8284	11.8007	12.0682	11.611
sp|Q13442|HAP28_HUMAN	Q13442	10.8941	NA	NA	NA	12.2208	11.3452	12.0237	11.9656	12.6192	12.5954	12.5129	12.3197	12.8518	12.8215	12.9336	12.7668
sp|Q13443|ADAM9_HUMAN	Q13443	NA	9.4745	9.30506	8.77746	12.1329	12.2802	12.5447	12.4787	12.4313	12.3254	12.1341	12.6452	12.5387	12.2475	12.1174	11.9482
sp|Q13445|TMED1_HUMAN	Q13445	NA	NA	NA	NA	NA	12.3463	NA	12.3075	12.8789	12.9459	13.0063	12.4679	12.3838	12.183	12.4719	12.0396
sp|Q13451|FKBP5_HUMAN	Q13451	9.28307	10.3821	9.30515	9.1263	13.1389	13.3519	13.2534	13.1441	13.5131	13.6971	13.6735	13.4356	9.38012	NA	10.2984	9.89979
sp|Q13459|MYO9B_HUMAN	Q13459	NA	NA	NA	NA	9.67146	9.9244	9.96709	10.2817	11.0229	11.2734	10.827	10.7537	12.0603	12.0492	11.6477	11.8077
sp|Q13464|ROCK1_HUMAN	Q13464	NA	NA	NA	NA	10.1255	11.2684	11.1943	10.9936	11.2132	11.502	10.8554	10.9212	11.2742	10.0984	11.2525	10.8233
sp|Q13488|VPP3_HUMAN	Q13488	13.1803	11.933	12.5523	12.7289	13.176	13.1136	13.5064	13.4816	11.5448	11.902	11.7503	11.8565	11.6446	11.5225	11.6307	10.8997
sp|Q13492|PICAL_HUMAN	Q13492	NA	NA	NA	NA	12.523	12.5331	12.541	12.7075	12.5181	12.3188	12.0206	12.6115	11.4078	11.3739	11.4174	11.2535
sp|Q13501|SQSTM_HUMAN	Q13501	NA	NA	8.68358	NA	12.3717	12.3774	12.3688	12.4123	12.2494	11.8168	12.1996	12.3828	13.0357	12.7748	12.6228	12.3579
sp|Q13505|MTX1_HUMAN	Q13505	NA	NA	NA	NA	NA	12.2188	11.7865	12.0511	11.2469	NA	NA	12.6	13.0906	12.8361	13.0364	13.1217
sp|Q13509|TBB3_HUMAN	Q13509	10.9788	NA	NA	NA	13.307	13.0808	12.8715	13.0546	14.0866	14.2689	14.0031	13.3636	14.986	14.9534	14.8663	14.7972
sp|Q13510|ASAH1_HUMAN	Q13510	9.09926	NA	NA	NA	11.7446	11.4842	11.4108	11.8342	12.2121	11.8795	12.4743	12.4451	12.2158	12.6132	12.3397	12.1712
sp|Q13523|PRP4B_HUMAN	Q13523	NA	NA	NA	NA	11.5668	10.8209	10.9891	11.686	12.3711	10.9265	12.1611	11.5784	11.7678	11.9011	11.7267	12.1358
sp|Q13546|RIPK1_HUMAN	Q13546	NA	NA	NA	NA	10.8913	10.576	11.6204	9.85256	9.88923	9.79493	10.4022	10.451	9.52059	9.82088	9.30604	9.28828
sp|Q13547|HDAC1_HUMAN	Q13547	11.3251	10.7063	10.8281	NA	NA	NA	NA	NA	11.5675	12.4964	12.6357	12.6684	11.1006	12.7542	12.8835	12.5716
sp|Q13555|KCC2G_HUMAN	Q13555	10.4747	NA	NA	NA	NA	NA	11.4608	11.8344	11.8938	NA	NA	11.6994	12.7069	12.3632	12.4131	NA
sp|Q13557|KCC2D_HUMAN	Q13557	11.3278	11.1261	11.1791	11.1639	12.9863	13.0314	13.2136	13.2095	13.8232	13.6817	13.6171	13.5373	13.0474	12.7885	12.3751	12.2447
sp|Q13561|DCTN2_HUMAN	Q13561	10.3227	10.1665	10.4705	10.341	12.6916	12.6388	12.7835	12.6418	13.1124	13.102	12.6882	12.4575	13.0373	12.8286	12.8213	12.6029
sp|Q13564|ULA1_HUMAN	Q13564	8.36406	NA	NA	NA	11.8977	11.3298	11.2385	11.6914	11.2028	10.8888	11.4011	11.4603	11.041	10.9523	10.9723	10.8003
sp|Q13573|SNW1_HUMAN	Q13573	10.6474	NA	11.3648	11.3003	NA	NA	NA	NA	12.5053	12.5211	12.5293	12.1168	12.7239	12.5283	12.925	12.7203
sp|Q13576|IQGA2_HUMAN	Q13576	10.7387	NA	NA	NA	13.1586	13.027	13.0013	13.0786	12.2978	12.5787	12.6022	12.809	13.0552	12.8961	13.0222	12.933
sp|Q13586|STIM1_HUMAN	Q13586	NA	NA	NA	NA	NA	NA	NA	NA	11.8261	11.8035	11.813	NA	11.4218	11.4914	NA	NA
sp|Q13595|TRA2A_HUMAN	Q13595	11.712	NA	NA	NA	12.5044	12.4165	NA	12.3954	10.7511	12.4583	11.2369	NA	11.3789	12.2597	12.0213	12.6292
sp|Q13596|SNX1_HUMAN	Q13596	NA	11.7245	NA	NA	12.9735	13.1568	13.1229	13.0028	13.2898	13.3152	13.1922	13.117	13.0128	12.9064	12.9235	12.7327
sp|Q13601|KRR1_HUMAN	Q13601	NA	9.9999	9.76593	9.61545	NA	NA	NA	NA	11.9442	11.6831	11.7968	11.7566	12.5964	12.4804	12.324	12.2489
sp|Q13616|CUL1_HUMAN	Q13616	NA	10.0721	NA	NA	NA	NA	NA	NA	10.9332	10.7362	10.8687	10.62	11.8513	11.1542	11.1887	10.8736
sp|Q13617|CUL2_HUMAN	Q13617	NA	NA	NA	NA	11.6663	11.6263	11.5596	11.5614	11.6739	11.6948	11.8017	11.419	12.1005	12.0235	11.9636	11.9488
sp|Q13618|CUL3_HUMAN	Q13618	NA	NA	NA	NA	11.5493	11.1174	11.3727	11.0304	11.9552	11.4722	11.8746	11.8063	10.797	11.1697	11.0922	11.2417
sp|Q13619|CUL4A_HUMAN	Q13619	NA	NA	NA	NA	11.2318	10.9162	11.1436	NA	10.8338	11.1549	11.8691	11.3866	12.7479	12.6831	12.2606	11.3102
sp|Q13620|CUL4B_HUMAN	Q13620	8.28499	NA	7.8348	7.89898	10.5459	10.3376	10.4298	10.2746	9.7455	10.5463	9.71132	9.47173	11.2006	10.9613	11.3249	11.212
sp|Q13630|FCL_HUMAN	Q13630	11.1259	NA	NA	NA	12.1756	12.2926	12.4808	11.9106	12.0921	11.5641	11.4027	11.7667	11.6318	11.3754	11.3608	11.2256
sp|Q13636|RAB31_HUMAN	Q13636	10.6988	NA	NA	NA	12.1899	12.356	12.2717	12.1196	11.6162	NA	11.4611	NA	12.2237	NA	12.0759	11.3886
sp|Q13637|RAB32_HUMAN	Q13637	10.8384	NA	NA	10.2551	13.0093	13.0163	13.0691	12.9199	13.0299	12.8845	13.1578	13.0372	13.9427	13.5915	13.7498	13.735
sp|Q13641|TPBG_HUMAN	Q13641	NA	NA	NA	NA	12.1499	11.7241	12.1211	11.7086	11.1511	12.0582	11.6798	11.1029	11.4261	11.9214	11.6482	11.7786
sp|Q13642|FHL1_HUMAN	Q13642	NA	10.7278	NA	8.83038	13.2117	13.3466	13.2327	13.3765	13.5475	13.2895	13.29	13.0759	NA	NA	NA	NA
sp|Q13671|RIN1_HUMAN	Q13671	7.49392	8.20335	NA	9.20263	10.7076	10.6625	10.5827	10.6849	11.2552	10.9859	11.046	10.3816	12.86	12.8641	12.7919	12.4829
sp|Q13685|AAMP_HUMAN	Q13685	NA	NA	NA	NA	NA	NA	NA	NA	NA	NA	NA	NA	12.6855	12.3888	12.3549	12.1062
sp|Q13724|MOGS_HUMAN	Q13724	12.021	11.3087	10.8659	10.7507	12.1712	12.2361	12.4548	11.8706	12.7742	12.8571	12.2283	12.1633	11.9719	11.3987	11.4634	11.2896
sp|Q13740|CD166_HUMAN	Q13740	NA	NA	NA	NA	12.9697	13.0715	12.9113	12.9286	11.8385	12.0905	11.2539	11.3404	11.6424	11.5938	10.7787	11.2866
sp|Q13813|SPTN1_HUMAN	Q13813	9.42964	9.52098	9.48217	9.74908	13.6439	13.5881	13.8202	13.6482	13.334	13.274	13.2269	13.1419	13.4041	13.1861	13.2321	13.0635
sp|Q13838|DX39B_HUMAN	Q13838	NA	NA	NA	NA	13.1605	12.6215	12.6734	12.6103	13.6872	14.0544	14.0478	13.91	12.2241	11.8532	12.2521	11.8611
sp|Q13867|BLMH_HUMAN	Q13867	10.6624	NA	NA	NA	10.8879	11.4491	NA	NA	11.7654	11.7875	11.8574	11.0855	10.4692	NA	NA	NA
sp|Q13884|SNTB1_HUMAN	Q13884	12.4161	12.4003	12.0758	11.6778	13.2434	12.6207	12.7759	12.8721	13.057	13.5398	13.5986	13.2925	13.6504	13.366	13.4739	13.5034
sp|Q13907|IDI1_HUMAN	Q13907	NA	NA	NA	NA	12.9407	13.2818	12.9352	13.1769	11.7203	12.4206	12.2345	12.5908	12.5744	12.6147	12.4157	12.4753
sp|Q13951|PEBB_HUMAN	Q13951	NA	NA	11.4173	NA	NA	NA	NA	NA	13.5795	13.6903	13.9656	NA	13.9864	NA	14.1685	NA
sp|Q13976|KGP1_HUMAN	Q13976	NA	NA	NA	NA	NA	NA	NA	NA	11.2979	11.369	11.8983	11.5749	11.3663	11.4727	11.4274	10.6706
sp|Q14008|CKAP5_HUMAN	Q14008	NA	9.93818	NA	NA	11.666	11.7067	11.6575	11.6549	11.7058	12.2491	11.6055	11.7745	12.3861	12.4224	12.3116	12.211
sp|Q14011|CIRBP_HUMAN	Q14011	11.938	11.3559	11.4608	11.5319	13.3672	13.4605	13.7339	13.6878	14.1143	14.0312	13.9326	13.7244	12.2772	11.493	12.0275	11.0182
sp|Q14012|KCC1A_HUMAN	Q14012	NA	NA	NA	NA	11.7837	11.5566	11.3811	11.5211	12.0901	12.0453	11.7981	11.1526	NA	NA	NA	13.0207
sp|Q14019|COTL1_HUMAN	Q14019	NA	NA	10.2265	NA	14.4827	14.5607	14.2367	14.338	12.7526	13.8521	13.4724	12.7625	12.0724	12.7121	12.1928	12.3748
sp|Q14103|HNRPD_HUMAN	Q14103	10.9711	10.2214	11.5652	11.5102	14.4601	14.5429	14.4686	14.5544	15.8243	16.1301	15.7477	15.0712	15.2966	15.1951	15.0724	14.9962
sp|Q14108|SCRB2_HUMAN	Q14108	10.7371	11.3079	11.7723	9.70972	13.7866	13.8611	13.8365	13.7131	14.3958	14.3713	14.2797	14.0355	12.9118	12.8939	12.9044	12.64
sp|Q14112|NID2_HUMAN	Q14112	16.7273	16.7481	16.4272	16.448	13.1607	13.3067	13.6444	13.3249	13.2849	13.1745	12.9511	13.5028	NA	NA	10.7942	NA
sp|Q14118|DAG1_HUMAN	Q14118	NA	NA	NA	NA	12.4038	12.097	12.3152	12.2272	11.916	12.033	12.1215	11.9302	12.3854	12.2962	12.2465	12.3792
sp|Q14126|DSG2_HUMAN	Q14126	NA	NA	NA	NA	NA	NA	NA	NA	NA	NA	NA	NA	12.3768	12.1105	12.1386	11.6945
sp|Q14137|BOP1_HUMAN	Q14137	NA	NA	NA	NA	NA	NA	NA	NA	NA	NA	NA	NA	10.6255	10.251	NA	10.8317
sp|Q14151|SAFB2_HUMAN	Q14151	NA	NA	NA	NA	NA	NA	NA	NA	11.7379	11.3516	11.7102	11.1239	12.1495	11.7907	12.0399	11.8049
sp|Q14152|EIF3A_HUMAN	Q14152	9.83346	9.861	9.46165	9.4349	13.2524	13.3729	13.2397	13.247	13.2518	13.2425	13.3125	13.0685	13.7708	13.5559	13.5744	13.377
sp|Q14155|ARHG7_HUMAN	Q14155	NA	NA	NA	NA	11.256	11.1639	11.1061	11.143	12.2795	11.9551	11.8536	11.7783	12.5418	12.3818	11.6233	11.9497
sp|Q14157|UBP2L_HUMAN	Q14157	8.94053	8.61399	NA	8.62098	12.7499	12.5521	12.6028	12.7142	12.9512	12.6238	12.8571	12.667	12.4881	12.2004	12.0863	11.3907
sp|Q14160|SCRIB_HUMAN	Q14160	NA	NA	NA	NA	10.9631	9.91591	9.59417	9.83651	10.7998	10.183	10.6501	10.8775	11.7415	11.2422	11.6249	11.5154
sp|Q14161|GIT2_HUMAN	Q14161	NA	NA	NA	NA	11.5378	11.3079	11.2608	10.9663	10.7884	10.8349	10.8766	10.9109	11.8748	11.6397	11.9579	12.0359
sp|Q14165|MLEC_HUMAN	Q14165	9.99947	10.2324	NA	10.4945	12.9498	12.9989	13.225	13.2604	13.1795	13.1698	12.9473	12.9772	13.1887	12.9661	12.8926	13.0322
sp|Q14166|TTL12_HUMAN	Q14166	NA	11.1374	NA	NA	12.663	12.8744	12.7253	12.3926	12.6449	13.1225	12.0975	13.0733	11.554	11.497	11.6105	11.4202
sp|Q14185|DOCK1_HUMAN	Q14185	NA	NA	NA	NA	10.4432	10.4355	10.8989	10.6853	11.1449	11.1122	11.1062	11.3856	10.7132	10.5001	10.4146	10.4053
sp|Q14192|FHL2_HUMAN	Q14192	9.4093	9.85773	9.05744	9.13256	12.5816	12.5344	12.7013	12.4911	13.0442	12.9565	13.0023	12.8439	11.8377	12.0331	12.059	11.3559
sp|Q14195|DPYL3_HUMAN	Q14195	10.418	NA	NA	NA	11.9533	11.7881	12.234	12.0025	11.7464	11.6541	11.5127	11.4988	13.1184	12.9825	12.891	12.3405
sp|Q14197|ICT1_HUMAN	Q14197	11.2037	11.8449	NA	10.9877	11.6549	NA	NA	11.106	12.5747	12.4077	12.5667	12.1318	13.2985	13.0196	12.9585	12.6776
sp|Q14203|DCTN1_HUMAN	Q14203	9.96136	10.3145	10.0504	10.0822	13.0359	13.1469	13.0669	13.3983	12.6113	12.7621	12.7524	12.7004	13.0825	12.668	12.6992	12.5055
sp|Q14204|DYHC1_HUMAN	Q14204	10.6362	10.5956	10.8122	10.5736	13.9727	13.9248	14.0485	13.9822	13.2288	13.1979	13.2086	13.1749	13.7368	13.5765	13.6157	13.4603
sp|Q14232|EI2BA_HUMAN	Q14232	9.98935	NA	9.40368	10.3764	11.3514	10.7561	11.2923	10.7569	11.9468	12.1437	11.9578	11.6314	12.2913	11.8532	12.1381	11.4866
sp|Q14240|IF4A2_HUMAN	Q14240	NA	NA	NA	NA	13.6873	13.9501	13.9	13.8557	13.0242	13.1178	13.3154	12.6011	12.7873	12.6091	13.0057	12.7704
sp|Q14247|SRC8_HUMAN	Q14247	NA	10.2795	NA	NA	13.7454	13.8192	13.7748	13.4098	13.1176	13.1463	13.0142	13.5237	13.9596	14.0203	13.9877	14.0443
sp|Q14254|FLOT2_HUMAN	Q14254	13.5469	13.1527	13.2417	13.4284	12.5354	12.4888	12.6204	12.5726	14.1794	14.1827	14.16	14.4293	13.6266	13.4452	13.5378	13.5341
sp|Q14257|RCN2_HUMAN	Q14257	11.7157	11.5424	11.3704	11.5365	12.3436	12.6138	12.6102	12.4625	12.49	12.8116	12.3458	12.5437	NA	12.1066	11.977	12.2256
sp|Q14258|TRI25_HUMAN	Q14258	NA	NA	NA	NA	11.165	11.2365	11.2969	11.2039	12.5826	12.6662	12.5833	12.7198	12.3531	12.2134	12.2107	12.1933
sp|Q14315|FLNC_HUMAN	Q14315	9.44328	9.13137	9.29544	9.67106	13.3828	13.5417	13.4291	13.4242	13.0329	13.2087	13.1327	13.3006	13.9237	13.8824	13.8449	13.7767
sp|Q14318|FKBP8_HUMAN	Q14318	NA	NA	NA	10.3323	10.7442	10.7244	11.5499	10.8887	NA	NA	NA	10.5989	13.2018	12.9942	12.8415	12.6301
sp|Q14344|GNA13_HUMAN	Q14344	NA	8.73131	8.98309	9.43434	10.9606	10.9719	11.0858	10.4654	10.4421	11.2589	10.861	10.1211	12.1273	12.1923	12.0115	12.1693
sp|Q14376|GALE_HUMAN	Q14376	NA	NA	NA	NA	NA	NA	NA	NA	10.6394	10.8589	10.7543	10.367	12.0225	11.9653	12.0856	11.0337
sp|Q14444|CAPR1_HUMAN	Q14444	10.2903	NA	NA	10.8367	13.343	13.2519	13.3671	13.2645	13.7761	13.8143	13.7292	13.5673	13.7995	13.546	13.701	13.4297
sp|Q14498|RBM39_HUMAN	Q14498	10.1322	10.7226	10.7245	10.2626	NA	11.2562	NA	10.8931	12.7001	12.5307	12.3756	12.3998	13.2698	13.2199	13.0676	12.8205
sp|Q14527|HLTF_HUMAN	Q14527	NA	NA	NA	NA	NA	NA	NA	NA	12.6597	11.575	NA	NA	NA	NA	12.9842	12.5784
sp|Q14554|PDIA5_HUMAN	Q14554	NA	NA	NA	NA	12.4343	12.2514	12.3342	12.4296	12.836	12.6845	12.3905	12.7366	10.8604	11.1371	11.0937	11.0598
sp|Q14558|KPRA_HUMAN	Q14558	NA	10.4092	NA	NA	NA	10.1753	NA	NA	10.6502	10.1588	NA	10.106	12.8946	12.7776	12.4408	12.5683
sp|Q14566|MCM6_HUMAN	Q14566	NA	NA	NA	NA	NA	NA	NA	NA	11.62	11.2137	11.1462	11.0213	13.3729	13.1	13.1569	12.9812
sp|Q14573|ITPR3_HUMAN	Q14573	NA	NA	NA	NA	NA	9.99127	11.3184	10.0778	NA	10.3535	NA	NA	12.5899	12.4479	12.2994	12.3929
sp|Q14643|ITPR1_HUMAN	Q14643	NA	9.3978	NA	NA	9.25521	9.60957	10.1159	NA	10.1553	10.2778	10.2016	9.73982	12.6011	12.6533	12.5466	12.5054
sp|Q14669|TRIPC_HUMAN	Q14669	8.84018	10.1351	NA	9.60479	10.6077	10.1721	10.4332	9.52671	11.44	11.1566	11.2566	10.5677	12.479	12.2583	12.5726	12.4594
sp|Q14671|PUM1_HUMAN	Q14671	NA	NA	NA	NA	11.3164	12.2845	NA	11.6563	NA	NA	NA	NA	12.3237	12.9126	NA	NA
sp|Q14677|EPN4_HUMAN	Q14677	NA	NA	NA	10.8834	11.8758	11.9564	11.5352	11.8235	11.5504	12.1754	11.4003	12.2621	12.2513	12.1412	12.183	11.5691
sp|Q14683|SMC1A_HUMAN	Q14683	13.0071	12.6075	12.8164	12.7672	9.89798	NA	10.5332	10.3008	11.4685	11.6157	11.2086	11.3085	11.7864	11.4977	11.577	11.688
sp|Q14684|RRP1B_HUMAN	Q14684	NA	NA	9.26458	NA	10.3738	NA	10.4562	10.3405	11.1443	11.6938	11.4041	11.1328	12.1311	11.9638	12.1063	12.1533
sp|Q14690|RRP5_HUMAN	Q14690	9.4388	10.3734	NA	9.21342	10.7839	10.5782	10.428	10.647	11.9255	11.9668	11.9177	11.2618	12.5058	12.3301	12.2477	12.0486
sp|Q14692|BMS1_HUMAN	Q14692	9.66294	NA	NA	NA	9.68661	10.019	9.29538	9.26827	10.0017	10.1389	11.1413	11.1965	11.5534	11.1973	11.3392	11.0883
sp|Q14694|UBP10_HUMAN	Q14694	NA	NA	NA	NA	11.6836	11.8455	11.8548	12.1414	12.1361	11.8931	11.0689	11.9713	12.4456	11.7787	11.7617	11.967
sp|Q14696|MESD_HUMAN	Q14696	NA	NA	NA	NA	NA	12.0304	12.0244	12.2092	11.5107	12.0008	12.0751	NA	10.8601	11.7572	12.0249	11.7482
sp|Q14697|GANAB_HUMAN	Q14697	10.7726	11.065	10.7466	11.1696	13.4694	13.4728	13.5169	13.3418	13.5668	13.7673	13.5306	13.1569	13.5903	13.3915	13.4854	13.4006
sp|Q14699|RFTN1_HUMAN	Q14699	NA	11.4446	NA	NA	11.6485	11.8841	11.6979	11.6105	12.9705	12.8616	12.7285	NA	11.7041	10.994	11.23	11.1559
sp|Q14728|MFS10_HUMAN	Q14728	11.8124	11.7095	11.7808	11.838	13.6004	13.3906	13.703	13.6386	14.1263	13.939	13.9821	13.872	14.2062	14.2783	14.251	14.1804
sp|Q14738|2A5D_HUMAN	Q14738	10.4712	11.1489	10.8182	10.0745	12.7935	12.8297	12.3567	12.5709	13.3145	13.1883	12.9543	13.1982	12.7258	12.4404	12.4443	12.5619
sp|Q14739|LBR_HUMAN	Q14739	NA	NA	NA	NA	NA	11.2246	11.0818	NA	13.3605	13.4491	13.005	11.835	12.8396	12.9544	12.7222	12.7547
sp|Q14746|COG2_HUMAN	Q14746	NA	NA	NA	NA	10.8874	11.1923	11.2901	11.5722	NA	NA	NA	NA	NA	NA	NA	NA
sp|Q14764|MVP_HUMAN	Q14764	16.6978	16.6603	16.5406	16.5366	15.3132	15.2804	15.4468	15.3529	14.4275	14.4517	14.3108	14.7301	14.6809	14.3149	14.3908	14.3054
sp|Q14766|LTBP1_HUMAN	Q14766	13.5179	13.6146	13.4896	13.474	11.4446	11.5534	11.8589	11.6717	12.8013	11.9281	11.7344	12.4595	NA	9.13394	NA	NA
sp|Q14767|LTBP2_HUMAN	Q14767	11.0379	10.4004	10.7755	11.292	12.716	12.6524	13.3137	12.9931	11.3806	10.8056	10.4445	11.1898	NA	NA	NA	NA
sp|Q14789|GOGB1_HUMAN	Q14789	9.87661	10.1647	9.52798	9.68041	11.7552	11.8526	12.1096	12.1058	10.9859	10.9888	10.8993	11.5651	11.091	10.8229	10.9353	10.8378
sp|Q14790|CASP8_HUMAN	Q14790	NA	NA	NA	NA	12.2839	NA	NA	NA	NA	NA	NA	NA	13.3455	13.3637	13.384	13.1238
sp|Q14839|CHD4_HUMAN	Q14839	NA	NA	NA	NA	10.8484	10.867	10.5406	10.7133	11.4823	11.5075	12.0055	11.7641	12.2587	12.5663	12.506	12.3415
sp|Q14847|LASP1_HUMAN	Q14847	10.2166	10.6389	9.53514	9.24566	14.2946	14.3931	14.3884	14.2946	15.1191	15.1059	15.0216	14.9359	13.7826	14.0892	14.0682	13.9754
sp|Q14914|PTGR1_HUMAN	Q14914	NA	NA	NA	NA	12.8638	12.8139	12.9394	12.8268	12.7669	12.8953	13.0651	12.9654	12.1212	12.6091	12.048	12.2896
sp|Q14956|GPNMB_HUMAN	Q14956	10.4264	10.5527	10.5958	10.8107	15.7912	15.058	15.7233	15.6602	12.7128	12.941	12.7351	12.1901	16.0195	15.8998	15.9871	16.0528
sp|Q14974|IMB1_HUMAN	Q14974	10.0273	10.223	9.89462	9.88429	13.5478	13.51	13.4837	13.4989	13.9212	13.9768	13.7597	13.4113	14.3617	14.0913	14.0802	14.065
sp|Q14978|NOLC1_HUMAN	Q14978	NA	NA	NA	NA	12.5438	11.855	11.8355	12.2227	12.6577	12.8308	11.7418	11.5229	13.6632	13.0709	13.153	13.3686
sp|Q14980|NUMA1_HUMAN	Q14980	11.4223	11.694	11.4983	11.6836	11.0252	10.9	11.1344	10.9915	12.7507	12.6199	12.4985	12.355	12.7482	12.2952	12.4013	12.1192
sp|Q14C86|GAPD1_HUMAN	Q14C86	NA	NA	NA	NA	9.98025	10.6561	10.5704	10.7735	10.7843	11.0845	10.933	11.1957	10.2375	10.2994	10.1566	10.9579
sp|Q15003|CND2_HUMAN	Q15003	NA	NA	NA	NA	NA	NA	NA	NA	NA	NA	NA	NA	12.9216	12.518	12.5804	11.9657
sp|Q15005|SPCS2_HUMAN	Q15005	11.2171	11.9905	11.6128	11.7518	13.271	12.862	13.1812	13.1436	13.4232	13.7378	13.483	12.6275	12.7991	11.4867	11.6215	11.5223
sp|Q15006|EMC2_HUMAN	Q15006	10.5336	9.7742	9.67074	9.75267	10.7106	NA	10.5469	10.5469	11.8499	11.5753	11.413	11.0985	12.1151	12.0644	12.1904	12.0283
sp|Q15007|FL2D_HUMAN	Q15007	NA	NA	NA	NA	NA	NA	NA	NA	9.97387	9.91719	10.3012	NA	10.5657	10.3639	10.6226	10.3052
sp|Q15008|PSMD6_HUMAN	Q15008	9.70994	9.86809	9.89026	10.3185	11.3316	11.0663	11.0887	10.2714	12.644	11.7268	12.4779	11.5063	12.6464	12.693	12.5544	12.5612
sp|Q15018|ABRX2_HUMAN	Q15018	NA	NA	NA	NA	9.44225	10.0299	10.0345	9.43886	8.96126	8.62881	10.4919	9.62664	10.6576	NA	10.4443	10.2709
sp|Q15019|SEPT2_HUMAN	Q15019	10.7915	9.91519	10.2623	NA	12.9814	12.9735	12.9922	12.901	13.9387	13.9104	13.8546	13.5789	13.1733	13.2476	12.9834	12.9095
sp|Q15020|SART3_HUMAN	Q15020	NA	NA	NA	NA	11.5384	11.3241	11.4502	11.603	12.3248	12.5406	12.4994	11.7675	12.701	12.4747	12.6902	12.3656
sp|Q15021|CND1_HUMAN	Q15021	NA	NA	8.6481	NA	NA	NA	NA	NA	8.4395	7.96328	8.34112	7.84521	11.7679	11.6014	11.3813	11.7014
sp|Q15029|U5S1_HUMAN	Q15029	11.687	11.5032	11.5498	11.0463	11.0687	11.5138	11.3679	11.458	12.7149	12.6391	12.6288	12.2447	13.3509	13.1102	13.1348	12.7493
sp|Q15031|SYLM_HUMAN	Q15031	NA	NA	NA	NA	NA	NA	NA	NA	NA	11.1835	NA	NA	11.8507	11.9769	11.8902	NA
sp|Q15035|TRAM2_HUMAN	Q15035	13.5997	13.8412	13.7478	13.397	14.0586	14.2494	13.8691	13.9792	NA	NA	NA	NA	NA	NA	NA	NA
sp|Q15036|SNX17_HUMAN	Q15036	12.7953	NA	NA	NA	NA	11.3845	13.3094	12.109	12.3742	12.4276	12.3699	13.0005	13.0205	11.9653	NA	11.6942
sp|Q15042|RB3GP_HUMAN	Q15042	NA	NA	10.523	NA	12.083	12.1271	12.0033	11.7775	11.7258	11.3457	11.4066	11.5453	12.2769	12.0374	11.5906	12.0204
sp|Q15043|S39AE_HUMAN	Q15043	NA	NA	NA	NA	NA	NA	NA	NA	NA	NA	11.1573	NA	13.1951	13.1745	12.9017	12.7452
sp|Q15046|SYK_HUMAN	Q15046	8.99932	9.84553	10.3816	8.69311	12.4847	12.3411	12.2334	12.1703	12.7984	12.0782	12.1278	12.1344	12.926	13.3531	13.0201	13.2684
sp|Q15050|RRS1_HUMAN	Q15050	NA	NA	NA	NA	12.0952	12.1087	11.8496	12.2444	12.0733	12.2194	12.2289	11.301	12.8189	12.6438	12.7579	12.4175
sp|Q15052|ARHG6_HUMAN	Q15052	NA	10.5386	NA	NA	11.2359	NA	NA	11.8578	11.4975	NA	11.812	11.683	12.9619	12.9182	12.7738	12.6065
sp|Q15056|IF4H_HUMAN	Q15056	NA	8.7056	10.0911	NA	9.78615	9.80435	9.71085	12.3182	13.6411	13.2675	11.9963	13.3728	14.3508	12.2962	13.9017	14.0144
sp|Q15057|ACAP2_HUMAN	Q15057	NA	NA	NA	NA	11.4968	12.3395	11.9369	12.0439	11.7778	11.2825	11.9386	11.4679	11.1589	11.207	NA	10.9909
sp|Q15061|WDR43_HUMAN	Q15061	NA	NA	NA	NA	10.0307	10.7049	10.8869	NA	11.8872	10.9469	11.5944	11.3642	12.3075	11.6034	10.3941	10.4676
sp|Q15063|POSTN_HUMAN	Q15063	12.5101	12.0976	12.4387	12.5973	NA	NA	NA	NA	10.6303	10.6788	10.8625	10.3211	NA	NA	NA	NA
sp|Q15067|ACOX1_HUMAN	Q15067	NA	NA	NA	NA	NA	11.2634	NA	11.3463	NA	11.595	10.9684	11.1484	NA	NA	NA	NA
sp|Q15070|OXA1L_HUMAN	Q15070	NA	NA	NA	NA	11.7904	12.2528	NA	NA	12.3017	11.8701	11.8241	NA	12.1386	11.9863	11.8335	NA
sp|Q15075|EEA1_HUMAN	Q15075	9.57505	10.8634	NA	NA	13.0132	13.0275	13.277	13.0403	13.0958	12.8549	12.8319	12.9169	12.3949	12.1477	12.1038	12.0377
sp|Q15084|PDIA6_HUMAN	Q15084	10.1957	NA	9.62298	NA	15.1079	15.1059	15.1782	15.1682	15.1747	14.9966	14.9312	15.1213	14.4991	14.2617	14.2223	14.1881
sp|Q15102|PA1B3_HUMAN	Q15102	NA	NA	NA	NA	10.5836	10.5169	10.3864	10.4107	11.9476	12.0959	12.0238	11.4185	13.4827	13.4739	13.4482	13.3667
sp|Q15113|PCOC1_HUMAN	Q15113	NA	NA	NA	NA	10.4967	10.6136	10.8193	10.8054	12.6156	12.5385	12.3037	12.7979	10.645	10.3609	10.1619	NA
sp|Q15118|PDK1_HUMAN	Q15118	NA	NA	NA	NA	NA	NA	NA	NA	NA	NA	NA	NA	NA	12.3266	12.3399	12.467
sp|Q15121|PEA15_HUMAN	Q15121	10.9859	NA	12.0736	NA	14.306	13.2832	13.1988	14.2	12.7577	13.733	12.0128	12.6066	14.1093	13.0444	11.7751	12.8108
sp|Q15125|EBP_HUMAN	Q15125	NA	NA	NA	11.9151	13.7835	14.0594	13.4918	13.5738	NA	NA	NA	NA	NA	14.2538	NA	14.3965
sp|Q15126|PMVK_HUMAN	Q15126	NA	10.3933	NA	NA	10.9807	10.5645	10.597	11.2372	NA	10.7548	10.175	NA	10.7687	11.3466	11.161	11.4816
sp|Q15147|PLCB4_HUMAN	Q15147	11.8869	11.4111	10.6297	11.2449	NA	11.0672	NA	NA	11.1643	NA	NA	NA	NA	NA	NA	NA
sp|Q15149|PLEC_HUMAN	Q15149	12.2345	12.3318	12.2771	12.1675	14.2529	14.2576	14.4246	14.3905	14.8193	14.809	14.6822	14.9219	14.0587	13.8244	13.9015	13.72
sp|Q15165|PON2_HUMAN	Q15165	9.98113	NA	NA	NA	NA	11.2772	NA	NA	10.4491	NA	10.5816	10.5592	NA	10.4446	NA	11.4944
sp|Q15172|2A5A_HUMAN	Q15172	NA	NA	NA	NA	NA	NA	NA	NA	NA	NA	NA	12.4991	NA	12.6946	12.9729	12.6457
sp|Q15181|IPYR_HUMAN	Q15181	10.3566	10.7844	NA	10.6241	13.2006	13.0518	13.0549	13.1864	12.8326	13.149	12.988	12.8397	12.9522	13.0246	12.7552	12.7398
sp|Q15185|TEBP_HUMAN	Q15185	NA	NA	NA	10.8326	12.8314	13.0019	12.5247	12.7598	13.5793	13.4315	13.4964	12.8223	14.1432	13.9875	13.7946	13.8859
sp|Q15208|STK38_HUMAN	Q15208	11.1782	11.0648	10.8018	NA	11.8025	11.8166	12.1354	11.9097	11.136	11.8268	11.0646	11.9425	10.8902	11.5045	NA	11.2365
sp|Q15233|NONO_HUMAN	Q15233	11.515	11.2838	11.0286	11.1228	12.1859	11.9514	12.1481	11.7795	13.5688	13.6002	13.5638	13.5205	14.0054	13.9612	13.7757	13.8553
sp|Q15257|PTPA_HUMAN	Q15257	NA	10.5714	9.78015	11.4919	11.5594	11.4192	12.5323	10.7738	11.8517	12.2915	12.3028	12.622	12.2507	12.6329	12.8575	12.8154
sp|Q15274|NADC_HUMAN	Q15274	NA	NA	NA	NA	11.7105	10.8984	11.9601	11.5914	12.7002	12.7091	12.7109	12.8866	10.9362	10.5988	NA	NA
sp|Q15276|RABE1_HUMAN	Q15276	NA	NA	NA	NA	11.6681	11.5143	11.7486	11.8108	11.7847	11.7656	11.6145	11.256	11.9804	11.6963	12.1692	11.8521
sp|Q15286|RAB35_HUMAN	Q15286	10.4618	10.9436	10.9022	9.60925	12.8948	12.7605	12.8815	11.8642	11.5164	12.4068	11.688	12.3618	12.6663	12.1097	13.0658	12.7461
sp|Q15287|RNPS1_HUMAN	Q15287	11.2947	10.4448	10.7817	10.5762	13.6445	13.4671	13.5056	13.5148	13.7439	13.6386	13.5229	13.3395	13.9692	13.7778	13.8821	13.4478
sp|Q15293|RCN1_HUMAN	Q15293	10.2278	9.62449	NA	10.1638	14.1996	14.1242	14.0436	14.0403	14.4355	14.5073	14.239	14.4779	13.4412	13.5447	13.4742	13.096
sp|Q15334|L2GL1_HUMAN	Q15334	NA	NA	NA	NA	10.5992	10.9363	NA	10.96	NA	10.4881	NA	10.8196	12.6705	12.4578	12.2495	12.341
sp|Q15363|TMED2_HUMAN	Q15363	10.7956	11.2275	11.0718	11.2471	12.9227	12.9627	12.8358	13.1307	13.5146	13.4554	13.3806	12.9862	13.6259	13.61	13.3532	13.2667
sp|Q15365|PCBP1_HUMAN	Q15365	10.6693	10.6687	10.8601	10.3503	13.8577	13.8652	13.9065	13.9202	14.5596	14.5619	14.4377	14.4332	14.7568	14.5823	14.6072	14.4793
sp|Q15366|PCBP2_HUMAN	Q15366	11.3876	10.1211	10.1552	10.1518	12.0943	11.9652	12.2679	12.494	13.3309	13.469	13.3176	12.9248	13.7647	13.7949	13.7881	13.853
sp|Q15369|ELOC_HUMAN	Q15369	10.8645	NA	11.2199	NA	12.919	12.6971	12.8528	12.7835	13.076	13.1638	13.0125	13.0749	12.966	12.9991	12.8815	12.8255
sp|Q15370|ELOB_HUMAN	Q15370	NA	10.5437	NA	NA	13.0562	12.9757	13.4236	13.359	13.0517	13.0571	12.6713	12.7132	12.7998	12.3452	12.2481	11.8895
sp|Q15382|RHEB_HUMAN	Q15382	11.6591	12.7234	12.0927	12.4628	11.8293	12.1794	12.5512	12.6503	12.3765	11.7599	12.1873	12.0497	12.9267	12.6368	12.4452	12.5314
sp|Q15386|UBE3C_HUMAN	Q15386	NA	NA	NA	NA	10.7363	10.5767	10.7767	10.545	11.1482	10.5988	10.5093	10.1312	12.3361	12.2024	11.1835	12.0508
sp|Q15388|TOM20_HUMAN	Q15388	NA	NA	NA	NA	12.1189	12.3176	NA	NA	13.5312	13.0527	13.1078	13.0453	13.9827	13.6297	13.6691	13.515
sp|Q15392|DHC24_HUMAN	Q15392	11.3599	11.6248	11.8366	11.03	13.2857	13.6515	13.2824	13.3709	12.4036	11.9534	12.142	13.3114	12.0922	11.6994	11.1171	NA
sp|Q15393|SF3B3_HUMAN	Q15393	NA	10.7792	NA	NA	11.3737	11.6437	11.293	10.9195	12.6691	12.6856	12.8536	12.7287	13.319	13.0916	13.0752	13.0586
sp|Q15397|PUM3_HUMAN	Q15397	10.5288	NA	NA	NA	10.6041	10.2769	10.4648	NA	11.2187	11.5797	11.3065	11.5507	11.9858	11.6559	11.7758	11.9758
sp|Q15404|RSU1_HUMAN	Q15404	NA	NA	NA	NA	12.4149	11.7088	11.9111	11.8121	11.6842	11.8651	12.1411	11.8145	12.2667	12.1101	12.1905	12.2407
sp|Q15417|CNN3_HUMAN	Q15417	NA	NA	9.0411	NA	13.394	13.3315	13.2274	13.2815	13.71	13.6586	13.5635	13.6781	10.1284	9.40676	9.4792	9.70077
sp|Q15424|SAFB1_HUMAN	Q15424	NA	NA	NA	NA	11.3055	11.3648	10.978	10.8636	12.2197	12.5799	11.6219	12.3206	12.6286	12.0018	12.8616	12.5643
sp|Q15427|SF3B4_HUMAN	Q15427	NA	NA	NA	NA	NA	NA	9.85093	NA	10.8738	11.3907	11.2229	9.93204	12.1167	12.5076	12.2567	12.5671
sp|Q15428|SF3A2_HUMAN	Q15428	10.5765	10.9592	11.0854	NA	11.6471	11.932	12.2297	11.847	12.4704	12.3572	12.386	12.3133	13.0633	12.9215	12.8065	12.8078
sp|Q15435|PP1R7_HUMAN	Q15435	9.55733	10.6478	NA	9.40401	12.6956	12.9286	12.9141	12.8197	12.2085	12.0494	12.1264	11.7136	13.0843	12.9335	13.1059	13.0738
sp|Q15436|SC23A_HUMAN	Q15436	10.5869	10.8499	10.4423	9.27469	12.8163	13.057	13.0295	13.0201	13.4681	13.2068	13.4475	13.4766	11.9571	11.4157	12.0437	11.7803
sp|Q15437|SC23B_HUMAN	Q15437	NA	NA	NA	NA	NA	NA	NA	NA	11.291	10.8491	NA	10.6252	12.9459	12.7307	11.306	11.1933
sp|Q15459|SF3A1_HUMAN	Q15459	10.1357	9.8171	10.1369	9.39342	12.2061	12.1495	12.3458	12.1296	13.3105	13.0134	13.0827	13.1818	13.6119	13.2909	13.1859	13.0012
sp|Q15477|SKIV2_HUMAN	Q15477	NA	NA	NA	NA	11.8965	11.5551	11.2069	11.8333	11.6608	11.3904	11.0693	11.6285	10.6086	NA	9.66802	NA
sp|Q15526|SURF1_HUMAN	Q15526	NA	NA	NA	NA	NA	NA	NA	NA	NA	NA	NA	NA	11.8289	12.258	11.8492	NA
sp|Q15555|MARE2_HUMAN	Q15555	NA	11.0016	10.334	10.4345	11.7201	11.0567	10.9974	11.0427	9.58586	10.8555	11.4449	10.3112	12.8388	12.7105	12.6952	12.7994
sp|Q15582|BGH3_HUMAN	Q15582	14.9964	14.489	14.7263	15.0741	13.0798	13.2235	13.6864	13.3022	14.106	13.9005	13.7715	14.4845	13.7935	13.7224	13.8971	13.7111
sp|Q15628|TRADD_HUMAN	Q15628	NA	10.5757	NA	NA	11.939	11.8289	11.7457	12.1023	11.2081	10.8463	11.4057	11.7374	13.6549	13.5457	13.4822	13.324
sp|Q15629|TRAM1_HUMAN	Q15629	12.5239	12.6537	12.124	12.1047	11.5909	11.7774	11.7596	11.629	12.1732	12.8126	12.4337	12.3956	11.2066	11.16	11.2339	10.482
sp|Q15631|TSN_HUMAN	Q15631	NA	NA	NA	NA	13.0848	12.9585	13.3104	12.993	11.9108	11.9934	12.6429	12.7019	13.3976	12.338	13.3173	13.3564
sp|Q15637|SF01_HUMAN	Q15637	NA	NA	NA	NA	11.4789	11.2533	10.9304	11.3238	11.2502	11.4659	11.7157	12.3321	12.4096	12.5357	12.6397	12.5835
sp|Q15642|CIP4_HUMAN	Q15642	NA	NA	NA	NA	10.9641	10.8257	10.4299	10.9736	11.9424	11.3646	11.7405	11.6231	12.4306	12.4406	12.3557	12.3465
sp|Q15643|TRIPB_HUMAN	Q15643	NA	NA	NA	NA	NA	NA	NA	NA	NA	12.1872	11.6168	NA	12.2566	12.0874	11.8696	NA
sp|Q15645|PCH2_HUMAN	Q15645	NA	NA	NA	NA	10.5437	NA	NA	NA	11.397	10.9257	11.2227	10.8761	12.9339	12.9398	12.932	12.726
sp|Q15654|TRIP6_HUMAN	Q15654	NA	NA	NA	NA	11.3062	11.5098	11.5663	NA	11.297	11.4341	11.6521	11.4043	NA	11.6119	11.7488	NA
sp|Q15691|MARE1_HUMAN	Q15691	NA	NA	9.11696	NA	11.9952	11.787	11.0043	11.7851	12.4825	12.6263	12.3399	12.5281	13.1238	13.061	13.086	12.8431
sp|Q15717|ELAV1_HUMAN	Q15717	11.9884	11.8735	NA	11.7552	12.7693	12.9268	13.0456	12.9161	14.429	14.4373	14.4212	13.1327	14.3576	14.5155	14.6094	14.4738
sp|Q15738|NSDHL_HUMAN	Q15738	10.9035	10.8009	10.5708	NA	13.266	13.0714	13.0034	13.2631	11.7198	12.1041	11.6938	12.0606	12.6741	12.922	13.0391	12.8793
sp|Q15746|MYLK_HUMAN	Q15746	8.82034	8.84107	8.76864	NA	9.25546	NA	9.06984	9.03688	13.7131	13.7249	13.7055	13.6415	11.2869	11.0413	10.8316	10.7493
sp|Q15758|AAAT_HUMAN	Q15758	NA	NA	NA	NA	11.8952	12.2695	12.4435	12.1509	13.3121	13.6756	13.5003	13.2364	12.3793	12.4252	12.7051	12.3944
sp|Q15773|MLF2_HUMAN	Q15773	NA	NA	NA	NA	NA	10.4934	NA	10.6692	10.9207	10.4894	NA	NA	12.6093	12.5732	12.4316	12.1871
sp|Q15785|TOM34_HUMAN	Q15785	9.4514	NA	9.46559	NA	10.751	10.4225	10.3881	10.3507	10.2737	10.4263	10.8991	10.4034	13.8402	13.6489	13.6007	13.6176
sp|Q15800|MSMO1_HUMAN	Q15800	NA	NA	NA	NA	12.405	12.1639	NA	NA	NA	NA	NA	NA	11.411	11.8901	12.0364	12.0176
sp|Q15813|TBCE_HUMAN	Q15813	NA	NA	NA	NA	11.0208	11.5774	10.6717	11.6427	11.8566	11.086	11.0329	NA	12.7069	11.3141	11.4269	12.4198
sp|Q15836|VAMP3_HUMAN	Q15836	NA	NA	NA	NA	12.2516	12.8801	12.836	12.1859	12.6569	11.7991	13.2164	12.7375	14.1622	13.9742	13.8545	13.9241
sp|Q15904|VAS1_HUMAN	Q15904	15.1628	14.3569	14.7159	14.614	15.1366	15.2761	15.3264	15.3451	13.3899	13.8776	13.8776	14.2525	NA	12.3609	12.6201	12.7038
sp|Q15907|RB11B_HUMAN	Q15907	NA	12.0812	11.73	12.0554	13.756	13.5946	13.9508	13.9998	14.08	13.7133	13.7381	13.8558	14.3113	14.065	14.0293	13.4931
sp|Q15942|ZYX_HUMAN	Q15942	8.69807	8.71803	NA	NA	13.1336	13.2739	13.3535	12.758	13.7662	13.507	13.6673	13.3957	12.7694	12.4467	12.448	12.1078
sp|Q16181|SEPT7_HUMAN	Q16181	NA	NA	10.4454	NA	13.0584	13.0046	13.0844	12.9736	13.972	13.8696	13.8121	13.6448	13.4052	13.1416	13.122	13.0257
sp|Q16186|ADRM1_HUMAN	Q16186	10.0634	10.311	10.2585	9.73761	12.5674	12.5207	12.6019	12.7	12.8127	12.604	12.5897	12.653	13.4414	13.2473	13.123	13.0069
sp|Q16204|CCDC6_HUMAN	Q16204	NA	NA	NA	NA	NA	NA	11.0716	NA	12.1699	12.0822	12.2892	12.3447	12.4614	12.4755	12.4155	12.3264
sp|Q16222|UAP1_HUMAN	Q16222	NA	NA	NA	NA	13.008	12.9759	12.9875	12.9208	NA	11.253	10.0749	NA	NA	10.9677	10.6822	10.9074
sp|Q16270|IBP7_HUMAN	Q16270	16.1614	16.3828	16.0569	15.7988	12.8674	12.9686	13.0438	12.931	NA	NA	NA	NA	NA	NA	NA	NA
sp|Q16363|LAMA4_HUMAN	Q16363	15.0655	15.0766	14.9105	14.7364	13.4241	13.4895	13.7315	13.6311	12.9528	12.6519	12.6193	13.1404	NA	NA	9.67065	NA
sp|Q16401|PSMD5_HUMAN	Q16401	9.75638	10.2393	9.28198	9.6529	12.4618	12.3919	12.3447	12.3367	12.916	12.6759	12.3988	12.3562	13.1307	12.6458	12.187	12.4495
sp|Q16531|DDB1_HUMAN	Q16531	9.36619	10.1567	9.49869	9.61923	12.0064	12.2454	12.2187	12.0798	12.211	12.8903	12.5502	12.0923	13.4452	13.2738	13.4116	13.189
sp|Q16540|RM23_HUMAN	Q16540	13.037	13.6798	13.2053	12.8657	13.2647	13.5563	13.624	13.4734	NA	NA	12.873	13.0684	13.6126	13.3888	12.9659	12.8441
sp|Q16543|CDC37_HUMAN	Q16543	NA	NA	NA	NA	13.3568	13.2541	13.2146	13.1943	13.3421	13.3307	13.1927	13.2313	13.6828	13.3635	13.4296	13.2027
sp|Q16555|DPYL2_HUMAN	Q16555	NA	NA	8.99655	8.41927	14.1612	13.9165	14.0075	13.8926	13.482	13.8844	13.9035	13.5277	13.5735	13.3899	13.4158	13.5107
sp|Q16563|SYPL1_HUMAN	Q16563	NA	NA	NA	NA	15.5283	15.346	15.2147	15.1678	NA	15.2856	15.0174	15.2942	16.1414	15.8865	15.9667	15.9256
sp|Q16576|RBBP7_HUMAN	Q16576	NA	NA	NA	NA	NA	11.3379	NA	11.1046	11.6508	11.5496	12.2414	11.4109	13.0775	12.8939	12.1438	12.1164
sp|Q16610|ECM1_HUMAN	Q16610	13.568	13.3609	13.1911	12.9357	10.1115	10.4685	10.2695	10.1545	10.9044	10.8821	10.5972	11.0383	10.0254	10.3499	9.84315	NA
sp|Q16629|SRSF7_HUMAN	Q16629	NA	NA	11.2101	NA	13.4511	13.3807	13.4787	13.5576	14.5347	14.7941	14.6543	14.4113	14.4632	14.6953	14.6735	14.5027
sp|Q16630|CPSF6_HUMAN	Q16630	NA	NA	NA	NA	10.9656	10.5116	11.2891	10.6118	11.9422	11.5326	10.1682	11.38	12.1333	11.4616	11.4421	11.5081
sp|Q16643|DREB_HUMAN	Q16643	9.51606	NA	8.99636	9.35879	13.6455	13.809	13.7086	13.6558	13.2034	13.2013	13.1486	12.9013	10.7769	10.5519	10.6547	11.0211
sp|Q16647|PTGIS_HUMAN	Q16647	NA	NA	NA	NA	11.704	11.6092	11.5184	11.9268	NA	NA	NA	NA	NA	NA	NA	NA
sp|Q16658|FSCN1_HUMAN	Q16658	10.5948	10.7549	11.2423	10.5191	13.6917	13.6443	13.7846	13.7293	13.9756	13.7538	14.1124	13.9106	12.3419	12.186	12.3251	12.1185
sp|Q16666|IF16_HUMAN	Q16666	10.4595	10.5908	10.3521	9.56445	10.7461	10.5599	11.7713	10.8992	13.346	13.2063	13.2567	13.0751	14.0561	13.9026	14.0083	13.7901
sp|Q16678|CP1B1_HUMAN	Q16678	NA	NA	NA	NA	13.9646	13.8205	14.22	13.9168	11.9745	11.5656	11.4561	12.071	13.0457	12.8759	12.6734	12.6667
sp|Q16698|DECR_HUMAN	Q16698	11.0423	11.1098	11.9031	11.5351	13.5394	13.749	13.604	13.6689	13.4565	13.5747	13.6017	13.7959	13.7984	13.4738	13.711	13.7004
sp|Q16706|MA2A1_HUMAN	Q16706	NA	NA	10.2172	NA	12.8477	11.7601	12.7285	12.854	10.5378	11.3272	NA	10.1523	12.0313	11.2983	11.2482	10.0642
sp|Q16718|NDUA5_HUMAN	Q16718	11.8212	11.7963	11.5348	11.719	11.169	12.153	11.9808	11.218	12.8823	11.6992	11.6735	13.2961	13.578	12.7056	13.324	12.6674
sp|Q16719|KYNU_HUMAN	Q16719	NA	NA	NA	NA	NA	NA	NA	9.32886	NA	NA	NA	NA	13.5203	13.471	13.5041	13.4167
sp|Q16740|CLPP_HUMAN	Q16740	NA	NA	NA	NA	NA	NA	12.0296	11.6369	12.3082	12.0792	12.3392	12.1118	12.8609	12.4843	12.7096	12.9269
sp|Q16774|KGUA_HUMAN	Q16774	NA	NA	NA	NA	12.2562	12.1462	11.9651	12.0575	10.653	11.2421	10.8116	10.4584	10.7402	10.2106	9.77004	10.9362
sp|Q16787|LAMA3_HUMAN	Q16787	13.5942	13.499	13.5657	13.0749	11.726	11.7492	11.6062	11.7752	NA	NA	NA	NA	NA	NA	NA	NA
sp|Q16790|CAH9_HUMAN	Q16790	NA	NA	NA	NA	NA	NA	NA	NA	NA	NA	NA	NA	14.0228	13.7233	13.8108	13.655
sp|Q16795|NDUA9_HUMAN	Q16795	12.3816	11.8247	12.4035	12.1297	13.2714	13.142	13.4179	13.2245	13.4854	13.5846	13.4502	13.2464	13.0316	12.8849	12.7503	12.8645
sp|Q16799|RTN1_HUMAN	Q16799	NA	NA	NA	NA	13.9548	13.9632	13.8816	14.0631	NA	13.3983	NA	NA	12.3332	13.7033	14.0471	14.1324
sp|Q16822|PCKGM_HUMAN	Q16822	NA	NA	NA	9.77593	10.4073	10.3442	10.0311	11.0005	12.6318	12.8586	12.6892	12.3408	10.4112	9.75465	9.58384	9.5615
sp|Q16831|UPP1_HUMAN	Q16831	NA	NA	NA	NA	NA	NA	NA	NA	NA	NA	NA	NA	14.0196	14.0598	13.9476	13.9327
sp|Q16832|DDR2_HUMAN	Q16832	NA	NA	NA	NA	12.3209	12.3683	12.413	12.3609	12.0464	12.1913	12.0913	12.1584	10.6188	NA	NA	NA
sp|Q16836|HCDH_HUMAN	Q16836	10.323	10.1278	9.91	10.4836	10.6702	11.925	11.4634	12.1235	11.7865	11.9311	11.4691	11.5684	12.5266	12.5983	12.2666	12.1637
sp|Q16850|CP51A_HUMAN	Q16850	NA	NA	NA	NA	12.3508	12.0021	12.3928	12.1957	11.3568	11.3421	11.264	11.7528	11.3271	11.0095	NA	10.7254
sp|Q16851|UGPA_HUMAN	Q16851	NA	NA	NA	NA	13.5727	13.548	13.6254	13.6154	12.3405	12.4312	12.539	12.0892	12.2126	12.084	12.054	11.8725
sp|Q16864|VATF_HUMAN	Q16864	NA	NA	NA	NA	10.7191	9.85564	NA	9.70254	10.1534	9.48616	11.0162	10.3773	11.0824	11.215	11.0232	11.3309
sp|Q16877|F264_HUMAN	Q16877	NA	NA	NA	NA	NA	NA	NA	NA	NA	NA	11.3882	NA	12.4155	12.0929	12.3047	12.3865
sp|Q16881|TRXR1_HUMAN	Q16881	NA	NA	10.979	NA	13.1599	13.1659	13.1119	13.0437	13.7806	13.7015	13.3245	13.4499	12.6017	12.4829	12.2012	12.3203
sp|Q16891|MIC60_HUMAN	Q16891	14.3491	14.4281	14.3317	14.2218	13.1604	13.1585	13.4433	13.1428	13.7502	13.8472	13.7466	13.9179	14.4944	14.3378	14.2954	14.1796
sp|Q1KMD3|HNRL2_HUMAN	Q1KMD3	11.8797	12.0533	11.6719	11.798	12.5033	12.7017	12.4936	12.5571	13.6243	13.5828	13.4752	13.3595	14.0717	14.0453	13.9305	13.7395
sp|Q27J81|INF2_HUMAN	Q27J81	8.90148	8.76874	9.43582	8.4085	12.4879	12.3124	12.3898	12.3342	10.7229	10.9738	10.5169	10.3289	11.8806	11.9133	12.0264	11.4208
sp|Q2M2I8|AAK1_HUMAN	Q2M2I8	NA	NA	NA	NA	11.1012	10.9241	11.247	11.2599	11.5278	10.8577	10.8881	11.5316	12.2685	12.0932	12.199	11.9018
sp|Q2M389|WASC4_HUMAN	Q2M389	NA	NA	NA	NA	11.5507	11.5941	11.7279	11.0548	10.6193	10.8554	11.0295	11.021	12.193	12.1592	11.9725	11.8436
sp|Q2NL82|TSR1_HUMAN	Q2NL82	NA	NA	NA	NA	11.6475	NA	NA	NA	12.0887	12.2328	12.0218	NA	12.8537	12.8982	12.5511	12.5022
sp|Q2TAA2|IAH1_HUMAN	Q2TAA2	NA	NA	NA	NA	NA	NA	NA	NA	11.966	11.267	11.7469	11.2502	11.5145	11.2939	11.213	NA
sp|Q2TAY7|SMU1_HUMAN	Q2TAY7	NA	NA	NA	NA	12.858	12.6801	12.7397	12.8347	13.8909	13.912	13.902	13.4768	14.2715	NA	13.9687	14.049
sp|Q2VPB7|AP5B1_HUMAN	Q2VPB7	NA	NA	NA	NA	10.0319	NA	NA	9.16482	NA	NA	9.58832	NA	10.5929	10.7967	10.6647	10.9487
sp|Q32MZ4|LRRF1_HUMAN	Q32MZ4	9.66385	9.07171	9.28899	NA	10.5682	9.39016	10.683	10.1124	11.8906	12.134	11.6951	11.2431	13.1821	12.7152	12.9609	12.7321
sp|Q32P28|P3H1_HUMAN	Q32P28	11.6795	11.0932	11.6046	11.3585	12.7231	11.9916	12.4476	12.8362	13.969	13.7552	13.8258	13.8515	12.2331	11.6994	11.8769	11.9783
sp|Q32P44|EMAL3_HUMAN	Q32P44	NA	10.3876	10.3088	NA	11.9174	11.9185	12.4398	12.4259	10.8799	10.6681	11.8221	11.5467	12.8887	12.5576	12.6239	12.5401
sp|Q3KQU3|MA7D1_HUMAN	Q3KQU3	10.097	10.6392	10.6562	10.5752	13.2014	13.364	13.5019	13.431	12.8624	12.6961	12.6703	12.8659	13.1262	12.9569	12.9043	12.7956
sp|Q3KQV9|UAP1L_HUMAN	Q3KQV9	NA	NA	NA	9.23939	11.5117	10.9737	8.90756	8.91105	9.22638	9.21739	8.93766	9.24125	13.1788	12.3109	12.4149	11.365
sp|Q3LXA3|TKFC_HUMAN	Q3LXA3	NA	NA	NA	NA	9.98132	9.4638	9.80364	9.99624	10.2187	10.0785	10.7299	9.96134	11.8015	11.1381	11.5244	11.3538
sp|Q3MHD2|LSM12_HUMAN	Q3MHD2	NA	NA	NA	NA	12.3412	11.9809	NA	NA	12.6677	12.659	12.7276	12.4835	12.7632	12.7335	12.8661	12.4607
sp|Q3SXM5|HSDL1_HUMAN	Q3SXM5	NA	NA	NA	NA	10.9274	10.5639	10.4956	10.5954	NA	10.3556	10.1528	10.8201	11.9933	12.0615	11.8429	12.0588
sp|Q3SY69|AL1L2_HUMAN	Q3SY69	NA	NA	9.56203	NA	11.8477	11.7894	11.7861	11.9253	13.6282	13.5673	13.5692	13.5238	NA	9.3237	10.0293	9.88639
sp|Q3V6T2|GRDN_HUMAN	Q3V6T2	NA	NA	NA	NA	NA	NA	11.0024	NA	NA	NA	NA	10.333	10.7207	10.5433	10.3775	10.5729
sp|Q3YEC7|RABL6_HUMAN	Q3YEC7	NA	NA	NA	NA	NA	10.9939	NA	NA	NA	NA	10.7423	11.6309	NA	NA	NA	NA
sp|Q3ZCQ8|TIM50_HUMAN	Q3ZCQ8	NA	NA	9.11926	8.3484	10.3604	10.2534	10.2932	10.488	10.2739	10.3945	10.7457	11.4216	12.1568	12.2083	12.3397	12.528
sp|Q460N5|PAR14_HUMAN	Q460N5	NA	NA	NA	NA	11.7529	11.8046	12.1899	11.922	NA	NA	NA	NA	11.2613	NA	10.983	NA
sp|Q49A26|GLYR1_HUMAN	Q49A26	NA	14.3449	13.5972	NA	NA	NA	NA	NA	NA	NA	NA	NA	NA	12.6968	12.671	NA
sp|Q4G0F5|VP26B_HUMAN	Q4G0F5	NA	11.1032	NA	NA	11.709	10.7575	11.9626	NA	12.0198	10.7598	10.8692	12.179	10.7247	NA	10.2812	10.7215
sp|Q4G0J3|LARP7_HUMAN	Q4G0J3	NA	NA	NA	NA	9.50151	10.1952	9.9164	9.9149	10.8138	10.5382	11.0354	10.624	10.9066	10.7168	11.0049	10.935
sp|Q4G148|GXLT1_HUMAN	Q4G148	NA	NA	NA	NA	12.4731	12.2593	12.3581	12.2832	12.8255	12.5279	12.4267	12.4814	13.7836	13.5496	13.1671	13.4005
sp|Q4KMQ2|ANO6_HUMAN	Q4KMQ2	NA	NA	NA	NA	NA	NA	NA	NA	11.5632	11.4547	11.3777	11.3104	12.0597	11.9629	11.839	11.4517
sp|Q4V328|GRAP1_HUMAN	Q4V328	NA	NA	NA	NA	11.7775	11.8367	NA	11.0718	NA	10.793	11.3311	11.0059	11.31	10.9778	11.2791	11.0973
sp|Q52LJ0|FA98B_HUMAN	Q52LJ0	NA	NA	9.99744	10.1565	10.5055	11.0913	NA	10.2409	12.025	12.3476	12.0134	11.8676	12.0917	12.1538	11.438	11.2026
sp|Q52LW3|RHG29_HUMAN	Q52LW3	NA	NA	NA	NA	11.5015	11.457	11.5262	11.5023	NA	NA	NA	NA	NA	NA	NA	NA
sp|Q53EL6|PDCD4_HUMAN	Q53EL6	10.121	NA	10.6082	NA	12.2562	12.087	12.6062	12.2082	11.3505	11.3932	10.4757	11.7974	11.9816	12.0662	12.2739	11.8505
sp|Q53EP0|FND3B_HUMAN	Q53EP0	NA	NA	NA	NA	10.6013	NA	9.66331	10.9336	12.0095	11.7933	11.7782	11.3111	11.2852	NA	10.1212	11.1636
sp|Q53FA7|QORX_HUMAN	Q53FA7	NA	NA	NA	NA	12.5455	12.38	12.7365	NA	13.5737	13.6557	12.9508	13.4285	NA	NA	NA	NA
sp|Q53FT3|HIKES_HUMAN	Q53FT3	10.3527	NA	NA	NA	10.817	11.4387	11.7947	11.1498	12.4235	12.1512	12.1793	11.3823	NA	NA	NA	10.3265
sp|Q53GQ0|DHB12_HUMAN	Q53GQ0	10.6535	10.9392	10.2505	11.2247	13.3975	13.2649	13.2821	13.073	11.9393	12.1718	12.3424	12.6061	13.0186	12.6779	12.6516	12.7549
sp|Q53GS9|SNUT2_HUMAN	Q53GS9	NA	NA	NA	NA	10.5923	10.4902	10.5314	10.4984	11.9042	11.5825	11.287	11.6154	12.3722	12.1875	12.1161	11.9808
sp|Q53H12|AGK_HUMAN	Q53H12	10.9753	10.8196	11.1238	10.8731	12.8636	12.7741	12.869	12.8324	12.8726	12.9295	12.6479	12.8226	13.7102	13.4758	13.4989	13.447
sp|Q53H82|LACB2_HUMAN	Q53H82	NA	NA	NA	NA	12.0356	11.8866	12.0651	11.8676	12.7549	12.5991	12.6691	12.8299	NA	12.5947	11.9793	NA
sp|Q53H96|P5CR3_HUMAN	Q53H96	12.167	13.1042	12.8723	12.3446	11.3982	12.2256	12.1123	11.6367	11.864	11.8017	11.9147	12.01	12.0699	11.9746	11.7967	11.8499
sp|Q53T59|H1BP3_HUMAN	Q53T59	NA	NA	NA	NA	11.525	11.3381	12.296	12.3197	10.81	10.8124	10.775	11.4769	NA	10.9661	10.7027	11.4163
sp|Q53TN4|CYBR1_HUMAN	Q53TN4	NA	NA	10.8334	10.3402	11.9702	11.2007	12.3822	12.1139	12.4289	12.4541	12.5459	12.4841	11.7054	11.8006	11.9276	11.6652
sp|Q562E7|WDR81_HUMAN	Q562E7	NA	NA	NA	NA	NA	NA	10.0627	NA	10.2492	9.88161	NA	NA	10.543	9.74998	9.98693	NA
sp|Q562R1|ACTBL_HUMAN	Q562R1	15.8229	14.6942	14.7701	15.3561	18.6499	18.4736	18.5967	18.6779	19.1478	19.1249	18.7278	18.4812	18.47	18.528	18.2407	17.827
sp|Q567U6|CCD93_HUMAN	Q567U6	NA	NA	NA	NA	11.2026	10.935	10.5844	10.6528	10.8663	10.6725	10.7395	10.5864	12.033	11.9596	10.8218	11.7058
sp|Q56VL3|OCAD2_HUMAN	Q56VL3	NA	NA	NA	8.21792	9.48946	9.2596	9.42212	9.50285	9.11585	9.40997	NA	9.99935	14.7785	14.6064	14.6589	14.5615
sp|Q5EB52|MEST_HUMAN	Q5EB52	10.5544	NA	NA	NA	12.8878	12.2576	12.6834	12.6988	11.0883	11.7106	10.3128	10.9518	11.6839	11.7715	11.6328	10.9991
sp|Q5GLZ8|HERC4_HUMAN	Q5GLZ8	NA	NA	NA	NA	11.1618	NA	11.7148	NA	NA	NA	11.2909	NA	11.2105	11.3409	11.8216	11.9143
sp|Q5H9R7|PP6R3_HUMAN	Q5H9R7	NA	NA	NA	NA	NA	NA	NA	NA	10.1023	10.8979	NA	10.0623	10.4266	10.5565	11.1642	11.4845
sp|Q5HYI7|MTX3_HUMAN	Q5HYI7	NA	NA	12.2026	NA	NA	NA	NA	NA	NA	NA	NA	12.2076	NA	NA	NA	12.8327
sp|Q5HYI8|RABL3_HUMAN	Q5HYI8	NA	NA	NA	NA	NA	NA	NA	NA	NA	NA	12.3186	NA	12.9639	13.2144	12.2934	13.1499
sp|Q5J8M3|EMC4_HUMAN	Q5J8M3	NA	NA	NA	NA	12.5861	NA	NA	NA	NA	12.3531	NA	12.219	NA	13.6103	12.9091	13.1686
sp|Q5JRA6|TGO1_HUMAN	Q5JRA6	NA	NA	9.0633	NA	11.4603	11.6317	11.7941	11.4726	10.0035	11.266	11.1069	11.0612	10.6095	10.8447	9.99368	10.9361
sp|Q5JRX3|PREP_HUMAN	Q5JRX3	9.70445	NA	NA	NA	12.2786	12.1478	12.3	12.3574	11.602	11.1971	11.3306	11.1766	11.0916	10.8718	10.9048	10.8604
sp|Q5JTH9|RRP12_HUMAN	Q5JTH9	NA	NA	8.9483	NA	10.0121	10.6727	10.5574	10.7471	11.0764	11.2941	11.1258	10.8507	11.9283	11.9319	11.9202	11.9443
sp|Q5JTV8|TOIP1_HUMAN	Q5JTV8	10.9853	11.394	11.0333	11.1806	12.4563	12.3325	11.5111	11.7082	13.5335	13.6149	13.3451	13.1206	12.9384	12.6835	12.7644	12.5566
sp|Q5JVF3|PCID2_HUMAN	Q5JVF3	NA	NA	NA	NA	10.3209	NA	10.405	NA	10.5762	10.864	11.2986	10.8492	12.6939	12.7853	12.1882	12.5866
sp|Q5JWF2|GNAS1_HUMAN	Q5JWF2	10.8572	11.6122	11.319	11.4814	12.9002	12.7919	12.8499	12.8342	12.6155	13.0722	12.2071	12.7841	12.2344	11.6285	11.2255	12.38
sp|Q5K4L6|S27A3_HUMAN	Q5K4L6	NA	NA	NA	NA	NA	NA	NA	NA	11.6398	NA	NA	NA	12.3766	13.0219	13.1752	NA
sp|Q5M775|CYTSB_HUMAN	Q5M775	NA	NA	NA	NA	NA	NA	NA	NA	9.3966	NA	NA	NA	9.99193	10.5935	10.3826	NA
sp|Q5QJE6|TDIF2_HUMAN	Q5QJE6	NA	NA	11.1431	11.3484	NA	NA	NA	NA	11.8045	10.913	11.1851	10.8139	11.7414	11.3083	11.0302	11.1766
sp|Q5R3I4|TTC38_HUMAN	Q5R3I4	9.45513	8.43273	NA	NA	12.0287	12.3445	12.1651	12.5004	12.6924	12.7245	12.7298	12.0886	NA	10.8467	10.9579	11.0794
sp|Q5RI15|COX20_HUMAN	Q5RI15	NA	NA	NA	NA	NA	NA	NA	NA	11.9296	12.7312	NA	NA	14.0372	14.0184	13.9858	13.4382
sp|Q5RKV6|EXOS6_HUMAN	Q5RKV6	NA	NA	NA	NA	9.72385	10.1316	9.91323	9.66502	10.5554	10.6349	11.0985	10.7922	11.6015	11.3856	12.3746	11.8932
sp|Q5SNT2|TM201_HUMAN	Q5SNT2	12.7071	12.9004	12.7157	12.8148	NA	12.1359	12.2054	12.2871	13.4436	13.2917	13.291	13.1993	13.8501	13.7051	13.5226	13.5567
sp|Q5SRE5|NU188_HUMAN	Q5SRE5	NA	NA	NA	NA	11.2507	11.0756	11.3928	NA	11.9215	11.819	11.5728	11.7163	11.8153	12.1017	NA	11.6586
sp|Q5SSJ5|HP1B3_HUMAN	Q5SSJ5	13.7539	13.7048	13.7053	13.5385	13.6558	13.8497	13.8562	13.8254	15.0253	14.9594	14.975	14.9409	14.4986	14.1954	14.1778	14.1337
sp|Q5SW79|CE170_HUMAN	Q5SW79	NA	10.0806	NA	NA	11.744	11.8875	11.6288	11.5823	10.7978	11.4624	10.9336	10.3152	11.8762	12.062	12.3953	12.2769
sp|Q5SW96|ARH_HUMAN	Q5SW96	NA	NA	NA	NA	NA	NA	NA	NA	NA	NA	10.2978	10.7007	11.713	11.9361	11.5329	11.662
sp|Q5SY16|NOL9_HUMAN	Q5SY16	NA	NA	NA	NA	NA	NA	NA	NA	NA	NA	NA	NA	11.0264	NA	10.9227	11.3043
sp|Q5T160|SYRM_HUMAN	Q5T160	NA	NA	NA	NA	10.9069	10.9955	10.8189	11.5069	11.5566	11.113	11.6858	10.8719	12.1426	12.424	12.4424	12.5513
sp|Q5T1M5|FKB15_HUMAN	Q5T1M5	NA	NA	NA	NA	11.3731	11.5863	NA	10.9417	11.1711	11.0201	10.9791	NA	12.513	11.9988	11.8055	11.8323
sp|Q5T447|HECD3_HUMAN	Q5T447	NA	NA	NA	NA	NA	NA	10.4062	11.3309	NA	NA	NA	10.3983	11.9284	11.6483	11.585	11.6239
sp|Q5T4S7|UBR4_HUMAN	Q5T4S7	NA	8.0599	NA	9.15461	11.5192	11.4882	11.1238	11.2634	11.0252	11.4381	10.9536	11.0056	11.9014	11.953	11.7516	11.7784
sp|Q5T5C0|STXB5_HUMAN	Q5T5C0	NA	NA	NA	NA	12.1707	12.3691	12.1252	12.2258	NA	NA	NA	NA	NA	NA	NA	NA
sp|Q5T5P2|SKT_HUMAN	Q5T5P2	NA	NA	NA	NA	NA	NA	NA	NA	NA	10.6362	NA	10.8077	12.3174	11.9706	12.2539	11.902
sp|Q5T6F2|UBAP2_HUMAN	Q5T6F2	NA	NA	NA	NA	NA	9.29293	9.28434	9.76322	9.66499	NA	9.1152	9.29064	9.72453	9.32924	9.28009	NA
sp|Q5T6V5|QSPP_HUMAN	Q5T6V5	NA	NA	NA	NA	NA	11.0888	11.0066	11.0302	12.0163	11.5384	12.0732	11.259	12.562	12.5084	11.7456	12.313
sp|Q5T8D3|ACBD5_HUMAN	Q5T8D3	NA	NA	NA	NA	11.0016	11.1372	NA	NA	NA	NA	NA	11.2292	NA	NA	NA	NA
sp|Q5T8P6|RBM26_HUMAN	Q5T8P6	NA	NA	NA	NA	10.1058	9.89239	NA	10.0488	10.6988	10.7769	10.5661	10.293	11.9231	11.6075	11.543	11.0796
sp|Q5T9L3|WLS_HUMAN	Q5T9L3	NA	NA	NA	10.1502	12.6336	12.6338	12.6933	12.6881	12.2436	12.2464	11.9327	11.8502	12.7327	12.8996	12.5714	12.523
sp|Q5TCZ1|SPD2A_HUMAN	Q5TCZ1	NA	NA	NA	NA	NA	11.0547	10.8349	NA	NA	NA	9.76765	11.6266	NA	NA	NA	NA
sp|Q5TDH0|DDI2_HUMAN	Q5TDH0	NA	NA	NA	NA	NA	NA	NA	NA	12.1804	12.6861	NA	NA	11.9144	NA	NA	NA
sp|Q5TEC6|H37_HUMAN	Q5TEC6	17.3369	16.9989	17.2745	17.2627	14.4173	14.7572	14.9909	14.9343	15.2783	15.4178	15.2692	15.3905	15.5552	15.5255	15.4713	15.5752
sp|Q5TEJ8|THMS2_HUMAN	Q5TEJ8	NA	NA	NA	NA	NA	NA	NA	NA	NA	NA	NA	NA	NA	12.612	12.5923	12.7117
sp|Q5TFE4|NT5D1_HUMAN	Q5TFE4	NA	NA	NA	NA	NA	NA	NA	NA	NA	NA	NA	NA	10.938	11.4294	11.2857	10.9636
sp|Q5TGZ0|MIC10_HUMAN	Q5TGZ0	12.059	12.3934	NA	NA	NA	NA	NA	NA	12.8178	12.8029	12.6884	NA	13.8758	13.6079	13.2334	12.9648
sp|Q5UIP0|RIF1_HUMAN	Q5UIP0	8.8459	9.36049	10.3965	10.3134	7.96811	NA	NA	NA	NA	NA	8.45157	NA	9.21869	9.01122	9.82949	9.4411
sp|Q5VIR6|VPS53_HUMAN	Q5VIR6	NA	NA	10.6816	NA	10.346	10.5026	11.5183	11.102	10.4944	10.917	10.2231	11.1232	11.9784	10.4403	11.2748	11.5762
sp|Q5VSL9|STRP1_HUMAN	Q5VSL9	NA	NA	NA	NA	10.1644	10.1318	10.2961	10.0141	10.3915	NA	10.2825	10.8853	10.3389	9.7678	10.35	NA
sp|Q5VT25|MRCKA_HUMAN	Q5VT25	NA	NA	9.3085	8.87471	9.99875	10.3215	10.0521	10.5674	9.27244	9.99981	9.25138	9.25294	10.2649	9.37435	11.0461	11.1003
sp|Q5VT52|RPRD2_HUMAN	Q5VT52	NA	NA	NA	NA	NA	NA	NA	NA	NA	NA	10.4637	10.5171	11.3237	11.2349	11.1019	10.706
sp|Q5VW36|FOCAD_HUMAN	Q5VW36	NA	NA	NA	NA	10.8406	10.7472	10.7845	10.3922	NA	NA	NA	NA	NA	NA	NA	NA
sp|Q5VWZ2|LYPL1_HUMAN	Q5VWZ2	NA	NA	NA	NA	NA	12.8481	NA	NA	NA	NA	NA	12.7313	12.6169	13.4241	13.5999	13.3902
sp|Q5VYK3|ECM29_HUMAN	Q5VYK3	9.14782	8.32483	9.74413	8.97825	11.3895	10.9391	11.3113	11.1983	11.535	11.7505	11.5848	10.9244	11.5371	10.7751	11.0616	10.7116
sp|Q5W0V3|FHI2A_HUMAN	Q5W0V3	NA	NA	NA	NA	10.7426	10.7366	10.6698	10.7705	NA	NA	10.1575	10.3772	NA	NA	10.383	10.0516
sp|Q5XKP0|MIC13_HUMAN	Q5XKP0	NA	10.2892	NA	NA	10.4756	10.5238	10.3303	11.0314	12.1147	11.7029	11.2697	11.4222	12.9219	12.8379	12.4235	12.639
sp|Q5ZPR3|CD276_HUMAN	Q5ZPR3	NA	NA	NA	NA	12.2693	12.2934	12.3526	12.117	12.5228	12.4268	12.5769	12.6852	13.522	13.0665	13.0123	13.0117
sp|Q63HN8|RN213_HUMAN	Q63HN8	8.60267	8.77817	9.00513	8.5439	9.93488	9.74377	10.1298	10.5413	10.3867	10.9532	10.765	10.3748	10.7097	11.4466	11.5577	11.1076
[truncated: 1,236 more rows]
