# Supplementary material for: Fibrillar extracellular matrix produced by pericyte‐like cells facilitates glioma cell dissemination
Source: Brain Pathol. 2024 May 5;34(6):e13265. doi: 10.1111/bpa.13265 (PMC11483521; doi:10.1111/bpa.13265)
Supplement: Supplementary file 4 — Supplementary Table 4. Statistical analysis of 82 matrisome protein abundances detected using the SWATH‐MS approach in decellularized extracellular matrices produced by 46A and 80A FAP+ pericyte‐like cells isolated from human glioblastomas, human brain vascular pericytes (HBVP), and U87 glioma cells. Label (comparison), Log2FC (log2 fold change), SE (log2FC standard error), T‐value (test statistic of the Student test), DF (degree of freedom of the Student test), p‐value (raw p‐value), adj. p‐value (p‐values adjusted using the approach by Benjamini and Hochberg 1955), issue (issue column shows if there is any issue for inference in corresponding protein and comparison), Missing Percentage (number of measured intensities/ total number of intensities by protein, total number of intensities = number of features * the number of runs in a protein). Imputation Percentage (number of imputed intensities/total number of intensities by protein). [file BPA-34-e13265-s002.xlsx]

## Sheet: 2_Significance_testing_Matrisom
Supplementary table 4
Statistical analysis of 82 matrisome protein abundances detected using the SWATH-MS approach in decellularized extracellular matrices produced by 46A and 80A FAP+ pericyte-like cells isolated from human glioblastomas, human brain vascular pericytes (HBVP), and U87 glioma cells. Label (comparison), Log2FC (log2 fold change), SE (log2FC standard error), T value (test statistic of the Student test),…
Protein	Uniprot ID	Entry Name	Protein names	Label	log2FC	SE	Tvalue	DF	pvalue	adj.pvalue	issue	MissingPercentage	ImputationPercentage
sp|Q99715|COCA1_HUMAN	Q99715	COCA1_HUMAN	Collagen alpha-1(XII) chain	both FAP+ cultures-HBVP	-3.76492	0.139988	-26.8947	12	4.29123e-12	2.66057e-10	NA	0.355323	0.353406
sp|P55268|LAMB2_HUMAN	P55268	LAMB2_HUMAN	Laminin subunit beta-2 (Laminin B1s chain) (Laminin-11 subunit beta) (Laminin-14 subunit beta) (Laminin-15 subunit beta) (Laminin-3 subunit beta) (Laminin-4 subunit beta) (Laminin-7 subunit beta) (Laminin-9 subunit beta) (S-laminin subunit beta) (S-LAM beta)	both FAP+ cultures-HBVP	4.58122	0.186486	24.566	12	1.24953e-11	3.87355e-10	NA	0.442427	0.436549
sp|P07585|PGS2_HUMAN	P07585	PGS2_HUMAN	Decorin (Bone proteoglycan II) (PG-S2) (PG40)	both FAP+ cultures-HBVP	-5.33517	0.124851	-42.7324	8	9.91582e-11	1.5615e-09	NA	0.595238	0.345238
sp|P98095|FBLN2_HUMAN	P98095	FBLN2_HUMAN	Fibulin-2 (FIBL-2)	both FAP+ cultures-HBVP	2.8694	0.0864507	33.1912	9	1.00742e-10	1.5615e-09	NA	0.151157	0.144848
sp|Q6PCB0|VWA1_HUMAN	Q6PCB0	VWA1_HUMAN	von Willebrand factor A domain-containing protein 1	both FAP+ cultures-HBVP	3.90129	0.155012	25.1677	9	1.18635e-09	1.47107e-08	NA	0.45625	0.45625
sp|P14543|NID1_HUMAN	P14543	NID1_HUMAN	Nidogen-1 (NID-1) (Entactin)	both FAP+ cultures-HBVP	2.90928	0.11825	24.6027	9	1.45147e-09	1.49985e-08	NA	0.296136	0.288062
sp|P39060|COIA1_HUMAN	P39060	COIA1_HUMAN	Collagen alpha-1(XVIII) chain [Cleaved into: Endostatin; Non-collagenous domain 1 (NC1)]	both FAP+ cultures-HBVP	2.21011	0.0998325	22.1381	9	3.70054e-09	2.90787e-08	NA	0.162719	0.154825
sp|P23142|FBLN1_HUMAN	P23142	FBLN1_HUMAN	Fibulin-1 (FIBL-1)	both FAP+ cultures-HBVP	-2.1327	0.0964867	-22.1036	9	3.75209e-09	2.90787e-08	NA	0.0767974	0.0669935
sp|Q08431|MFGM_HUMAN	Q08431	MFGM_HUMAN	Lactadherin (Breast epithelial antigen BA46) (HMFG) (MFGM) (Milk fat globule-EGF factor 8) (MFG-E8) (SED1) [Cleaved into: Lactadherin short form; Medin]	both FAP+ cultures-HBVP	1.07722	0.0748873	14.3846	12	6.26904e-09	4.31867e-08	NA	0.190476	0.190476
sp|P13611|CSPG2_HUMAN	P13611	CSPG2_HUMAN	Versican core protein (Chondroitin sulfate proteoglycan core protein 2) (Chondroitin sulfate proteoglycan 2) (Glial hyaluronate-binding protein) (GHAP) (Large fibroblast proteoglycan) (PG-M)	both FAP+ cultures-HBVP	-2.73682	0.23168	-11.8129	12	5.76019e-08	3.53197e-07	NA	0.346899	0.332687
sp|Q9GZM7|TINAL_HUMAN	Q9GZM7	TINAL_HUMAN	Tubulointerstitial nephritis antigen-like (Glucocorticoid-inducible protein 5) (Oxidized LDL-responsive gene 2 protein) (OLRG-2) (Tubulointerstitial nephritis antigen-related protein) (TIN Ag-related protein) (TIN-Ag-RP)	both FAP+ cultures-HBVP	3.98814	0.282933	14.0957	10	6.34527e-08	3.53197e-07	NA	0.61131	0.598214
sp|O95967|FBLN4_HUMAN	O95967	FBLN4_HUMAN	EGF-containing fibulin-like extracellular matrix protein 2 (Fibulin-4) (FIBL-4) (Protein UPH1)	both FAP+ cultures-HBVP	-2.23666	0.14077	-15.8888	9	6.83607e-08	3.53197e-07	NA	0.299479	0.299479
sp|P98160|PGBM_HUMAN	P98160	PGBM_HUMAN	Basement membrane-specific heparan sulfate proteoglycan core protein (HSPG) (Perlecan) (PLC) [Cleaved into: Endorepellin; LG3 peptide]	both FAP+ cultures-HBVP	2.27735	0.206997	11.0018	12	1.26473e-07	6.03179e-07	NA	0.189634	0.177977
sp|O00468|AGRIN_HUMAN	O00468	AGRIN_HUMAN	Agrin [Cleaved into: Agrin N-terminal 110 kDa subunit; Agrin C-terminal 110 kDa subunit; Agrin C-terminal 90 kDa fragment (C90); Agrin C-terminal 22 kDa fragment (C22)]	both FAP+ cultures-HBVP	1.68256	0.143063	11.7609	11	1.43019e-07	6.33369e-07	NA	0.351986	0.351986
sp|Q9BXX0|EMIL2_HUMAN	Q9BXX0	EMIL2_HUMAN	EMILIN-2 (Elastin microfibril interface-located protein 2) (Elastin microfibril interfacer 2) (Protein FOAP-10)	both FAP+ cultures-HBVP	2.07008	0.163401	12.6687	10	1.75153e-07	7.23964e-07	NA	0.524621	0.357955
sp|Q14112|NID2_HUMAN	Q14112	NID2_HUMAN	Nidogen-2 (NID-2) (Osteonidogen)	both FAP+ cultures-HBVP	1.74566	0.125215	13.9414	9	2.12657e-07	8.24046e-07	NA	0.144928	0.133486
sp|Q92626|PXDN_HUMAN	Q92626	PXDN_HUMAN	Peroxidasin homolog (EC 1.11.2.-) (Melanoma-associated antigen MG50) (Peroxidasin 1) (hsPxd01) (Vascular peroxidase 1) (p53-responsive gene 2 protein) [Cleaved into: PXDN active fragment]	both FAP+ cultures-HBVP	1.0414	0.0853181	12.2061	10	2.48868e-07	9.07637e-07	NA	0.333333	0.322844
sp|P02751|FINC_HUMAN	P02751	FINC_HUMAN	Fibronectin (FN) (Cold-insoluble globulin) (CIG) [Cleaved into: Anastellin; Ugl-Y1; Ugl-Y2; Ugl-Y3]	both FAP+ cultures-HBVP	1.03727	0.101289	10.2407	12	2.76819e-07	9.53488e-07	NA	0.0687975	0.0514536
sp|Q9Y6C2|EMIL1_HUMAN	Q9Y6C2	EMIL1_HUMAN	EMILIN-1 (Elastin microfibril interface-located protein 1) (Elastin microfibril interfacer 1)	both FAP+ cultures-HBVP	-2.65681	0.213111	-12.4668	9	5.55942e-07	1.7699e-06	NA	0.279434	0.274847
sp|P11047|LAMC1_HUMAN	P11047	LAMC1_HUMAN	Laminin subunit gamma-1 (Laminin B2 chain) (Laminin-1 subunit gamma) (Laminin-10 subunit gamma) (Laminin-11 subunit gamma) (Laminin-2 subunit gamma) (Laminin-3 subunit gamma) (Laminin-4 subunit gamma) (Laminin-6 subunit gamma) (Laminin-7 subunit gamma) (Laminin-8 subunit gamma) (Laminin-9 subunit gamma) (S-laminin subunit gamma) (S-LAM gamma)	both FAP+ cultures-HBVP	1.6951	0.177021	9.57573	12	5.70936e-07	1.7699e-06	NA	0.183436	0.173169
sp|Q16363|LAMA4_HUMAN	Q16363	LAMA4_HUMAN	Laminin subunit alpha-4 (Laminin-14 subunit alpha) (Laminin-8 subunit alpha) (Laminin-9 subunit alpha)	both FAP+ cultures-HBVP	1.41238	0.115304	12.2492	9	6.46215e-07	1.90787e-06	NA	0.20086	0.193489
sp|O15230|LAMA5_HUMAN	O15230	LAMA5_HUMAN	Laminin subunit alpha-5 (Laminin-10 subunit alpha) (Laminin-11 subunit alpha) (Laminin-15 subunit alpha)	both FAP+ cultures-HBVP	2.92599	0.315024	9.28815	12	7.90562e-07	2.22795e-06	NA	0.437448	0.432226
sp|Q8IUX7|AEBP1_HUMAN	Q8IUX7	AEBP1_HUMAN	Adipocyte enhancer-binding protein 1 (AE-binding protein 1) (Aortic carboxypeptidase-like protein)	both FAP+ cultures-HBVP	-3.11718	0.127495	-24.4493	5	2.13411e-06	5.75282e-06	NA	0.607143	0.261905
sp|O00622|CCN1_HUMAN	O00622	CCN1_HUMAN	CCN family member 1 (Cellular communication network factor 1) (Cysteine-rich angiogenic inducer 61) (Insulin-like growth factor-binding protein 10) (IBP-10) (IGF-binding protein 10) (IGFBP-10) (Protein CYR61) (Protein GIG1)	both FAP+ cultures-HBVP	1.95797	0.211123	9.2741	10	3.1572e-06	8.15609e-06	NA	0.45	0.45
sp|P21810|PGS1_HUMAN	P21810	PGS1_HUMAN	Biglycan (Bone/cartilage proteoglycan I) (PG-S1)	both FAP+ cultures-HBVP	-0.945581	0.0941286	-10.0456	9	3.44513e-06	8.54392e-06	NA	0.216667	0.216667
sp|P20908|CO5A1_HUMAN	P20908	CO5A1_HUMAN	Collagen alpha-1(V) chain	both FAP+ cultures-HBVP	2.08127	0.248038	8.39094	10	7.73444e-06	1.84437e-05	NA	0.357678	0.357678
sp|Q9NR99|MXRA5_HUMAN	Q9NR99	MXRA5_HUMAN	Matrix-remodeling-associated protein 5 (Adhesion protein with leucine-rich repeats and immunoglobulin domains related to perlecan) (Adlican)	both FAP+ cultures-HBVP	-1.49947	0.157419	-9.5254	8	1.21885e-05	2.79884e-05	NA	0.54529	0.461957
sp|P07942|LAMB1_HUMAN	P07942	LAMB1_HUMAN	Laminin subunit beta-1 (Laminin B1 chain) (Laminin-1 subunit beta) (Laminin-10 subunit beta) (Laminin-12 subunit beta) (Laminin-2 subunit beta) (Laminin-6 subunit beta) (Laminin-8 subunit beta)	both FAP+ cultures-HBVP	0.968544	0.146691	6.60261	12	2.52816e-05	5.59806e-05	NA	0.199142	0.185049
sp|P24821|TENA_HUMAN	P24821	TENA_HUMAN	Tenascin (TN) (Cytotactin) (GMEM) (GP 150-225) (Glioma-associated-extracellular matrix antigen) (Hexabrachion) (JI) (Myotendinous antigen) (Neuronectin) (Tenascin-C) (TN-C)	both FAP+ cultures-HBVP	-2.58484	0.360373	-7.17268	10	3.02234e-05	6.45418e-05	NA	0.442041	0.263311
sp|P08572|CO4A2_HUMAN	P08572	CO4A2_HUMAN	Collagen alpha-2(IV) chain [Cleaved into: Canstatin]	both FAP+ cultures-HBVP	2.3141	0.302308	7.65478	9	3.14315e-05	6.45418e-05	NA	0.275253	0.275253
sp|Q16610|ECM1_HUMAN	Q16610	ECM1_HUMAN	Extracellular matrix protein 1 (Secretory component p85)	both FAP+ cultures-HBVP	0.90197	0.133949	6.73368	11	3.22709e-05	6.45418e-05	NA	0.520833	0.520833
sp|P07996|TSP1_HUMAN	P07996	TSP1_HUMAN	Thrombospondin-1 (Glycoprotein G)	both FAP+ cultures-HBVP	-3.02517	0.275485	-10.9812	6	3.38847e-05	6.56515e-05	NA	0.359722	0.109722
sp|P22692|IBP4_HUMAN	P22692	IBP4_HUMAN	Insulin-like growth factor-binding protein 4 (IBP-4) (IGF-binding protein 4) (IGFBP-4)	both FAP+ cultures-HBVP	1.2927	0.157181	8.22425	8	3.57689e-05	6.72022e-05	NA	0.486111	0.351852
sp|Q6ZMP0|THSD4_HUMAN	Q6ZMP0	THSD4_HUMAN	Thrombospondin type-1 domain-containing protein 4 (A disintegrin and metalloproteinase with thrombospondin motifs-like protein 6) (ADAMTS-like protein 6) (ADAMTSL-6)	both FAP+ cultures-HBVP	1.03822	0.159997	6.48898	11	4.49507e-05	8.19689e-05	NA	0.193277	0.193277
sp|P35442|TSP2_HUMAN	P35442	TSP2_HUMAN	Thrombospondin-2	both FAP+ cultures-HBVP	1.75294	0.252513	6.94199	9	6.74432e-05	0.000119471	NA	0.437037	0.437037
sp|P24043|LAMA2_HUMAN	P24043	LAMA2_HUMAN	Laminin subunit alpha-2 (Laminin M chain) (Laminin-12 subunit alpha) (Laminin-2 subunit alpha) (Laminin-4 subunit alpha) (Merosin heavy chain)	both FAP+ cultures-HBVP	2.24687	0.318475	7.05511	8	0.000106627	0.000183635	NA	0.504986	0.413818
sp|P22105|TENX_HUMAN	P22105	TENX_HUMAN	Tenascin-X (TN-X) (Hexabrachion-like protein)	both FAP+ cultures-HBVP	1.88403	0.231032	8.15485	6	0.000182904	0.000306488	NA	0.664441	0.414441
sp|O60687|SRPX2_HUMAN	O60687	SRPX2_HUMAN	Sushi repeat-containing protein SRPX2 (Sushi-repeat protein upregulated in leukemia)	both FAP+ cultures-HBVP	1.64388	0.247691	6.63681	7	0.000294091	0.000479832	NA	0.388889	0.222222
sp|P02462|CO4A1_HUMAN	P02462	CO4A1_HUMAN	Collagen alpha-1(IV) chain [Cleaved into: Arresten]	both FAP+ cultures-HBVP	2.12073	0.374636	5.66079	9	0.000309325	0.000491747	NA	0.166667	0.166667
sp|P05997|CO5A2_HUMAN	P05997	CO5A2_HUMAN	Collagen alpha-2(V) chain	both FAP+ cultures-HBVP	0.908255	0.178363	5.09217	11	0.000348283	0.000539838	NA	0.204545	0.204545
sp|P08493|MGP_HUMAN	P08493	MGP_HUMAN	Matrix Gla protein (MGP) (Cell growth-inhibiting gene 36 protein)	both FAP+ cultures-HBVP	0.547736	0.12761	4.29226	9	0.00201339	0.00304463	NA	0.208333	0.208333
sp|Q14767|LTBP2_HUMAN	Q14767	LTBP2_HUMAN	Latent-transforming growth factor beta-binding protein 2 (LTBP-2)	both FAP+ cultures-HBVP	0.942475	0.226237	4.16588	9	0.00242641	0.00358185	NA	0.425926	0.425926
sp|P02452|CO1A1_HUMAN	P02452	CO1A1_HUMAN	Collagen alpha-1(I) chain (Alpha-1 type I collagen)	both FAP+ cultures-HBVP	0.635354	0.175614	3.61791	12	0.00352807	0.00508698	NA	0.188	0.188
sp|P02461|CO3A1_HUMAN	P02461	CO3A1_HUMAN	Collagen alpha-1(III) chain	both FAP+ cultures-HBVP	0.685749	0.177055	3.87308	9	0.003771	0.00531369	NA	0.228175	0.228175
sp|P29279|CCN2_HUMAN	P29279	CCN2_HUMAN	CCN family member 2 (Cellular communication network factor 2) (Connective tissue growth factor) (Hypertrophic chondrocyte-specific protein 24) (Insulin-like growth factor-binding protein 8) (IBP-8) (IGF-binding protein 8) (IGFBP-8)	both FAP+ cultures-HBVP	0.831049	0.217581	3.81949	9	0.00409309	0.00563937	NA	0.444444	0.444444
sp|Q02388|CO7A1_HUMAN	Q02388	CO7A1_HUMAN	Collagen alpha-1(VII) chain (Long-chain collagen) (LC collagen)	both FAP+ cultures-HBVP	1.15182	0.393238	2.92905	11	0.0137136	0.0184835	NA	0.56893	0.56893
sp|P08123|CO1A2_HUMAN	P08123	CO1A2_HUMAN	Collagen alpha-2(I) chain (Alpha-2 type I collagen)	both FAP+ cultures-HBVP	0.557329	0.196577	2.83517	12	0.0150309	0.0198281	NA	0.0986842	0.0986842
sp|O00339|MATN2_HUMAN	O00339	MATN2_HUMAN	Matrilin-2	both FAP+ cultures-HBVP	0.466923	0.176458	2.64609	12	0.0213326	0.0275546	NA	0.427083	0.427083
sp|P12110|CO6A2_HUMAN	P12110	CO6A2_HUMAN	Collagen alpha-2(VI) chain	both FAP+ cultures-HBVP	0.321086	0.127372	2.52086	12	0.0268669	0.0339948	NA	0.130544	0.107654
sp|Q96HD1|CREL1_HUMAN	Q96HD1	CREL1_HUMAN	Protein disulfide isomerase CRELD1 (EC 5.3.4.1) (Cysteine-rich with EGF-like domain protein 1)	both FAP+ cultures-HBVP	0.392981	0.166199	2.36452	4	0.0772814	0.0958289	NA	0.5	0
sp|P35555|FBN1_HUMAN	P35555	FBN1_HUMAN	Fibrillin-1 [Cleaved into: Asprosin]	both FAP+ cultures-HBVP	-1.07963	0.567299	-1.9031	12	0.0812875	0.0988201	NA	0.466361	0.466361
sp|Q14766|LTBP1_HUMAN	Q14766	LTBP1_HUMAN	Latent-transforming growth factor beta-binding protein 1 (LTBP-1) (Transforming growth factor beta-1-binding protein 1) (TGF-beta1-BP-1)	both FAP+ cultures-HBVP	0.347558	0.185022	1.87847	9	0.093033	0.110924	NA	0.376126	0.362613
sp|Q07092|COGA1_HUMAN	Q07092	COGA1_HUMAN	Collagen alpha-1(XVI) chain	both FAP+ cultures-HBVP	-0.420611	0.232388	-1.80995	9	0.103742	0.121359	NA	0.344444	0.311111
sp|P78539|SRPX_HUMAN	P78539	SRPX_HUMAN	Sushi repeat-containing protein SRPX	both FAP+ cultures-HBVP	-0.258856	0.13969	-1.85308	4	0.137499	0.155773	NA	0.666667	0.25
sp|Q96CG8|CTHR1_HUMAN	Q96CG8	CTHR1_HUMAN	Collagen triple helix repeat-containing protein 1	both FAP+ cultures-HBVP	0.390476	0.240002	1.62697	9	0.138186	0.155773	NA	0.316667	0.316667
sp|P12111|CO6A3_HUMAN	P12111	CO6A3_HUMAN	Collagen alpha-3(VI) chain	both FAP+ cultures-HBVP	0.157378	0.127059	1.23863	12	0.239167	0.264792	NA	0.127846	0.109034
sp|Q6UXH1|CREL2_HUMAN	Q6UXH1	CREL2_HUMAN	Protein disulfide isomerase CRELD2 (EC 5.3.4.1) (Cysteine-rich with EGF-like domain protein 2)	both FAP+ cultures-HBVP	-0.286606	0.228775	-1.25278	6	0.256898	0.279433	NA	0.466667	0.216667
sp|P09486|SPRC_HUMAN	P09486	SPRC_HUMAN	SPARC (Basement-membrane protein 40) (BM-40) (Osteonectin) (ON) (Secreted protein acidic and rich in cysteine)	both FAP+ cultures-HBVP	-0.270803	0.366715	-0.738455	12	0.474434	0.507153	NA	0.359788	0.359788
sp|P27658|CO8A1_HUMAN	P27658	CO8A1_HUMAN	Collagen alpha-1(VIII) chain (Endothelial collagen) [Cleaved into: Vastatin]	both FAP+ cultures-HBVP	-0.135127	0.295968	-0.45656	9	0.658806	0.692305	NA	0.429012	0.429012
sp|Q8TER0|SNED1_HUMAN	Q8TER0	SNED1_HUMAN	Sushi, nidogen and EGF-like domain-containing protein 1 (Insulin-responsive sequence DNA-binding protein 1) (IRE-BP1)	both FAP+ cultures-HBVP	-0.042671	0.140245	-0.30426	7	0.769776	0.795435	NA	0.166667	0
sp|Q15582|BGH3_HUMAN	Q15582	BGH3_HUMAN	Transforming growth factor-beta-induced protein ig-h3 (Beta ig-h3) (Kerato-epithelin) (RGD-containing collagen-associated protein) (RGD-CAP)	both FAP+ cultures-HBVP	0.0152817	0.150234	0.101719	12	0.920659	0.935752	NA	0.172853	0.143741
sp|P12109|CO6A1_HUMAN	P12109	CO6A1_HUMAN	Collagen alpha-1(VI) chain	both FAP+ cultures-HBVP	0.00278636	0.136517	0.0204103	12	0.984052	0.984052	NA	0.153792	0.135534
sp|O00534|VMA5A_HUMAN	O00534	VMA5A_HUMAN	von Willebrand factor A domain-containing protein 5A (Breast cancer suppressor candidate 1) (BCSC-1) (Loss of heterozygosity 11 chromosomal region 2 gene A protein)	both FAP+ cultures-HBVP	-Inf	NA	NA	NA	NA	0	oneConditionMissing	0.666667	0
sp|O43854|EDIL3_HUMAN	O43854	EDIL3_HUMAN	EGF-like repeat and discoidin I-like domain-containing protein 3 (Developmentally-regulated endothelial cell locus 1 protein) (Integrin-binding protein DEL1)	both FAP+ cultures-HBVP	Inf	NA	NA	NA	NA	0	oneConditionMissing	0.677885	0.261218
sp|O94813|SLIT2_HUMAN	O94813	SLIT2_HUMAN	Slit homolog 2 protein (Slit-2) [Cleaved into: Slit homolog 2 protein N-product; Slit homolog 2 protein C-product]	both FAP+ cultures-HBVP	-Inf	NA	NA	NA	NA	0	oneConditionMissing	0.692308	0.192308
sp|O95428|PPN_HUMAN	O95428	PPN_HUMAN	Papilin	both FAP+ cultures-HBVP	Inf	NA	NA	NA	NA	0	oneConditionMissing	0.659091	0.0757576
sp|P12107|COBA1_HUMAN	P12107	COBA1_HUMAN	Collagen alpha-1(XI) chain	both FAP+ cultures-HBVP	Inf	NA	NA	NA	NA	0	oneConditionMissing	0.520833	0.1875
sp|P18065|IBP2_HUMAN	P18065	IBP2_HUMAN	Insulin-like growth factor-binding protein 2 (IBP-2) (IGF-binding protein 2) (IGFBP-2)	both FAP+ cultures-HBVP	Inf	NA	NA	NA	NA	0	oneConditionMissing	NA	NA
sp|P24593|IBP5_HUMAN	P24593	IBP5_HUMAN	Insulin-like growth factor-binding protein 5 (IBP-5) (IGF-binding protein 5) (IGFBP-5)	both FAP+ cultures-HBVP	-Inf	NA	NA	NA	NA	0	oneConditionMissing	0.666667	0
sp|P25940|CO5A3_HUMAN	P25940	CO5A3_HUMAN	Collagen alpha-3(V) chain	both FAP+ cultures-HBVP	Inf	NA	NA	NA	NA	0	oneConditionMissing	NA	NA
sp|P35556|FBN2_HUMAN	P35556	FBN2_HUMAN	Fibrillin-2 [Cleaved into: Placensin]	both FAP+ cultures-HBVP	-Inf	NA	NA	NA	NA	0	oneConditionMissing	0.701613	0.11828
sp|P39059|COFA1_HUMAN	P39059	COFA1_HUMAN	Collagen alpha-1(XV) chain [Cleaved into: Restin (Endostatin-XV) (Related to endostatin) (Restin-I); Restin-2 (Restin-II); Restin-3 (Restin-III); Restin-4 (Restin-IV)]	both FAP+ cultures-HBVP	-Inf	NA	NA	NA	NA	0	oneConditionMissing	0.381194	0.0433559
sp|Q05707|COEA1_HUMAN	Q05707	COEA1_HUMAN	Collagen alpha-1(XIV) chain (Undulin)	both FAP+ cultures-HBVP	-Inf	NA	NA	NA	NA	0	oneConditionMissing	0.701623	0.0337079
sp|Q12805|FBLN3_HUMAN	Q12805	FBLN3_HUMAN	EGF-containing fibulin-like extracellular matrix protein 1 (Extracellular protein S1-5) (Fibrillin-like protein) (Fibulin-3) (FIBL-3)	both FAP+ cultures-HBVP	-Inf	NA	NA	NA	NA	0	oneConditionMissing	NA	NA
sp|Q15063|POSTN_HUMAN	Q15063	POSTN_HUMAN	Periostin (PN) (Osteoblast-specific factor 2) (OSF-2)	both FAP+ cultures-HBVP	-Inf	NA	NA	NA	NA	0	oneConditionMissing	0.527778	0.194444
sp|Q15113|PCOC1_HUMAN	Q15113	PCOC1_HUMAN	Procollagen C-endopeptidase enhancer 1 (Procollagen COOH-terminal proteinase enhancer 1) (PCPE-1) (Procollagen C-proteinase enhancer 1) (Type 1 procollagen C-proteinase enhancer protein) (Type I procollagen COOH-terminal proteinase enhancer)	both FAP+ cultures-HBVP	-Inf	NA	NA	NA	NA	0	oneConditionMissing	0.333333	0
sp|Q16270|IBP7_HUMAN	Q16270	IBP7_HUMAN	Insulin-like growth factor-binding protein 7 (IBP-7) (IGF-binding protein 7) (IGFBP-7) (IGFBP-rP1) (MAC25 protein) (PGI2-stimulating factor) (Prostacyclin-stimulating factor) (Tumor-derived adhesion factor) (TAF)	both FAP+ cultures-HBVP	Inf	NA	NA	NA	NA	0	oneConditionMissing	0.418889	0.0833333
sp|Q16787|LAMA3_HUMAN	Q16787	LAMA3_HUMAN	Laminin subunit alpha-3 (Epiligrin 170 kDa subunit) (E170) (Epiligrin subunit alpha) (Kalinin subunit alpha) (Laminin-5 subunit alpha) (Laminin-6 subunit alpha) (Laminin-7 subunit alpha) (Nicein subunit alpha)	both FAP+ cultures-HBVP	Inf	NA	NA	NA	NA	0	oneConditionMissing	0.333333	0
sp|Q7Z7G0|TARSH_HUMAN	Q7Z7G0	TARSH_HUMAN	Target of Nesh-SH3 (Tarsh) (ABI gene family member 3-binding protein) (Nesh-binding protein) (NeshBP)	both FAP+ cultures-HBVP	Inf	NA	NA	NA	NA	0	oneConditionMissing	0.510417	0.177083
sp|Q8N2S1|LTBP4_HUMAN	Q8N2S1	LTBP4_HUMAN	Latent-transforming growth factor beta-binding protein 4 (LTBP-4)	both FAP+ cultures-HBVP	-Inf	NA	NA	NA	NA	0	oneConditionMissing	0.673851	0.0833333
sp|Q9HB63|NET4_HUMAN	Q9HB63	NET4_HUMAN	Netrin-4 (Beta-netrin) (Hepar-derived netrin-like protein)	both FAP+ cultures-HBVP	Inf	NA	NA	NA	NA	0	oneConditionMissing	NA	NA
sp|Q9UBX5|FBLN5_HUMAN	Q9UBX5	FBLN5_HUMAN	Fibulin-5 (FIBL-5) (Developmental arteries and neural crest EGF-like protein) (Dance) (Urine p50 protein) (UP50)	both FAP+ cultures-HBVP	-Inf	NA	NA	NA	NA	0	oneConditionMissing	0.661859	0.233974
sp|P02751|FINC_HUMAN	P02751	FINC_HUMAN	Fibronectin (FN) (Cold-insoluble globulin) (CIG) [Cleaved into: Anastellin; Ugl-Y1; Ugl-Y2; Ugl-Y3]	both FAP+ cultures-U87	5.43875	0.101289	53.6952	12	1.11022e-15	2.38698e-14	NA	0.176908	0.162207
sp|Q08431|MFGM_HUMAN	Q08431	MFGM_HUMAN	Lactadherin (Breast epithelial antigen BA46) (HMFG) (MFGM) (Milk fat globule-EGF factor 8) (MFG-E8) (SED1) [Cleaved into: Lactadherin short form; Medin]	both FAP+ cultures-U87	4.02271	0.0748873	53.7169	12	1.11022e-15	2.38698e-14	NA	0.357143	0.357143
sp|P11047|LAMC1_HUMAN	P11047	LAMC1_HUMAN	Laminin subunit gamma-1 (Laminin B2 chain) (Laminin-1 subunit gamma) (Laminin-10 subunit gamma) (Laminin-11 subunit gamma) (Laminin-2 subunit gamma) (Laminin-3 subunit gamma) (Laminin-4 subunit gamma) (Laminin-6 subunit gamma) (Laminin-7 subunit gamma) (Laminin-8 subunit gamma) (Laminin-9 subunit gamma) (S-laminin subunit gamma) (S-LAM gamma)	both FAP+ cultures-U87	5.93177	0.177021	33.5089	12	3.16636e-13	4.53844e-12	NA	0.395619	0.385352
sp|P55268|LAMB2_HUMAN	P55268	LAMB2_HUMAN	Laminin subunit beta-2 (Laminin B1s chain) (Laminin-11 subunit beta) (Laminin-14 subunit beta) (Laminin-15 subunit beta) (Laminin-3 subunit beta) (Laminin-4 subunit beta) (Laminin-7 subunit beta) (Laminin-9 subunit beta) (S-laminin subunit beta) (S-LAM beta)	both FAP+ cultures-U87	6.04902	0.186486	32.4368	12	4.66294e-13	5.01266e-12	NA	0.453838	0.448997
sp|P98160|PGBM_HUMAN	P98160	PGBM_HUMAN	Basement membrane-specific heparan sulfate proteoglycan core protein (HSPG) (Perlecan) (PLC) [Cleaved into: Endorepellin; LG3 peptide]	both FAP+ cultures-U87	5.90077	0.206997	28.5065	12	2.15561e-12	1.5665e-11	NA	0.403969	0.392312
sp|P07942|LAMB1_HUMAN	P07942	LAMB1_HUMAN	Laminin subunit beta-1 (Laminin B1 chain) (Laminin-1 subunit beta) (Laminin-10 subunit beta) (Laminin-12 subunit beta) (Laminin-2 subunit beta) (Laminin-6 subunit beta) (Laminin-8 subunit beta)	both FAP+ cultures-U87	4.17674	0.146691	28.473	12	2.18581e-12	1.5665e-11	NA	0.423203	0.410743
sp|P02452|CO1A1_HUMAN	P02452	CO1A1_HUMAN	Collagen alpha-1(I) chain (Alpha-1 type I collagen)	both FAP+ cultures-U87	4.67468	0.175614	26.6191	12	4.84657e-12	2.97718e-11	NA	0.302667	0.302667
sp|Q92626|PXDN_HUMAN	Q92626	PXDN_HUMAN	Peroxidasin homolog (EC 1.11.2.-) (Melanoma-associated antigen MG50) (Peroxidasin 1) (hsPxd01) (Vascular peroxidase 1) (p53-responsive gene 2 protein) [Cleaved into: PXDN active fragment]	both FAP+ cultures-U87	3.86761	0.110145	35.1138	10	8.32223e-12	4.4732e-11	NA	0.532925	0.357517
sp|O00468|AGRIN_HUMAN	O00468	AGRIN_HUMAN	Agrin [Cleaved into: Agrin N-terminal 110 kDa subunit; Agrin C-terminal 110 kDa subunit; Agrin C-terminal 90 kDa fragment (C90); Agrin C-terminal 22 kDa fragment (C22)]	both FAP+ cultures-U87	4.30569	0.158162	27.2233	11	1.91518e-11	9.1503e-11	NA	0.506919	0.422984
sp|P08123|CO1A2_HUMAN	P08123	CO1A2_HUMAN	Collagen alpha-2(I) chain (Alpha-2 type I collagen)	both FAP+ cultures-U87	4.56923	0.196577	23.244	12	2.39619e-11	1.03036e-10	NA	0.309211	0.309211
sp|Q99715|COCA1_HUMAN	Q99715	COCA1_HUMAN	Collagen alpha-1(XII) chain	both FAP+ cultures-U87	2.98156	0.139988	21.2987	12	6.68299e-11	2.61244e-10	NA	0.668696	0.667005
sp|P98095|FBLN2_HUMAN	P98095	FBLN2_HUMAN	Fibulin-2 (FIBL-2)	both FAP+ cultures-U87	4.73611	0.149737	31.6295	9	1.54926e-10	5.55153e-10	NA	0.366456	0.111725
sp|P05997|CO5A2_HUMAN	P05997	CO5A2_HUMAN	Collagen alpha-2(V) chain	both FAP+ cultures-U87	3.90351	0.197188	19.7959	11	5.96587e-10	1.97333e-09	NA	0.454545	0.371212
sp|P12110|CO6A2_HUMAN	P12110	CO6A2_HUMAN	Collagen alpha-2(VI) chain	both FAP+ cultures-U87	2.21457	0.127372	17.3867	12	7.1055e-10	2.1824e-09	NA	0.142704	0.125179
sp|P12111|CO6A3_HUMAN	P12111	CO6A3_HUMAN	Collagen alpha-3(VI) chain	both FAP+ cultures-U87	2.1548	0.127059	16.9591	12	9.47662e-10	2.71663e-09	NA	0.161934	0.142883
sp|O15230|LAMA5_HUMAN	O15230	LAMA5_HUMAN	Laminin subunit alpha-5 (Laminin-10 subunit alpha) (Laminin-11 subunit alpha) (Laminin-15 subunit alpha)	both FAP+ cultures-U87	5.22196	0.315024	16.5764	12	1.2333e-09	3.31448e-09	NA	0.530806	0.525585
sp|Q16363|LAMA4_HUMAN	Q16363	LAMA4_HUMAN	Laminin subunit alpha-4 (Laminin-14 subunit alpha) (Laminin-8 subunit alpha) (Laminin-9 subunit alpha)	both FAP+ cultures-U87	4.58188	0.199712	22.9424	9	2.69771e-09	6.82361e-09	NA	0.43878	0.183251
sp|P12109|CO6A1_HUMAN	P12109	CO6A1_HUMAN	Collagen alpha-1(VI) chain	both FAP+ cultures-U87	2.07042	0.136517	15.166	12	3.42673e-09	8.18607e-09	NA	0.195459	0.176732
sp|Q6ZMP0|THSD4_HUMAN	Q6ZMP0	THSD4_HUMAN	Thrombospondin type-1 domain-containing protein 4 (A disintegrin and metalloproteinase with thrombospondin motifs-like protein 6) (ADAMTS-like protein 6) (ADAMTSL-6)	both FAP+ cultures-U87	2.89391	0.176884	16.3605	11	4.55478e-09	1.03082e-08	NA	0.39916	0.315826
sp|Q14112|NID2_HUMAN	Q14112	NID2_HUMAN	Nidogen-2 (NID-2) (Osteonidogen)	both FAP+ cultures-U87	4.17006	0.216878	19.2277	9	1.28468e-08	2.76206e-08	NA	0.409611	0.15103
sp|Q9BXX0|EMIL2_HUMAN	Q9BXX0	EMIL2_HUMAN	EMILIN-2 (Elastin microfibril interface-located protein 2) (Elastin microfibril interfacer 2) (Protein FOAP-10)	both FAP+ cultures-U87	1.87495	0.12657	14.8136	10	3.94247e-08	8.07267e-08	NA	0.49053	0.49053
sp|Q7Z7G0|TARSH_HUMAN	Q7Z7G0	TARSH_HUMAN	Target of Nesh-SH3 (Tarsh) (ABI gene family member 3-binding protein) (Nesh-binding protein) (NeshBP)	both FAP+ cultures-U87	2.32478	0.109255	21.2785	7	1.27484e-07	2.49173e-07	NA	0.475694	0.309028
sp|Q16610|ECM1_HUMAN	Q16610	ECM1_HUMAN	Extracellular matrix protein 1 (Secretory component p85)	both FAP+ cultures-U87	1.68465	0.148086	11.3761	11	2.00984e-07	3.75753e-07	NA	0.59375	0.510417
sp|P07585|PGS2_HUMAN	P07585	PGS2_HUMAN	Decorin (Bone proteoglycan II) (PG-S2) (PG40)	both FAP+ cultures-U87	-2.03614	0.13378	-15.2201	8	3.44175e-07	6.16648e-07	NA	0.861111	0.527778
sp|Q9GZM7|TINAL_HUMAN	Q9GZM7	TINAL_HUMAN	Tubulointerstitial nephritis antigen-like (Glucocorticoid-inducible protein 5) (Oxidized LDL-responsive gene 2 protein) (OLRG-2) (Tubulointerstitial nephritis antigen-related protein) (TIN Ag-related protein) (TIN-Ag-RP)	both FAP+ cultures-U87	4.0738	0.365264	11.153	10	5.79678e-07	9.97046e-07	NA	0.625595	0.452976
sp|P20908|CO5A1_HUMAN	P20908	CO5A1_HUMAN	Collagen alpha-1(V) chain	both FAP+ cultures-U87	3.34452	0.320216	10.4446	10	1.06542e-06	1.76204e-06	NA	0.473783	0.307116
sp|O00622|CCN1_HUMAN	O00622	CCN1_HUMAN	CCN family member 1 (Cellular communication network factor 1) (Cysteine-rich angiogenic inducer 61) (Insulin-like growth factor-binding protein 10) (IBP-10) (IGF-binding protein 10) (IGFBP-10) (Protein CYR61) (Protein GIG1)	both FAP+ cultures-U87	2.68716	0.272558	9.85904	10	1.81017e-06	2.88286e-06	NA	0.523333	0.356667
sp|Q14766|LTBP1_HUMAN	Q14766	LTBP1_HUMAN	Latent-transforming growth factor beta-binding protein 1 (LTBP-1) (Transforming growth factor beta-1-binding protein 1) (TGF-beta1-BP-1)	both FAP+ cultures-U87	3.44354	0.320467	10.7454	9	1.96089e-06	3.01137e-06	NA	0.569257	0.309122
sp|P09486|SPRC_HUMAN	P09486	SPRC_HUMAN	SPARC (Basement-membrane protein 40) (BM-40) (Osteonectin) (ON) (Secreted protein acidic and rich in cysteine)	both FAP+ cultures-U87	2.90662	0.366715	7.92608	12	4.13423e-06	6.13007e-06	NA	0.556878	0.556878
sp|O00339|MATN2_HUMAN	O00339	MATN2_HUMAN	Matrilin-2	both FAP+ cultures-U87	1.36464	0.176458	7.73348	12	5.3097e-06	7.61057e-06	NA	0.489583	0.489583
sp|P24821|TENA_HUMAN	P24821	TENA_HUMAN	Tenascin (TN) (Cytotactin) (GMEM) (GP 150-225) (Glioma-associated-extracellular matrix antigen) (Hexabrachion) (JI) (Myotendinous antigen) (Neuronectin) (Tenascin-C) (TN-C)	both FAP+ cultures-U87	-2.97844	0.360373	-8.26486	10	8.84237e-06	1.22652e-05	NA	0.44939	0.269967
sp|P08572|CO4A2_HUMAN	P08572	CO4A2_HUMAN	Collagen alpha-2(IV) chain [Cleaved into: Canstatin]	both FAP+ cultures-U87	4.59744	0.523612	8.78025	9	1.04468e-05	1.40379e-05	NA	0.440025	0.190025
sp|P13611|CSPG2_HUMAN	P13611	CSPG2_HUMAN	Versican core protein (Chondroitin sulfate proteoglycan core protein 2) (Chondroitin sulfate proteoglycan 2) (Glial hyaluronate-binding protein) (GHAP) (Large fibroblast proteoglycan) (PG-M)	both FAP+ cultures-U87	1.47357	0.23168	6.36036	12	3.60838e-05	4.70183e-05	NA	0.540052	0.52584
sp|Q9Y6C2|EMIL1_HUMAN	Q9Y6C2	EMIL1_HUMAN	EMILIN-1 (Elastin microfibril interface-located protein 1) (Elastin microfibril interfacer 1)	both FAP+ cultures-U87	2.04644	0.369119	5.54412	9	0.000359137	0.000454203	NA	0.598242	0.344801
sp|Q02388|CO7A1_HUMAN	Q02388	CO7A1_HUMAN	Collagen alpha-1(VII) chain (Long-chain collagen) (LC collagen)	both FAP+ cultures-U87	2.10345	0.434741	4.8384	11	0.000520325	0.000639256	NA	0.628601	0.545267
sp|P22105|TENX_HUMAN	P22105	TENX_HUMAN	Tenascin-X (TN-X) (Hexabrachion-like protein)	both FAP+ cultures-U87	2.03846	0.307732	6.62413	6	0.000570405	0.000681317	NA	0.666914	0.333581
sp|P27658|CO8A1_HUMAN	P27658	CO8A1_HUMAN	Collagen alpha-1(VIII) chain (Endothelial collagen) [Cleaved into: Vastatin]	both FAP+ cultures-U87	2.45352	0.512631	4.78614	9	0.000992725	0.00115371	NA	0.595679	0.345679
sp|O43854|EDIL3_HUMAN	O43854	EDIL3_HUMAN	EGF-like repeat and discoidin I-like domain-containing protein 3 (Developmentally-regulated endothelial cell locus 1 protein) (Integrin-binding protein DEL1)	both FAP+ cultures-U87	0.633185	0.14043	4.50891	8	0.00197865	0.002239	NA	0.578526	0.495192
sp|P35442|TSP2_HUMAN	P35442	TSP2_HUMAN	Thrombospondin-2	both FAP+ cultures-U87	1.6878	0.437365	3.85902	9	0.00385283	0.00424799	NA	0.533333	0.283333
sp|Q96HD1|CREL1_HUMAN	Q96HD1	CREL1_HUMAN	Protein disulfide isomerase CRELD1 (EC 5.3.4.1) (Cysteine-rich with EGF-like domain protein 1)	both FAP+ cultures-U87	0.672186	0.18472	3.63895	4	0.0219851	0.023634	NA	0.583333	0
sp|Q15582|BGH3_HUMAN	Q15582	BGH3_HUMAN	Transforming growth factor-beta-induced protein ig-h3 (Beta ig-h3) (Kerato-epithelin) (RGD-containing collagen-associated protein) (RGD-CAP)	both FAP+ cultures-U87	0.298137	0.150234	1.98449	12	0.070547	0.0739883	NA	0.188865	0.162664
sp|Q6UXH1|CREL2_HUMAN	Q6UXH1	CREL2_HUMAN	Protein disulfide isomerase CRELD2 (EC 5.3.4.1) (Cysteine-rich with EGF-like domain protein 2)	both FAP+ cultures-U87	0.599899	0.34946	1.71665	6	0.136857	0.140116	NA	0.666667	0.166667
sp|P35555|FBN1_HUMAN	P35555	FBN1_HUMAN	Fibrillin-1 [Cleaved into: Asprosin]	both FAP+ cultures-U87	0.0146421	0.567299	0.0258102	12	0.979833	0.979833	NA	0.510703	0.510703
sp|O00534|VMA5A_HUMAN	O00534	VMA5A_HUMAN	von Willebrand factor A domain-containing protein 5A (Breast cancer suppressor candidate 1) (BCSC-1) (Loss of heterozygosity 11 chromosomal region 2 gene A protein)	both FAP+ cultures-U87	-Inf	NA	NA	NA	NA	0	oneConditionMissing	0.916667	0
sp|O60687|SRPX2_HUMAN	O60687	SRPX2_HUMAN	Sushi repeat-containing protein SRPX2 (Sushi-repeat protein upregulated in leukemia)	both FAP+ cultures-U87	Inf	NA	NA	NA	NA	0	oneConditionMissing	0.444444	0.111111
sp|O94813|SLIT2_HUMAN	O94813	SLIT2_HUMAN	Slit homolog 2 protein (Slit-2) [Cleaved into: Slit homolog 2 protein N-product; Slit homolog 2 protein C-product]	both FAP+ cultures-U87	-Inf	NA	NA	NA	NA	0	oneConditionMissing	0.935897	0.435897
sp|O95428|PPN_HUMAN	O95428	PPN_HUMAN	Papilin	both FAP+ cultures-U87	Inf	NA	NA	NA	NA	0	oneConditionMissing	0.659091	0.0757576
sp|O95967|FBLN4_HUMAN	O95967	FBLN4_HUMAN	EGF-containing fibulin-like extracellular matrix protein 2 (Fibulin-4) (FIBL-4) (Protein UPH1)	both FAP+ cultures-U87	Inf	NA	NA	NA	NA	0	oneConditionMissing	0.596354	0.263021
sp|P02461|CO3A1_HUMAN	P02461	CO3A1_HUMAN	Collagen alpha-1(III) chain	both FAP+ cultures-U87	Inf	NA	NA	NA	NA	0	oneConditionMissing	0.5	0.166667
sp|P02462|CO4A1_HUMAN	P02462	CO4A1_HUMAN	Collagen alpha-1(IV) chain [Cleaved into: Arresten]	both FAP+ cultures-U87	Inf	NA	NA	NA	NA	0	oneConditionMissing	0.395833	0.0625
sp|P07996|TSP1_HUMAN	P07996	TSP1_HUMAN	Thrombospondin-1 (Glycoprotein G)	both FAP+ cultures-U87	Inf	NA	NA	NA	NA	0	oneConditionMissing	0.693056	0.109722
sp|P08493|MGP_HUMAN	P08493	MGP_HUMAN	Matrix Gla protein (MGP) (Cell growth-inhibiting gene 36 protein)	both FAP+ cultures-U87	Inf	NA	NA	NA	NA	0	oneConditionMissing	0.5	0.166667
sp|P12107|COBA1_HUMAN	P12107	COBA1_HUMAN	Collagen alpha-1(XI) chain	both FAP+ cultures-U87	Inf	NA	NA	NA	NA	0	oneConditionMissing	0.520833	0.1875
sp|P14543|NID1_HUMAN	P14543	NID1_HUMAN	Nidogen-1 (NID-1) (Entactin)	both FAP+ cultures-U87	Inf	NA	NA	NA	NA	0	oneConditionMissing	0.453864	0.11361
sp|P18065|IBP2_HUMAN	P18065	IBP2_HUMAN	Insulin-like growth factor-binding protein 2 (IBP-2) (IGF-binding protein 2) (IGFBP-2)	both FAP+ cultures-U87	Inf	NA	NA	NA	NA	0	oneConditionMissing	NA	NA
sp|P21810|PGS1_HUMAN	P21810	PGS1_HUMAN	Biglycan (Bone/cartilage proteoglycan I) (PG-S1)	both FAP+ cultures-U87	Inf	NA	NA	NA	NA	0	oneConditionMissing	0.516667	0.183333
sp|P22692|IBP4_HUMAN	P22692	IBP4_HUMAN	Insulin-like growth factor-binding protein 4 (IBP-4) (IGF-binding protein 4) (IGFBP-4)	both FAP+ cultures-U87	Inf	NA	NA	NA	NA	0	oneConditionMissing	0.569444	0.199074
sp|P23142|FBLN1_HUMAN	P23142	FBLN1_HUMAN	Fibulin-1 (FIBL-1)	both FAP+ cultures-U87	Inf	NA	NA	NA	NA	0	oneConditionMissing	0.405229	0.0653595
sp|P24043|LAMA2_HUMAN	P24043	LAMA2_HUMAN	Laminin subunit alpha-2 (Laminin M chain) (Laminin-12 subunit alpha) (Laminin-2 subunit alpha) (Laminin-4 subunit alpha) (Merosin heavy chain)	both FAP+ cultures-U87	Inf	NA	NA	NA	NA	0	oneConditionMissing	0.537749	0.198718
sp|P24593|IBP5_HUMAN	P24593	IBP5_HUMAN	Insulin-like growth factor-binding protein 5 (IBP-5) (IGF-binding protein 5) (IGFBP-5)	both FAP+ cultures-U87	NA	NA	NA	NA	NA	NA	completeMissing	0.833333	0
sp|P25940|CO5A3_HUMAN	P25940	CO5A3_HUMAN	Collagen alpha-3(V) chain	both FAP+ cultures-U87	Inf	NA	NA	NA	NA	0	oneConditionMissing	NA	NA
sp|P29279|CCN2_HUMAN	P29279	CCN2_HUMAN	CCN family member 2 (Cellular communication network factor 2) (Connective tissue growth factor) (Hypertrophic chondrocyte-specific protein 24) (Insulin-like growth factor-binding protein 8) (IBP-8) (IGF-binding protein 8) (IGFBP-8)	both FAP+ cultures-U87	Inf	NA	NA	NA	NA	0	oneConditionMissing	0.583333	0.25
sp|P35556|FBN2_HUMAN	P35556	FBN2_HUMAN	Fibrillin-2 [Cleaved into: Placensin]	both FAP+ cultures-U87	NA	NA	NA	NA	NA	NA	completeMissing	0.991935	0.0752688
sp|P39059|COFA1_HUMAN	P39059	COFA1_HUMAN	Collagen alpha-1(XV) chain [Cleaved into: Restin (Endostatin-XV) (Related to endostatin) (Restin-I); Restin-2 (Restin-II); Restin-3 (Restin-III); Restin-4 (Restin-IV)]	both FAP+ cultures-U87	NA	NA	NA	NA	NA	NA	completeMissing	0.684122	0.0152027
sp|P39060|COIA1_HUMAN	P39060	COIA1_HUMAN	Collagen alpha-1(XVIII) chain [Cleaved into: Endostatin; Non-collagenous domain 1 (NC1)]	both FAP+ cultures-U87	Inf	NA	NA	NA	NA	0	oneConditionMissing	0.421053	0.0815789
sp|P78539|SRPX_HUMAN	P78539	SRPX_HUMAN	Sushi repeat-containing protein SRPX	both FAP+ cultures-U87	Inf	NA	NA	NA	NA	0	oneConditionMissing	0.75	0.166667
sp|Q05707|COEA1_HUMAN	Q05707	COEA1_HUMAN	Collagen alpha-1(XIV) chain (Undulin)	both FAP+ cultures-U87	-Inf	NA	NA	NA	NA	0	oneConditionMissing	0.994382	0.160424
sp|Q07092|COGA1_HUMAN	Q07092	COGA1_HUMAN	Collagen alpha-1(XVI) chain	both FAP+ cultures-U87	Inf	NA	NA	NA	NA	0	oneConditionMissing	0.566667	0.211111
sp|Q12805|FBLN3_HUMAN	Q12805	FBLN3_HUMAN	EGF-containing fibulin-like extracellular matrix protein 1 (Extracellular protein S1-5) (Fibrillin-like protein) (Fibulin-3) (FIBL-3)	both FAP+ cultures-U87	NA	NA	NA	NA	NA	NA	completeMissing	NA	NA
sp|Q14767|LTBP2_HUMAN	Q14767	LTBP2_HUMAN	Latent-transforming growth factor beta-binding protein 2 (LTBP-2)	both FAP+ cultures-U87	Inf	NA	NA	NA	NA	0	oneConditionMissing	0.555556	0.222222
sp|Q15063|POSTN_HUMAN	Q15063	POSTN_HUMAN	Periostin (PN) (Osteoblast-specific factor 2) (OSF-2)	both FAP+ cultures-U87	NA	NA	NA	NA	NA	NA	completeMissing	0.666667	0
sp|Q15113|PCOC1_HUMAN	Q15113	PCOC1_HUMAN	Procollagen C-endopeptidase enhancer 1 (Procollagen COOH-terminal proteinase enhancer 1) (PCPE-1) (Procollagen C-proteinase enhancer 1) (Type 1 procollagen C-proteinase enhancer protein) (Type I procollagen COOH-terminal proteinase enhancer)	both FAP+ cultures-U87	-Inf	NA	NA	NA	NA	0	oneConditionMissing	0.416667	0
sp|Q16270|IBP7_HUMAN	Q16270	IBP7_HUMAN	Insulin-like growth factor-binding protein 7 (IBP-7) (IGF-binding protein 7) (IGFBP-7) (IGFBP-rP1) (MAC25 protein) (PGI2-stimulating factor) (Prostacyclin-stimulating factor) (Tumor-derived adhesion factor) (TAF)	both FAP+ cultures-U87	Inf	NA	NA	NA	NA	0	oneConditionMissing	0.418889	0.0833333
sp|Q16787|LAMA3_HUMAN	Q16787	LAMA3_HUMAN	Laminin subunit alpha-3 (Epiligrin 170 kDa subunit) (E170) (Epiligrin subunit alpha) (Kalinin subunit alpha) (Laminin-5 subunit alpha) (Laminin-6 subunit alpha) (Laminin-7 subunit alpha) (Nicein subunit alpha)	both FAP+ cultures-U87	Inf	NA	NA	NA	NA	0	oneConditionMissing	0.333333	0
sp|Q6PCB0|VWA1_HUMAN	Q6PCB0	VWA1_HUMAN	von Willebrand factor A domain-containing protein 1	both FAP+ cultures-U87	Inf	NA	NA	NA	NA	0	oneConditionMissing	0.552083	0.21875
sp|Q8IUX7|AEBP1_HUMAN	Q8IUX7	AEBP1_HUMAN	Adipocyte enhancer-binding protein 1 (AE-binding protein 1) (Aortic carboxypeptidase-like protein)	both FAP+ cultures-U87	Inf	NA	NA	NA	NA	0	oneConditionMissing	0.928571	0.25
sp|Q8N2S1|LTBP4_HUMAN	Q8N2S1	LTBP4_HUMAN	Latent-transforming growth factor beta-binding protein 4 (LTBP-4)	both FAP+ cultures-U87	NA	NA	NA	NA	NA	NA	completeMissing	0.998563	0.0747126
sp|Q8TER0|SNED1_HUMAN	Q8TER0	SNED1_HUMAN	Sushi, nidogen and EGF-like domain-containing protein 1 (Insulin-responsive sequence DNA-binding protein 1) (IRE-BP1)	both FAP+ cultures-U87	Inf	NA	NA	NA	NA	0	oneConditionMissing	0.5	0
sp|Q96CG8|CTHR1_HUMAN	Q96CG8	CTHR1_HUMAN	Collagen triple helix repeat-containing protein 1	both FAP+ cultures-U87	Inf	NA	NA	NA	NA	0	oneConditionMissing	0.5	0.166667
sp|Q9HB63|NET4_HUMAN	Q9HB63	NET4_HUMAN	Netrin-4 (Beta-netrin) (Hepar-derived netrin-like protein)	both FAP+ cultures-U87	Inf	NA	NA	NA	NA	0	oneConditionMissing	NA	NA
sp|Q9NR99|MXRA5_HUMAN	Q9NR99	MXRA5_HUMAN	Matrix-remodeling-associated protein 5 (Adhesion protein with leucine-rich repeats and immunoglobulin domains related to perlecan) (Adlican)	both FAP+ cultures-U87	Inf	NA	NA	NA	NA	0	oneConditionMissing	0.807971	0.391304
sp|Q9UBX5|FBLN5_HUMAN	Q9UBX5	FBLN5_HUMAN	Fibulin-5 (FIBL-5) (Developmental arteries and neural crest EGF-like protein) (Dance) (Urine p50 protein) (UP50)	both FAP+ cultures-U87	-Inf	NA	NA	NA	NA	0	oneConditionMissing	0.963141	0.290064
sp|P55268|LAMB2_HUMAN	P55268			46A-HBVP	6.02646	0.215336	27.9863	12	2.68074e-12	1.82291e-10	NA	0.484959	0.479253
sp|P98095|FBLN2_HUMAN	P98095			46A-HBVP	3.4887	0.0998246	34.9483	9	6.35325e-11	1.34108e-09	NA	0.199921	0.193612
sp|Q92626|PXDN_HUMAN	Q92626			46A-HBVP	2.76576	0.0985168	28.0739	10	7.6378e-11	1.34108e-09	NA	0.226399	0.215909
sp|P39060|COIA1_HUMAN	P39060			46A-HBVP	3.93233	0.115277	34.1121	9	7.88871e-11	1.34108e-09	NA	0.148684	0.143421
sp|P14543|NID1_HUMAN	P14543			46A-HBVP	4.33837	0.136544	31.7727	9	1.48802e-10	2.02371e-09	NA	0.277682	0.274221
sp|Q6PCB0|VWA1_HUMAN	Q6PCB0			46A-HBVP	5.05204	0.178992	28.2249	9	4.27782e-10	4.84819e-09	NA	0.390625	0.390625
sp|O00468|AGRIN_HUMAN	O00468			46A-HBVP	3.17874	0.165195	19.2423	11	8.08448e-10	7.85349e-09	NA	0.275722	0.275722
sp|Q9GZM7|TINAL_HUMAN	Q9GZM7			46A-HBVP	6.90519	0.326702	21.136	10	1.24966e-09	1.06221e-08	NA	0.497321	0.48125
sp|Q14112|NID2_HUMAN	Q14112			46A-HBVP	3.36206	0.144585	23.2531	9	2.3945e-09	1.80918e-08	NA	0.116705	0.105263
sp|P08493|MGP_HUMAN	P08493			46A-HBVP	3.3364	0.147352	22.6425	9	3.03136e-09	2.06133e-08	NA	0.0625	0.0625
sp|P07585|PGS2_HUMAN	P07585			46A-HBVP	-4.8873	0.186116	-26.2594	8	4.75234e-09	2.93781e-08	NA	0.464286	0.0892857
sp|P11047|LAMC1_HUMAN	P11047			46A-HBVP	2.98711	0.204406	14.6136	12	5.2359e-09	2.96701e-08	NA	0.172741	0.162474
sp|P02751|FINC_HUMAN	P02751			46A-HBVP	1.68082	0.116959	14.371	12	6.33668e-09	3.31457e-08	NA	0.0761893	0.0576065
sp|Q16610|ECM1_HUMAN	Q16610			46A-HBVP	2.40844	0.154671	15.5714	11	7.68433e-09	3.73239e-08	NA	0.359375	0.359375
sp|Q99715|COCA1_HUMAN	Q99715			46A-HBVP	-2.24519	0.161644	-13.8897	12	9.33313e-09	4.18535e-08	NA	0.133119	0.13092
sp|O15230|LAMA5_HUMAN	O15230			46A-HBVP	5.02865	0.363758	13.8242	12	9.84787e-09	4.18535e-08	NA	0.371554	0.366228
sp|P98160|PGBM_HUMAN	P98160			46A-HBVP	2.96567	0.23902	12.4076	12	3.33007e-08	1.33203e-07	NA	0.203268	0.191611
sp|P07942|LAMB1_HUMAN	P07942			46A-HBVP	2.03585	0.169384	12.0191	12	4.75078e-08	1.79474e-07	NA	0.178309	0.166667
sp|P21810|PGS1_HUMAN	P21810			46A-HBVP	-1.76091	0.10869	-16.2011	9	5.7683e-08	2.06445e-07	NA	0.3	0.3
sp|Q16363|LAMA4_HUMAN	Q16363			46A-HBVP	2.10148	0.133142	15.7838	9	7.24269e-08	2.46251e-07	NA	0.179668	0.172297
sp|O00622|CCN1_HUMAN	O00622			46A-HBVP	3.22111	0.243784	13.213	10	1.17539e-07	3.69929e-07	NA	0.381667	0.381667
sp|Q9BXX0|EMIL2_HUMAN	Q9BXX0			46A-HBVP	2.35135	0.178997	13.1363	10	1.24226e-07	3.69929e-07	NA	0.573864	0.323864
sp|P05997|CO5A2_HUMAN	P05997			46A-HBVP	2.454	0.205956	11.9152	11	1.25123e-07	3.69929e-07	NA	0.0909091	0.0909091
sp|P23142|FBLN1_HUMAN	P23142			46A-HBVP	-1.47756	0.111413	-13.262	9	3.27107e-07	9.26802e-07	NA	0.0906863	0.0808824
sp|P20908|CO5A1_HUMAN	P20908			46A-HBVP	3.29752	0.28641	11.5133	10	4.30796e-07	1.17177e-06	NA	0.351124	0.351124
sp|P22692|IBP4_HUMAN	P22692			46A-HBVP	2.33485	0.177325	13.1671	8	1.05378e-06	2.75603e-06	NA	0.4375	0.263889
sp|P08572|CO4A2_HUMAN	P08572			46A-HBVP	3.7703	0.349075	10.8009	9	1.87777e-06	4.72921e-06	NA	0.243371	0.243371
sp|P02461|CO3A1_HUMAN	P02461			46A-HBVP	1.9658	0.204446	9.61526	9	4.95529e-06	1.18127e-05	NA	0.0922619	0.0922619
sp|P02462|CO4A1_HUMAN	P02462			46A-HBVP	4.15119	0.432592	9.59609	9	5.03778e-06	1.18127e-05	NA	0.15625	0.15625
sp|P22105|TENX_HUMAN	P22105			46A-HBVP	3.27694	0.248967	13.1621	6	1.18719e-05	2.69095e-05	NA	0.53227	0.28227
sp|P02452|CO1A1_HUMAN	P02452			46A-HBVP	1.40774	0.202781	6.94215	12	1.55573e-05	3.41256e-05	NA	0.19	0.19
sp|Q9Y6C2|EMIL1_HUMAN	Q9Y6C2			46A-HBVP	-2.00357	0.246079	-8.14196	9	1.92276e-05	3.96443e-05	NA	0.169725	0.165138
sp|Q8IUX7|AEBP1_HUMAN	Q8IUX7			46A-HBVP	-2.92457	0.186634	-15.6701	5	1.92391e-05	3.96443e-05	NA	0.482143	0.0892857
sp|O00339|MATN2_HUMAN	O00339			46A-HBVP	1.36935	0.203756	6.72055	12	2.13214e-05	4.26429e-05	NA	0.328125	0.328125
sp|Q08431|MFGM_HUMAN	Q08431			46A-HBVP	0.570572	0.0864724	6.59832	12	2.54398e-05	4.94259e-05	NA	0.285714	0.285714
sp|Q15063|POSTN_HUMAN	Q15063			46A-HBVP	1.78779	0.156852	11.3979	6	2.73428e-05	5.16475e-05	NA	0.291667	0.291667
sp|O94813|SLIT2_HUMAN	O94813			46A-HBVP	-3.01622	0.362649	-8.31719	7	7.10509e-05	0.00013058	NA	0.538462	0.288462
sp|Q14766|LTBP1_HUMAN	Q14766			46A-HBVP	1.29299	0.213645	6.05206	9	0.000190009	0.000340016	NA	0.27027	0.256757
sp|P24043|LAMA2_HUMAN	P24043			46A-HBVP	2.30135	0.359288	6.40531	8	0.000207952	0.000362583	NA	0.607906	0.475427
sp|O95967|FBLN4_HUMAN	O95967			46A-HBVP	-0.960221	0.162547	-5.90735	9	0.000226994	0.000385889	NA	0.148438	0.148438
sp|P39059|COFA1_HUMAN	P39059			46A-HBVP	1.09251	0.146291	7.46807	6	0.000297453	0.000493336	NA	0.0717905	0.0650338
sp|P09486|SPRC_HUMAN	P09486			46A-HBVP	-2.09739	0.423446	-4.95314	12	0.000334611	0.000541751	NA	0.494048	0.494048
sp|Q02388|CO7A1_HUMAN	Q02388			46A-HBVP	2.30058	0.454073	5.06655	11	0.000362542	0.000573323	NA	0.455247	0.455247
sp|P35442|TSP2_HUMAN	P35442			46A-HBVP	1.59514	0.291577	5.47075	9	0.000394875	0.000610261	NA	0.505556	0.505556
sp|Q6ZMP0|THSD4_HUMAN	Q6ZMP0			46A-HBVP	0.894869	0.184749	4.8437	11	0.000515934	0.000779633	NA	0.260504	0.260504
sp|Q15582|BGH3_HUMAN	Q15582			46A-HBVP	0.763416	0.173475	4.40073	12	0.000864281	0.00127763	NA	0.137555	0.117904
sp|P13611|CSPG2_HUMAN	P13611			46A-HBVP	-1.13521	0.267522	-4.24345	12	0.00114046	0.00165003	NA	0.165698	0.148256
sp|Q9NR99|MXRA5_HUMAN	Q9NR99			46A-HBVP	-0.836091	0.176923	-4.72573	8	0.00149111	0.00211241	NA	0.338315	0.338315
sp|P08123|CO1A2_HUMAN	P08123			46A-HBVP	0.918965	0.226988	4.04852	12	0.00161461	0.00224069	NA	0.0975877	0.0975877
sp|P27658|CO8A1_HUMAN	P27658			46A-HBVP	1.50051	0.341754	4.39062	9	0.00174397	0.00237181	NA	0.282407	0.282407
sp|O60687|SRPX2_HUMAN	O60687			46A-HBVP	1.31458	0.271332	4.84491	7	0.0018672	0.0024896	NA	0.541667	0.291667
sp|Q8N2S1|LTBP4_HUMAN	Q8N2S1			46A-HBVP	-1.035	0.137546	-7.52478	3	0.00486457	0.00636136	NA	0.510776	0.125
sp|P29279|CCN2_HUMAN	P29279			46A-HBVP	0.896042	0.251241	3.56647	9	0.00605765	0.00777208	NA	0.5	0.5
sp|P07996|TSP1_HUMAN	P07996			46A-HBVP	-1.00686	0.25973	-3.87654	6	0.00820344	0.0103303	NA	0.0520833	0.0520833
sp|P35555|FBN1_HUMAN	P35555			46A-HBVP	-1.7929	0.655061	-2.73699	12	0.0180315	0.0222935	NA	0.540138	0.540138
sp|P24593|IBP5_HUMAN	P24593			46A-HBVP	-1.24777	0.217432	-5.73868	2	0.0290486	0.0352733	NA	0.5	0
sp|Q96CG8|CTHR1_HUMAN	Q96CG8			46A-HBVP	0.598498	0.27713	2.15963	9	0.0591033	0.0705091	NA	0.325	0.325
sp|P12110|CO6A2_HUMAN	P12110			46A-HBVP	0.28947	0.147076	1.96817	12	0.07259	0.0851056	NA	0.165773	0.142167
sp|Q8TER0|SNED1_HUMAN	Q8TER0			46A-HBVP	-0.276382	0.149929	-1.84342	7	0.107803	0.124247	NA	0	0
sp|Q6UXH1|CREL2_HUMAN	Q6UXH1			46A-HBVP	-0.627217	0.341038	-1.83914	6	0.115516	0.130918	NA	0.6	0.225
sp|Q96HD1|CREL1_HUMAN	Q96HD1			46A-HBVP	-0.248625	0.180268	-1.37919	4	0.239929	0.267462	NA	0.375	0
sp|P12111|CO6A3_HUMAN	P12111			46A-HBVP	0.172658	0.146715	1.17683	12	0.262081	0.287443	NA	0.141625	0.121765
sp|P12109|CO6A1_HUMAN	P12109			46A-HBVP	-0.167234	0.157637	-1.06088	12	0.309629	0.334203	NA	0.188202	0.170295
sp|P78539|SRPX_HUMAN	P78539			46A-HBVP	-0.130751	0.13421	-0.974231	4	0.385107	0.409176	NA	0.5625	0.3125
sp|P35556|FBN2_HUMAN	P35556			46A-HBVP	-1.55437	1.64198	-0.946645	3	0.413658	0.43275	NA	0.552419	0.177419
sp|Q07092|COGA1_HUMAN	Q07092			46A-HBVP	-0.211314	0.268338	-0.787493	9	0.451234	0.464907	NA	0.283333	0.25
sp|P24821|TENA_HUMAN	P24821			46A-HBVP	-0.207961	0.385255	-0.539801	10	0.601147	0.610119	NA	0.168677	0.155366
sp|Q14767|LTBP2_HUMAN	Q14767			46A-HBVP	-0.0787044	0.261236	-0.301277	9	0.770048	0.770048	NA	0.597222	0.597222
sp|O00534|VMA5A_HUMAN	O00534			46A-HBVP	-Inf	NA	NA	NA	NA	0	oneConditionMissing	0.5	0
sp|O43854|EDIL3_HUMAN	O43854			46A-HBVP	Inf	NA	NA	NA	NA	0	oneConditionMissing	0.560096	0.0600962
sp|O95428|PPN_HUMAN	O95428			46A-HBVP	Inf	NA	NA	NA	NA	0	oneConditionMissing	0.931818	0.0568182
sp|P12107|COBA1_HUMAN	P12107			46A-HBVP	Inf	NA	NA	NA	NA	0	oneConditionMissing	0.58	0.08
sp|P18065|IBP2_HUMAN	P18065			46A-HBVP	NA	NA	NA	NA	NA	NA	completeMissing	NA	NA
sp|P25940|CO5A3_HUMAN	P25940			46A-HBVP	Inf	NA	NA	NA	NA	0	oneConditionMissing	NA	NA
sp|Q05707|COEA1_HUMAN	Q05707			46A-HBVP	-Inf	NA	NA	NA	NA	0	oneConditionMissing	0.552434	0.0505618
sp|Q12805|FBLN3_HUMAN	Q12805			46A-HBVP	-Inf	NA	NA	NA	NA	0	oneConditionMissing	NA	NA
sp|Q15113|PCOC1_HUMAN	Q15113			46A-HBVP	-Inf	NA	NA	NA	NA	0	oneConditionMissing	0.5	0
sp|Q16270|IBP7_HUMAN	Q16270			46A-HBVP	Inf	NA	NA	NA	NA	0	oneConditionMissing	0.505	0.00166667
sp|Q16787|LAMA3_HUMAN	Q16787			46A-HBVP	Inf	NA	NA	NA	NA	0	oneConditionMissing	0.5	0
sp|Q7Z7G0|TARSH_HUMAN	Q7Z7G0			46A-HBVP	Inf	NA	NA	NA	NA	0	oneConditionMissing	0.567708	0.0677083
sp|Q9HB63|NET4_HUMAN	Q9HB63			46A-HBVP	Inf	NA	NA	NA	NA	0	oneConditionMissing	NA	NA
sp|Q9UBX5|FBLN5_HUMAN	Q9UBX5			46A-HBVP	-Inf	NA	NA	NA	NA	0	oneConditionMissing	0.536058	0.0264423
sp|P02751|FINC_HUMAN	P02751			46A-U87	6.0823	0.116959	52.0037	12	1.77636e-15	7.81597e-14	NA	0.238355	0.223736
sp|Q08431|MFGM_HUMAN	Q08431			46A-U87	3.51606	0.0864724	40.6611	12	3.15303e-14	6.93667e-13	NA	0.535714	0.535714
sp|P11047|LAMC1_HUMAN	P11047			46A-U87	7.22378	0.204406	35.3404	12	1.6831e-13	2.22267e-12	NA	0.491016	0.480749
sp|P55268|LAMB2_HUMAN	P55268			46A-U87	7.49425	0.215336	34.8026	12	2.02061e-13	2.22267e-12	NA	0.502075	0.497925
sp|Q92626|PXDN_HUMAN	Q92626			46A-U87	5.59197	0.120658	46.3456	10	5.26912e-13	4.63682e-12	NA	0.525787	0.26792
sp|P07942|LAMB1_HUMAN	P07942			46A-U87	5.24405	0.169384	30.9595	12	8.10463e-13	5.94339e-12	NA	0.5144	0.505208
sp|O00468|AGRIN_HUMAN	O00468			46A-U87	5.80187	0.178431	32.5161	11	2.77423e-12	1.56417e-11	NA	0.508123	0.38222
sp|Q99715|COCA1_HUMAN	Q99715			46A-U87	4.5013	0.161644	27.847	12	2.84395e-12	1.56417e-11	NA	0.60318	0.601319
sp|P98160|PGBM_HUMAN	P98160			46A-U87	6.58909	0.23902	27.5671	12	3.20477e-12	1.56678e-11	NA	0.524771	0.513114
sp|P02452|CO1A1_HUMAN	P02452			46A-U87	5.44706	0.202781	26.8618	12	4.35385e-12	1.91569e-11	NA	0.362	0.362
sp|P08123|CO1A2_HUMAN	P08123			46A-U87	4.93087	0.226988	21.723	12	5.30376e-11	2.1215e-10	NA	0.413377	0.413377
sp|P05997|CO5A2_HUMAN	P05997			46A-U87	5.44925	0.222458	24.4957	11	6.01181e-11	2.20433e-10	NA	0.465909	0.340909
sp|P98095|FBLN2_HUMAN	P98095			46A-U87	5.35541	0.157837	33.9301	9	8.27509e-11	2.8008e-10	NA	0.522871	0.143927
sp|O15230|LAMA5_HUMAN	O15230			46A-U87	7.32462	0.363758	20.136	12	1.28868e-10	4.05015e-10	NA	0.511591	0.506266
sp|Q16610|ECM1_HUMAN	Q16610			46A-U87	3.19112	0.167064	19.1012	11	8.7474e-10	2.5659e-09	NA	0.46875	0.34375
sp|Q14112|NID2_HUMAN	Q14112			46A-U87	5.78645	0.22861	25.3115	9	1.12778e-09	3.10139e-09	NA	0.51373	0.131579
sp|Q16363|LAMA4_HUMAN	Q16363			46A-U87	5.27099	0.210515	25.0385	9	1.24186e-09	3.21421e-09	NA	0.536548	0.156941
sp|P12110|CO6A2_HUMAN	P12110			46A-U87	2.18295	0.147076	14.8423	12	4.38534e-09	1.05644e-08	NA	0.184013	0.168455
sp|P12111|CO6A3_HUMAN	P12111			46A-U87	2.17008	0.146715	14.7911	12	4.56192e-09	1.05644e-08	NA	0.192757	0.172538
sp|Q9GZM7|TINAL_HUMAN	Q9GZM7			46A-U87	6.99085	0.400127	17.4716	10	8.00946e-09	1.76208e-08	NA	0.51875	0.263393
sp|Q6ZMP0|THSD4_HUMAN	Q6ZMP0			46A-U87	2.75056	0.199552	13.7837	11	2.76629e-08	5.79604e-08	NA	0.569328	0.444328
sp|Q9BXX0|EMIL2_HUMAN	Q9BXX0			46A-U87	2.15622	0.14615	14.7535	10	4.09947e-08	8.19893e-08	NA	0.522727	0.522727
sp|P12109|CO6A1_HUMAN	P12109			46A-U87	1.9004	0.157637	12.0555	12	4.59332e-08	8.78723e-08	NA	0.250702	0.232093
sp|P13611|CSPG2_HUMAN	P13611			46A-U87	3.07517	0.267522	11.4951	12	7.79575e-08	1.42922e-07	NA	0.455426	0.437984
sp|Q7Z7G0|TARSH_HUMAN	Q7Z7G0			46A-U87	2.60758	0.119683	21.7874	7	1.08281e-07	1.89097e-07	NA	0.515625	0.265625
sp|O00339|MATN2_HUMAN	O00339			46A-U87	2.26706	0.203756	11.1264	12	1.11739e-07	1.89097e-07	NA	0.421875	0.421875
sp|O00622|CCN1_HUMAN	O00622			46A-U87	3.9503	0.298573	13.2306	10	1.1606e-07	1.89134e-07	NA	0.491667	0.241667
sp|P20908|CO5A1_HUMAN	P20908			46A-U87	4.56077	0.350779	13.0018	10	1.36969e-07	2.15237e-07	NA	0.525281	0.275281
sp|Q14766|LTBP1_HUMAN	Q14766			46A-U87	4.38897	0.337802	12.9927	9	3.90167e-07	5.91978e-07	NA	0.559966	0.17652
sp|O43854|EDIL3_HUMAN	O43854			46A-U87	2.04001	0.157829	12.9254	8	1.21479e-06	1.78169e-06	NA	0.411058	0.411058
sp|P08572|CO4A2_HUMAN	P08572			46A-U87	6.05365	0.551936	10.968	9	1.64991e-06	2.34181e-06	NA	0.49053	0.11553
sp|P27658|CO8A1_HUMAN	P27658			46A-U87	4.08916	0.54036	7.56747	9	3.44117e-05	4.61046e-05	NA	0.532407	0.157407
sp|P07585|PGS2_HUMAN	P07585			46A-U87	-1.58828	0.19222	-8.26279	8	3.45784e-05	4.61046e-05	NA	0.863095	0.363095
sp|Q02388|CO7A1_HUMAN	Q02388			46A-U87	3.25222	0.490454	6.63102	11	3.70491e-05	4.79458e-05	NA	0.544753	0.419753
sp|P22105|TENX_HUMAN	P22105			46A-U87	3.43136	0.321416	10.6758	6	3.98453e-05	5.00912e-05	NA	0.535979	0.160979
sp|Q15582|BGH3_HUMAN	Q15582			46A-U87	1.04627	0.173475	6.03126	12	5.92599e-05	7.24288e-05	NA	0.161572	0.146288
sp|Q9Y6C2|EMIL1_HUMAN	Q9Y6C2			46A-U87	2.69968	0.389086	6.93852	9	6.77033e-05	8.0512e-05	NA	0.647936	0.270069
sp|P35442|TSP2_HUMAN	P35442			46A-U87	1.53	0.461023	3.31871	9	0.00895869	0.0103732	NA	0.65	0.275
sp|P09486|SPRC_HUMAN	P09486			46A-U87	1.08003	0.423446	2.55057	12	0.0254391	0.0287005	NA	0.789683	0.789683
sp|P24821|TENA_HUMAN	P24821			46A-U87	-0.601554	0.385255	-1.56144	10	0.149482	0.16443	NA	0.1797	0.165349
sp|O94813|SLIT2_HUMAN	O94813			46A-U87	-0.500267	0.362649	-1.37948	7	0.210202	0.225583	NA	0.903846	0.653846
sp|P35555|FBN1_HUMAN	P35555			46A-U87	-0.69863	0.655061	-1.06651	12	0.30718	0.321808	NA	0.606651	0.606651
sp|Q6UXH1|CREL2_HUMAN	Q6UXH1			46A-U87	0.259288	0.431383	0.601062	6	0.569794	0.583045	NA	0.9	0.15
sp|Q96HD1|CREL1_HUMAN	Q96HD1			46A-U87	0.0305808	0.197474	0.15486	4	0.884432	0.884432	NA	0.5	0
sp|O00534|VMA5A_HUMAN	O00534			46A-U87	-Inf	NA	NA	NA	NA	0	oneConditionMissing	0.875	0
sp|O60687|SRPX2_HUMAN	O60687			46A-U87	Inf	NA	NA	NA	NA	0	oneConditionMissing	0.625	0.125
sp|O95428|PPN_HUMAN	O95428			46A-U87	Inf	NA	NA	NA	NA	0	oneConditionMissing	0.931818	0.0568182
sp|O95967|FBLN4_HUMAN	O95967			46A-U87	Inf	NA	NA	NA	NA	0	oneConditionMissing	0.59375	0.09375
sp|P02461|CO3A1_HUMAN	P02461			46A-U87	Inf	NA	NA	NA	NA	0	oneConditionMissing	0.5	0
sp|P02462|CO4A1_HUMAN	P02462			46A-U87	Inf	NA	NA	NA	NA	0	oneConditionMissing	0.5	0
sp|P07996|TSP1_HUMAN	P07996			46A-U87	Inf	NA	NA	NA	NA	0	oneConditionMissing	0.552083	0.0520833
sp|P08493|MGP_HUMAN	P08493			46A-U87	Inf	NA	NA	NA	NA	0	oneConditionMissing	0.5	0
sp|P12107|COBA1_HUMAN	P12107			46A-U87	Inf	NA	NA	NA	NA	0	oneConditionMissing	0.58	0.08
sp|P14543|NID1_HUMAN	P14543			46A-U87	Inf	NA	NA	NA	NA	0	oneConditionMissing	0.514273	0.0125433
sp|P18065|IBP2_HUMAN	P18065			46A-U87	NA	NA	NA	NA	NA	NA	completeMissing	NA	NA
sp|P21810|PGS1_HUMAN	P21810			46A-U87	Inf	NA	NA	NA	NA	0	oneConditionMissing	0.75	0.25
sp|P22692|IBP4_HUMAN	P22692			46A-U87	Inf	NA	NA	NA	NA	0	oneConditionMissing	0.5625	0.0347222
sp|P23142|FBLN1_HUMAN	P23142			46A-U87	Inf	NA	NA	NA	NA	0	oneConditionMissing	0.583333	0.0784314
sp|P24043|LAMA2_HUMAN	P24043			46A-U87	Inf	NA	NA	NA	NA	0	oneConditionMissing	0.657051	0.152778
sp|P24593|IBP5_HUMAN	P24593			46A-U87	Inf	NA	NA	NA	NA	0	oneConditionMissing	0.75	0
sp|P25940|CO5A3_HUMAN	P25940			46A-U87	Inf	NA	NA	NA	NA	0	oneConditionMissing	NA	NA
sp|P29279|CCN2_HUMAN	P29279			46A-U87	Inf	NA	NA	NA	NA	0	oneConditionMissing	0.708333	0.208333
sp|P35556|FBN2_HUMAN	P35556			46A-U87	Inf	NA	NA	NA	NA	0	oneConditionMissing	0.987903	0.112903
sp|P39059|COFA1_HUMAN	P39059			46A-U87	Inf	NA	NA	NA	NA	0	oneConditionMissing	0.526182	0.0228041
sp|P39060|COIA1_HUMAN	P39060			46A-U87	Inf	NA	NA	NA	NA	0	oneConditionMissing	0.536184	0.0335526
sp|P78539|SRPX_HUMAN	P78539			46A-U87	Inf	NA	NA	NA	NA	0	oneConditionMissing	0.6875	0.1875
sp|Q05707|COEA1_HUMAN	Q05707			46A-U87	-Inf	NA	NA	NA	NA	0	oneConditionMissing	0.991573	0.240637
sp|Q07092|COGA1_HUMAN	Q07092			46A-U87	Inf	NA	NA	NA	NA	0	oneConditionMissing	0.616667	0.1
sp|Q12805|FBLN3_HUMAN	Q12805			46A-U87	NA	NA	NA	NA	NA	NA	completeMissing	NA	NA
sp|Q14767|LTBP2_HUMAN	Q14767			46A-U87	Inf	NA	NA	NA	NA	0	oneConditionMissing	0.791667	0.291667
sp|Q15063|POSTN_HUMAN	Q15063			46A-U87	Inf	NA	NA	NA	NA	0	oneConditionMissing	0.5	0
sp|Q15113|PCOC1_HUMAN	Q15113			46A-U87	-Inf	NA	NA	NA	NA	0	oneConditionMissing	0.625	0
sp|Q16270|IBP7_HUMAN	Q16270			46A-U87	Inf	NA	NA	NA	NA	0	oneConditionMissing	0.505	0.00166667
sp|Q16787|LAMA3_HUMAN	Q16787			46A-U87	Inf	NA	NA	NA	NA	0	oneConditionMissing	0.5	0
sp|Q6PCB0|VWA1_HUMAN	Q6PCB0			46A-U87	Inf	NA	NA	NA	NA	0	oneConditionMissing	0.534375	0.034375
sp|Q8IUX7|AEBP1_HUMAN	Q8IUX7			46A-U87	Inf	NA	NA	NA	NA	0	oneConditionMissing	0.964286	0.0714286
sp|Q8N2S1|LTBP4_HUMAN	Q8N2S1			46A-U87	Inf	NA	NA	NA	NA	0	oneConditionMissing	0.997845	0.112069
sp|Q8TER0|SNED1_HUMAN	Q8TER0			46A-U87	Inf	NA	NA	NA	NA	0	oneConditionMissing	0.5	0
sp|Q96CG8|CTHR1_HUMAN	Q96CG8			46A-U87	Inf	NA	NA	NA	NA	0	oneConditionMissing	0.6	0.1
sp|Q9HB63|NET4_HUMAN	Q9HB63			46A-U87	Inf	NA	NA	NA	NA	0	oneConditionMissing	NA	NA
sp|Q9NR99|MXRA5_HUMAN	Q9NR99			46A-U87	Inf	NA	NA	NA	NA	0	oneConditionMissing	0.732337	0.232337
sp|Q9UBX5|FBLN5_HUMAN	Q9UBX5			46A-U87	-Inf	NA	NA	NA	NA	0	oneConditionMissing	0.987981	0.110577
sp|Q99715|COCA1_HUMAN	Q99715			80A-HBVP	-5.28466	0.161644	-32.6932	12	4.24549e-13	2.71712e-11	NA	0.419147	0.416949
sp|P07585|PGS2_HUMAN	P07585			80A-HBVP	-5.78303	0.11771	-49.1293	8	3.26077e-11	1.04345e-09	NA	0.428571	0.428571
sp|Q08431|MFGM_HUMAN	Q08431			80A-HBVP	1.58387	0.0864724	18.3165	12	3.88377e-10	8.28538e-09	NA	0.178571	0.178571
sp|P23142|FBLN1_HUMAN	P23142			80A-HBVP	-2.78784	0.111413	-25.0225	9	1.24892e-09	1.99827e-08	NA	0.0318627	0.0220588
sp|P13611|CSPG2_HUMAN	P13611			80A-HBVP	-4.33842	0.267522	-16.2171	12	1.58761e-09	2.03213e-08	NA	0.392442	0.38469
sp|P98095|FBLN2_HUMAN	P98095			80A-HBVP	2.2501	0.0998246	22.5405	9	3.15495e-09	3.36528e-08	NA	0.19795	0.19164
sp|O95967|FBLN4_HUMAN	O95967			80A-HBVP	-3.51309	0.162547	-21.6128	9	4.57677e-09	4.18448e-08	NA	0.355469	0.355469
sp|P55268|LAMB2_HUMAN	P55268			80A-HBVP	3.13598	0.215336	14.5632	12	5.44642e-09	4.35714e-08	NA	0.65223	0.645488
sp|Q6PCB0|VWA1_HUMAN	Q6PCB0			80A-HBVP	2.75055	0.178992	15.3668	9	9.14404e-08	6.40544e-07	NA	0.65	0.65
sp|P08493|MGP_HUMAN	P08493			80A-HBVP	-2.24093	0.147352	-15.208	9	1.00085e-07	6.40544e-07	NA	0.3125	0.3125
sp|Q9Y6C2|EMIL1_HUMAN	Q9Y6C2			80A-HBVP	-3.31005	0.246079	-13.4511	9	2.89577e-07	1.68481e-06	NA	0.267775	0.263188
sp|Q15113|PCOC1_HUMAN	Q15113			80A-HBVP	-1.88016	0.140703	-13.3626	8	9.40879e-07	4.92646e-06	NA	0	0
sp|P24821|TENA_HUMAN	P24821			80A-HBVP	-4.96173	0.47184	-10.5157	10	1.00069e-06	4.92646e-06	NA	0.561564	0.300125
sp|Q8IUX7|AEBP1_HUMAN	Q8IUX7			80A-HBVP	-3.30979	0.127495	-25.96	5	1.58452e-06	6.82226e-06	NA	0.446429	0.321429
sp|Q9BXX0|EMIL2_HUMAN	Q9BXX0			80A-HBVP	1.78881	0.178997	9.99356	10	1.59897e-06	6.82226e-06	NA	0.678977	0.428977
sp|P14543|NID1_HUMAN	P14543			80A-HBVP	1.48018	0.136544	10.8403	9	1.82103e-06	7.28414e-06	NA	0.429931	0.41955
sp|Q9NR99|MXRA5_HUMAN	Q9NR99			80A-HBVP	-2.16286	0.191099	-11.318	8	3.34423e-06	1.259e-05	NA	0.585598	0.460598
sp|Q9UBX5|FBLN5_HUMAN	Q9UBX5			80A-HBVP	-4.94685	0.257266	-19.2285	5	7.0157e-06	2.49447e-05	NA	0.492788	0.350962
sp|P07996|TSP1_HUMAN	P07996			80A-HBVP	-5.04349	0.410669	-12.2811	6	1.77573e-05	5.9814e-05	NA	0.4875	0.1125
sp|P98160|PGBM_HUMAN	P98160			80A-HBVP	1.58903	0.23902	6.64809	12	2.36689e-05	7.57406e-05	NA	0.249167	0.23751
sp|Q14767|LTBP2_HUMAN	Q14767			80A-HBVP	1.96366	0.261236	7.5168	9	3.62829e-05	0.000110576	NA	0.347222	0.347222
sp|Q92626|PXDN_HUMAN	Q92626			80A-HBVP	-0.682952	0.0985168	-6.93234	10	4.03261e-05	0.000117312	NA	0.468969	0.458479
sp|Q6ZMP0|THSD4_HUMAN	Q6ZMP0			80A-HBVP	1.18157	0.184749	6.39554	11	5.112e-05	0.000142247	NA	0.182773	0.182773
sp|P35442|TSP2_HUMAN	P35442			80A-HBVP	1.91074	0.291577	6.55313	9	0.000104792	0.000279444	NA	0.480556	0.480556
sp|O60687|SRPX2_HUMAN	O60687			80A-HBVP	1.97318	0.271332	7.27219	7	0.000166705	0.000426765	NA	0.458333	0.208333
sp|P24043|LAMA2_HUMAN	P24043			80A-HBVP	2.1924	0.359288	6.10206	8	0.000288813	0.000710925	NA	0.600427	0.467949
sp|Q16363|LAMA4_HUMAN	Q16363			80A-HBVP	0.723273	0.133142	5.43236	9	0.000415094	0.000983925	NA	0.262899	0.255528
sp|P27658|CO8A1_HUMAN	P27658			80A-HBVP	-1.77077	0.341754	-5.18141	9	0.000578259	0.00132174	NA	0.592593	0.592593
sp|Q15582|BGH3_HUMAN	Q15582			80A-HBVP	-0.732853	0.173475	-4.22455	12	0.00117934	0.00260269	NA	0.204148	0.164847
sp|P39060|COIA1_HUMAN	P39060			80A-HBVP	0.487885	0.115277	4.2323	9	0.00219913	0.00469148	NA	0.207895	0.198684
sp|Q16610|ECM1_HUMAN	Q16610			80A-HBVP	-0.6045	0.154671	-3.90829	11	0.00244149	0.0050405	NA	0.75	0.75
sp|P09486|SPRC_HUMAN	P09486			80A-HBVP	1.55578	0.423446	3.6741	12	0.00318302	0.00636603	NA	0.202381	0.202381
sp|P02751|FINC_HUMAN	P02751			80A-HBVP	0.393722	0.116959	3.36633	12	0.00560818	0.0108765	NA	0.0737116	0.0541378
sp|Q9GZM7|TINAL_HUMAN	Q9GZM7			80A-HBVP	1.07109	0.326702	3.2785	10	0.00830995	0.0156423	NA	0.878571	0.8625
sp|P05997|CO5A2_HUMAN	P05997			80A-HBVP	-0.637489	0.205956	-3.09527	11	0.0101897	0.0186326	NA	0.306818	0.306818
sp|Q96HD1|CREL1_HUMAN	Q96HD1			80A-HBVP	1.03459	0.228023	4.53719	4	0.0105195	0.0187014	NA	0.5	0
sp|P20908|CO5A1_HUMAN	P20908			80A-HBVP	0.865025	0.28641	3.02024	10	0.0128903	0.0222967	NA	0.494382	0.494382
sp|P29279|CCN2_HUMAN	P29279			80A-HBVP	0.766056	0.251241	3.04909	9	0.0138132	0.0232643	NA	0.458333	0.458333
sp|O00622|CCN1_HUMAN	O00622			80A-HBVP	0.694836	0.243784	2.85022	10	0.0172437	0.0278385	NA	0.646667	0.646667
sp|P02461|CO3A1_HUMAN	P02461			80A-HBVP	-0.594302	0.204446	-2.90689	9	0.0173991	0.0278385	NA	0.342262	0.342262
sp|Q14766|LTBP1_HUMAN	Q14766			80A-HBVP	-0.597874	0.213645	-2.79845	9	0.0207652	0.032414	NA	0.494088	0.480574
sp|P12110|CO6A2_HUMAN	P12110			80A-HBVP	0.352701	0.147076	2.39809	12	0.0336358	0.0512546	NA	0.126609	0.0987124
sp|P08572|CO4A2_HUMAN	P08572			80A-HBVP	0.857889	0.349075	2.45761	9	0.0363008	0.0540291	NA	0.410985	0.410985
sp|O15230|LAMA5_HUMAN	O15230			80A-HBVP	0.823326	0.363758	2.26339	12	0.0429474	0.0618484	NA	0.629073	0.62406
sp|Q07092|COGA1_HUMAN	Q07092			80A-HBVP	-0.629908	0.268338	-2.34744	9	0.0434871	0.0618484	NA	0.4	0.366667
sp|O00339|MATN2_HUMAN	O00339			80A-HBVP	-0.435506	0.203756	-2.13739	12	0.0538412	0.0749095	NA	0.59375	0.59375
sp|P11047|LAMC1_HUMAN	P11047			80A-HBVP	0.403093	0.204406	1.97202	12	0.0721025	0.0981821	NA	0.238193	0.227926
sp|P22105|TENX_HUMAN	P22105			80A-HBVP	0.491123	0.262435	1.87141	6	0.110462	0.145109	NA	0.958457	0.583457
sp|P78539|SRPX_HUMAN	P78539			80A-HBVP	-0.386961	0.189801	-2.03877	4	0.111099	0.145109	NA	0.8125	0.1875
sp|P22692|IBP4_HUMAN	P22692			80A-HBVP	0.250553	0.177325	1.41296	8	0.19537	0.250074	NA	0.666667	0.493056
sp|P21810|PGS1_HUMAN	P21810			80A-HBVP	-0.130255	0.10869	-1.1984	9	0.261363	0.327985	NA	0.075	0.075
sp|O00468|AGRIN_HUMAN	O00468			80A-HBVP	0.186376	0.165195	1.12822	11	0.283234	0.348596	NA	0.512635	0.512635
sp|P12109|CO6A1_HUMAN	P12109			80A-HBVP	0.172807	0.157637	1.09623	12	0.294489	0.35561	NA	0.10639	0.0867275
sp|Q8TER0|SNED1_HUMAN	Q8TER0			80A-HBVP	0.191039	0.183624	1.04038	7	0.332757	0.394379	NA	0.25	0
sp|P12111|CO6A3_HUMAN	P12111			80A-HBVP	0.142098	0.146715	0.968535	12	0.351894	0.409476	NA	0.118889	0.0978613
sp|Q14112|NID2_HUMAN	Q14112			80A-HBVP	0.129267	0.144585	0.894052	9	0.394574	0.450941	NA	0.200229	0.188787
sp|P08123|CO1A2_HUMAN	P08123			80A-HBVP	0.195694	0.226988	0.862132	12	0.405514	0.455315	NA	0.118421	0.118421
sp|P02452|CO1A1_HUMAN	P02452			80A-HBVP	-0.137029	0.202781	-0.67575	12	0.512012	0.564979	NA	0.254	0.254
sp|Q96CG8|CTHR1_HUMAN	Q96CG8			80A-HBVP	0.182455	0.27713	0.658373	9	0.52678	0.571422	NA	0.375	0.375
sp|P07942|LAMB1_HUMAN	P07942			80A-HBVP	-0.0987659	0.169384	-0.583088	12	0.57063	0.608672	NA	0.244179	0.226716
sp|P35555|FBN1_HUMAN	P35555			80A-HBVP	-0.366354	0.655061	-0.559267	12	0.586266	0.615099	NA	0.333716	0.333716
sp|Q6UXH1|CREL2_HUMAN	Q6UXH1			80A-HBVP	0.0540057	0.215691	0.250384	6	0.810643	0.836793	NA	0.25	0.25
sp|P02462|CO4A1_HUMAN	P02462			80A-HBVP	0.0902746	0.432592	0.208683	9	0.839342	0.852665	NA	0.25	0.25
sp|Q02388|CO7A1_HUMAN	Q02388			80A-HBVP	0.00305393	0.454073	0.00672564	11	0.994754	0.994754	NA	0.780864	0.780864
sp|O00534|VMA5A_HUMAN	O00534			80A-HBVP	-Inf	NA	NA	NA	NA	0	oneConditionMissing	0.5	0
sp|O43854|EDIL3_HUMAN	O43854			80A-HBVP	Inf	NA	NA	NA	NA	0	oneConditionMissing	0.956731	0.331731
sp|O94813|SLIT2_HUMAN	O94813			80A-HBVP	-Inf	NA	NA	NA	NA	0	oneConditionMissing	0.583333	0.0833333
sp|O95428|PPN_HUMAN	O95428			80A-HBVP	Inf	NA	NA	NA	NA	0	oneConditionMissing	0.556818	0.0568182
sp|P12107|COBA1_HUMAN	P12107			80A-HBVP	Inf	NA	NA	NA	NA	0	oneConditionMissing	0.70125	0.20125
sp|P18065|IBP2_HUMAN	P18065			80A-HBVP	Inf	NA	NA	NA	NA	0	oneConditionMissing	NA	NA
sp|P24593|IBP5_HUMAN	P24593			80A-HBVP	-Inf	NA	NA	NA	NA	0	oneConditionMissing	0.75	0
sp|P25940|CO5A3_HUMAN	P25940			80A-HBVP	NA	NA	NA	NA	NA	NA	completeMissing	NA	NA
sp|P35556|FBN2_HUMAN	P35556			80A-HBVP	-Inf	NA	NA	NA	NA	0	oneConditionMissing	0.564516	0.0645161
sp|P39059|COFA1_HUMAN	P39059			80A-HBVP	-Inf	NA	NA	NA	NA	0	oneConditionMissing	0.545608	0.0422297
sp|Q05707|COEA1_HUMAN	Q05707			80A-HBVP	-Inf	NA	NA	NA	NA	0	oneConditionMissing	0.552434	0.0505618
sp|Q12805|FBLN3_HUMAN	Q12805			80A-HBVP	-Inf	NA	NA	NA	NA	0	oneConditionMissing	NA	NA
sp|Q15063|POSTN_HUMAN	Q15063			80A-HBVP	-Inf	NA	NA	NA	NA	0	oneConditionMissing	0.791667	0.291667
sp|Q16270|IBP7_HUMAN	Q16270			80A-HBVP	Inf	NA	NA	NA	NA	0	oneConditionMissing	0.623333	0.123333
sp|Q16787|LAMA3_HUMAN	Q16787			80A-HBVP	Inf	NA	NA	NA	NA	0	oneConditionMissing	0.5	0
sp|Q7Z7G0|TARSH_HUMAN	Q7Z7G0			80A-HBVP	Inf	NA	NA	NA	NA	0	oneConditionMissing	0.697917	0.197917
sp|Q8N2S1|LTBP4_HUMAN	Q8N2S1			80A-HBVP	-Inf	NA	NA	NA	NA	0	oneConditionMissing	0.512931	0.012931
sp|Q9HB63|NET4_HUMAN	Q9HB63			80A-HBVP	NA	NA	NA	NA	NA	NA	completeMissing	NA	NA
sp|Q08431|MFGM_HUMAN	Q08431			80A-U87	4.52936	0.0864724	52.3793	12	1.55431e-15	6.99441e-14	NA	0.428571	0.428571
sp|P02751|FINC_HUMAN	P02751			80A-U87	4.79521	0.116959	40.999	12	2.88658e-14	6.4948e-13	NA	0.235877	0.220268
sp|P11047|LAMC1_HUMAN	P11047			80A-U87	4.63977	0.204406	22.6988	12	3.16707e-11	4.7506e-10	NA	0.556468	0.546201
sp|P98160|PGBM_HUMAN	P98160			80A-U87	5.21245	0.23902	21.8076	12	5.06768e-11	5.70114e-10	NA	0.57067	0.559013
sp|P55268|LAMB2_HUMAN	P55268			80A-U87	4.60378	0.215336	21.3795	12	6.39313e-11	5.75382e-10	NA	0.669346	0.66416
sp|P02452|CO1A1_HUMAN	P02452			80A-U87	3.9023	0.202781	19.2439	12	2.18632e-10	1.63974e-09	NA	0.426	0.426
sp|P08123|CO1A2_HUMAN	P08123			80A-U87	4.2076	0.226988	18.5367	12	3.38025e-10	2.12892e-09	NA	0.434211	0.434211
sp|P07942|LAMB1_HUMAN	P07942			80A-U87	3.10943	0.169384	18.3572	12	3.78474e-10	2.12892e-09	NA	0.58027	0.565257
sp|P98095|FBLN2_HUMAN	P98095			80A-U87	4.11681	0.157837	26.0827	9	8.63657e-10	4.31829e-09	NA	0.520899	0.141956
sp|P12110|CO6A2_HUMAN	P12110			80A-U87	2.24618	0.147076	15.2723	12	3.16332e-09	1.4235e-08	NA	0.14485	0.125
sp|P12111|CO6A3_HUMAN	P12111			80A-U87	2.13952	0.146715	14.5828	12	5.36341e-09	2.19412e-08	NA	0.170022	0.148634
sp|Q92626|PXDN_HUMAN	Q92626			80A-U87	2.14326	0.120658	17.7631	10	6.8202e-09	2.31052e-08	NA	0.768357	0.51049
sp|O00468|AGRIN_HUMAN	O00468			80A-U87	2.80951	0.178431	15.7457	11	6.83184e-09	2.31052e-08	NA	0.745036	0.619134
sp|P12109|CO6A1_HUMAN	P12109			80A-U87	2.24044	0.157637	14.2127	12	7.1883e-09	2.31052e-08	NA	0.16889	0.148525
sp|Q6ZMP0|THSD4_HUMAN	Q6ZMP0			80A-U87	3.03726	0.199552	15.2204	11	9.77354e-09	2.93206e-08	NA	0.491597	0.366597
sp|Q16363|LAMA4_HUMAN	Q16363			80A-U87	3.89278	0.210515	18.4917	9	1.81101e-08	5.09347e-08	NA	0.619779	0.240172
sp|P07585|PGS2_HUMAN	P07585			80A-U87	-2.484	0.127142	-19.5373	8	4.89632e-08	1.29608e-07	NA	0.827381	0.702381
sp|P09486|SPRC_HUMAN	P09486			80A-U87	4.7332	0.423446	11.1778	12	1.06202e-07	2.65505e-07	NA	0.498016	0.498016
sp|P05997|CO5A2_HUMAN	P05997			80A-U87	2.35776	0.222458	10.5987	11	4.12277e-07	9.76445e-07	NA	0.681818	0.556818
sp|P24821|TENA_HUMAN	P24821			80A-U87	-5.35532	0.47184	-11.3499	10	4.92388e-07	1.10787e-06	NA	0.572587	0.310108
sp|Q7Z7G0|TARSH_HUMAN	Q7Z7G0			80A-U87	2.04198	0.119683	17.0616	7	5.82798e-07	1.24885e-06	NA	0.645833	0.395833
sp|Q9BXX0|EMIL2_HUMAN	Q9BXX0			80A-U87	1.59369	0.14615	10.9045	10	7.14908e-07	1.46231e-06	NA	0.627841	0.627841
sp|Q99715|COCA1_HUMAN	Q99715			80A-U87	1.46183	0.161644	9.04352	12	1.04922e-06	2.05283e-06	NA	0.889208	0.887348
sp|Q14112|NID2_HUMAN	Q14112			80A-U87	2.55366	0.22861	11.1704	9	1.41401e-06	2.65127e-06	NA	0.597254	0.215103
sp|O15230|LAMA5_HUMAN	O15230			80A-U87	3.1193	0.363758	8.57521	12	1.83419e-06	3.30154e-06	NA	0.76911	0.764098
sp|Q14766|LTBP1_HUMAN	Q14766			80A-U87	2.49811	0.337802	7.39518	9	4.12444e-05	7.13845e-05	NA	0.783784	0.400338
sp|P20908|CO5A1_HUMAN	P20908			80A-U87	2.12827	0.350779	6.06727	10	0.000120811	0.000201352	NA	0.668539	0.418539
sp|P08572|CO4A2_HUMAN	P08572			80A-U87	3.14124	0.551936	5.69131	9	0.000297566	0.000478232	NA	0.658144	0.283144
sp|O00622|CCN1_HUMAN	O00622			80A-U87	1.42403	0.298573	4.76944	10	0.000757683	0.00117572	NA	0.756667	0.506667
sp|O43854|EDIL3_HUMAN	O43854			80A-U87	-0.773641	0.170475	-4.53815	8	0.00190382	0.00285574	NA	0.807692	0.682692
sp|P35442|TSP2_HUMAN	P35442			80A-U87	1.8456	0.461023	4.00327	9	0.00309514	0.00449295	NA	0.625	0.25
sp|Q96HD1|CREL1_HUMAN	Q96HD1			80A-U87	1.31379	0.241855	5.43214	4	0.00557196	0.00783556	NA	0.625	0
sp|Q9Y6C2|EMIL1_HUMAN	Q9Y6C2			80A-U87	1.3932	0.389086	3.58071	9	0.00592419	0.00807844	NA	0.745986	0.368119
sp|Q9GZM7|TINAL_HUMAN	Q9GZM7			80A-U87	1.15675	0.400127	2.89096	10	0.0160806	0.0212831	NA	0.9	0.644643
sp|Q15582|BGH3_HUMAN	Q15582			80A-U87	-0.449998	0.173475	-2.59402	12	0.0234832	0.0301927	NA	0.228166	0.193231
sp|Q6UXH1|CREL2_HUMAN	Q6UXH1			80A-U87	0.940511	0.341038	2.75779	6	0.0329503	0.0411879	NA	0.55	0.175
sp|O00339|MATN2_HUMAN	O00339			80A-U87	0.462206	0.203756	2.26843	12	0.0425587	0.0517606	NA	0.6875	0.6875
sp|Q02388|CO7A1_HUMAN	Q02388			80A-U87	0.954689	0.490454	1.94654	11	0.0775733	0.0918631	NA	0.87037	0.74537
sp|Q15113|PCOC1_HUMAN	Q15113			80A-U87	0.294505	0.151977	1.93783	8	0.0886433	0.102281	NA	0.125	0
sp|P22105|TENX_HUMAN	P22105			80A-U87	0.64555	0.331957	1.94468	6	0.0997918	0.112266	NA	0.962166	0.462166
sp|P27658|CO8A1_HUMAN	P27658			80A-U87	0.817885	0.54036	1.51359	9	0.164426	0.180467	NA	0.842593	0.467593
sp|P35555|FBN1_HUMAN	P35555			80A-U87	0.727914	0.655061	1.11122	12	0.288244	0.308833	NA	0.400229	0.400229
sp|Q9UBX5|FBLN5_HUMAN	Q9UBX5			80A-U87	-0.450292	0.38895	-1.15771	5	0.299275	0.313195	NA	0.944712	0.435096
sp|Q16610|ECM1_HUMAN	Q16610			80A-U87	0.17818	0.167064	1.06654	11	0.30903	0.316054	NA	0.859375	0.734375
sp|P13611|CSPG2_HUMAN	P13611			80A-U87	-0.128033	0.267522	-0.47859	12	0.640832	0.640832	NA	0.682171	0.674419
sp|O00534|VMA5A_HUMAN	O00534			80A-U87	-Inf	NA	NA	NA	NA	0	oneConditionMissing	0.875	0
sp|O60687|SRPX2_HUMAN	O60687			80A-U87	Inf	NA	NA	NA	NA	0	oneConditionMissing	0.541667	0.0416667
sp|O94813|SLIT2_HUMAN	O94813			80A-U87	-Inf	NA	NA	NA	NA	0	oneConditionMissing	0.948718	0.448718
sp|O95428|PPN_HUMAN	O95428			80A-U87	Inf	NA	NA	NA	NA	0	oneConditionMissing	0.556818	0.0568182
sp|O95967|FBLN4_HUMAN	O95967			80A-U87	Inf	NA	NA	NA	NA	0	oneConditionMissing	0.800781	0.300781
sp|P02461|CO3A1_HUMAN	P02461			80A-U87	Inf	NA	NA	NA	NA	0	oneConditionMissing	0.75	0.25
sp|P02462|CO4A1_HUMAN	P02462			80A-U87	Inf	NA	NA	NA	NA	0	oneConditionMissing	0.59375	0.09375
sp|P07996|TSP1_HUMAN	P07996			80A-U87	Inf	NA	NA	NA	NA	0	oneConditionMissing	0.9875	0.1125
sp|P08493|MGP_HUMAN	P08493			80A-U87	Inf	NA	NA	NA	NA	0	oneConditionMissing	0.75	0.25
sp|P12107|COBA1_HUMAN	P12107			80A-U87	Inf	NA	NA	NA	NA	0	oneConditionMissing	0.70125	0.20125
sp|P14543|NID1_HUMAN	P14543			80A-U87	Inf	NA	NA	NA	NA	0	oneConditionMissing	0.666522	0.157872
sp|P18065|IBP2_HUMAN	P18065			80A-U87	Inf	NA	NA	NA	NA	0	oneConditionMissing	NA	NA
sp|P21810|PGS1_HUMAN	P21810			80A-U87	Inf	NA	NA	NA	NA	0	oneConditionMissing	0.525	0.025
sp|P22692|IBP4_HUMAN	P22692			80A-U87	Inf	NA	NA	NA	NA	0	oneConditionMissing	0.791667	0.263889
sp|P23142|FBLN1_HUMAN	P23142			80A-U87	Inf	NA	NA	NA	NA	0	oneConditionMissing	0.52451	0.0196078
sp|P24043|LAMA2_HUMAN	P24043			80A-U87	Inf	NA	NA	NA	NA	0	oneConditionMissing	0.649573	0.145299
sp|P24593|IBP5_HUMAN	P24593			80A-U87	NA	NA	NA	NA	NA	NA	completeMissing	1	0
sp|P25940|CO5A3_HUMAN	P25940			80A-U87	NA	NA	NA	NA	NA	NA	completeMissing	NA	NA
sp|P29279|CCN2_HUMAN	P29279			80A-U87	Inf	NA	NA	NA	NA	0	oneConditionMissing	0.666667	0.166667
sp|P35556|FBN2_HUMAN	P35556			80A-U87	NA	NA	NA	NA	NA	NA	completeMissing	1	0
sp|P39059|COFA1_HUMAN	P39059			80A-U87	NA	NA	NA	NA	NA	NA	completeMissing	1	0
sp|P39060|COIA1_HUMAN	P39060			80A-U87	Inf	NA	NA	NA	NA	0	oneConditionMissing	0.595395	0.0888158
sp|P78539|SRPX_HUMAN	P78539			80A-U87	Inf	NA	NA	NA	NA	0	oneConditionMissing	0.9375	0.0625
sp|Q05707|COEA1_HUMAN	Q05707			80A-U87	-Inf	NA	NA	NA	NA	0	oneConditionMissing	0.991573	0.240637
sp|Q07092|COGA1_HUMAN	Q07092			80A-U87	Inf	NA	NA	NA	NA	0	oneConditionMissing	0.733333	0.216667
sp|Q12805|FBLN3_HUMAN	Q12805			80A-U87	NA	NA	NA	NA	NA	NA	completeMissing	NA	NA
sp|Q14767|LTBP2_HUMAN	Q14767			80A-U87	Inf	NA	NA	NA	NA	0	oneConditionMissing	0.541667	0.0416667
sp|Q15063|POSTN_HUMAN	Q15063			80A-U87	NA	NA	NA	NA	NA	NA	completeMissing	1	0
sp|Q16270|IBP7_HUMAN	Q16270			80A-U87	Inf	NA	NA	NA	NA	0	oneConditionMissing	0.623333	0.123333
sp|Q16787|LAMA3_HUMAN	Q16787			80A-U87	Inf	NA	NA	NA	NA	0	oneConditionMissing	0.5	0
sp|Q6PCB0|VWA1_HUMAN	Q6PCB0			80A-U87	Inf	NA	NA	NA	NA	0	oneConditionMissing	0.79375	0.29375
sp|Q8IUX7|AEBP1_HUMAN	Q8IUX7			80A-U87	Inf	NA	NA	NA	NA	0	oneConditionMissing	0.928571	0.303571
sp|Q8N2S1|LTBP4_HUMAN	Q8N2S1			80A-U87	NA	NA	NA	NA	NA	NA	completeMissing	1	0
sp|Q8TER0|SNED1_HUMAN	Q8TER0			80A-U87	Inf	NA	NA	NA	NA	0	oneConditionMissing	0.75	0
sp|Q96CG8|CTHR1_HUMAN	Q96CG8			80A-U87	Inf	NA	NA	NA	NA	0	oneConditionMissing	0.65	0.15
sp|Q9HB63|NET4_HUMAN	Q9HB63			80A-U87	NA	NA	NA	NA	NA	NA	completeMissing	NA	NA
sp|Q9NR99|MXRA5_HUMAN	Q9NR99			80A-U87	Inf	NA	NA	NA	NA	0	oneConditionMissing	0.97962	0.35462
sp|Q99715|COCA1_HUMAN	Q99715			HBVP-U87	6.74649	0.161644	41.7367	12	2.30926e-14	1.06226e-12	NA	0.508627	0.50592
sp|P02751|FINC_HUMAN	P02751			HBVP-U87	4.40148	0.116959	37.6327	12	7.9492e-14	1.82832e-12	NA	0.255575	0.235258
sp|Q08431|MFGM_HUMAN	Q08431			HBVP-U87	2.94549	0.0864724	34.0628	12	2.6068e-13	3.9971e-12	NA	0.607143	0.607143
sp|P11047|LAMC1_HUMAN	P11047			HBVP-U87	4.23667	0.204406	20.7268	12	9.19083e-11	1.05694e-09	NA	0.589836	0.579569
sp|P02452|CO1A1_HUMAN	P02452			HBVP-U87	4.03933	0.202781	19.9196	12	1.46192e-10	1.34496e-09	NA	0.496	0.496
sp|P07942|LAMB1_HUMAN	P07942			HBVP-U87	3.20819	0.169384	18.9403	12	2.63103e-10	2.01712e-09	NA	0.58364	0.570159
sp|Q92626|PXDN_HUMAN	Q92626			HBVP-U87	2.82621	0.120658	23.4233	10	4.55678e-10	2.99445e-09	NA	0.690122	0.432255
sp|P08123|CO1A2_HUMAN	P08123			HBVP-U87	4.0119	0.226988	17.6745	12	5.87495e-10	3.3781e-09	NA	0.451754	0.451754
sp|P13611|CSPG2_HUMAN	P13611			HBVP-U87	4.21039	0.267522	15.7385	12	2.2405e-09	1.14514e-08	NA	0.36531	0.357558
sp|P98160|PGBM_HUMAN	P98160			HBVP-U87	3.62342	0.23902	15.1595	12	3.4435e-09	1.58401e-08	NA	0.657473	0.645816
sp|P07585|PGS2_HUMAN	P07585			HBVP-U87	3.29903	0.127142	25.9476	8	5.22359e-09	2.18441e-08	NA	0.39881	0.27381
sp|P12111|CO6A3_HUMAN	P12111			HBVP-U87	1.99742	0.146715	13.6143	12	1.17117e-08	4.4895e-08	NA	0.188623	0.162922
sp|O00468|AGRIN_HUMAN	O00468			HBVP-U87	2.62314	0.178431	14.7011	11	1.40832e-08	4.98329e-08	NA	0.753159	0.627256
sp|P12109|CO6A1_HUMAN	P12109			HBVP-U87	2.06763	0.157637	13.1164	12	1.7841e-08	5.86203e-08	NA	0.190309	0.169242
sp|P12110|CO6A2_HUMAN	P12110			HBVP-U87	1.89348	0.147076	12.8742	12	2.20082e-08	6.74917e-08	NA	0.211373	0.185086
sp|P05997|CO5A2_HUMAN	P05997			HBVP-U87	2.99525	0.222458	13.4644	11	3.53249e-08	1.01559e-07	NA	0.556818	0.431818
sp|Q16363|LAMA4_HUMAN	Q16363			HBVP-U87	3.16951	0.210515	15.0559	9	1.09221e-07	2.95539e-07	NA	0.639435	0.259828
sp|Q15113|PCOC1_HUMAN	Q15113			HBVP-U87	2.17467	0.151977	14.3092	8	5.55071e-07	1.41851e-06	NA	0.125	0
sp|Q9Y6C2|EMIL1_HUMAN	Q9Y6C2			HBVP-U87	4.70325	0.389086	12.088	9	7.23533e-07	1.75171e-06	NA	0.514908	0.137041
sp|P98095|FBLN2_HUMAN	P98095			HBVP-U87	1.86671	0.157837	11.8268	9	8.71392e-07	2.0042e-06	NA	0.665221	0.286278
sp|Q6ZMP0|THSD4_HUMAN	Q6ZMP0			HBVP-U87	1.85569	0.199552	9.29928	11	1.52031e-06	3.3302e-06	NA	0.615546	0.490546
sp|Q14112|NID2_HUMAN	Q14112			HBVP-U87	2.4244	0.22861	10.605	9	2.18998e-06	4.57906e-06	NA	0.59611	0.213959
sp|P09486|SPRC_HUMAN	P09486			HBVP-U87	3.17742	0.423446	7.50371	12	7.19789e-06	1.41003e-05	NA	0.609127	0.609127
sp|Q14766|LTBP1_HUMAN	Q14766			HBVP-U87	3.09598	0.337802	9.16507	9	7.35666e-06	1.41003e-05	NA	0.690034	0.306588
sp|P55268|LAMB2_HUMAN	P55268			HBVP-U87	1.4678	0.215336	6.81631	12	1.85919e-05	3.4209e-05	NA	0.964212	0.958506
sp|O15230|LAMA5_HUMAN	O15230			HBVP-U87	2.29597	0.363758	6.31182	12	3.87868e-05	6.86228e-05	NA	0.828947	0.823935
sp|O94813|SLIT2_HUMAN	O94813			HBVP-U87	2.51595	0.296101	8.49693	7	6.19144e-05	0.000105484	NA	0.532051	0.532051
sp|Q9UBX5|FBLN5_HUMAN	Q9UBX5			HBVP-U87	4.49656	0.376599	11.9399	5	7.26444e-05	0.000119344	NA	0.524038	0.137019
sp|Q05707|COEA1_HUMAN	Q05707			HBVP-U87	1.80064	0.18483	9.74213	4	0.000621769	0.000986255	NA	0.544007	0.291199
sp|Q16610|ECM1_HUMAN	Q16610			HBVP-U87	0.78268	0.167064	4.68491	11	0.00066623	0.00102155	NA	0.765625	0.640625
sp|O00339|MATN2_HUMAN	O00339			HBVP-U87	0.897712	0.203756	4.40582	12	0.000856614	0.0012711	NA	0.65625	0.65625
sp|P27658|CO8A1_HUMAN	P27658			HBVP-U87	2.58865	0.54036	4.7906	9	0.000986567	0.00141819	NA	0.712963	0.337963
sp|P08572|CO4A2_HUMAN	P08572			HBVP-U87	2.28335	0.551936	4.13698	9	0.00253299	0.00353084	NA	0.730114	0.355114
sp|P20908|CO5A1_HUMAN	P20908			HBVP-U87	1.26324	0.350779	3.60126	10	0.00483781	0.00654528	NA	0.792135	0.542135
sp|O00622|CCN1_HUMAN	O00622			HBVP-U87	0.72919	0.298573	2.44225	10	0.034715	0.0456254	NA	0.816667	0.566667
sp|O00534|VMA5A_HUMAN	O00534			HBVP-U87	0.906818	0.260726	3.47805	3	0.0401118	0.0505917	NA	0.375	0
sp|Q6UXH1|CREL2_HUMAN	Q6UXH1			HBVP-U87	0.886505	0.341038	2.59943	6	0.0406933	0.0505917	NA	0.6	0.225
sp|Q02388|CO7A1_HUMAN	Q02388			HBVP-U87	0.951636	0.490454	1.94031	11	0.0783997	0.0949049	NA	0.854938	0.729938
sp|P35555|FBN1_HUMAN	P35555			HBVP-U87	1.09427	0.655061	1.67048	12	0.120679	0.142339	NA	0.415138	0.415138
sp|Q15582|BGH3_HUMAN	Q15582			HBVP-U87	0.282855	0.173475	1.63053	12	0.128939	0.14828	NA	0.188865	0.162664
sp|Q96HD1|CREL1_HUMAN	Q96HD1			HBVP-U87	0.279206	0.180268	1.54884	4	0.196344	0.220288	NA	0.375	0
sp|Q9BXX0|EMIL2_HUMAN	Q9BXX0			HBVP-U87	-0.195126	0.178997	-1.09011	10	0.301235	0.329924	NA	0.880682	0.630682
sp|P24821|TENA_HUMAN	P24821			HBVP-U87	-0.393592	0.385255	-1.02164	10	0.331031	0.354126	NA	0.145383	0.131032
sp|P22105|TENX_HUMAN	P22105			HBVP-U87	0.154427	0.352093	0.438597	6	0.676305	0.707046	NA	0.99184	0.36684
sp|Q9GZM7|TINAL_HUMAN	Q9GZM7			HBVP-U87	0.0856584	0.400127	0.214078	10	0.834788	0.853339	NA	0.939286	0.675
sp|P35442|TSP2_HUMAN	P35442			HBVP-U87	-0.0651399	0.461023	-0.141294	9	0.89075	0.89075	NA	0.805556	0.430556
sp|O43854|EDIL3_HUMAN	O43854			HBVP-U87	-Inf	NA	NA	NA	NA	0	oneConditionMissing	0.850962	0.350962
sp|O60687|SRPX2_HUMAN	O60687			HBVP-U87	Inf	NA	NA	NA	NA	0	oneConditionMissing	0.916667	0.166667
sp|O95428|PPN_HUMAN	O95428			HBVP-U87	NA	NA	NA	NA	NA	NA	completeMissing	1	0
sp|O95967|FBLN4_HUMAN	O95967			HBVP-U87	Inf	NA	NA	NA	NA	0	oneConditionMissing	0.554688	0.0546875
sp|P02461|CO3A1_HUMAN	P02461			HBVP-U87	Inf	NA	NA	NA	NA	0	oneConditionMissing	0.592262	0.0922619
sp|P02462|CO4A1_HUMAN	P02462			HBVP-U87	Inf	NA	NA	NA	NA	0	oneConditionMissing	0.65625	0.15625
sp|P07996|TSP1_HUMAN	P07996			HBVP-U87	Inf	NA	NA	NA	NA	0	oneConditionMissing	0.5	0
sp|P08493|MGP_HUMAN	P08493			HBVP-U87	Inf	NA	NA	NA	NA	0	oneConditionMissing	0.5625	0.0625
sp|P12107|COBA1_HUMAN	P12107			HBVP-U87	NA	NA	NA	NA	NA	NA	completeMissing	1	0
sp|P14543|NID1_HUMAN	P14543			HBVP-U87	Inf	NA	NA	NA	NA	0	oneConditionMissing	0.763408	0.261678
sp|P18065|IBP2_HUMAN	P18065			HBVP-U87	NA	NA	NA	NA	NA	NA	completeMissing	NA	NA
sp|P21810|PGS1_HUMAN	P21810			HBVP-U87	Inf	NA	NA	NA	NA	0	oneConditionMissing	0.55	0.05
sp|P22692|IBP4_HUMAN	P22692			HBVP-U87	Inf	NA	NA	NA	NA	0	oneConditionMissing	0.875	0.229167
sp|P23142|FBLN1_HUMAN	P23142			HBVP-U87	Inf	NA	NA	NA	NA	0	oneConditionMissing	0.507353	0.00245098
sp|P24043|LAMA2_HUMAN	P24043			HBVP-U87	Inf	NA	NA	NA	NA	0	oneConditionMissing	0.950855	0.32265
sp|P24593|IBP5_HUMAN	P24593			HBVP-U87	Inf	NA	NA	NA	NA	0	oneConditionMissing	0.75	0
sp|P25940|CO5A3_HUMAN	P25940			HBVP-U87	NA	NA	NA	NA	NA	NA	completeMissing	NA	NA
sp|P29279|CCN2_HUMAN	P29279			HBVP-U87	Inf	NA	NA	NA	NA	0	oneConditionMissing	0.791667	0.291667
sp|P35556|FBN2_HUMAN	P35556			HBVP-U87	Inf	NA	NA	NA	NA	0	oneConditionMissing	0.564516	0.0645161
sp|P39059|COFA1_HUMAN	P39059			HBVP-U87	Inf	NA	NA	NA	NA	0	oneConditionMissing	0.545608	0.0422297
sp|P39060|COIA1_HUMAN	P39060			HBVP-U87	Inf	NA	NA	NA	NA	0	oneConditionMissing	0.6125	0.109868
sp|P78539|SRPX_HUMAN	P78539			HBVP-U87	Inf	NA	NA	NA	NA	0	oneConditionMissing	0.875	0.125
sp|Q07092|COGA1_HUMAN	Q07092			HBVP-U87	Inf	NA	NA	NA	NA	0	oneConditionMissing	0.666667	0.15
sp|Q12805|FBLN3_HUMAN	Q12805			HBVP-U87	Inf	NA	NA	NA	NA	0	oneConditionMissing	NA	NA
sp|Q14767|LTBP2_HUMAN	Q14767			HBVP-U87	Inf	NA	NA	NA	NA	0	oneConditionMissing	0.805556	0.305556
sp|Q15063|POSTN_HUMAN	Q15063			HBVP-U87	Inf	NA	NA	NA	NA	0	oneConditionMissing	0.791667	0.291667
sp|Q16270|IBP7_HUMAN	Q16270			HBVP-U87	NA	NA	NA	NA	NA	NA	completeMissing	1	0
sp|Q16787|LAMA3_HUMAN	Q16787			HBVP-U87	NA	NA	NA	NA	NA	NA	completeMissing	1	0
sp|Q6PCB0|VWA1_HUMAN	Q6PCB0			HBVP-U87	Inf	NA	NA	NA	NA	0	oneConditionMissing	0.85625	0.35625
sp|Q7Z7G0|TARSH_HUMAN	Q7Z7G0			HBVP-U87	-Inf	NA	NA	NA	NA	0	oneConditionMissing	0.947917	0.197917
sp|Q8IUX7|AEBP1_HUMAN	Q8IUX7			HBVP-U87	Inf	NA	NA	NA	NA	0	oneConditionMissing	0.517857	0.0178571
sp|Q8N2S1|LTBP4_HUMAN	Q8N2S1			HBVP-U87	Inf	NA	NA	NA	NA	0	oneConditionMissing	0.512931	0.012931
sp|Q8TER0|SNED1_HUMAN	Q8TER0			HBVP-U87	Inf	NA	NA	NA	NA	0	oneConditionMissing	0.5	0
sp|Q96CG8|CTHR1_HUMAN	Q96CG8			HBVP-U87	Inf	NA	NA	NA	NA	0	oneConditionMissing	0.725	0.225
sp|Q9HB63|NET4_HUMAN	Q9HB63			HBVP-U87	NA	NA	NA	NA	NA	NA	completeMissing	NA	NA
sp|Q9NR99|MXRA5_HUMAN	Q9NR99			HBVP-U87	Inf	NA	NA	NA	NA	0	oneConditionMissing	0.605978	0.105978
